# Supplementary material for: The network interplay of interferon and toll-like receptor signaling pathways in the anti-Candida immune response
Source: Research Square preprint supplement (doi:10.21203/rs.3.rs-279551/v3), 2021-09-13
Supplement: Supplementary file 1 [file 5ba78dfb3fecddb95f4943f8.pdf]

a

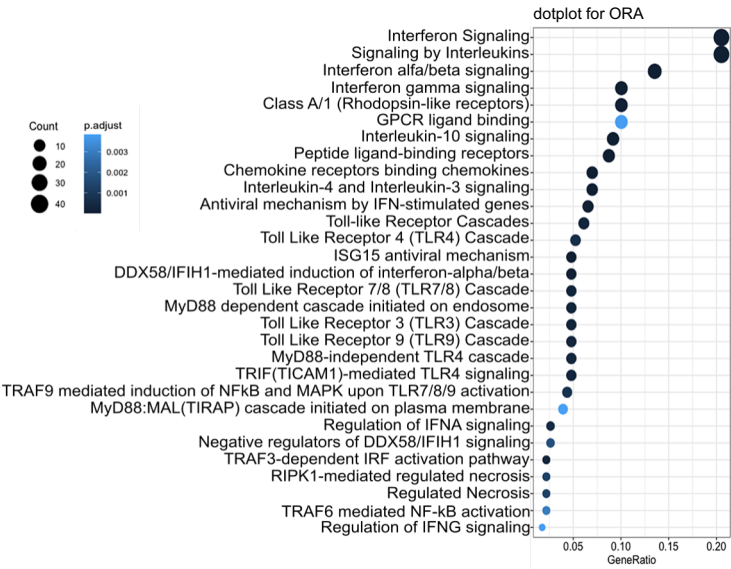

b

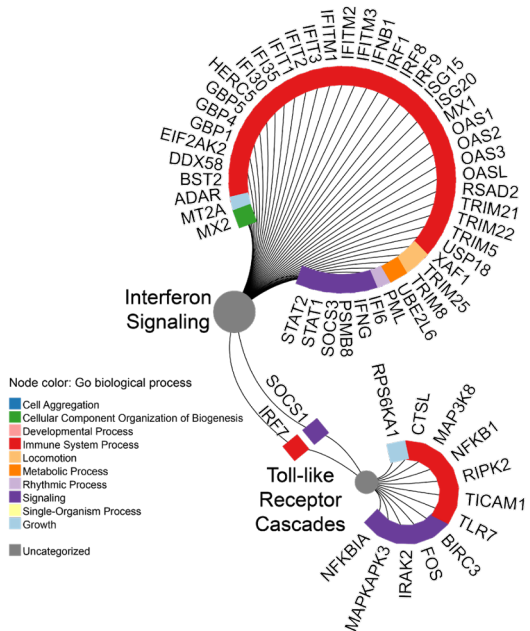

c

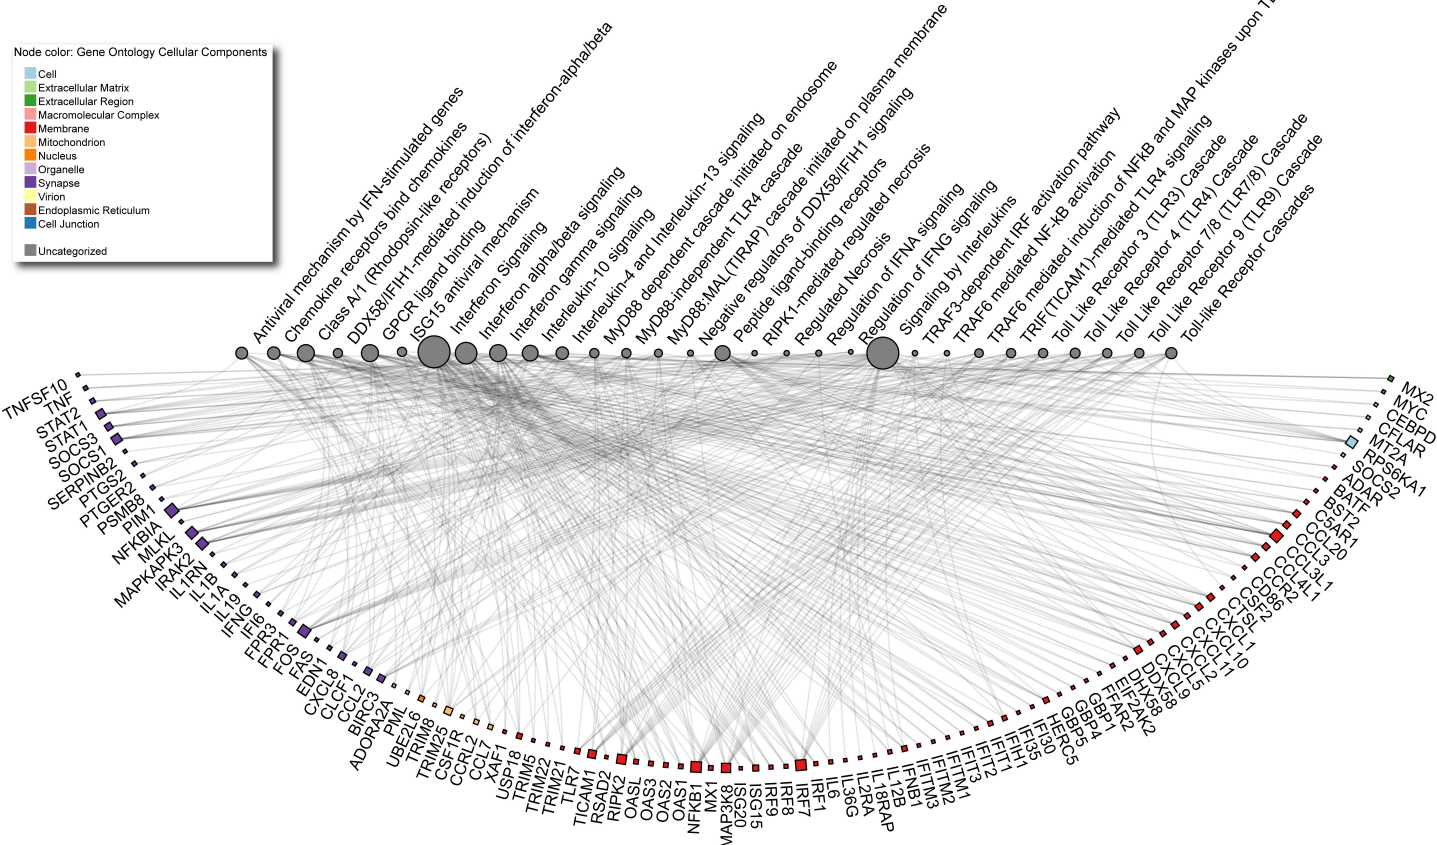

**Suppl. Fig. 1. Functional clustering of DEGs associates TLR and IFN signaling pathways.**

**a**, Dot plot showing the 30 most enriched signaling pathways obtained by ORA of DEGs (dataset GSE42606) using ClusterProfiler. Y-axis contains enriched pathways while the size of circles represents the number of genes (count) enriching each category and color (from blue to black) indicates how significant (when p-value < 0.05) enriched is the pathway. **b**, Network of TLR- and IFN-associated genes enriching signaling pathways showed in the dot plot (a). The network includes genes upregulated and downregulated (**Suppl. Table S4**) when comparing resting with *C. albicans*-infected PBMCs. The size of circles represents the number (counts) of genes that enrich the pathway, and colored squares represent the cell location of genes. **c**, Network demonstrating interactions between pathways and their associated genes revealed by ORA. Circular nodes represent pathways and the circle size is associated with the number of genes that enrich each pathway, while colored squares represent the cell location of genes. The interaction network was build using the NAViGaTOR software. *DEGs*, Differentially Expressed Genes; *IFN*, Interferon; *ORA*, Over-representation Analysis; *TLR*, Toll-like Receptor.

**a**

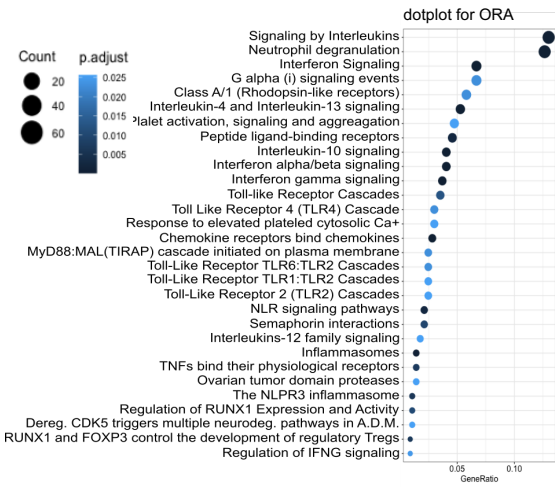

**b**

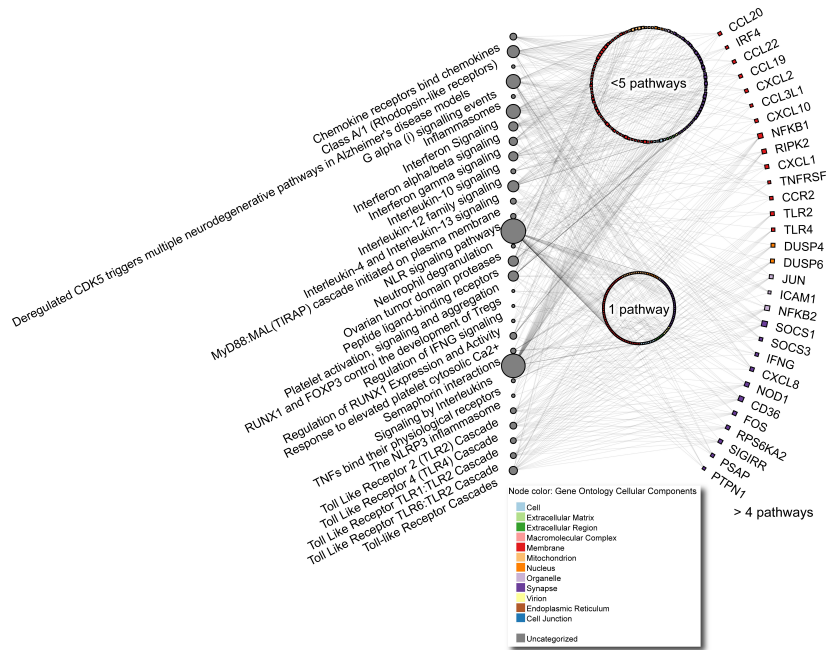

**Suppl. Fig. 2. Induction of TLR and IFN signaling pathways by *Candida auris*.** **a**, Dot plot showing the 30 most enriched signaling pathways obtained by ORA of DEGs using ClusterProfiler. Y-axis contains enriched pathways while the size of circles represents the number of genes (count) enriching each category and color (from blue to black) indicating how significantly enriched (when p-value <0.05) is the pathway. **b**, Network demonstrating interactions between pathways and their associated genes revealed by ORA. Circular nodes represent pathways, circle size is associated with the number of genes enriching each pathway, while colored squares represent the cell location of genes. Genes interacting with more than 5 pathways are named. The interaction network was build using the NAViGaTOR software.



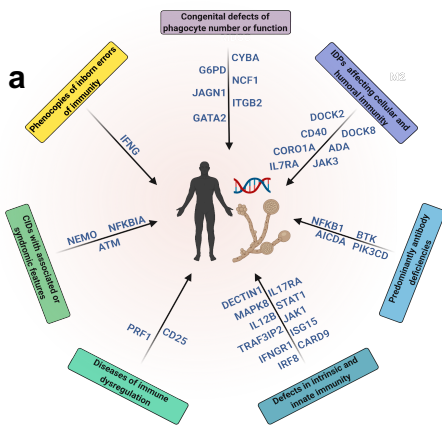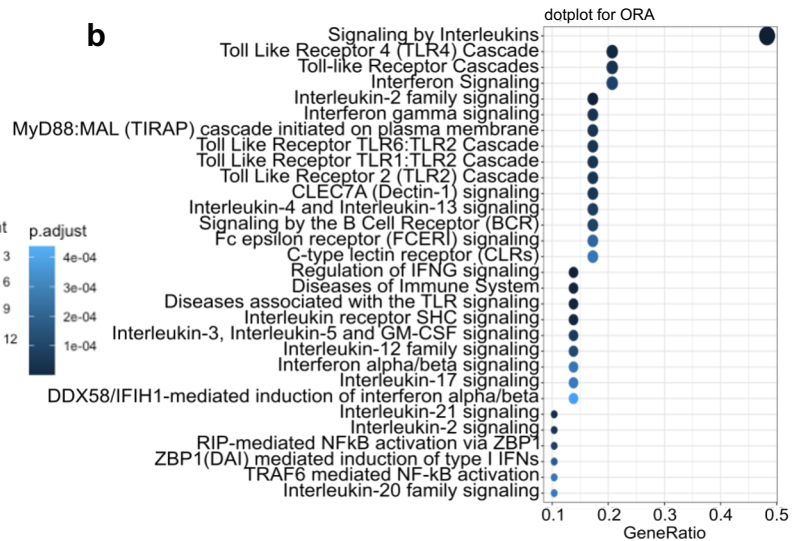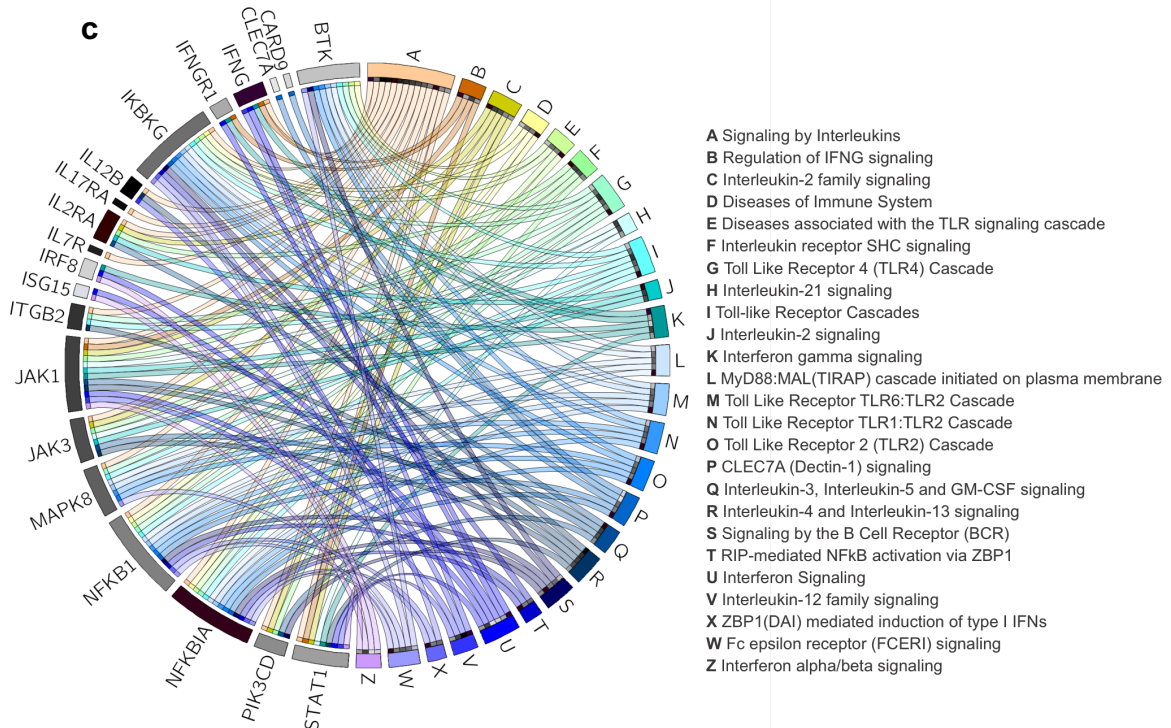

**Suppl. Fig. 3. Inborn errors of immunity confirm the interplay of TLR- and IFN-associated genes.** **a**, Overview (created using BioRender.com) of genes associated with inborn errors of immunity that are also found among the DEGs across the 7 datasets of WBCs, PBMCs, and moDCs (**Suppl. Table S16**). **b**, Dot plot showing the 30 most enriched signaling pathways obtained by ORA of DEGs seen in (**a**). Y-axis contains enriched pathways while the size of circles represents the number of genes (count) enriching each category and color (from blue to black) indicates how significantly enriched (when p-value <0.05) is each pathway. **c**, GOPlot displaying genes causing inborn errors of immunity and enriched pathways. *DEGs*, Differentially Expressed Genes; *moDCs*, Monocyte-Derived Dendritic Cells; *IFN*, Interferon; *ORA*, Over-representation Analysis; *PBMCs*, Peripheral Blood Mononuclear Cells; *TLR*, Toll-like Receptor; *WBCs*, White Blood Cells.
