# Supplementary material for: The network interplay of interferon and toll-like receptor signaling pathways in the anti-Candida immune response
Source: Research Square preprint supplement (doi:10.21203/rs.3.rs-279551/v3), 2021-09-13
Supplement: Supplementary file 1 [file 74ba1f1c5fee61422cd7f447.xlsx]

## Sheet: README
Supplementary Material_Tables S1-S18
Supplementary Table S1. Total DEGs from single-cell data divided by C. albicans-activated cell clusters.
Supplementary Table S2. ORA pathways enriched by DEGs from scRNAseq data (PBMCs).
Supplementary Table S3. References associating DEGS of the Interferon and toll-like receptor signaling cascades from the scRNAseq data (REF).
Supplementary Table S4. Signaling pathways enriched by DEGs from GSE42606 (PBMCs) .
Supplementary Table S5. Meta-significant genes among WBCs and PBMCs datasets (GSE65088, GSE114180, GSE42606, and GSE154911).
Supplementary Table S6. Result of enrichment analysis using EnrichR (ref. BioPlanet) of 44 genes in common between WBCs (GSE65088, GSE114179) and PBMCs (GSE42606, GSE154911) datasets.
Supplementary Table S7. Loading values obtained by multi-factory study analyses of both common factors found between GSE65088 and GSE42606 common DEGs.
Supplementary Table S8. List of shared biological processes among all datasets (GSE65088, GSE114179, GSE42606, GSE154911, E-MTAB-135, E-MTAB-751, GSE77969) as analyzed using ClusterProfiler.
Supplementary Table S9. DEGs up- and down-regulated from each study.
Supplementary Table S10. List of shared biological processes and their associated DEGs among all datasets (GSE65088, GSE114179, GSE42606, GSE154911, E-MTAB-135, E-MTAB-751, GSE77969) generated by ClusterProfiler.
Supplementary Table S11. Gene symbol, name, and function of genes (total of 1096) modulated by C. albicans immune response found across all datasets investigated.
Supplementary Table S12. Genes modulated by C. albicans immune across all datasets (total of 1096) and Reactome enrichment analysis performed using Cytoscape.
Supplementary Table S13. DEGs associated with Interferon and toll-like receptor signaling cascades in response to Candida spp. infection from GSE114180.
Supplementary Table S14. Transcriptional evidences associating the 1096 genes found across all microarray and bulRNAseq datasets with Interferon types as determined by Interferome analysis.
Supplementary Table S15. DEGs associated with interferon and toll-like receptor signaling cascades from the scRNAseq data common with those from microarray and bulk datasets.
Supplementary Table S16. References associating inborn errors of immunity and pathways related to candidiasis.
Supplementary Table S17. Identification of samples from datasets.
Supplementary Table S18. General information of datasets and samples .

## Sheet: Table S1
Supplementary Table S1. Total DEGs from single-cell data divided by C. albicans-activated cell clusters.
gene	pvalue	avg_log2FC	pct.1	pct.2	adjpvalue	cluster
ENSG00000132465	0	4.28461	0.234	0.011	0	B
ENSG00000019582	0	2.8479	0.987	0.516	0	B
ENSG00000156738	0	2.76552	0.741	0.005	0	B
ENSG00000204287	0	2.67871	0.932	0.111	0	B
ENSG00000105369	0	2.64932	0.748	0.005	0	B
ENSG00000231389	0	2.3844	0.881	0.121	0	B
ENSG00000240505	0	2.35124	0.577	0.003	0	B
ENSG00000223865	0	2.30336	0.895	0.192	0	B
ENSG00000196126	0	2.23424	0.871	0.113	0	B
ENSG00000164687	0	2.05185	0.426	0.059	0	B
ENSG00000179344	0	2.03691	0.719	0.063	0	B
ENSG00000196735	0	1.9912	0.728	0.058	0	B
ENSG00000153064	0	1.94957	0.565	0.003	0	B
ENSG00000042980	0	1.7946	0.437	0.017	0	B
ENSG00000081189	0	1.78269	0.499	0.009	0	B
ENSG00000253701	0	1.66075	0.33	0.001	0	B
ENSG00000112149	0	1.6557	0.549	0.095	0	B
ENSG00000138639	0	1.57426	0.44	0.01	0	B
ENSG00000007312	0	1.4545	0.408	0.021	0	B
ENSG00000170476	0	1.34635	0.227	0.012	0	B
ENSG00000204257	0	1.34493	0.489	0.055	0	B
ENSG00000196628	0	1.34227	0.42	0.016	0	B
ENSG00000100721	0	1.3072	0.174	0.001	0	B
ENSG00000237541	0	1.25488	0.39	0.04	0	B
ENSG00000101017	0	1.20462	0.451	0.041	0	B
ENSG00000247982	0	1.1968	0.289	0.004	0	B
ENSG00000242574	0	1.16241	0.38	0.028	0	B
ENSG00000269404	0	1.14989	0.324	0.006	0	B
ENSG00000168734	0	1.14369	0.361	0.013	0	B
ENSG00000103811	0	1.13988	0.426	0.05	0	B
ENSG00000095585	0	1.13845	0.332	0.003	0	B
ENSG00000176533	0	1.12175	0.285	0.008	0	B
ENSG00000177455	0	1.03917	0.305	0.002	0	B
ENSG00000125726	0	1.00884	0.292	0.02	0	B
ENSG00000226777	0	0.982263	0.221	0.002	0	B
ENSG00000184293	0	0.941908	0.351	0.023	0	B
ENSG00000138185	0	0.927187	0.297	0.025	0	B
ENSG00000112799	0	0.902936	0.266	0.012	0	B
ENSG00000224137	0	0.872561	0.217	0.002	0	B
ENSG00000133789	0	0.86448	0.294	0.02	0	B
ENSG00000234184	0	0.861609	0.142	0	0	B
ENSG00000010671	0	0.844525	0.286	0.009	0	B
ENSG00000082438	0	0.834848	0.247	0.001	0	B
ENSG00000205056	0	0.806469	0.194	0.001	0	B
ENSG00000107438	0	0.799455	0.255	0.006	0	B
ENSG00000011590	0	0.772357	0.233	0.012	0	B
ENSG00000012124	0	0.75048	0.203	0.003	0	B
ENSG00000110777	0	0.740848	0.213	0.002	0	B
ENSG00000196092	0	0.739625	0.226	0.001	0	B
ENSG00000260655	0	0.68903	0.195	0.009	0	B
ENSG00000119866	0	0.64823	0.175	0.005	0	B
ENSG00000132185	0	0.618305	0.163	0.001	0	B
ENSG00000167748	0	0.616018	0.124	0.001	0	B
ENSG00000102445	0	0.579654	0.172	0.004	0	B
ENSG00000164330	0	0.540731	0.143	0.002	0	B
ENSG00000143297	0	0.530279	0.15	0	0	B
ENSG00000174123	0	0.484835	0.153	0.001	0	B
ENSG00000151575	0	0.467287	0.12	0.001	0	B
ENSG00000184305	4.79e-304	0.577952	0.131	0.002	9.7e-300	B
ENSG00000117318	3.63e-284	1.31841	0.362	0.045	7.34e-280	B
ENSG00000086730	2.64e-281	0.900887	0.361	0.044	5.35e-277	B
ENSG00000122986	4.51e-281	0.68839	0.209	0.013	9.13e-277	B
ENSG00000254709	6.84e-281	4.25121	0.2	0.012	1.38e-276	B
ENSG00000035720	6.65e-276	0.622848	0.2	0.012	1.35e-271	B
ENSG00000112137	5.92e-268	0.637011	0.165	0.007	1.2e-263	B
ENSG00000145088	2.89e-267	0.755083	0.237	0.019	5.85e-263	B
ENSG00000145416	1.83e-262	0.935395	0.262	0.024	3.7e-258	B
ENSG00000273272	3.26e-261	0.567176	0.151	0.006	6.59e-257	B
ENSG00000028277	9.72e-256	1.29493	0.542	0.115	1.97e-251	B
ENSG00000146192	2.47e-254	0.560774	0.163	0.008	4.99e-250	B
ENSG00000116191	6.36e-252	0.781762	0.247	0.022	1.29e-247	B
ENSG00000160991	9.57e-233	0.996996	0.397	0.065	1.94e-228	B
ENSG00000175857	7.4e-227	0.417899	0.117	0.003	1.5e-222	B
ENSG00000198502	1.38e-226	0.873283	0.234	0.023	2.79e-222	B
ENSG00000163563	1.42e-225	1.13108	0.256	0.028	2.88e-221	B
ENSG00000099956	5.68e-223	0.500878	0.171	0.011	1.15e-218	B
ENSG00000146540	7.19e-222	0.836996	0.294	0.037	1.46e-217	B
ENSG00000114013	9.39e-222	0.583189	0.194	0.015	1.9e-217	B
ENSG00000160683	7.03e-221	0.477243	0.158	0.009	1.42e-216	B
ENSG00000179144	2.44e-219	-2.53699	0.062	0.681	4.94e-215	B
ENSG00000163029	2.24e-211	0.73014	0.289	0.037	4.54e-207	B
ENSG00000008517	2.95e-211	-3.01141	0.119	0.7	5.98e-207	B
ENSG00000123095	3.12e-210	0.443065	0.12	0.005	6.32e-206	B
ENSG00000091490	1.03e-206	0.712101	0.21	0.02	2.09e-202	B
ENSG00000167604	8.52e-204	0.990032	0.274	0.036	1.72e-199	B
ENSG00000100365	1.12e-199	0.69587	0.218	0.022	2.26e-195	B
ENSG00000128815	1.78e-196	0.35691	0.105	0.003	3.6e-192	B
ENSG00000116824	6.53e-195	-2.51161	0.032	0.623	1.32e-190	B
ENSG00000108639	6.09e-193	0.972204	0.39	0.075	1.23e-188	B
ENSG00000076554	4.87e-191	0.910955	0.404	0.081	9.86e-187	B
ENSG00000152492	8.41e-191	0.581862	0.203	0.02	1.7e-186	B
ENSG00000106266	1.82e-187	0.425396	0.16	0.012	3.68e-183	B
ENSG00000205302	3.66e-184	0.89517	0.376	0.072	7.4e-180	B
ENSG00000165025	6.79e-183	0.532031	0.2	0.02	1.37e-178	B
ENSG00000140968	5.04e-180	0.764141	0.272	0.039	1.02e-175	B
ENSG00000100297	1.21e-177	0.557319	0.212	0.024	2.45e-173	B
ENSG00000140105	9.75e-171	1.17632	0.502	0.137	1.97e-166	B
ENSG00000161929	3.33e-170	0.432756	0.113	0.006	6.75e-166	B
ENSG00000112561	3.55e-169	0.357324	0.132	0.008	7.18e-165	B
ENSG00000141682	1.28e-168	1.10655	0.554	0.157	2.6e-164	B
ENSG00000005020	6.69e-168	0.619012	0.28	0.044	1.35e-163	B
ENSG00000167286	4.3e-167	-2.19918	0.043	0.579	8.71e-163	B
ENSG00000137101	2.31e-163	0.430017	0.119	0.007	4.67e-159	B
ENSG00000105246	4.94e-162	0.470172	0.183	0.019	9.99e-158	B
ENSG00000239672	1.76e-161	0.866714	0.261	0.041	3.56e-157	B
ENSG00000204252	1.94e-161	0.403051	0.124	0.008	3.94e-157	B
ENSG00000152689	1.11e-159	0.815919	0.326	0.062	2.25e-155	B
ENSG00000173762	6.25e-157	-2.27596	0.042	0.558	1.27e-152	B
ENSG00000133872	3.24e-152	-1.59347	0.534	0.799	6.55e-148	B
ENSG00000125454	6.8e-150	0.446327	0.171	0.018	1.38e-145	B
ENSG00000133574	1.16e-147	-2.05769	0.046	0.54	2.35e-143	B
ENSG00000123975	2.47e-147	0.660474	0.221	0.032	4.99e-143	B
ENSG00000163568	1.25e-146	0.742816	0.271	0.047	2.54e-142	B
ENSG00000163683	5.97e-135	0.958119	0.297	0.061	1.21e-130	B
ENSG00000176788	1.06e-134	0.436492	0.227	0.035	2.14e-130	B
ENSG00000234883	2.02e-134	1.67285	0.411	0.113	4.08e-130	B
ENSG00000079950	3.22e-132	0.747859	0.255	0.046	6.51e-128	B
ENSG00000213719	8.49e-132	0.998889	0.824	0.433	1.72e-127	B
ENSG00000142534	5.34e-131	0.609202	0.996	0.969	1.08e-126	B
ENSG00000175893	2.37e-130	0.363029	0.148	0.016	4.81e-126	B
ENSG00000171604	4.53e-126	0.436018	0.146	0.016	9.16e-122	B
ENSG00000072694	8.31e-125	0.374074	0.132	0.013	1.68e-120	B
ENSG00000082074	1.27e-124	-1.77654	0.065	0.509	2.57e-120	B
ENSG00000241106	1.4e-117	0.45491	0.127	0.013	2.83e-113	B
ENSG00000174004	5.67e-117	0.391464	0.152	0.019	1.15e-112	B
ENSG00000198851	1.13e-110	-1.67027	0.034	0.449	2.28e-106	B
ENSG00000135046	2.79e-108	-1.87431	0.041	0.45	5.64e-104	B
ENSG00000081237	9.3e-108	-1.14335	0.572	0.798	1.88e-103	B
ENSG00000168685	3.66e-105	-1.91638	0.034	0.434	7.4e-101	B
ENSG00000099840	1.97e-104	0.582531	0.155	0.022	3.99e-100	B
ENSG00000243156	4.59e-104	0.371445	0.118	0.012	9.29e-100	B
ENSG00000163584	1.43e-103	1.09648	0.526	0.209	2.9e-99	B
ENSG00000196329	6.42e-101	-1.60207	0.066	0.451	1.3e-96	B
ENSG00000051108	1.77e-100	0.958164	0.555	0.222	3.58e-96	B
ENSG00000162924	3.11e-100	0.820836	0.544	0.207	6.29e-96	B
ENSG00000124243	1.4e-99	0.48167	0.198	0.036	2.84e-95	B
ENSG00000164649	5.27e-99	0.468169	0.155	0.023	1.07e-94	B
ENSG00000254087	4.8e-98	0.464469	0.219	0.044	9.72e-94	B
ENSG00000042493	1e-97	0.44753	0.245	0.053	2.03e-93	B
ENSG00000185650	8.22e-97	1.01969	0.605	0.267	1.66e-92	B
ENSG00000179958	2.2e-96	0.502855	0.24	0.052	4.46e-92	B
ENSG00000198498	6.88e-94	0.433818	0.247	0.055	1.39e-89	B
ENSG00000182199	1.05e-93	0.466478	0.232	0.05	2.12e-89	B
ENSG00000104904	8.04e-93	0.632082	0.97	0.873	1.63e-88	B
ENSG00000170006	1.11e-92	0.498258	0.203	0.04	2.24e-88	B
ENSG00000063241	6.31e-92	0.333454	0.175	0.03	1.28e-87	B
ENSG00000104549	2.18e-91	0.488194	0.242	0.055	4.41e-87	B
ENSG00000048162	1.09e-90	0.356773	0.17	0.029	2.22e-86	B
ENSG00000170873	1.55e-87	0.519108	0.199	0.04	3.15e-83	B
ENSG00000123352	7.76e-87	0.408899	0.183	0.035	1.57e-82	B
ENSG00000123416	2.89e-86	1.14263	0.527	0.237	5.86e-82	B
ENSG00000198818	5.74e-86	0.572876	0.341	0.102	1.16e-81	B
ENSG00000173193	6.45e-86	0.914917	0.689	0.349	1.3e-81	B
ENSG00000053372	2.41e-85	0.43632	0.217	0.047	4.87e-81	B
ENSG00000137502	3.59e-85	0.377437	0.114	0.014	7.26e-81	B
ENSG00000171700	1.89e-84	0.502872	0.229	0.053	3.82e-80	B
ENSG00000262814	3.41e-83	0.48653	0.219	0.05	6.89e-79	B
ENSG00000143799	2.21e-82	0.585993	0.388	0.129	4.48e-78	B
ENSG00000169245	3.72e-82	1.2887	0.352	0.118	7.52e-78	B
ENSG00000066923	4.75e-82	0.534452	0.167	0.031	9.62e-78	B
ENSG00000244509	9.46e-82	0.594192	0.402	0.135	1.91e-77	B
ENSG00000114978	1.41e-81	0.665267	0.511	0.202	2.84e-77	B
ENSG00000115020	1.51e-81	0.364777	0.137	0.021	3.07e-77	B
ENSG00000117054	5.84e-81	0.409727	0.238	0.058	1.18e-76	B
ENSG00000114446	8.4e-81	0.451543	0.213	0.048	1.7e-76	B
ENSG00000142684	2.73e-80	0.428265	0.227	0.054	5.53e-76	B
ENSG00000198821	1.52e-77	-1.50298	0.028	0.354	3.08e-73	B
ENSG00000211450	1.97e-77	0.731511	0.736	0.409	3.99e-73	B
ENSG00000126457	2.09e-77	0.597232	0.361	0.12	4.22e-73	B
ENSG00000102962	3.31e-77	0.954621	0.131	0.021	6.69e-73	B
ENSG00000142252	4.41e-77	0.359092	0.207	0.047	8.93e-73	B
ENSG00000166797	3.14e-76	0.575731	0.399	0.14	6.34e-72	B
ENSG00000085117	3.22e-76	0.570575	0.265	0.073	6.51e-72	B
ENSG00000166501	1.47e-75	0.539773	0.25	0.067	2.98e-71	B
ENSG00000100220	1.9e-75	0.5274	0.286	0.084	3.84e-71	B
ENSG00000237943	8.19e-75	-1.40098	0.019	0.332	1.66e-70	B
ENSG00000161981	1.71e-74	0.351993	0.194	0.043	3.47e-70	B
ENSG00000105364	1.72e-74	0.383893	0.215	0.052	3.47e-70	B
ENSG00000112335	2.05e-74	0.504231	0.318	0.099	4.15e-70	B
ENSG00000205542	2.84e-74	-0.522572	0.997	0.999	5.75e-70	B
ENSG00000196937	2.71e-73	0.372116	0.188	0.041	5.48e-69	B
ENSG00000118308	4.09e-73	0.421099	0.184	0.04	8.27e-69	B
ENSG00000177885	7e-72	0.48132	0.261	0.074	1.42e-67	B
ENSG00000104660	1.29e-71	-1.32862	0.127	0.428	2.61e-67	B
ENSG00000235750	4.9e-71	0.547037	0.255	0.072	9.92e-67	B
ENSG00000105967	2.4e-70	0.326786	0.11	0.016	4.85e-66	B
ENSG00000135900	4.27e-70	0.673807	0.253	0.073	8.64e-66	B
ENSG00000198886	6.54e-70	0.49712	0.995	0.987	1.32e-65	B
ENSG00000214900	2.2e-69	0.276965	0.123	0.02	4.45e-65	B
ENSG00000245532	4.45e-68	-1.03612	0.693	0.823	9.01e-64	B
ENSG00000211455	5.53e-68	0.263555	0.139	0.026	1.12e-63	B
ENSG00000198712	7.79e-68	0.484929	0.996	0.989	1.58e-63	B
ENSG00000137818	1.02e-67	0.355435	0.999	0.998	2.07e-63	B
ENSG00000143870	1.8e-67	0.593499	0.423	0.165	3.65e-63	B
ENSG00000169100	2.19e-67	0.634551	0.913	0.742	4.42e-63	B
ENSG00000105640	4.68e-67	0.378406	0.997	0.991	9.47e-63	B
ENSG00000171791	8.45e-67	0.435248	0.194	0.047	1.71e-62	B
ENSG00000216490	2.65e-66	0.391103	0.224	0.06	5.37e-62	B
ENSG00000173207	5.86e-66	0.426003	0.251	0.073	1.19e-61	B
ENSG00000182866	2.13e-65	-1.2375	0.06	0.349	4.31e-61	B
ENSG00000120675	2.64e-65	0.521052	0.388	0.145	5.34e-61	B
ENSG00000159199	3.37e-65	0.638006	0.442	0.186	6.82e-61	B
ENSG00000134248	3.72e-65	0.626815	0.591	0.287	7.53e-61	B
ENSG00000177548	4.16e-65	0.331477	0.108	0.017	8.42e-61	B
ENSG00000102575	1.23e-64	0.382739	0.196	0.049	2.48e-60	B
ENSG00000054611	1.53e-64	0.416056	0.261	0.078	3.1e-60	B
ENSG00000104972	2.07e-64	0.359338	0.163	0.036	4.18e-60	B
ENSG00000154978	5.66e-64	0.332812	0.183	0.044	1.15e-59	B
ENSG00000025708	7.12e-64	0.616433	0.49	0.216	1.44e-59	B
ENSG00000196396	8.15e-64	0.660594	0.515	0.235	1.65e-59	B
ENSG00000184220	8.76e-64	0.337145	0.203	0.052	1.77e-59	B
ENSG00000203667	9.12e-63	0.495586	0.383	0.143	1.85e-58	B
ENSG00000128989	1.33e-62	0.443271	0.349	0.123	2.69e-58	B
ENSG00000198938	2.86e-62	0.431356	0.995	0.993	5.79e-58	B
ENSG00000132341	2.94e-62	0.970607	0.608	0.359	5.95e-58	B
ENSG00000198771	3.93e-62	0.444246	0.253	0.077	7.95e-58	B
ENSG00000096384	1.48e-61	0.904928	0.701	0.464	3e-57	B
ENSG00000121895	3.52e-61	0.439703	0.171	0.041	7.11e-57	B
ENSG00000143353	1.08e-60	0.29459	0.132	0.026	2.18e-56	B
ENSG00000117450	1.29e-60	0.77717	0.414	0.179	2.6e-56	B
ENSG00000168461	1.35e-60	0.286563	0.138	0.028	2.73e-56	B
ENSG00000083845	2.43e-60	0.42267	0.994	0.959	4.92e-56	B
ENSG00000136840	2.59e-60	0.275335	0.125	0.024	5.24e-56	B
ENSG00000167085	2.61e-60	0.587134	0.343	0.13	5.28e-56	B
ENSG00000105887	3.46e-60	0.507121	0.381	0.147	7e-56	B
ENSG00000092820	1.96e-59	0.588858	0.446	0.19	3.97e-55	B
ENSG00000172869	5.5e-59	0.365288	0.137	0.029	1.11e-54	B
ENSG00000130348	1.16e-58	0.318128	0.16	0.037	2.34e-54	B
ENSG00000137547	2.88e-58	0.275403	0.161	0.037	5.82e-54	B
ENSG00000172500	9.76e-58	0.377611	0.293	0.098	1.97e-53	B
ENSG00000145912	1.11e-57	0.697852	0.416	0.183	2.25e-53	B
ENSG00000189159	1.37e-57	0.571778	0.345	0.132	2.77e-53	B
ENSG00000172172	2.46e-57	0.29596	0.237	0.07	4.98e-53	B
ENSG00000172531	9.86e-57	0.503887	0.489	0.218	2e-52	B
ENSG00000187735	1.22e-56	0.627743	0.572	0.288	2.47e-52	B
ENSG00000196465	1.23e-56	0.260983	0.156	0.036	2.48e-52	B
ENSG00000070756	3.51e-56	-1.14902	0.932	0.876	7.11e-52	B
ENSG00000125835	5.54e-56	0.609958	0.565	0.29	1.12e-51	B
ENSG00000187514	6.38e-56	0.479498	0.997	0.993	1.29e-51	B
ENSG00000139291	6.52e-56	0.337115	0.118	0.023	1.32e-51	B
ENSG00000213722	5.28e-55	0.432572	0.2	0.057	1.07e-50	B
ENSG00000028116	7.02e-55	0.28786	0.136	0.029	1.42e-50	B
ENSG00000213658	1.24e-54	-1.11253	0.03	0.281	2.5e-50	B
ENSG00000077984	1.31e-54	-2.03094	0.032	0.281	2.65e-50	B
ENSG00000106560	1.55e-54	-1.15459	0.072	0.328	3.13e-50	B
ENSG00000198899	1.74e-54	0.506234	0.991	0.972	3.52e-50	B
ENSG00000198736	2.01e-54	0.341572	0.188	0.051	4.06e-50	B
ENSG00000162144	2.26e-54	0.411268	0.2	0.057	4.58e-50	B
ENSG00000030582	2.32e-54	0.277699	0.25	0.08	4.7e-50	B
ENSG00000162734	2.34e-54	0.327326	0.199	0.056	4.73e-50	B
ENSG00000197555	2.95e-54	0.397824	0.177	0.047	5.98e-50	B
ENSG00000158710	3.82e-54	0.654985	0.662	0.372	7.73e-50	B
ENSG00000092531	3.93e-54	0.459081	0.257	0.086	7.96e-50	B
ENSG00000137692	5.75e-54	0.31645	0.205	0.059	1.16e-49	B
ENSG00000133112	9.13e-54	-0.365563	0.997	0.996	1.85e-49	B
ENSG00000181817	1.24e-53	0.473066	0.375	0.15	2.52e-49	B
ENSG00000198888	1.54e-53	0.450766	0.986	0.959	3.11e-49	B
ENSG00000160654	2.24e-53	-1.15369	0.014	0.255	4.53e-49	B
ENSG00000251562	2.37e-53	-0.313514	1	1	4.79e-49	B
ENSG00000069667	2.55e-53	-1.20372	0.109	0.366	5.15e-49	B
ENSG00000215021	3.69e-53	0.464265	0.364	0.144	7.46e-49	B
ENSG00000138670	4.72e-53	0.467817	0.188	0.053	9.55e-49	B
ENSG00000142937	5.08e-53	0.36543	0.997	0.989	1.03e-48	B
ENSG00000109475	6.18e-53	-0.370978	0.995	0.996	1.25e-48	B
ENSG00000099875	7.7e-53	0.459321	0.208	0.062	1.56e-48	B
ENSG00000187840	8.66e-53	0.306678	0.198	0.056	1.75e-48	B
ENSG00000161016	1.22e-52	0.340695	0.995	0.985	2.47e-48	B
ENSG00000172590	1.58e-52	0.525012	0.435	0.193	3.2e-48	B
ENSG00000151092	1.83e-52	0.409928	0.251	0.084	3.7e-48	B
ENSG00000173200	1.88e-52	0.314914	0.114	0.022	3.8e-48	B
ENSG00000138495	1.92e-52	0.60028	0.548	0.283	3.88e-48	B
ENSG00000124802	2.15e-52	0.339436	0.222	0.068	4.34e-48	B
ENSG00000136718	3.24e-52	0.368257	0.264	0.089	6.55e-48	B
ENSG00000117448	3.65e-52	0.420062	0.337	0.129	7.39e-48	B
ENSG00000041357	1.43e-51	0.64358	0.559	0.296	2.9e-47	B
ENSG00000073849	1.54e-51	0.406024	0.194	0.056	3.12e-47	B
ENSG00000070961	1.61e-51	0.361449	0.233	0.074	3.26e-47	B
ENSG00000160818	2.3e-51	0.298625	0.2	0.058	4.65e-47	B
ENSG00000091317	2.6e-51	0.4349	0.414	0.174	5.25e-47	B
ENSG00000165283	3.28e-51	0.424427	0.326	0.124	6.64e-47	B
ENSG00000131652	4.02e-51	0.267826	0.165	0.043	8.13e-47	B
ENSG00000075624	9.98e-51	0.710107	0.92	0.837	2.02e-46	B
ENSG00000110852	1.85e-50	-1.09629	0.278	0.519	3.74e-46	B
ENSG00000129534	2.62e-50	0.469255	0.245	0.083	5.31e-46	B
ENSG00000103274	4.91e-50	0.302092	0.165	0.044	9.95e-46	B
ENSG00000120992	4.92e-50	0.283136	0.2	0.059	9.96e-46	B
ENSG00000100100	6.73e-50	-1.04235	0.103	0.355	1.36e-45	B
ENSG00000198786	9.61e-50	0.574904	0.905	0.729	1.94e-45	B
ENSG00000137309	9.86e-50	0.303454	0.193	0.056	1.99e-45	B
ENSG00000166562	1.21e-49	0.639035	0.378	0.161	2.46e-45	B
ENSG00000111679	1.35e-49	0.39825	0.247	0.083	2.74e-45	B
ENSG00000106588	2.55e-49	0.649661	0.658	0.391	5.17e-45	B
ENSG00000072506	2.62e-49	0.322921	0.253	0.086	5.3e-45	B
ENSG00000130332	3.81e-49	0.602482	0.561	0.297	7.72e-45	B
ENSG00000104894	4.08e-49	0.850468	0.79	0.581	8.26e-45	B
ENSG00000077232	4.39e-49	0.308913	0.171	0.047	8.89e-45	B
ENSG00000089157	5.9e-49	0.436049	0.986	0.945	1.19e-44	B
ENSG00000067533	6.76e-49	0.271967	0.189	0.054	1.37e-44	B
ENSG00000100911	7.52e-49	0.652523	0.712	0.474	1.52e-44	B
ENSG00000115541	8e-49	0.843757	0.53	0.299	1.62e-44	B
ENSG00000117395	8.17e-49	0.297734	0.169	0.046	1.65e-44	B
ENSG00000169241	8.29e-49	0.40222	0.292	0.108	1.68e-44	B
ENSG00000139146	1.28e-48	0.389492	0.332	0.13	2.59e-44	B
ENSG00000085449	1.37e-48	0.310613	0.176	0.049	2.77e-44	B
ENSG00000198843	1.51e-48	0.503431	0.558	0.278	3.05e-44	B
ENSG00000181610	2.08e-48	0.309972	0.218	0.069	4.22e-44	B
ENSG00000133313	2.88e-48	0.404831	0.342	0.137	5.82e-44	B
ENSG00000099800	4.14e-48	0.441758	0.321	0.127	8.39e-44	B
ENSG00000067225	4.58e-48	0.624082	0.74	0.507	9.26e-44	B
ENSG00000178741	4.71e-48	0.256697	0.171	0.047	9.53e-44	B
ENSG00000010810	6.78e-48	-1.17931	0.049	0.278	1.37e-43	B
ENSG00000196262	7.52e-48	0.645686	0.823	0.67	1.52e-43	B
ENSG00000242372	8.38e-48	0.383655	0.321	0.125	1.69e-43	B
ENSG00000185608	8.65e-48	0.288429	0.221	0.07	1.75e-43	B
ENSG00000108061	8.95e-48	0.433816	0.347	0.142	1.81e-43	B
ENSG00000172785	1.04e-47	0.355304	0.217	0.07	2.1e-43	B
ENSG00000177889	1.36e-47	0.550354	0.44	0.207	2.75e-43	B
ENSG00000184009	2.38e-47	0.945785	0.734	0.571	4.82e-43	B
ENSG00000167747	5.21e-47	0.279871	0.207	0.064	1.05e-42	B
ENSG00000134419	5.63e-47	-0.306302	0.997	0.992	1.14e-42	B
ENSG00000163519	8.19e-47	-0.997099	0.013	0.23	1.66e-42	B
ENSG00000120306	1.14e-46	0.347579	0.245	0.085	2.3e-42	B
ENSG00000150753	1.42e-46	0.372988	0.227	0.076	2.87e-42	B
ENSG00000165502	1.51e-46	-0.475679	0.938	0.962	3.05e-42	B
ENSG00000100412	2.56e-46	0.304312	0.212	0.068	5.18e-42	B
ENSG00000112679	3.29e-46	0.303132	0.191	0.058	6.65e-42	B
ENSG00000161570	8.58e-46	-3.58239	0.162	0.37	1.74e-41	B
ENSG00000168028	8.71e-46	0.42299	0.995	0.943	1.76e-41	B
ENSG00000204220	1.61e-45	0.319539	0.279	0.102	3.26e-41	B
ENSG00000172081	2.63e-45	0.320649	0.204	0.065	5.32e-41	B
ENSG00000149084	3.7e-45	0.278457	0.146	0.038	7.5e-41	B
ENSG00000158517	7.78e-45	0.292882	0.112	0.025	1.57e-40	B
ENSG00000164611	8.61e-45	0.275723	0.155	0.042	1.74e-40	B
ENSG00000174748	1.07e-44	0.291714	0.996	0.992	2.17e-40	B
ENSG00000197747	1.2e-44	-0.913044	0.432	0.596	2.43e-40	B
ENSG00000088986	1.25e-44	0.501595	0.446	0.214	2.52e-40	B
ENSG00000156531	1.33e-44	0.288476	0.157	0.043	2.68e-40	B
ENSG00000100591	1.62e-44	0.271444	0.209	0.068	3.28e-40	B
ENSG00000102898	2.95e-44	0.36746	0.316	0.126	5.96e-40	B
ENSG00000119844	3.65e-44	0.33569	0.191	0.06	7.39e-40	B
ENSG00000152061	4.4e-44	0.566604	0.292	0.117	8.9e-40	B
ENSG00000079263	5.34e-44	0.411849	0.401	0.178	1.08e-39	B
ENSG00000147996	6.2e-44	0.323487	0.212	0.07	1.25e-39	B
ENSG00000111229	6.36e-44	0.547632	0.767	0.515	1.29e-39	B
ENSG00000162614	6.39e-44	0.464075	0.208	0.069	1.29e-39	B
ENSG00000054654	8.44e-44	-0.912309	0.324	0.536	1.71e-39	B
ENSG00000160602	3.02e-43	0.268675	0.109	0.024	6.1e-39	B
ENSG00000245164	3.48e-43	-0.97711	0.023	0.23	7.05e-39	B
ENSG00000178035	4.37e-43	0.578229	0.401	0.195	8.83e-39	B
ENSG00000102317	5.65e-43	0.559069	0.541	0.3	1.14e-38	B
ENSG00000198763	7.07e-43	0.444008	0.994	0.98	1.43e-38	B
ENSG00000168906	7.57e-43	0.298118	0.172	0.052	1.53e-38	B
ENSG00000240065	8.66e-43	0.505364	0.824	0.618	1.75e-38	B
ENSG00000156273	9.32e-43	0.31223	0.2	0.066	1.89e-38	B
ENSG00000172183	1.01e-42	0.622039	0.864	0.668	2.04e-38	B
ENSG00000186468	1.21e-42	0.299027	0.996	0.989	2.44e-38	B
ENSG00000002549	1.34e-42	0.533955	0.421	0.205	2.71e-38	B
ENSG00000105374	1.46e-42	-2.4858	0.068	0.278	2.95e-38	B
ENSG00000115271	1.99e-42	0.344599	0.19	0.061	4.04e-38	B
ENSG00000214113	2.49e-42	0.344142	0.245	0.089	5.03e-38	B
ENSG00000156482	2.55e-42	-0.315991	0.996	0.991	5.15e-38	B
ENSG00000126749	3.14e-42	0.274199	0.231	0.08	6.35e-38	B
ENSG00000163811	3.47e-42	0.303515	0.218	0.074	7.03e-38	B
ENSG00000122873	4.09e-42	0.284557	0.193	0.062	8.28e-38	B
ENSG00000070190	4.09e-42	0.338552	0.21	0.071	8.28e-38	B
ENSG00000106628	1.18e-41	0.263834	0.179	0.055	2.39e-37	B
ENSG00000112081	1.44e-41	0.578846	0.583	0.35	2.92e-37	B
ENSG00000175756	1.83e-41	0.421244	0.387	0.176	3.71e-37	B
ENSG00000081059	2.75e-41	-0.964917	0.144	0.356	5.57e-37	B
ENSG00000166197	2.84e-41	0.262121	0.18	0.056	5.75e-37	B
ENSG00000054148	4.9e-41	0.377587	0.394	0.179	9.92e-37	B
ENSG00000167088	5.1e-41	0.554551	0.433	0.218	1.03e-36	B
ENSG00000159388	5.93e-41	0.676264	0.488	0.259	1.2e-36	B
ENSG00000173660	5.99e-41	0.545424	0.741	0.506	1.21e-36	B
ENSG00000174851	7.8e-41	0.256938	0.21	0.071	1.58e-36	B
ENSG00000173145	8.57e-41	0.326638	0.152	0.044	1.73e-36	B
ENSG00000127884	1.8e-40	0.296887	0.233	0.084	3.65e-36	B
ENSG00000160856	3.39e-40	0.251557	0.104	0.023	6.86e-36	B
ENSG00000143641	4.89e-40	0.356199	0.136	0.037	9.9e-36	B
ENSG00000139618	4.91e-40	0.311568	0.143	0.041	9.94e-36	B
ENSG00000174547	6.33e-40	0.332961	0.303	0.123	1.28e-35	B
ENSG00000119335	7.13e-40	0.535612	0.469	0.243	1.44e-35	B
ENSG00000124151	8.51e-40	0.366297	0.261	0.101	1.72e-35	B
ENSG00000113732	1.08e-39	0.463709	0.703	0.436	2.19e-35	B
ENSG00000165389	1.41e-39	0.264738	0.163	0.05	2.86e-35	B
ENSG00000101901	1.65e-39	0.277463	0.191	0.063	3.34e-35	B
ENSG00000106399	2.44e-39	0.427326	0.345	0.153	4.94e-35	B
ENSG00000197756	2.73e-39	0.307236	0.999	0.991	5.53e-35	B
ENSG00000182899	3.93e-39	-0.30256	0.995	0.992	7.95e-35	B
ENSG00000136286	3.99e-39	0.279606	0.229	0.084	8.08e-35	B
ENSG00000108010	4.05e-39	0.290773	0.228	0.083	8.2e-35	B
ENSG00000196305	4.09e-39	0.288093	0.223	0.08	8.28e-35	B
ENSG00000271856	4.12e-39	0.268621	0.118	0.03	8.34e-35	B
ENSG00000166888	4.48e-39	0.36218	0.275	0.11	9.07e-35	B
ENSG00000005810	4.81e-39	0.393334	0.368	0.167	9.73e-35	B
ENSG00000119655	5.1e-39	0.394953	0.502	0.263	1.03e-34	B
ENSG00000212907	6.01e-39	0.522404	0.667	0.413	1.22e-34	B
ENSG00000182718	6.55e-39	0.282927	0.345	0.149	1.33e-34	B
ENSG00000111716	7.11e-39	-0.837845	0.522	0.63	1.44e-34	B
ENSG00000163938	9.62e-39	0.38303	0.281	0.114	1.95e-34	B
ENSG00000143013	1.07e-38	0.279578	0.228	0.083	2.17e-34	B
ENSG00000071082	1.74e-38	-0.294204	0.994	0.992	3.52e-34	B
ENSG00000133142	1.79e-38	0.309922	0.185	0.062	3.62e-34	B
ENSG00000128050	3.32e-38	0.299226	0.236	0.088	6.72e-34	B
ENSG00000156467	4.05e-38	-0.516898	0.862	0.865	8.19e-34	B
ENSG00000096080	4.5e-38	0.257983	0.205	0.072	9.1e-34	B
ENSG00000130755	8.52e-38	-0.748521	0.465	0.607	1.72e-33	B
ENSG00000100418	8.65e-38	0.254799	0.17	0.054	1.75e-33	B
ENSG00000173465	1.23e-37	0.267328	0.214	0.077	2.49e-33	B
ENSG00000143977	1.26e-37	0.517208	0.668	0.441	2.55e-33	B
ENSG00000126264	1.67e-37	-1.16214	0.096	0.294	3.37e-33	B
ENSG00000125753	1.78e-37	0.285832	0.213	0.077	3.59e-33	B
ENSG00000155115	5.59e-37	0.367154	0.357	0.163	1.13e-32	B
ENSG00000100097	7.38e-37	0.582123	0.521	0.294	1.49e-32	B
ENSG00000156171	8e-37	0.391998	0.256	0.104	1.62e-32	B
ENSG00000111775	8.4e-37	0.52373	0.702	0.48	1.7e-32	B
ENSG00000182117	8.96e-37	0.468185	0.568	0.334	1.81e-32	B
ENSG00000167553	9.23e-37	0.293492	0.199	0.071	1.87e-32	B
ENSG00000134809	9.43e-37	0.302594	0.3	0.126	1.91e-32	B
ENSG00000086061	1.25e-36	0.441347	0.48	0.255	2.53e-32	B
ENSG00000172586	1.35e-36	0.277999	0.259	0.103	2.73e-32	B
ENSG00000125148	1.48e-36	-1.8994	0.49	0.618	2.99e-32	B
ENSG00000123131	1.6e-36	0.26977	0.219	0.081	3.24e-32	B
ENSG00000124562	1.6e-36	0.334382	0.364	0.166	3.24e-32	B
ENSG00000198833	1.64e-36	0.348045	0.16	0.051	3.32e-32	B
ENSG00000086504	2.32e-36	0.273198	0.24	0.092	4.69e-32	B
ENSG00000111796	3.01e-36	-1.8492	0.013	0.189	6.09e-32	B
ENSG00000196072	3.41e-36	0.356781	0.33	0.148	6.9e-32	B
ENSG00000128626	3.46e-36	0.325252	0.311	0.134	7e-32	B
ENSG00000133321	3.82e-36	-0.94086	0.281	0.467	7.72e-32	B
ENSG00000100442	3.84e-36	0.267268	0.259	0.102	7.77e-32	B
ENSG00000132507	5.33e-36	0.549227	0.431	0.225	1.08e-31	B
ENSG00000181924	8.21e-36	0.293587	0.25	0.099	1.66e-31	B
ENSG00000080608	8.93e-36	0.256578	0.19	0.066	1.81e-31	B
ENSG00000111669	1.12e-35	0.493409	0.895	0.777	2.26e-31	B
ENSG00000116898	1.73e-35	0.28604	0.285	0.119	3.5e-31	B
ENSG00000130775	1.8e-35	0.283802	0.167	0.055	3.64e-31	B
ENSG00000110955	2.11e-35	0.421345	0.411	0.204	4.27e-31	B
ENSG00000103152	2.24e-35	0.271983	0.204	0.074	4.54e-31	B
ENSG00000174946	3.48e-35	-0.906359	0.015	0.188	7.04e-31	B
ENSG00000136682	4.1e-35	0.266696	0.179	0.061	8.3e-31	B
ENSG00000118418	4.77e-35	0.419203	0.441	0.224	9.64e-31	B
ENSG00000165672	6.52e-35	0.271923	0.243	0.096	1.32e-30	B
ENSG00000175334	7.29e-35	0.383283	0.403	0.195	1.47e-30	B
ENSG00000172922	8.52e-35	0.356135	0.354	0.163	1.72e-30	B
ENSG00000133935	8.94e-35	0.294403	0.246	0.097	1.81e-30	B
ENSG00000126067	9.5e-35	0.326872	0.3	0.131	1.92e-30	B
ENSG00000197540	1.08e-34	-0.901976	0.014	0.184	2.18e-30	B
ENSG00000183918	1.78e-34	-0.875327	0.011	0.18	3.61e-30	B
ENSG00000146731	2.42e-34	0.36809	0.309	0.139	4.9e-30	B
ENSG00000136950	5.36e-34	0.262687	0.274	0.114	1.08e-29	B
ENSG00000102172	6.19e-34	0.388892	0.289	0.127	1.25e-29	B
ENSG00000132963	6.66e-34	0.552792	0.629	0.41	1.35e-29	B
ENSG00000232956	7.8e-34	0.286304	0.248	0.101	1.58e-29	B
ENSG00000117280	8.84e-34	0.314811	0.318	0.142	1.79e-29	B
ENSG00000131795	9.43e-34	0.433403	0.607	0.363	1.91e-29	B
ENSG00000141101	9.64e-34	0.259087	0.243	0.097	1.95e-29	B
ENSG00000171314	9.74e-34	0.484584	0.611	0.385	1.97e-29	B
ENSG00000004455	1.23e-33	0.297333	0.253	0.105	2.5e-29	B
ENSG00000241553	1.24e-33	0.337189	0.403	0.198	2.5e-29	B
ENSG00000135446	1.34e-33	0.273155	0.175	0.061	2.71e-29	B
ENSG00000175482	1.35e-33	0.47246	0.474	0.257	2.73e-29	B
ENSG00000149273	1.44e-33	-0.250909	0.996	0.993	2.92e-29	B
ENSG00000175567	1.5e-33	0.455613	0.347	0.167	3.03e-29	B
ENSG00000136279	1.87e-33	0.332035	0.318	0.145	3.78e-29	B
ENSG00000172775	2.28e-33	0.266282	0.24	0.095	4.6e-29	B
ENSG00000065615	3.58e-33	0.270996	0.209	0.079	7.24e-29	B
ENSG00000233137	3.75e-33	0.330892	0.223	0.088	7.59e-29	B
ENSG00000188229	4.8e-33	0.327402	0.217	0.085	9.72e-29	B
ENSG00000213203	5.89e-33	-0.735536	0.008	0.168	1.19e-28	B
ENSG00000205352	5.94e-33	0.425691	0.638	0.395	1.2e-28	B
ENSG00000122644	7.03e-33	0.408671	0.165	0.057	1.42e-28	B
ENSG00000116489	9.43e-33	0.373153	0.479	0.251	1.91e-28	B
ENSG00000187239	1.79e-32	0.354772	0.412	0.207	3.62e-28	B
ENSG00000198692	1.86e-32	0.441777	0.265	0.117	3.76e-28	B
ENSG00000198840	2.07e-32	0.409467	0.994	0.977	4.19e-28	B
ENSG00000145649	3.62e-32	-1.57889	0.006	0.162	7.33e-28	B
ENSG00000100216	3.74e-32	0.388187	0.385	0.195	7.56e-28	B
ENSG00000102007	3.96e-32	0.429594	0.629	0.378	8.01e-28	B
ENSG00000155368	4.14e-32	0.450925	0.553	0.334	8.37e-28	B
ENSG00000183617	4.91e-32	0.341465	0.39	0.192	9.94e-28	B
ENSG00000057608	5.39e-32	0.420082	0.456	0.247	1.09e-27	B
ENSG00000249915	5.76e-32	0.301119	0.302	0.136	1.17e-27	B
ENSG00000151461	6.33e-32	0.418386	0.479	0.257	1.28e-27	B
ENSG00000264198	6.36e-32	0.295289	0.34	0.157	1.29e-27	B
ENSG00000034510	6.74e-32	0.304701	0.997	0.992	1.36e-27	B
ENSG00000235576	9.93e-32	-1.08051	0.006	0.16	2.01e-27	B
ENSG00000164924	1.05e-31	0.414716	0.624	0.37	2.12e-27	B
ENSG00000156587	1.09e-31	0.427939	0.651	0.423	2.2e-27	B
ENSG00000133561	1.34e-31	-0.753091	0.011	0.167	2.71e-27	B
ENSG00000132780	1.35e-31	0.293446	0.284	0.124	2.73e-27	B
ENSG00000162654	1.5e-31	0.505498	0.492	0.279	3.03e-27	B
ENSG00000151247	1.58e-31	0.255868	0.288	0.126	3.19e-27	B
ENSG00000182004	2.02e-31	0.492193	0.518	0.316	4.08e-27	B
ENSG00000213064	2.6e-31	0.27463	0.177	0.065	5.26e-27	B
ENSG00000172809	3.72e-31	-0.31683	0.992	0.979	7.54e-27	B
ENSG00000145354	4.15e-31	0.339872	0.349	0.169	8.4e-27	B
ENSG00000079459	4.41e-31	0.296412	0.233	0.096	8.91e-27	B
ENSG00000064393	8.78e-31	0.292139	0.151	0.051	1.78e-26	B
ENSG00000008324	1.13e-30	0.32565	0.408	0.206	2.3e-26	B
ENSG00000167642	1.52e-30	0.333851	0.128	0.041	3.07e-26	B
ENSG00000115053	1.56e-30	0.611469	0.605	0.414	3.17e-26	B
ENSG00000198015	1.57e-30	0.262867	0.222	0.09	3.18e-26	B
ENSG00000196683	2.4e-30	-0.410753	0.916	0.901	4.86e-26	B
ENSG00000226976	2.8e-30	0.26192	0.253	0.107	5.66e-26	B
ENSG00000129084	2.84e-30	0.428886	0.458	0.257	5.75e-26	B
ENSG00000118181	3e-30	-0.253404	0.997	0.992	6.06e-26	B
ENSG00000154832	3.16e-30	0.265141	0.181	0.067	6.4e-26	B
ENSG00000138593	3.32e-30	0.346515	0.17	0.063	6.71e-26	B
ENSG00000108294	3.43e-30	0.404921	0.466	0.259	6.93e-26	B
ENSG00000111846	3.54e-30	0.27106	0.118	0.035	7.17e-26	B
ENSG00000111145	3.91e-30	0.316461	0.184	0.07	7.91e-26	B
ENSG00000175768	4.51e-30	0.266664	0.257	0.111	9.12e-26	B
ENSG00000111639	4.77e-30	0.344942	0.421	0.222	9.66e-26	B
ENSG00000107833	4.97e-30	0.311538	0.19	0.074	1.01e-25	B
ENSG00000136603	4.98e-30	0.337449	0.251	0.109	1.01e-25	B
ENSG00000100387	6.65e-30	0.383685	0.624	0.379	1.35e-25	B
ENSG00000160410	7.93e-30	0.2702	0.25	0.107	1.61e-25	B
ENSG00000089327	8.45e-30	-0.5977	0.638	0.684	1.71e-25	B
ENSG00000129071	1.13e-29	0.306886	0.312	0.147	2.28e-25	B
ENSG00000100129	1.33e-29	0.445497	0.601	0.375	2.68e-25	B
ENSG00000004779	1.52e-29	0.340977	0.356	0.176	3.08e-25	B
ENSG00000136930	2.04e-29	0.33555	0.379	0.193	4.13e-25	B
ENSG00000132842	2.12e-29	0.335075	0.176	0.067	4.29e-25	B
ENSG00000102879	2.23e-29	0.536785	0.638	0.428	4.52e-25	B
ENSG00000133106	2.56e-29	0.435997	0.632	0.412	5.18e-25	B
ENSG00000172115	2.57e-29	0.467524	0.535	0.325	5.2e-25	B
ENSG00000168175	2.77e-29	0.298614	0.316	0.15	5.61e-25	B
ENSG00000113263	2.92e-29	-0.713103	0.019	0.168	5.9e-25	B
ENSG00000108953	2.92e-29	0.365223	0.37	0.189	5.9e-25	B
ENSG00000112110	3.12e-29	0.284703	0.27	0.121	6.32e-25	B
ENSG00000110031	3.9e-29	0.275377	0.279	0.126	7.9e-25	B
ENSG00000128891	4.11e-29	0.253355	0.174	0.065	8.33e-25	B
ENSG00000127152	5.21e-29	-0.680079	0.008	0.15	1.05e-24	B
ENSG00000172116	5.39e-29	-1.00668	0.005	0.146	1.09e-24	B
ENSG00000230989	7.4e-29	0.271446	0.294	0.136	1.5e-24	B
ENSG00000133983	8.62e-29	0.351346	0.437	0.232	1.74e-24	B
ENSG00000173674	8.66e-29	0.373746	0.464	0.258	1.75e-24	B
ENSG00000144381	8.88e-29	0.546933	0.393	0.222	1.8e-24	B
ENSG00000110321	1.02e-28	0.382686	0.54	0.317	2.06e-24	B
ENSG00000065978	1.03e-28	0.381931	0.357	0.185	2.09e-24	B
ENSG00000143333	1.19e-28	0.311287	0.11	0.033	2.4e-24	B
ENSG00000240972	1.39e-28	0.456052	0.831	0.688	2.81e-24	B
ENSG00000157500	1.75e-28	0.274657	0.139	0.047	3.54e-24	B
ENSG00000122566	2.09e-28	0.414258	0.689	0.486	4.24e-24	B
ENSG00000159720	2.73e-28	0.253565	0.191	0.076	5.53e-24	B
ENSG00000148303	2.85e-28	0.287844	0.995	0.974	5.77e-24	B
ENSG00000165732	3.81e-28	0.505666	0.431	0.249	7.71e-24	B
ENSG00000196684	4.75e-28	0.272633	0.261	0.117	9.61e-24	B
ENSG00000215845	7.46e-28	0.383733	0.471	0.268	1.51e-23	B
ENSG00000169136	9.52e-28	0.502878	0.171	0.066	1.93e-23	B
ENSG00000172053	1.16e-27	0.266631	0.255	0.113	2.34e-23	B
ENSG00000164167	1.7e-27	0.290021	0.384	0.197	3.45e-23	B
ENSG00000092010	2.1e-27	0.39716	0.823	0.651	4.24e-23	B
ENSG00000134056	2.22e-27	0.267607	0.317	0.153	4.49e-23	B
ENSG00000130592	2.26e-27	0.311239	0.569	0.338	4.58e-23	B
ENSG00000086666	2.27e-27	0.270761	0.321	0.156	4.6e-23	B
ENSG00000188042	2.32e-27	-0.791001	0.07	0.227	4.69e-23	B
ENSG00000087074	2.66e-27	0.327287	0.295	0.143	5.38e-23	B
ENSG00000177879	3.01e-27	0.372629	0.416	0.226	6.09e-23	B
ENSG00000178952	3.26e-27	0.329886	0.383	0.201	6.59e-23	B
ENSG00000106591	3.29e-27	0.265257	0.262	0.118	6.66e-23	B
ENSG00000015475	4.04e-27	0.321967	0.2	0.084	8.17e-23	B
ENSG00000011600	4.16e-27	-1.82866	0.041	0.187	8.41e-23	B
ENSG00000154518	5.46e-27	0.443542	0.544	0.346	1.1e-22	B
ENSG00000125944	5.73e-27	0.303096	0.365	0.189	1.16e-22	B
ENSG00000113407	6.81e-27	0.265693	0.229	0.1	1.38e-22	B
ENSG00000179262	7.53e-27	0.325651	0.473	0.266	1.52e-22	B
ENSG00000140307	7.67e-27	0.278361	0.373	0.191	1.55e-22	B
ENSG00000138035	7.82e-27	0.336104	0.338	0.172	1.58e-22	B
ENSG00000143420	9.04e-27	0.361089	0.506	0.293	1.83e-22	B
ENSG00000171863	1.54e-26	0.264386	0.994	0.978	3.11e-22	B
ENSG00000130706	1.77e-26	0.274972	0.298	0.143	3.59e-22	B
ENSG00000205246	2.25e-26	0.405769	0.817	0.678	4.55e-22	B
ENSG00000172757	2.35e-26	0.418185	0.844	0.727	4.76e-22	B
ENSG00000198830	2.89e-26	0.360258	0.66	0.442	5.84e-22	B
ENSG00000075142	4.78e-26	0.323976	0.446	0.247	9.68e-22	B
ENSG00000067064	5.66e-26	0.298067	0.354	0.182	1.14e-21	B
ENSG00000005022	6.41e-26	0.460452	0.494	0.314	1.3e-21	B
ENSG00000130303	7.69e-26	0.34301	0.629	0.414	1.56e-21	B
ENSG00000213585	7.85e-26	0.343736	0.437	0.245	1.59e-21	B
ENSG00000138326	8.3e-26	0.283188	0.992	0.985	1.68e-21	B
ENSG00000010404	1.07e-25	0.338062	0.413	0.228	2.16e-21	B
ENSG00000130429	1.11e-25	0.420199	0.592	0.39	2.24e-21	B
ENSG00000198106	1.35e-25	0.377501	0.113	0.037	2.73e-21	B
ENSG00000164405	1.56e-25	0.467885	0.513	0.333	3.15e-21	B
ENSG00000196230	1.64e-25	0.523029	0.55	0.375	3.33e-21	B
ENSG00000119705	1.91e-25	0.425183	0.414	0.239	3.87e-21	B
ENSG00000113387	2.07e-25	0.632479	0.763	0.68	4.19e-21	B
ENSG00000163564	2.08e-25	-0.923705	0.074	0.223	4.2e-21	B
ENSG00000088832	2.15e-25	0.370602	0.461	0.272	4.35e-21	B
ENSG00000115523	2.34e-25	-3.90705	0.171	0.311	4.74e-21	B
ENSG00000078304	2.57e-25	-0.791491	0.286	0.425	5.2e-21	B
ENSG00000170860	2.6e-25	0.32133	0.44	0.246	5.27e-21	B
ENSG00000138795	3.5e-25	-0.589145	0.005	0.129	7.08e-21	B
ENSG00000149357	3.75e-25	0.256681	0.416	0.222	7.58e-21	B
ENSG00000166405	4.09e-25	0.283404	0.212	0.092	8.27e-21	B
ENSG00000147905	4.48e-25	0.270082	0.184	0.076	9.06e-21	B
ENSG00000090266	4.82e-25	0.358819	0.561	0.355	9.76e-21	B
ENSG00000174021	5.91e-25	0.362533	0.634	0.423	1.2e-20	B
ENSG00000142507	6.1e-25	0.305919	0.425	0.236	1.24e-20	B
ENSG00000166750	6.67e-25	-0.800661	0.204	0.355	1.35e-20	B
ENSG00000111863	6.68e-25	-0.702006	0.025	0.159	1.35e-20	B
ENSG00000143933	1.02e-24	0.399032	0.717	0.533	2.06e-20	B
ENSG00000106244	1.14e-24	0.3156	0.387	0.211	2.31e-20	B
ENSG00000153048	1.18e-24	0.265882	0.317	0.159	2.4e-20	B
ENSG00000116288	1.24e-24	0.346271	0.586	0.367	2.51e-20	B
ENSG00000163468	1.27e-24	0.306426	0.362	0.192	2.57e-20	B
ENSG00000114942	1.41e-24	0.311822	0.953	0.859	2.84e-20	B
ENSG00000134539	2.13e-24	-1.12317	0.015	0.141	4.32e-20	B
ENSG00000225783	3.01e-24	-0.844852	0.075	0.218	6.08e-20	B
ENSG00000205937	3.14e-24	0.300911	0.425	0.236	6.35e-20	B
ENSG00000110934	3.15e-24	-0.780859	0.118	0.266	6.37e-20	B
ENSG00000046651	5.31e-24	0.347008	0.409	0.229	1.07e-19	B
ENSG00000204387	5.34e-24	-0.577872	0.561	0.635	1.08e-19	B
ENSG00000111640	5.7e-24	0.287094	0.966	0.927	1.15e-19	B
ENSG00000152495	6.46e-24	-0.598288	0.02	0.147	1.31e-19	B
ENSG00000170043	9.36e-24	0.300443	0.511	0.302	1.89e-19	B
ENSG00000182463	9.82e-24	-1.03873	0.136	0.278	1.99e-19	B
ENSG00000172543	1.07e-23	-0.893617	0.015	0.139	2.16e-19	B
ENSG00000162511	1.11e-23	0.57001	0.8	0.624	2.25e-19	B
ENSG00000168961	1.2e-23	0.314283	0.283	0.142	2.43e-19	B
ENSG00000125977	1.22e-23	0.391103	0.589	0.387	2.46e-19	B
ENSG00000099783	1.42e-23	0.26206	0.33	0.17	2.87e-19	B
ENSG00000143549	1.91e-23	0.395589	0.669	0.476	3.86e-19	B
ENSG00000180992	2.64e-23	0.282804	0.409	0.226	5.35e-19	B
ENSG00000125995	4.35e-23	0.300657	0.455	0.263	8.79e-19	B
ENSG00000085719	5.87e-23	0.263669	0.212	0.096	1.19e-18	B
ENSG00000139679	6.65e-23	-0.59404	0.006	0.121	1.35e-18	B
ENSG00000171425	8.85e-23	0.330488	0.267	0.134	1.79e-18	B
ENSG00000106153	9.07e-23	0.427293	0.766	0.659	1.84e-18	B
ENSG00000084207	9.76e-23	0.407997	0.464	0.287	1.98e-18	B
ENSG00000100632	1.23e-22	0.38179	0.561	0.373	2.48e-18	B
ENSG00000135916	1.32e-22	0.253879	0.129	0.048	2.67e-18	B
ENSG00000143256	1.39e-22	0.299742	0.352	0.192	2.82e-18	B
ENSG00000115687	2.61e-22	-0.952626	0.095	0.23	5.29e-18	B
ENSG00000265206	3.23e-22	0.355012	0.542	0.345	6.53e-18	B
ENSG00000163600	5.02e-22	-0.551674	0.006	0.117	1.02e-17	B
ENSG00000141552	5.99e-22	0.259869	0.426	0.242	1.21e-17	B
ENSG00000089220	6.24e-22	0.344012	0.508	0.317	1.26e-17	B
ENSG00000075415	7.25e-22	0.354582	0.513	0.324	1.47e-17	B
ENSG00000136560	8.16e-22	0.281749	0.407	0.229	1.65e-17	B
ENSG00000185201	8.23e-22	0.441481	0.75	0.596	1.67e-17	B
ENSG00000115738	9.69e-22	-0.997332	0.091	0.229	1.96e-17	B
ENSG00000237945	9.7e-22	-0.601346	0.018	0.133	1.96e-17	B
ENSG00000111678	9.95e-22	-0.70587	0.271	0.396	2.01e-17	B
ENSG00000111144	1.01e-21	0.265063	0.227	0.108	2.05e-17	B
ENSG00000112576	1.13e-21	-0.638891	0.079	0.215	2.28e-17	B
ENSG00000099795	1.15e-21	0.257782	0.463	0.271	2.33e-17	B
ENSG00000174917	1.16e-21	0.304149	0.445	0.264	2.34e-17	B
ENSG00000173875	1.24e-21	0.328813	0.271	0.139	2.52e-17	B
ENSG00000027075	1.31e-21	-0.629478	0.02	0.136	2.65e-17	B
ENSG00000085231	1.57e-21	0.271142	0.369	0.204	3.18e-17	B
ENSG00000115977	1.61e-21	-0.58145	0.014	0.126	3.25e-17	B
ENSG00000197903	1.8e-21	0.265657	0.188	0.084	3.65e-17	B
ENSG00000124831	1.95e-21	0.279025	0.421	0.24	3.94e-17	B
ENSG00000145494	2.08e-21	0.295827	0.411	0.238	4.21e-17	B
ENSG00000180644	2.42e-21	-1.26618	0.032	0.15	4.9e-17	B
ENSG00000163840	2.99e-21	0.252272	0.285	0.147	6.05e-17	B
ENSG00000128272	3.13e-21	0.343361	0.484	0.306	6.33e-17	B
ENSG00000153283	3.43e-21	-0.688801	0.065	0.193	6.94e-17	B
ENSG00000164483	3.65e-21	-0.771949	0.011	0.121	7.39e-17	B
ENSG00000100138	4.76e-21	0.387196	0.573	0.389	9.62e-17	B
ENSG00000074706	5.45e-21	-0.58708	0.02	0.134	1.1e-16	B
ENSG00000204264	7e-21	0.283576	0.71	0.51	1.42e-16	B
ENSG00000160310	7.39e-21	-0.729308	0.278	0.392	1.5e-16	B
ENSG00000186918	8.94e-21	0.251553	0.123	0.047	1.81e-16	B
ENSG00000089009	9.62e-21	0.279666	0.992	0.971	1.95e-16	B
ENSG00000162704	1.02e-20	0.333471	0.58	0.377	2.07e-16	B
ENSG00000100823	1.07e-20	0.275193	0.352	0.195	2.17e-16	B
ENSG00000169442	1.18e-20	0.318478	0.754	0.548	2.39e-16	B
ENSG00000139343	1.35e-20	0.335024	0.483	0.305	2.72e-16	B
ENSG00000185507	1.46e-20	0.365398	0.383	0.225	2.95e-16	B
ENSG00000246223	1.79e-20	-0.495907	0.009	0.114	3.63e-16	B
ENSG00000205220	2.72e-20	0.302812	0.474	0.288	5.51e-16	B
ENSG00000165929	2.94e-20	-0.526613	0.015	0.123	5.94e-16	B
ENSG00000171988	4.17e-20	0.266371	0.345	0.193	8.44e-16	B
ENSG00000242485	4.27e-20	0.283973	0.414	0.242	8.64e-16	B
ENSG00000188313	7.13e-20	0.362081	0.458	0.285	1.44e-15	B
ENSG00000185947	8.12e-20	0.291318	0.351	0.199	1.64e-15	B
ENSG00000164674	9.76e-20	-0.901138	0.081	0.202	1.98e-15	B
ENSG00000158985	1.18e-19	-0.569809	0.489	0.56	2.39e-15	B
ENSG00000149925	1.5e-19	0.3339	0.821	0.717	3.03e-15	B
ENSG00000107742	2.65e-19	-0.56601	0.053	0.173	5.35e-15	B
ENSG00000135185	2.97e-19	0.279687	0.426	0.248	6e-15	B
ENSG00000167658	3.12e-19	0.310162	0.948	0.846	6.32e-15	B
ENSG00000122643	3.47e-19	0.498185	0.515	0.351	7.03e-15	B
ENSG00000131171	3.61e-19	0.270695	0.478	0.289	7.31e-15	B
ENSG00000147274	3.68e-19	0.326321	0.525	0.338	7.45e-15	B
ENSG00000140319	5.02e-19	0.272353	0.85	0.736	1.01e-14	B
ENSG00000172005	5.02e-19	-0.478182	0.01	0.109	1.02e-14	B
ENSG00000158869	6.39e-19	-1.83033	0.047	0.158	1.29e-14	B
ENSG00000168394	8.24e-19	0.280415	0.504	0.319	1.67e-14	B
ENSG00000122862	9.09e-19	-0.860341	0.548	0.606	1.84e-14	B
ENSG00000178913	1.36e-18	0.263019	0.503	0.314	2.76e-14	B
ENSG00000163328	1.64e-18	-0.587112	0.076	0.201	3.31e-14	B
ENSG00000120533	1.85e-18	0.255169	0.473	0.289	3.74e-14	B
ENSG00000198727	2.17e-18	0.311856	0.985	0.953	4.39e-14	B
ENSG00000105669	2.34e-18	0.287387	0.502	0.317	4.73e-14	B
ENSG00000154723	2.53e-18	0.315531	0.531	0.354	5.13e-14	B
ENSG00000186010	2.73e-18	0.291779	0.61	0.422	5.53e-14	B
ENSG00000070081	2.84e-18	-0.561035	0.049	0.163	5.75e-14	B
ENSG00000173113	3.01e-18	0.3289	0.617	0.434	6.1e-14	B
ENSG00000241468	3.61e-18	0.299993	0.531	0.354	7.31e-14	B
ENSG00000074966	4.75e-18	-0.565261	0.013	0.108	9.61e-14	B
ENSG00000115128	6.21e-18	0.250887	0.468	0.286	1.26e-13	B
ENSG00000128340	9.58e-18	0.342718	0.578	0.403	1.94e-13	B
ENSG00000170144	9.63e-18	0.262566	0.506	0.326	1.95e-13	B
ENSG00000244754	1.16e-17	-0.391796	0.706	0.725	2.35e-13	B
ENSG00000165637	1.19e-17	0.290336	0.468	0.294	2.4e-13	B
ENSG00000105185	1.45e-17	0.270703	0.322	0.184	2.93e-13	B
ENSG00000131174	2.09e-17	0.305827	0.606	0.435	4.23e-13	B
ENSG00000164919	2.27e-17	0.299452	0.693	0.528	4.59e-13	B
ENSG00000135245	2.7e-17	0.253694	0.155	0.07	5.46e-13	B
ENSG00000135899	3.29e-17	0.258029	0.636	0.425	6.65e-13	B
ENSG00000160593	3.48e-17	-0.492445	0.011	0.102	7.04e-13	B
ENSG00000197471	5.47e-17	-0.589093	0.042	0.145	1.11e-12	B
ENSG00000189043	5.87e-17	0.336244	0.65	0.506	1.19e-12	B
ENSG00000026508	7.14e-17	-0.650018	0.508	0.564	1.44e-12	B
ENSG00000158417	7.96e-17	0.311578	0.503	0.335	1.61e-12	B
ENSG00000145675	8.82e-17	-0.616483	0.035	0.135	1.79e-12	B
ENSG00000101182	1.03e-16	0.310956	0.548	0.378	2.07e-12	B
ENSG00000132965	1.17e-16	-0.831443	0.157	0.275	2.37e-12	B
ENSG00000071073	1.35e-16	-0.5423	0.047	0.149	2.73e-12	B
ENSG00000038219	1.36e-16	0.252249	0.205	0.105	2.75e-12	B
ENSG00000100351	1.64e-16	-0.538051	0.032	0.128	3.31e-12	B
ENSG00000068079	2.9e-16	0.266354	0.475	0.308	5.87e-12	B
ENSG00000273445	4.45e-16	-0.575993	0.019	0.108	9.01e-12	B
ENSG00000078596	6.63e-16	-0.496809	0.038	0.136	1.34e-11	B
ENSG00000163346	7.43e-16	-0.510734	0.066	0.173	1.5e-11	B
ENSG00000163644	8.49e-16	0.272994	0.492	0.324	1.72e-11	B
ENSG00000135940	8.85e-16	0.258137	0.697	0.536	1.79e-11	B
ENSG00000008018	1.46e-15	0.259761	0.506	0.334	2.95e-11	B
ENSG00000100453	1.61e-15	-2.52867	0.096	0.198	3.26e-11	B
ENSG00000172575	1.79e-15	-0.591793	0.061	0.16	3.62e-11	B
ENSG00000137193	1.83e-15	-0.589488	0.072	0.176	3.69e-11	B
ENSG00000112695	3.21e-15	0.264472	0.747	0.625	6.49e-11	B
ENSG00000177409	3.3e-15	0.324563	0.572	0.405	6.67e-11	B
ENSG00000163041	3.52e-15	0.258276	0.858	0.744	7.13e-11	B
ENSG00000130522	4.37e-15	0.297	0.219	0.119	8.85e-11	B
ENSG00000106803	4.72e-15	0.263405	0.653	0.492	9.55e-11	B
ENSG00000090104	5.03e-15	-1.22856	0.185	0.289	1.02e-10	B
ENSG00000113448	5.87e-15	-0.547657	0.057	0.157	1.19e-10	B
ENSG00000104964	1.49e-14	-0.579182	0.26	0.353	3.02e-10	B
ENSG00000090554	1.96e-14	-0.44137	0.032	0.119	3.98e-10	B
ENSG00000138378	2.04e-14	-0.558034	0.068	0.167	4.14e-10	B
ENSG00000163466	2.18e-14	0.286368	0.796	0.704	4.4e-10	B
ENSG00000152795	2.19e-14	0.283182	0.606	0.436	4.44e-10	B
ENSG00000155926	2.21e-14	-0.637599	0.06	0.154	4.47e-10	B
ENSG00000254999	2.26e-14	0.251917	0.619	0.446	4.58e-10	B
ENSG00000140988	2.89e-14	0.328861	0.817	0.7	5.85e-10	B
ENSG00000101347	4.86e-14	-0.588819	0.114	0.213	9.84e-10	B
ENSG00000164032	7.36e-14	0.279215	0.646	0.498	1.49e-09	B
ENSG00000129277	7.6e-14	-2.87948	0.176	0.27	1.54e-09	B
ENSG00000043462	1e-13	-0.446733	0.034	0.119	2.03e-09	B
ENSG00000182568	1.71e-13	-0.430536	0.037	0.122	3.45e-09	B
ENSG00000177721	2.04e-13	-0.520312	0.179	0.284	4.12e-09	B
ENSG00000196141	2.06e-13	-0.530075	0.044	0.13	4.18e-09	B
ENSG00000135486	2.84e-13	0.404435	0.9	0.851	5.75e-09	B
ENSG00000183696	2.92e-13	-0.600249	0.09	0.183	5.91e-09	B
ENSG00000148908	6.15e-13	-0.59319	0.289	0.361	1.24e-08	B
ENSG00000142864	1.12e-12	0.311087	0.586	0.444	2.27e-08	B
ENSG00000114850	5.82e-12	0.343994	0.308	0.196	1.18e-07	B
ENSG00000198931	6.85e-12	0.283404	0.584	0.456	1.39e-07	B
ENSG00000145287	8.13e-12	0.463483	0.559	0.446	1.65e-07	B
ENSG00000153250	8.76e-12	-0.403169	0.037	0.113	1.77e-07	B
ENSG00000149311	9.12e-12	-0.547844	0.256	0.342	1.85e-07	B
ENSG00000110848	1.09e-11	0.555965	0.493	0.354	2.2e-07	B
ENSG00000163479	1.14e-11	-0.379059	0.564	0.594	2.31e-07	B
ENSG00000113328	3.04e-11	-0.519313	0.237	0.316	6.16e-07	B
ENSG00000145220	5.86e-11	-0.979997	0.124	0.201	1.19e-06	B
ENSG00000178980	7.86e-11	-0.508131	0.157	0.24	1.59e-06	B
ENSG00000181896	1.21e-10	-0.435218	0.103	0.189	2.45e-06	B
ENSG00000065357	1.61e-10	-0.422111	0.065	0.14	3.25e-06	B
ENSG00000136732	1.83e-10	-0.452973	0.442	0.493	3.69e-06	B
ENSG00000181847	1.87e-10	-0.616025	0.043	0.112	3.78e-06	B
ENSG00000070718	1.99e-10	-0.415774	0.044	0.115	4.02e-06	B
ENSG00000126860	2.28e-10	-0.534839	0.247	0.324	4.61e-06	B
ENSG00000027869	2.65e-10	-0.558589	0.047	0.116	5.36e-06	B
ENSG00000141480	4.79e-10	-0.489006	0.085	0.16	9.69e-06	B
ENSG00000182957	6.35e-10	-0.44868	0.054	0.123	1.29e-05	B
ENSG00000068796	6.84e-10	-0.479465	0.103	0.178	1.38e-05	B
ENSG00000135426	1.27e-09	-0.424197	0.056	0.123	2.57e-05	B
ENSG00000171476	1.35e-09	-0.798999	0.056	0.123	2.73e-05	B
ENSG00000137642	1.71e-09	-0.369289	0.06	0.133	3.46e-05	B
ENSG00000059588	4.75e-09	-0.535906	0.065	0.131	9.62e-05	B
ENSG00000254682	6.09e-09	-0.389096	0.052	0.115	0.000123299	B
ENSG00000136156	7.95e-09	-0.389291	0.077	0.147	0.000160785	B
ENSG00000169764	9.88e-09	-0.439332	0.267	0.331	0.000199899	B
ENSG00000102265	1.07e-08	-0.643879	0.076	0.144	0.000216619	B
ENSG00000141293	1.29e-08	-0.400573	0.06	0.124	0.000261496	B
ENSG00000125868	1.6e-08	-0.513138	0.177	0.244	0.000324345	B
ENSG00000150593	1.64e-08	-0.481712	0.241	0.305	0.000332879	B
ENSG00000143669	1.7e-08	-0.590571	0.084	0.148	0.000343046	B
ENSG00000136810	1.79e-08	-0.413114	0.445	0.332	0.000362838	B
ENSG00000204397	2.03e-08	-0.575688	0.226	0.291	0.0004103	B
ENSG00000116977	2.91e-08	-0.386629	0.109	0.178	0.000589615	B
ENSG00000197956	4.04e-08	-0.497382	0.701	0.723	0.000817905	B
ENSG00000187118	5.83e-08	-1.73131	0.17	0.222	0.00117926	B
ENSG00000127084	5.95e-08	-0.340332	0.053	0.113	0.001204	B
ENSG00000137331	7.24e-08	-0.787395	0.048	0.104	0.00146486	B
ENSG00000196405	7.27e-08	-0.320306	0.556	0.583	0.00147065	B
ENSG00000161960	7.78e-08	0.281753	0.579	0.48	0.00157441	B
ENSG00000099797	7.79e-08	-0.438065	0.162	0.227	0.00157643	B
ENSG00000198668	8.3e-08	-0.416273	0.52	0.519	0.0016791	B
ENSG00000185811	8.57e-08	-0.405729	0.166	0.233	0.00173381	B
ENSG00000142546	1.36e-07	-0.550985	0.237	0.288	0.00275348	B
ENSG00000167996	1.42e-07	-1.63452	0.517	0.501	0.00287504	B
ENSG00000171843	1.9e-07	-0.373399	0.085	0.147	0.00385038	B
ENSG00000104408	3.18e-07	-0.282773	0.817	0.766	0.00643145	B
ENSG00000185088	3.97e-07	-0.466662	0.379	0.415	0.00802927	B
ENSG00000111537	4.93e-07	-3.53908	0.06	0.112	0.00997493	B
ENSG00000173821	4.98e-07	-0.427157	0.591	0.609	0.0100683	B
ENSG00000179010	4.98e-07	-0.453088	0.241	0.291	0.0100816	B
ENSG00000108219	8.37e-07	-0.29642	0.052	0.104	0.0169438	B
ENSG00000117226	8.52e-07	-0.399232	0.086	0.142	0.0172432	B
ENSG00000101608	8.97e-07	0.258591	0.779	0.681	0.0181496	B
ENSG00000122417	1.03e-06	-0.486892	0.284	0.335	0.0207506	B
ENSG00000267100	1.17e-06	-0.3986	0.191	0.252	0.0237007	B
ENSG00000166920	1.56e-06	-1.90362	0.094	0.149	0.0316575	B
ENSG00000164466	1.57e-06	-0.403003	0.138	0.195	0.0316764	B
ENSG00000106733	1.82e-06	-0.419249	0.12	0.174	0.0369014	B
ENSG00000182463.1	0	1.68891	0.412	0.047	0	CD4+_T
ENSG00000070756.1	0	1.66724	0.964	0.744	0	CD4+_T
ENSG00000111716.1	0	1.1605	0.779	0.38	0	CD4+_T
ENSG00000133872.1	0	1.0691	0.899	0.605	0	CD4+_T
ENSG00000144713	0	0.900073	1	0.989	0	CD4+_T
ENSG00000110700	0	0.89025	0.998	0.969	0	CD4+_T
ENSG00000109475.1	0	0.888541	0.999	0.991	0	CD4+_T
ENSG00000104408.1	0	0.878865	0.878	0.595	0	CD4+_T
ENSG00000167526	0	0.873591	0.997	0.932	0	CD4+_T
ENSG00000116251	0	0.832679	0.991	0.886	0	CD4+_T
ENSG00000231500	0	0.825	0.999	0.982	0	CD4+_T
ENSG00000137154	0	0.815303	0.999	0.986	0	CD4+_T
ENSG00000163682	0	0.81111	0.998	0.975	0	CD4+_T
ENSG00000181163	0	0.809163	0.944	0.736	0	CD4+_T
ENSG00000112306	0	0.794787	1	0.989	0	CD4+_T
ENSG00000145425	0	0.782866	0.999	0.979	0	CD4+_T
ENSG00000142676	0	0.782861	0.999	0.985	0	CD4+_T
ENSG00000156482.1	0	0.778021	0.999	0.98	0	CD4+_T
ENSG00000198918	0	0.759109	0.999	0.988	0	CD4+_T
ENSG00000118181.1	0	0.758851	0.999	0.981	0	CD4+_T
ENSG00000100316	0	0.758783	0.999	0.977	0	CD4+_T
ENSG00000126353	0	0.749859	0.627	0.28	0	CD4+_T
ENSG00000130255	0	0.748823	0.998	0.973	0	CD4+_T
ENSG00000114942.1	0	0.745631	0.942	0.741	0	CD4+_T
ENSG00000105193	0	0.744396	0.998	0.975	0	CD4+_T
ENSG00000179144.1	0	0.73513	0.784	0.436	0	CD4+_T
ENSG00000134419.1	0	0.734592	0.999	0.982	0	CD4+_T
ENSG00000142937.1	0	0.732602	0.998	0.976	0	CD4+_T
ENSG00000172809.1	0	0.727887	0.996	0.954	0	CD4+_T
ENSG00000122026	0	0.693703	1	0.994	0	CD4+_T
ENSG00000213741	0	0.692406	0.999	0.992	0	CD4+_T
ENSG00000177600	0	0.690851	0.999	0.991	0	CD4+_T
ENSG00000182899.1	0	0.678	0.999	0.981	0	CD4+_T
ENSG00000071082.1	0	0.673864	0.998	0.982	0	CD4+_T
ENSG00000197958	0	0.673197	0.995	0.969	0	CD4+_T
ENSG00000083845.1	0	0.664423	0.991	0.912	0	CD4+_T
ENSG00000108298	0	0.660155	0.999	0.986	0	CD4+_T
ENSG00000063177	0	0.651464	0.998	0.968	0	CD4+_T
ENSG00000164587	0	0.643252	1	0.99	0	CD4+_T
ENSG00000174444	0	0.636511	0.973	0.839	0	CD4+_T
ENSG00000198755	0	0.629046	0.983	0.89	0	CD4+_T
ENSG00000198034	0	0.628884	0.998	0.973	0	CD4+_T
ENSG00000170889	0	0.621888	0.995	0.956	0	CD4+_T
ENSG00000143947	0	0.62007	0.999	0.99	0	CD4+_T
ENSG00000168028.1	0	0.618629	0.991	0.873	0	CD4+_T
ENSG00000177954	0	0.616211	0.999	0.997	0	CD4+_T
ENSG00000186468.1	0	0.615654	0.998	0.976	0	CD4+_T
ENSG00000233927	0	0.614203	0.999	0.991	0	CD4+_T
ENSG00000142541	0	0.613761	0.999	0.995	0	CD4+_T
ENSG00000131469	0	0.611258	0.995	0.951	0	CD4+_T
ENSG00000147604	0	0.604599	0.998	0.971	0	CD4+_T
ENSG00000133112.1	0	0.600439	0.999	0.992	0	CD4+_T
ENSG00000089157.1	0	0.598757	0.986	0.885	0	CD4+_T
ENSG00000105640.1	0	0.597255	0.999	0.98	0	CD4+_T
ENSG00000196683.1	0	0.592785	0.952	0.821	0	CD4+_T
ENSG00000124614	0	0.589519	0.991	0.925	0	CD4+_T
ENSG00000156508	0	0.587387	0.999	0.996	0	CD4+_T
ENSG00000147403	0	0.582372	0.999	0.998	0	CD4+_T
ENSG00000115268	0	0.577363	0.999	0.988	0	CD4+_T
ENSG00000241343	0	0.577198	0.97	0.845	0	CD4+_T
ENSG00000171858	0	0.575006	0.992	0.919	0	CD4+_T
ENSG00000145592	0	0.574598	0.998	0.979	0	CD4+_T
ENSG00000196531	0	0.572577	0.985	0.903	0	CD4+_T
ENSG00000204628	0	0.553845	0.993	0.929	0	CD4+_T
ENSG00000162244	0	0.552772	0.998	0.969	0	CD4+_T
ENSG00000188846	0	0.547964	0.998	0.967	0	CD4+_T
ENSG00000161016.1	0	0.542858	0.998	0.967	0	CD4+_T
ENSG00000149273.1	0	0.533473	0.999	0.985	0	CD4+_T
ENSG00000136942	0	0.52877	0.998	0.963	0	CD4+_T
ENSG00000114391	0	0.528603	0.994	0.942	0	CD4+_T
ENSG00000198242	0	0.508247	0.999	0.982	0	CD4+_T
ENSG00000008988	0	0.49072	0.997	0.978	0	CD4+_T
ENSG00000161970	0	0.486859	0.998	0.986	0	CD4+_T
ENSG00000166441	0	0.473011	0.998	0.988	0	CD4+_T
ENSG00000137818.1	0	0.470672	0.999	0.995	0	CD4+_T
ENSG00000108107	0	0.41063	0.998	0.992	0	CD4+_T
ENSG00000229117	0	0.399177	0.999	0.997	0	CD4+_T
ENSG00000166710	0	-0.474868	0.999	1	0	CD4+_T
ENSG00000198938.1	0	-0.583354	0.992	0.994	0	CD4+_T
ENSG00000140264	0	-0.666447	0.919	0.947	0	CD4+_T
ENSG00000198712.1	0	-0.747568	0.987	0.993	0	CD4+_T
ENSG00000104904.1	0	-0.801274	0.855	0.914	0	CD4+_T
ENSG00000198804	0	-0.814387	0.998	0.998	0	CD4+_T
ENSG00000213719.1	0	-0.970896	0.35	0.616	0	CD4+_T
ENSG00000116667	0	-0.980764	0.017	0.195	0	CD4+_T
ENSG00000169554	0	-1.0446	0.015	0.235	0	CD4+_T
ENSG00000179344.1	0	-1.11395	0.022	0.215	0	CD4+_T
ENSG00000196735.1	0	-1.2764	0.01	0.224	0	CD4+_T
ENSG00000115956	0	-1.30696	0.021	0.258	0	CD4+_T
ENSG00000172543.1	0	-1.31755	0.049	0.263	0	CD4+_T
ENSG00000122862.1	0	-1.32751	0.525	0.725	0	CD4+_T
ENSG00000171476.1	0	-1.4377	0.035	0.251	0	CD4+_T
ENSG00000112149.1	0	-1.44063	0.039	0.245	0	CD4+_T
ENSG00000026751	0	-1.46222	0.024	0.257	0	CD4+_T
ENSG00000100450	0	-1.47849	0.017	0.211	0	CD4+_T
ENSG00000239713	0	-1.50821	0.125	0.434	0	CD4+_T
ENSG00000135077	0	-1.61	0.01	0.19	0	CD4+_T
ENSG00000231389.1	0	-1.68644	0.053	0.33	0	CD4+_T
ENSG00000134539.1	0	-1.79213	0.02	0.314	0	CD4+_T
ENSG00000223865.1	0	-1.89151	0.104	0.425	0	CD4+_T
ENSG00000100097.1	0	-1.90887	0.192	0.485	0	CD4+_T
ENSG00000180644.1	0	-1.92312	0.041	0.307	0	CD4+_T
ENSG00000196126.1	0	-1.95421	0.045	0.323	0	CD4+_T
ENSG00000145649.1	0	-2.12358	0.036	0.341	0	CD4+_T
ENSG00000077984.1	0	-2.2671	0.108	0.521	0	CD4+_T
ENSG00000019582.1	0	-2.31479	0.447	0.69	0	CD4+_T
ENSG00000187118.1	0	-2.41257	0.081	0.437	0	CD4+_T
ENSG00000158869.1	0	-2.75281	0.045	0.32	0	CD4+_T
ENSG00000204287.1	0	-2.79266	0.045	0.326	0	CD4+_T
ENSG00000011600.1	0	-2.80111	0.033	0.41	0	CD4+_T
ENSG00000105374.1	0	-3.09543	0.069	0.58	0	CD4+_T
ENSG00000161570.1	0	-3.26669	0.166	0.665	0	CD4+_T
ENSG00000100453.1	0	-3.5039	0.071	0.385	0	CD4+_T
ENSG00000129277.1	0	-4.31916	0.145	0.454	0	CD4+_T
ENSG00000115523.1	0	-4.55139	0.145	0.552	0	CD4+_T
ENSG00000148303.1	3.01e-306	0.443709	0.993	0.947	6.09e-302	CD4+_T
ENSG00000234745	9e-302	-0.565547	0.985	0.995	1.82e-297	CD4+_T
ENSG00000089327.1	1.18e-301	0.745979	0.788	0.515	2.39e-297	CD4+_T
ENSG00000006075.1	4.05e-300	-4.75424	0.216	0.447	8.2e-296	CD4+_T
ENSG00000188404	1.38e-297	0.917474	0.512	0.208	2.79e-293	CD4+_T
ENSG00000122406	1.55e-296	0.527817	0.985	0.89	3.14e-292	CD4+_T
ENSG00000115738.1	1.1e-294	-1.34798	0.13	0.368	2.23e-290	CD4+_T
ENSG00000206503	1.31e-292	-0.621791	0.962	0.984	2.66e-288	CD4+_T
ENSG00000150045	2.34e-290	-1.162	0.008	0.159	4.73e-286	CD4+_T
ENSG00000155629	1.3e-288	-0.714732	0.005	0.151	2.63e-284	CD4+_T
ENSG00000204387.1	9.26e-288	0.775037	0.738	0.462	1.87e-283	CD4+_T
ENSG00000135404	3.27e-279	-1.39034	0.135	0.365	6.61e-275	CD4+_T
ENSG00000134545	3.19e-278	-1.48355	0.006	0.15	6.46e-274	CD4+_T
ENSG00000221983	1.88e-273	0.39151	0.996	0.964	3.81e-269	CD4+_T
ENSG00000149806	6.43e-270	0.361076	0.997	0.976	1.3e-265	CD4+_T
ENSG00000155130	8.71e-268	-1.31359	0.011	0.156	1.76e-263	CD4+_T
ENSG00000204257.1	1.67e-263	-0.814513	0.018	0.173	3.38e-259	CD4+_T
ENSG00000086730.1	3.71e-263	-0.663128	0.007	0.145	7.51e-259	CD4+_T
ENSG00000254087.1	9.37e-259	-0.582774	0.003	0.132	1.9e-254	CD4+_T
ENSG00000162924.1	1.44e-257	-1.08898	0.138	0.361	2.92e-253	CD4+_T
ENSG00000237541.1	4.46e-256	-0.806736	0.006	0.14	9.03e-252	CD4+_T
ENSG00000075624.1	5.74e-253	-1.21053	0.824	0.869	1.16e-248	CD4+_T
ENSG00000164483.1	6.71e-249	-1.07638	0.048	0.222	1.36e-244	CD4+_T
ENSG00000105372	2.23e-242	0.341796	0.999	0.994	4.52e-238	CD4+_T
ENSG00000104660.1	9.28e-242	0.79208	0.52	0.241	1.88e-237	CD4+_T
ENSG00000187109	4.1e-241	0.597463	0.87	0.669	8.29e-237	CD4+_T
ENSG00000111863.1	3.12e-238	0.917858	0.228	0.032	6.31e-234	CD4+_T
ENSG00000101017.1	6.49e-237	-0.656738	0.011	0.144	1.31e-232	CD4+_T
ENSG00000197756.1	1.43e-235	0.330269	0.998	0.981	2.89e-231	CD4+_T
ENSG00000163519.1	1.95e-235	0.815948	0.308	0.078	3.95e-231	CD4+_T
ENSG00000136167	4.09e-229	-0.94546	0.21	0.427	8.27e-225	CD4+_T
ENSG00000237943.1	3.21e-228	0.802815	0.416	0.157	6.5e-224	CD4+_T
ENSG00000137441	1.45e-227	-1.16529	0.011	0.138	2.93e-223	CD4+_T
ENSG00000198886.1	6.93e-227	-0.49854	0.987	0.988	1.4e-222	CD4+_T
ENSG00000118503	1.07e-226	-1.11701	0.09	0.279	2.16e-222	CD4+_T
ENSG00000142347.1	9.67e-226	-1.02446	0.091	0.281	1.96e-221	CD4+_T
ENSG00000145741	7.98e-223	0.477659	0.948	0.819	1.61e-218	CD4+_T
ENSG00000166920.1	1.74e-220	-3.03921	0.078	0.252	3.51e-216	CD4+_T
ENSG00000198899.1	1.91e-217	-0.526638	0.971	0.977	3.87e-213	CD4+_T
ENSG00000143669.1	8.86e-216	-0.940006	0.076	0.254	1.79e-211	CD4+_T
ENSG00000167658.1	8.37e-215	0.524873	0.911	0.757	1.69e-210	CD4+_T
ENSG00000140105.1	5.63e-213	-0.951059	0.085	0.268	1.14e-208	CD4+_T
ENSG00000234883.1	7.97e-212	-1.31877	0.063	0.232	1.61e-207	CD4+_T
ENSG00000104529	7.59e-211	0.40211	0.974	0.897	1.54e-206	CD4+_T
ENSG00000106803.1	2.93e-210	-0.965217	0.436	0.602	5.93e-206	CD4+_T
ENSG00000176788.1	5.92e-209	-0.58545	0.004	0.111	1.2e-204	CD4+_T
ENSG00000109861.1	1.01e-208	-0.887328	0.066	0.236	2.04e-204	CD4+_T
ENSG00000198786.1	1.45e-208	-0.663184	0.699	0.802	2.93e-204	CD4+_T
ENSG00000167286.1	2.55e-206	0.469274	0.681	0.347	5.16e-202	CD4+_T
ENSG00000004468	3.14e-206	-0.865357	0.029	0.169	6.35e-202	CD4+_T
ENSG00000156738.1	3.02e-201	-0.850376	0.004	0.107	6.11e-197	CD4+_T
ENSG00000103811.1	1.42e-200	-0.653692	0.02	0.149	2.87e-196	CD4+_T
ENSG00000140968.1	2.8e-200	-0.544967	0.008	0.12	5.67e-196	CD4+_T
ENSG00000115919	6.26e-200	-0.513323	0.006	0.113	1.27e-195	CD4+_T
ENSG00000115687.1	8.79e-200	0.989712	0.302	0.097	1.78e-195	CD4+_T
ENSG00000143545	1.87e-199	-0.653602	0.012	0.128	3.78e-195	CD4+_T
ENSG00000123349	4.49e-199	0.392846	0.972	0.876	9.08e-195	CD4+_T
ENSG00000132475	6e-199	-0.565816	0.932	0.952	1.21e-194	CD4+_T
ENSG00000163466.1	8.3e-198	-0.633902	0.668	0.773	1.68e-193	CD4+_T
ENSG00000144426	5.17e-197	0.555362	0.835	0.644	1.05e-192	CD4+_T
ENSG00000203747	1.43e-196	-0.775194	0.003	0.102	2.9e-192	CD4+_T
ENSG00000165168	2.56e-196	-0.805947	0.004	0.107	5.18e-192	CD4+_T
ENSG00000028137	5.54e-196	-0.91248	0.044	0.193	1.12e-191	CD4+_T
ENSG00000101336	1.27e-195	-0.516728	0.004	0.106	2.57e-191	CD4+_T
ENSG00000145220.1	2.36e-191	-1.05834	0.125	0.31	4.77e-187	CD4+_T
ENSG00000105369.1	9.45e-191	-0.784141	0.005	0.106	1.91e-186	CD4+_T
ENSG00000125691	3.5e-190	0.396038	0.976	0.888	7.08e-186	CD4+_T
ENSG00000242574.1	4.54e-190	-0.53356	0.006	0.11	9.18e-186	CD4+_T
ENSG00000174748.1	1.05e-188	0.299135	0.998	0.982	2.12e-184	CD4+_T
ENSG00000140379	3.06e-184	-1.27039	0.054	0.202	6.2e-180	CD4+_T
ENSG00000185215	3.73e-184	-1.02351	0.009	0.113	7.54e-180	CD4+_T
ENSG00000111640.1	3.64e-183	-0.64788	0.922	0.942	7.37e-179	CD4+_T
ENSG00000140575	6e-183	-0.75349	0.113	0.293	1.21e-178	CD4+_T
ENSG00000104972.1	1.88e-181	-0.536266	0.005	0.102	3.8e-177	CD4+_T
ENSG00000122694	3.68e-181	-0.702757	0.053	0.202	7.44e-177	CD4+_T
ENSG00000143185	2.27e-179	-1.50177	0.006	0.102	4.59e-175	CD4+_T
ENSG00000140988.1	6.19e-177	0.559907	0.789	0.577	1.25e-172	CD4+_T
ENSG00000155366	9.82e-177	-0.608681	0.026	0.15	1.99e-172	CD4+_T
ENSG00000169567	6.82e-175	0.456364	0.901	0.737	1.38e-170	CD4+_T
ENSG00000227507.1	6.54e-174	0.697953	0.249	0.07	1.32e-169	CD4+_T
ENSG00000170315	7.28e-174	-0.707729	0.467	0.625	1.47e-169	CD4+_T
ENSG00000198888.1	5.87e-173	-0.49709	0.96	0.961	1.19e-168	CD4+_T
ENSG00000168685.1	1.01e-171	0.671521	0.507	0.264	2.03e-167	CD4+_T
ENSG00000100100.1	1.68e-171	0.613836	0.435	0.195	3.4e-167	CD4+_T
ENSG00000117560	5.55e-169	-0.739321	0.016	0.123	1.12e-164	CD4+_T
ENSG00000011422	6.12e-168	-1.21055	0.012	0.113	1.24e-163	CD4+_T
ENSG00000185650.1	6.65e-168	-0.959344	0.216	0.394	1.35e-163	CD4+_T
ENSG00000205246.1	2.66e-167	0.507525	0.777	0.54	5.38e-163	CD4+_T
ENSG00000034510.1	5.05e-167	-0.589565	0.993	0.991	1.02e-162	CD4+_T
ENSG00000256039	1.07e-166	-0.659107	0.008	0.102	2.16e-162	CD4+_T
ENSG00000204525	3.96e-166	-0.458825	0.954	0.969	8.02e-162	CD4+_T
ENSG00000107968	6.88e-166	-0.601927	0.024	0.141	1.39e-161	CD4+_T
ENSG00000177410	1.27e-164	0.488602	0.82	0.612	2.57e-160	CD4+_T
ENSG00000109320	3.77e-163	-0.689965	0.051	0.188	7.64e-159	CD4+_T
ENSG00000265681	8.09e-163	0.446244	0.917	0.784	1.64e-158	CD4+_T
ENSG00000126264.1	9.33e-162	-0.963791	0.215	0.391	1.89e-157	CD4+_T
ENSG00000042493.1	9.17e-161	-0.579565	0.021	0.13	1.86e-156	CD4+_T
ENSG00000086300	1.75e-160	-1.05338	0.019	0.125	3.53e-156	CD4+_T
ENSG00000092841	2.15e-160	-0.644228	0.68	0.766	4.36e-156	CD4+_T
ENSG00000169136.1	8.7e-160	-0.812969	0.027	0.142	1.76e-155	CD4+_T
ENSG00000235576.1	2.17e-159	-0.971904	0.093	0.247	4.39e-155	CD4+_T
ENSG00000138795.1	4.13e-159	0.624417	0.18	0.033	8.36e-155	CD4+_T
ENSG00000130592.1	4.46e-157	-0.852009	0.284	0.454	9.03e-153	CD4+_T
ENSG00000082074.1	9.19e-157	0.584982	0.579	0.339	1.86e-152	CD4+_T
ENSG00000197728	9.6e-157	0.598704	0.913	0.879	1.94e-152	CD4+_T
ENSG00000137331.1	1.44e-156	-1.36093	0.051	0.181	2.91e-152	CD4+_T
ENSG00000127184	1.9e-154	0.378316	0.947	0.838	3.85e-150	CD4+_T
ENSG00000155368.1	4.48e-154	-0.769133	0.279	0.45	9.06e-150	CD4+_T
ENSG00000111537.1	7.32e-154	-4.28654	0.059	0.19	1.48e-149	CD4+_T
ENSG00000141682.1	1.27e-153	-0.764275	0.114	0.279	2.57e-149	CD4+_T
ENSG00000189067	2.46e-153	-0.852818	0.341	0.504	4.98e-149	CD4+_T
ENSG00000090339	8.52e-153	-0.618341	0.023	0.132	1.72e-148	CD4+_T
ENSG00000164111	2.63e-152	-1.00946	0.083	0.229	5.33e-148	CD4+_T
ENSG00000139187	7.87e-149	-0.817159	0.036	0.152	1.59e-144	CD4+_T
ENSG00000081059.1	4.36e-148	0.591422	0.428	0.213	8.82e-144	CD4+_T
ENSG00000129824.1	6.92e-148	0.793762	0.494	0.306	1.4e-143	CD4+_T
ENSG00000267519	2.53e-147	-0.864561	0.057	0.19	5.11e-143	CD4+_T
ENSG00000100906	8.98e-146	-1.10877	0.118	0.269	1.82e-141	CD4+_T
ENSG00000132432	1.13e-145	-0.839333	0.449	0.58	2.29e-141	CD4+_T
ENSG00000075420	3.93e-145	-0.492041	0.014	0.107	7.96e-141	CD4+_T
ENSG00000196329.1	4.38e-145	0.544086	0.521	0.289	8.86e-141	CD4+_T
ENSG00000205021	1.09e-144	-2.46824	0.023	0.125	2.2e-140	CD4+_T
ENSG00000113088	5.62e-144	-0.878898	0.033	0.146	1.14e-139	CD4+_T
ENSG00000090382	1.07e-141	-3.09513	0.029	0.134	2.16e-137	CD4+_T
ENSG00000005020.1	1.13e-141	-0.396702	0.018	0.116	2.29e-137	CD4+_T
ENSG00000132963.1	1.41e-141	-0.701237	0.361	0.517	2.85e-137	CD4+_T
ENSG00000162734.1	7.21e-141	-0.436945	0.023	0.127	1.46e-136	CD4+_T
ENSG00000172005.1	7.4e-141	0.567001	0.154	0.026	1.5e-136	CD4+_T
ENSG00000148175.1	2.09e-140	-0.712813	0.08	0.22	4.23e-136	CD4+_T
ENSG00000170873.1	2.7e-140	-0.49553	0.014	0.104	5.47e-136	CD4+_T
ENSG00000178719	6.03e-140	-0.539741	0.024	0.126	1.22e-135	CD4+_T
ENSG00000030582.1	1.9e-139	-0.823355	0.043	0.16	3.84e-135	CD4+_T
ENSG00000141526	2.45e-139	-0.500919	0.039	0.156	4.97e-135	CD4+_T
ENSG00000142634	4.9e-139	-0.485603	0.019	0.116	9.92e-135	CD4+_T
ENSG00000186469	9.1e-138	-0.853063	0.1	0.242	1.84e-133	CD4+_T
ENSG00000164687.1	1.73e-137	-0.858677	0.035	0.146	3.5e-133	CD4+_T
ENSG00000184182	1.41e-136	-0.821072	0.075	0.209	2.86e-132	CD4+_T
ENSG00000132334	2.39e-136	-0.63282	0.044	0.161	4.84e-132	CD4+_T
ENSG00000244509.1	2.51e-136	-0.680261	0.093	0.237	5.08e-132	CD4+_T
ENSG00000117984.1	3.06e-136	-0.988569	0.056	0.178	6.19e-132	CD4+_T
ENSG00000198851.1	1.91e-135	0.427918	0.522	0.279	3.87e-131	CD4+_T
ENSG00000138670.1	3.75e-134	-0.468288	0.022	0.12	7.59e-130	CD4+_T
ENSG00000050730	5.64e-134	-1.28488	0.017	0.106	1.14e-129	CD4+_T
ENSG00000136286.1	6.87e-133	-0.494249	0.045	0.164	1.39e-128	CD4+_T
ENSG00000129226	1.74e-132	-0.848603	0.061	0.184	3.52e-128	CD4+_T
ENSG00000269893	4.41e-132	0.557559	0.561	0.361	8.93e-128	CD4+_T
ENSG00000152495.1	9.83e-132	0.560048	0.196	0.054	1.99e-127	CD4+_T
ENSG00000134107	1.08e-131	-0.598471	0.047	0.164	2.18e-127	CD4+_T
ENSG00000003402	1.66e-131	-0.751393	0.338	0.489	3.36e-127	CD4+_T
ENSG00000108518	8.56e-130	-0.689183	0.223	0.385	1.73e-125	CD4+_T
ENSG00000101474	8.71e-128	-0.628125	0.043	0.153	1.76e-123	CD4+_T
ENSG00000020633	2.19e-127	-0.695232	0.148	0.301	4.43e-123	CD4+_T
ENSG00000124762	3.59e-127	-0.661478	0.032	0.134	7.26e-123	CD4+_T
ENSG00000177556	1.35e-125	-0.781176	0.117	0.26	2.73e-121	CD4+_T
ENSG00000131981	2.93e-125	-1.14671	0.092	0.226	5.93e-121	CD4+_T
ENSG00000130775.1	8.11e-125	-0.423276	0.024	0.12	1.64e-120	CD4+_T
ENSG00000100385	2.64e-123	-0.760381	0.062	0.18	5.33e-119	CD4+_T
ENSG00000044574	8.46e-123	-1.09488	0.181	0.332	1.71e-118	CD4+_T
ENSG00000131203	2.62e-121	-1.21856	0.024	0.115	5.31e-117	CD4+_T
ENSG00000232810	1.14e-120	-0.907063	0.02	0.107	2.3e-116	CD4+_T
ENSG00000114978.1	2.16e-120	-0.568911	0.157	0.314	4.37e-116	CD4+_T
ENSG00000163600.1	4.6e-120	0.536078	0.159	0.036	9.31e-116	CD4+_T
ENSG00000122545	5.11e-120	-0.664665	0.423	0.572	1.04e-115	CD4+_T
ENSG00000156273.1	5.57e-119	-0.421325	0.033	0.135	1.13e-114	CD4+_T
ENSG00000174021.1	1.2e-118	-0.649557	0.38	0.519	2.42e-114	CD4+_T
ENSG00000136950.1	5.14e-118	-0.620298	0.075	0.197	1.04e-113	CD4+_T
ENSG00000172757.1	5.91e-117	-0.515545	0.713	0.765	1.2e-112	CD4+_T
ENSG00000182718.1	1.06e-116	-0.717236	0.106	0.242	2.14e-112	CD4+_T
ENSG00000184840	3.04e-116	-0.641233	0.172	0.323	6.15e-112	CD4+_T
ENSG00000081041	4.52e-116	-1.64071	0.018	0.1	9.15e-112	CD4+_T
ENSG00000216490.1	3.37e-115	-0.488097	0.031	0.127	6.81e-111	CD4+_T
ENSG00000113328.1	5.01e-115	0.524005	0.38	0.202	1.01e-110	CD4+_T
ENSG00000131143	1.84e-114	0.317641	0.934	0.829	3.72e-110	CD4+_T
ENSG00000136997	2.89e-114	0.56691	0.268	0.116	5.84e-110	CD4+_T
ENSG00000187840.1	3.87e-114	-0.433454	0.028	0.12	7.83e-110	CD4+_T
ENSG00000172116.1	5.31e-114	-0.806385	0.09	0.216	1.07e-109	CD4+_T
ENSG00000142089	3.1e-113	-1.21416	0.168	0.306	6.26e-109	CD4+_T
ENSG00000189283.1	1.49e-112	0.521592	0.143	0.031	3.01e-108	CD4+_T
ENSG00000143870.1	2.65e-112	-0.594877	0.124	0.264	5.37e-108	CD4+_T
ENSG00000105835	2.96e-112	-1.12246	0.085	0.207	5.98e-108	CD4+_T
ENSG00000130402	9.04e-112	-0.520671	0.063	0.179	1.83e-107	CD4+_T
ENSG00000120306.1	1.08e-111	-0.470884	0.051	0.16	2.18e-107	CD4+_T
ENSG00000131871	9.01e-111	-0.687966	0.132	0.27	1.82e-106	CD4+_T
ENSG00000147677	1.05e-110	0.441577	0.678	0.493	2.13e-106	CD4+_T
ENSG00000173486	3.16e-110	-0.638998	0.191	0.34	6.39e-106	CD4+_T
ENSG00000111796.1	9e-109	-1.35385	0.129	0.26	1.82e-104	CD4+_T
ENSG00000143507	9.79e-109	-0.422256	0.026	0.114	1.98e-104	CD4+_T
ENSG00000185624	3.88e-108	-0.561419	0.067	0.182	7.86e-104	CD4+_T
ENSG00000136689	4.33e-108	-1.89126	0.049	0.148	8.76e-104	CD4+_T
ENSG00000059588.1	8.23e-108	0.665004	0.174	0.053	1.67e-103	CD4+_T
ENSG00000123689	2.23e-107	-2.15235	0.035	0.127	4.51e-103	CD4+_T
ENSG00000089248	6.22e-107	0.415536	0.613	0.411	1.26e-102	CD4+_T
ENSG00000170542	2.48e-106	-0.558503	0.055	0.162	5.02e-102	CD4+_T
ENSG00000167004	3.52e-106	-0.53168	0.077	0.196	7.12e-102	CD4+_T
ENSG00000135821	1.24e-105	-0.691575	0.04	0.135	2.51e-101	CD4+_T
ENSG00000082153	6.06e-105	-0.640064	0.223	0.369	1.23e-100	CD4+_T
ENSG00000164674.1	2e-102	-0.873803	0.147	0.271	4.05e-98	CD4+_T
ENSG00000133574.1	2.91e-102	0.389009	0.599	0.381	5.88e-98	CD4+_T
ENSG00000205542.1	5.46e-102	-0.31693	0.999	0.998	1.1e-97	CD4+_T
ENSG00000113719	1.04e-101	-0.444184	0.029	0.115	2.1e-97	CD4+_T
ENSG00000067225.1	6.08e-100	-0.656877	0.483	0.576	1.23e-95	CD4+_T
ENSG00000168894	2.58e-98	-0.578526	0.227	0.372	5.23e-94	CD4+_T
ENSG00000197746.1	3.63e-98	-1.18976	0.126	0.246	7.35e-94	CD4+_T
ENSG00000135245.1	1.61e-97	-0.565227	0.039	0.13	3.26e-93	CD4+_T
ENSG00000198843.1	2.42e-97	-0.534442	0.235	0.383	4.9e-93	CD4+_T
ENSG00000088986.1	3.43e-97	-0.606734	0.173	0.309	6.93e-93	CD4+_T
ENSG00000139193	4.89e-97	0.497455	0.265	0.122	9.89e-93	CD4+_T
ENSG00000156467.1	1.13e-96	0.289944	0.91	0.793	2.28e-92	CD4+_T
ENSG00000163564.1	1.78e-96	-0.852253	0.169	0.289	3.6e-92	CD4+_T
ENSG00000160255	2.09e-96	-0.576491	0.083	0.195	4.23e-92	CD4+_T
ENSG00000051108.1	3.56e-96	-0.702847	0.187	0.322	7.2e-92	CD4+_T
ENSG00000273445.1	3.99e-96	0.52888	0.145	0.038	8.08e-92	CD4+_T
ENSG00000102580	2.37e-95	-0.553495	0.068	0.175	4.8e-91	CD4+_T
ENSG00000069974	7.77e-95	-0.572354	0.101	0.218	1.57e-90	CD4+_T
ENSG00000027869.1	2.75e-94	-0.653216	0.072	0.176	5.57e-90	CD4+_T
ENSG00000155307	3.6e-94	-0.762981	0.207	0.336	7.28e-90	CD4+_T
ENSG00000117280.1	7.53e-94	-0.540295	0.104	0.225	1.52e-89	CD4+_T
ENSG00000134802	9.72e-94	-0.348265	0.024	0.101	1.97e-89	CD4+_T
ENSG00000117410	2.63e-93	-0.554922	0.139	0.267	5.32e-89	CD4+_T
ENSG00000246223.1	5.39e-93	0.432656	0.15	0.043	1.09e-88	CD4+_T
ENSG00000074842	7.63e-93	-0.439529	0.047	0.141	1.54e-88	CD4+_T
ENSG00000116679	7.65e-93	-0.651282	0.091	0.203	1.55e-88	CD4+_T
ENSG00000131669	1.62e-92	-1.09048	0.085	0.19	3.27e-88	CD4+_T
ENSG00000173193.1	3.71e-91	-0.682404	0.315	0.449	7.5e-87	CD4+_T
ENSG00000025708.1	6.78e-91	-0.608032	0.178	0.313	1.37e-86	CD4+_T
ENSG00000136810.1	1.72e-90	-2.11247	0.295	0.407	3.48e-86	CD4+_T
ENSG00000104312	2.34e-90	-0.434478	0.046	0.137	4.73e-86	CD4+_T
ENSG00000198168.1	2.82e-90	0.45447	0.408	0.244	5.7e-86	CD4+_T
ENSG00000106560.1	2.83e-90	0.40958	0.383	0.208	5.72e-86	CD4+_T
ENSG00000166128	4.15e-90	-0.447196	0.072	0.178	8.4e-86	CD4+_T
ENSG00000240065.1	4.67e-90	-0.517379	0.595	0.684	9.45e-86	CD4+_T
ENSG00000206560	1.32e-89	-0.4791	0.034	0.118	2.67e-85	CD4+_T
ENSG00000163874	1.19e-88	-0.429119	0.043	0.132	2.42e-84	CD4+_T
ENSG00000137076	5.03e-88	-0.466819	0.077	0.183	1.02e-83	CD4+_T
ENSG00000151150	1.01e-87	0.426546	0.125	0.031	2.04e-83	CD4+_T
ENSG00000265206.1	1.19e-87	-0.711112	0.309	0.429	2.41e-83	CD4+_T
ENSG00000233478	1.65e-86	0.399885	0.108	0.022	3.33e-82	CD4+_T
ENSG00000128228	5.06e-86	-0.44456	0.036	0.118	1.02e-81	CD4+_T
ENSG00000163328.1	5.3e-86	0.484928	0.246	0.112	1.07e-81	CD4+_T
ENSG00000084207.1	6.19e-86	-0.635332	0.248	0.373	1.25e-81	CD4+_T
ENSG00000110651	7.4e-86	-0.361597	0.029	0.106	1.5e-81	CD4+_T
ENSG00000169429	1.89e-85	-3.78989	0.122	0.229	3.82e-81	CD4+_T
ENSG00000142168	4.57e-85	0.445265	0.567	0.4	9.24e-81	CD4+_T
ENSG00000034677	5.95e-84	-0.589606	0.149	0.27	1.2e-79	CD4+_T
ENSG00000196154	1.97e-83	-0.922718	0.321	0.447	3.98e-79	CD4+_T
ENSG00000100911.1	4.07e-83	-0.64127	0.451	0.543	8.24e-79	CD4+_T
ENSG00000173762.1	4.72e-83	0.309363	0.612	0.404	9.55e-79	CD4+_T
ENSG00000108639.1	2.13e-82	-0.443082	0.056	0.148	4.32e-78	CD4+_T
ENSG00000118363	2.38e-82	-0.569299	0.312	0.438	4.81e-78	CD4+_T
ENSG00000162433	6.63e-82	-0.326448	0.031	0.108	1.34e-77	CD4+_T
ENSG00000129667	1.37e-81	-0.375241	0.04	0.123	2.77e-77	CD4+_T
ENSG00000125753.1	2.29e-81	-0.363713	0.049	0.138	4.63e-77	CD4+_T
ENSG00000163041.1	5.61e-81	-0.455046	0.74	0.766	1.13e-76	CD4+_T
ENSG00000106153.1	2.13e-80	-0.431545	0.646	0.694	4.3e-76	CD4+_T
ENSG00000149428	2.68e-80	-0.333346	0.029	0.103	5.43e-76	CD4+_T
ENSG00000067082	3.2e-80	-0.588486	0.5	0.591	6.49e-76	CD4+_T
ENSG00000197448	3.92e-80	0.407644	0.615	0.454	7.93e-76	CD4+_T
ENSG00000071127	8.7e-80	-0.366813	0.063	0.158	1.76e-75	CD4+_T
ENSG00000173198	1.45e-79	0.475449	0.145	0.049	2.94e-75	CD4+_T
ENSG00000178982.1	2.8e-79	0.346917	0.689	0.528	5.66e-75	CD4+_T
ENSG00000065357.1	3.57e-79	0.420404	0.178	0.07	7.23e-75	CD4+_T
ENSG00000136238	7.93e-79	-0.295362	0.029	0.102	1.6e-74	CD4+_T
ENSG00000143774	1.14e-78	-0.503327	0.203	0.331	2.31e-74	CD4+_T
ENSG00000138378.1	6.66e-78	-0.606025	0.121	0.226	1.35e-73	CD4+_T
ENSG00000181896.1	2.32e-77	0.421287	0.232	0.109	4.7e-73	CD4+_T
ENSG00000145050	4.08e-77	-0.596041	0.146	0.26	8.26e-73	CD4+_T
ENSG00000153310	7.44e-77	-0.521115	0.164	0.283	1.51e-72	CD4+_T
ENSG00000179218	8.51e-77	-0.625887	0.231	0.349	1.72e-72	CD4+_T
ENSG00000104320	1.13e-76	-0.535338	0.081	0.18	2.29e-72	CD4+_T
ENSG00000115310	1.75e-76	-0.359843	0.043	0.124	3.55e-72	CD4+_T
ENSG00000131795.1	2.39e-76	-0.487317	0.327	0.452	4.84e-72	CD4+_T
ENSG00000138495.1	2.43e-76	-0.519353	0.248	0.374	4.92e-72	CD4+_T
ENSG00000198833.1	4.06e-76	-0.310209	0.029	0.101	8.21e-72	CD4+_T
ENSG00000130303.1	7.6e-76	-0.600233	0.379	0.498	1.54e-71	CD4+_T
ENSG00000139112	9.2e-76	-0.464638	0.048	0.13	1.86e-71	CD4+_T
ENSG00000122122	2.27e-75	-0.401552	0.043	0.122	4.6e-71	CD4+_T
ENSG00000125354	2.3e-75	0.38777	0.451	0.294	4.66e-71	CD4+_T
ENSG00000116815	2.81e-75	-0.334587	0.043	0.123	5.69e-71	CD4+_T
ENSG00000222041	3.54e-75	-0.514517	0.115	0.224	7.16e-71	CD4+_T
ENSG00000229474	3.78e-75	-0.605137	0.051	0.133	7.65e-71	CD4+_T
ENSG00000118640	1.38e-74	-0.543781	0.284	0.403	2.79e-70	CD4+_T
ENSG00000145247.1	2.46e-74	0.437468	0.389	0.241	4.98e-70	CD4+_T
ENSG00000171490	2.78e-74	0.415178	0.463	0.316	5.63e-70	CD4+_T
ENSG00000156976.1	9.2e-74	0.354417	0.644	0.492	1.86e-69	CD4+_T
ENSG00000167797	1.5e-73	-0.548591	0.183	0.302	3.04e-69	CD4+_T
ENSG00000148908.1	2.65e-73	0.42179	0.413	0.27	5.36e-69	CD4+_T
ENSG00000111678.1	2.88e-73	0.388748	0.449	0.295	5.83e-69	CD4+_T
ENSG00000230989.1	2.91e-73	-0.404794	0.103	0.21	5.9e-69	CD4+_T
ENSG00000123416.1	3.3e-73	-0.914539	0.21	0.317	6.68e-69	CD4+_T
ENSG00000087074.1	3.8e-73	-0.57108	0.111	0.215	7.68e-69	CD4+_T
ENSG00000128524	3.88e-73	-0.581518	0.275	0.391	7.84e-69	CD4+_T
ENSG00000188313.1	4.8e-73	-0.607479	0.245	0.37	9.71e-69	CD4+_T
ENSG00000112096	1.15e-72	-2.32457	0.213	0.314	2.33e-68	CD4+_T
ENSG00000111669.1	2.59e-72	-0.497879	0.774	0.798	5.25e-68	CD4+_T
ENSG00000072274	6.59e-72	-0.356331	0.031	0.101	1.33e-67	CD4+_T
ENSG00000178104	6.64e-72	-0.468624	0.046	0.125	1.34e-67	CD4+_T
ENSG00000166681	2.26e-71	0.384282	0.104	0.027	4.58e-67	CD4+_T
ENSG00000143384	4.11e-71	-0.514836	0.141	0.251	8.32e-67	CD4+_T
ENSG00000163683.1	2.88e-70	-0.399683	0.044	0.121	5.82e-66	CD4+_T
ENSG00000141552.1	3.22e-70	-0.456356	0.205	0.325	6.51e-66	CD4+_T
ENSG00000134460	5.72e-70	-0.635863	0.065	0.152	1.16e-65	CD4+_T
ENSG00000131446	1.7e-69	-0.418214	0.064	0.15	3.45e-65	CD4+_T
ENSG00000184584	1.85e-69	0.367618	0.127	0.041	3.74e-65	CD4+_T
ENSG00000070961.1	7.89e-69	-0.417694	0.052	0.132	1.6e-64	CD4+_T
ENSG00000075884	1.37e-68	0.378076	0.332	0.194	2.78e-64	CD4+_T
ENSG00000134108	1.7e-68	-0.299137	0.041	0.117	3.44e-64	CD4+_T
ENSG00000134996	2.26e-68	-0.493732	0.15	0.26	4.58e-64	CD4+_T
ENSG00000172531.1	9.84e-68	-0.443739	0.186	0.304	1.99e-63	CD4+_T
ENSG00000177721.1	1.9e-67	0.353235	0.334	0.192	3.84e-63	CD4+_T
ENSG00000105583	2.27e-67	-0.486566	0.273	0.39	4.6e-63	CD4+_T
ENSG00000171314.1	3.03e-67	-0.512373	0.356	0.462	6.13e-63	CD4+_T
ENSG00000111775.1	3.13e-67	-0.433153	0.456	0.548	6.33e-63	CD4+_T
ENSG00000113263.1	6.26e-67	0.345363	0.203	0.093	1.27e-62	CD4+_T
ENSG00000172115.1	9.52e-67	-0.536298	0.293	0.405	1.93e-62	CD4+_T
ENSG00000134333	1.01e-66	-0.504912	0.683	0.717	2.03e-62	CD4+_T
ENSG00000120899	1.19e-66	-0.394873	0.056	0.136	2.41e-62	CD4+_T
ENSG00000163131	1.99e-66	-1.00876	0.29	0.393	4.03e-62	CD4+_T
ENSG00000178127	2.09e-66	0.429364	0.506	0.375	4.24e-62	CD4+_T
ENSG00000063046	2.91e-66	0.363818	0.487	0.341	5.89e-62	CD4+_T
ENSG00000182117.1	3.09e-66	-0.499213	0.303	0.415	6.25e-62	CD4+_T
ENSG00000035115	6.86e-66	0.393449	0.144	0.056	1.39e-61	CD4+_T
ENSG00000127314	8.04e-66	-0.51211	0.306	0.417	1.63e-61	CD4+_T
ENSG00000143013.1	8.81e-66	-0.388154	0.059	0.141	1.78e-61	CD4+_T
ENSG00000198736.1	9.63e-66	-0.262287	0.032	0.1	1.95e-61	CD4+_T
ENSG00000167460	1.25e-65	-0.316996	0.058	0.14	2.54e-61	CD4+_T
ENSG00000056558	2.13e-65	-0.449726	0.08	0.169	4.31e-61	CD4+_T
ENSG00000185201.1	2.87e-65	-0.624926	0.582	0.639	5.8e-61	CD4+_T
ENSG00000165527	4.42e-65	-0.270062	0.037	0.107	8.95e-61	CD4+_T
ENSG00000135426.1	4.69e-65	0.364777	0.155	0.063	9.5e-61	CD4+_T
ENSG00000132002	5.04e-65	0.54268	0.154	0.065	1.02e-60	CD4+_T
ENSG00000151846	5.2e-65	0.319695	0.1	0.027	1.05e-60	CD4+_T
ENSG00000147065	6.15e-65	-0.490895	0.215	0.329	1.25e-60	CD4+_T
ENSG00000241553.1	8.58e-65	-0.426389	0.165	0.278	1.74e-60	CD4+_T
ENSG00000188243	5.19e-64	0.292118	0.756	0.619	1.05e-59	CD4+_T
ENSG00000197903.1	1.08e-63	-0.402289	0.059	0.139	2.18e-59	CD4+_T
ENSG00000162704.1	1.9e-63	-0.53148	0.35	0.447	3.85e-59	CD4+_T
ENSG00000172270	2.62e-63	-0.460683	0.171	0.279	5.3e-59	CD4+_T
ENSG00000198258	4.19e-63	-0.370164	0.54	0.616	8.48e-59	CD4+_T
ENSG00000118418.1	8.25e-63	-0.504774	0.194	0.301	1.67e-58	CD4+_T
ENSG00000127152.1	8.54e-63	0.327649	0.182	0.08	1.73e-58	CD4+_T
ENSG00000145901	1.15e-62	-0.545708	0.208	0.314	2.33e-58	CD4+_T
ENSG00000097033	1.57e-62	-0.396423	0.108	0.206	3.18e-58	CD4+_T
ENSG00000150991	1.85e-62	-0.422521	0.486	0.593	3.75e-58	CD4+_T
ENSG00000114353	2.66e-62	-0.387003	0.093	0.187	5.38e-58	CD4+_T
ENSG00000197930	2.72e-62	-0.44796	0.071	0.154	5.5e-58	CD4+_T
ENSG00000091317.1	5.22e-62	-0.381811	0.145	0.253	1.06e-57	CD4+_T
ENSG00000163734	5.48e-62	-3.07398	0.059	0.133	1.11e-57	CD4+_T
ENSG00000107263	5.92e-62	-0.273912	0.039	0.108	1.2e-57	CD4+_T
ENSG00000177885.1	8.26e-62	-0.284694	0.053	0.131	1.67e-57	CD4+_T
ENSG00000180304	1.62e-61	-0.412795	0.1	0.194	3.29e-57	CD4+_T
ENSG00000004455.1	1.64e-61	-0.366339	0.078	0.166	3.31e-57	CD4+_T
ENSG00000144802	1.66e-61	-0.427928	0.054	0.13	3.35e-57	CD4+_T
ENSG00000136603.1	1.79e-61	-0.383899	0.082	0.171	3.63e-57	CD4+_T
ENSG00000005302.1	1.98e-61	0.395519	0.321	0.199	4e-57	CD4+_T
ENSG00000138071	7.3e-61	-0.407676	0.151	0.258	1.48e-56	CD4+_T
ENSG00000213658.1	8.35e-61	0.318885	0.32	0.185	1.69e-56	CD4+_T
ENSG00000155660	8.77e-61	-0.38819	0.061	0.139	1.77e-56	CD4+_T
ENSG00000245164.1	1.64e-60	0.309852	0.268	0.143	3.32e-56	CD4+_T
ENSG00000198818.1	7.09e-60	-0.316645	0.081	0.169	1.44e-55	CD4+_T
ENSG00000078596.1	1.18e-59	0.340361	0.167	0.073	2.39e-55	CD4+_T
ENSG00000151694	1.2e-59	-0.324902	0.05	0.124	2.42e-55	CD4+_T
ENSG00000104549.1	1.76e-59	-0.27478	0.039	0.106	3.57e-55	CD4+_T
ENSG00000132507.1	1.94e-59	-0.446422	0.194	0.302	3.93e-55	CD4+_T
ENSG00000123146	1.76e-58	-0.519572	0.127	0.22	3.55e-54	CD4+_T
ENSG00000159720.1	2.25e-58	-0.270947	0.053	0.128	4.56e-54	CD4+_T
ENSG00000067560	9.12e-58	-0.455256	0.358	0.457	1.84e-53	CD4+_T
ENSG00000113732.1	1.34e-57	-0.440841	0.417	0.502	2.7e-53	CD4+_T
ENSG00000212907.1	2.6e-57	-0.444257	0.386	0.489	5.26e-53	CD4+_T
ENSG00000137312	1.7e-56	-0.363751	0.087	0.173	3.44e-52	CD4+_T
ENSG00000084733	1.79e-56	-0.303343	0.079	0.163	3.63e-52	CD4+_T
ENSG00000058262	1.94e-56	-0.268357	0.04	0.106	3.92e-52	CD4+_T
ENSG00000002549.1	2.56e-56	-0.492979	0.177	0.279	5.18e-52	CD4+_T
ENSG00000078369	3.31e-56	-0.317829	0.066	0.144	6.71e-52	CD4+_T
ENSG00000121073	8.48e-56	-0.329195	0.059	0.133	1.72e-51	CD4+_T
ENSG00000120686	1.33e-55	-0.398963	0.143	0.241	2.69e-51	CD4+_T
ENSG00000090520	1.81e-55	-0.333122	0.07	0.148	3.67e-51	CD4+_T
ENSG00000100219	1.95e-55	-0.290496	0.04	0.105	3.94e-51	CD4+_T
ENSG00000213722.1	2.5e-55	-0.321806	0.04	0.104	5.05e-51	CD4+_T
ENSG00000114861	5.01e-55	0.339132	0.412	0.284	1.01e-50	CD4+_T
ENSG00000149212	8.67e-55	0.352869	0.117	0.044	1.76e-50	CD4+_T
ENSG00000110047	1.84e-54	-0.344855	0.046	0.112	3.72e-50	CD4+_T
ENSG00000085117.1	2.47e-54	-0.324845	0.056	0.127	5e-50	CD4+_T
ENSG00000108679	3.21e-54	0.322316	0.106	0.037	6.5e-50	CD4+_T
ENSG00000112531	3.53e-54	-0.284625	0.045	0.112	7.15e-50	CD4+_T
ENSG00000085832	4.14e-54	-0.298946	0.046	0.114	8.38e-50	CD4+_T
ENSG00000164924.1	4.74e-54	-0.418804	0.344	0.447	9.6e-50	CD4+_T
ENSG00000100387.1	7.74e-54	-0.385461	0.351	0.456	1.57e-49	CD4+_T
ENSG00000163191	1.2e-53	-0.996482	0.464	0.528	2.44e-49	CD4+_T
ENSG00000015475.1	1.75e-53	-0.412448	0.062	0.135	3.53e-49	CD4+_T
ENSG00000055070	3.27e-53	-0.341056	0.113	0.205	6.62e-49	CD4+_T
ENSG00000134375	4.35e-53	-0.281133	0.067	0.144	8.81e-49	CD4+_T
ENSG00000136213	4.58e-53	-0.542211	0.199	0.292	9.27e-49	CD4+_T
ENSG00000135441	5.8e-53	-0.422962	0.267	0.372	1.17e-48	CD4+_T
ENSG00000160932	6.28e-53	-0.515654	0.581	0.656	1.27e-48	CD4+_T
ENSG00000100644	1.2e-52	-0.484104	0.168	0.263	2.42e-48	CD4+_T
ENSG00000148516	1.47e-52	0.339068	0.142	0.062	2.97e-48	CD4+_T
ENSG00000108946	1.7e-52	-0.313417	0.072	0.149	3.45e-48	CD4+_T
ENSG00000184009.1	3.2e-52	-0.568062	0.563	0.607	6.48e-48	CD4+_T
ENSG00000170348	3.31e-52	-0.389293	0.125	0.217	6.7e-48	CD4+_T
ENSG00000112679.1	3.46e-52	-0.266489	0.041	0.104	7e-48	CD4+_T
ENSG00000173726	6.18e-52	0.323111	0.47	0.35	1.25e-47	CD4+_T
ENSG00000204482	9.54e-52	-0.558848	0.047	0.112	1.93e-47	CD4+_T
ENSG00000213064.1	1.16e-51	-0.276536	0.045	0.11	2.34e-47	CD4+_T
ENSG00000112335.1	1.25e-51	-0.297146	0.079	0.16	2.52e-47	CD4+_T
ENSG00000211450.1	1.42e-51	-0.447405	0.393	0.477	2.88e-47	CD4+_T
ENSG00000171522	1.62e-51	-0.34969	0.056	0.126	3.28e-47	CD4+_T
ENSG00000134825	1.92e-51	-0.421361	0.494	0.558	3.88e-47	CD4+_T
ENSG00000174695	2.25e-51	-0.33696	0.125	0.218	4.55e-47	CD4+_T
ENSG00000146112	2.56e-51	-0.415029	0.149	0.241	5.18e-47	CD4+_T
ENSG00000048740	3.79e-51	-0.430723	0.152	0.247	7.67e-47	CD4+_T
ENSG00000090554.1	5.62e-51	0.291552	0.146	0.065	1.14e-46	CD4+_T
ENSG00000135269	9.95e-51	-0.352009	0.092	0.174	2.01e-46	CD4+_T
ENSG00000177311	1.08e-50	-0.351534	0.066	0.138	2.2e-46	CD4+_T
ENSG00000130755.1	1.09e-50	0.255048	0.659	0.507	2.21e-46	CD4+_T
ENSG00000119632	1.23e-50	-0.387064	0.138	0.23	2.48e-46	CD4+_T
ENSG00000134248.1	1.44e-50	-0.38676	0.263	0.365	2.91e-46	CD4+_T
ENSG00000051523	3.52e-50	-0.341346	0.067	0.139	7.12e-46	CD4+_T
ENSG00000143761	7.44e-50	-0.423811	0.33	0.426	1.51e-45	CD4+_T
ENSG00000169223	7.49e-50	-0.384938	0.16	0.256	1.52e-45	CD4+_T
ENSG00000242247	1.09e-49	-0.355608	0.078	0.154	2.2e-45	CD4+_T
ENSG00000154589	1.4e-49	0.430089	0.199	0.113	2.84e-45	CD4+_T
ENSG00000160991.1	1.59e-49	-0.293152	0.056	0.124	3.22e-45	CD4+_T
ENSG00000077721	2.31e-49	-0.309546	0.076	0.152	4.67e-45	CD4+_T
ENSG00000142669	2.39e-49	-0.542323	0.71	0.729	4.84e-45	CD4+_T
ENSG00000149925.1	4.04e-49	-0.365794	0.718	0.731	8.17e-45	CD4+_T
ENSG00000101082	4.44e-49	-0.483143	0.059	0.125	8.99e-45	CD4+_T
ENSG00000123595	5.09e-49	-0.320326	0.042	0.103	1.03e-44	CD4+_T
ENSG00000105993.1	5.58e-49	-0.470919	0.335	0.425	1.13e-44	CD4+_T
ENSG00000110321.1	6.01e-49	-0.385361	0.29	0.39	1.22e-44	CD4+_T
ENSG00000102172.1	1.28e-48	-0.401232	0.104	0.186	2.59e-44	CD4+_T
ENSG00000125538	1.29e-48	-2.85562	0.12	0.195	2.61e-44	CD4+_T
ENSG00000083457	1.29e-48	-0.421494	0.097	0.175	2.62e-44	CD4+_T
ENSG00000128989.1	1.39e-48	-0.305433	0.102	0.187	2.81e-44	CD4+_T
ENSG00000181847.1	1.52e-48	-0.465323	0.08	0.153	3.09e-44	CD4+_T
ENSG00000213988	1.8e-48	0.352599	0.309	0.204	3.64e-44	CD4+_T
ENSG00000112081.1	2.98e-48	-0.384999	0.326	0.42	6.03e-44	CD4+_T
ENSG00000102144	1.32e-47	-0.45623	0.488	0.557	2.67e-43	CD4+_T
ENSG00000121579	1.45e-47	-0.314778	0.065	0.134	2.94e-43	CD4+_T
ENSG00000131236	1.63e-47	-0.375606	0.2	0.298	3.29e-43	CD4+_T
ENSG00000059804	2.2e-47	-0.609185	0.158	0.241	4.45e-43	CD4+_T
ENSG00000166598	2.88e-47	-0.586441	0.22	0.309	5.83e-43	CD4+_T
ENSG00000213203.1	4.68e-47	0.254285	0.196	0.102	9.48e-43	CD4+_T
ENSG00000139644	6.29e-47	-0.393078	0.399	0.484	1.27e-42	CD4+_T
ENSG00000129235	6.64e-47	-0.289875	0.091	0.171	1.34e-42	CD4+_T
ENSG00000184922	2.23e-46	-0.338379	0.077	0.149	4.52e-42	CD4+_T
ENSG00000138293	2.35e-46	-0.28587	0.063	0.132	4.75e-42	CD4+_T
ENSG00000174946.1	2.46e-46	0.353014	0.217	0.12	4.99e-42	CD4+_T
ENSG00000176340	4.39e-46	-0.376688	0.45	0.523	8.88e-42	CD4+_T
ENSG00000070718.1	4.45e-46	0.292472	0.14	0.064	9.01e-42	CD4+_T
ENSG00000104763	5.32e-46	-0.358291	0.051	0.113	1.08e-41	CD4+_T
ENSG00000143119	9.78e-46	-0.420374	0.374	0.463	1.98e-41	CD4+_T
ENSG00000168701	1.8e-45	-0.324113	0.121	0.207	3.64e-41	CD4+_T
ENSG00000164733	2.13e-45	-0.917593	0.099	0.17	4.31e-41	CD4+_T
ENSG00000127022	2.99e-45	-0.348772	0.125	0.21	6.05e-41	CD4+_T
ENSG00000135842	4.43e-45	-0.300448	0.071	0.141	8.97e-41	CD4+_T
ENSG00000147168	5.16e-45	-0.422813	0.459	0.54	1.04e-40	CD4+_T
ENSG00000163902	1.73e-44	-0.257638	0.056	0.121	3.5e-40	CD4+_T
ENSG00000141741	2.22e-44	-0.344564	0.14	0.227	4.49e-40	CD4+_T
ENSG00000113811	4.36e-44	-0.475934	0.402	0.478	8.82e-40	CD4+_T
ENSG00000140564	5.27e-44	-0.316889	0.043	0.1	1.07e-39	CD4+_T
ENSG00000042753	6.46e-44	-0.357675	0.142	0.229	1.31e-39	CD4+_T
ENSG00000125629	7.58e-44	-0.278055	0.053	0.114	1.53e-39	CD4+_T
ENSG00000100902	9.59e-44	-0.358552	0.128	0.211	1.94e-39	CD4+_T
ENSG00000168394.1	1.85e-43	-0.406493	0.293	0.385	3.74e-39	CD4+_T
ENSG00000182944	2.14e-43	-0.328672	0.149	0.237	4.34e-39	CD4+_T
ENSG00000129128	2.26e-43	-0.331646	0.114	0.195	4.57e-39	CD4+_T
ENSG00000169564	2.37e-43	-0.383384	0.35	0.438	4.79e-39	CD4+_T
ENSG00000166501.1	2.75e-43	-0.297779	0.053	0.113	5.56e-39	CD4+_T
ENSG00000147669	2.84e-43	-0.37871	0.185	0.277	5.74e-39	CD4+_T
ENSG00000133030	2.85e-43	0.278797	0.122	0.054	5.76e-39	CD4+_T
ENSG00000198771.1	3.84e-43	-0.278959	0.061	0.126	7.76e-39	CD4+_T
ENSG00000198417	4.15e-43	-0.564308	0.056	0.117	8.41e-39	CD4+_T
ENSG00000184007	6.34e-43	-0.365108	0.15	0.235	1.28e-38	CD4+_T
ENSG00000134308	6.78e-43	-0.355266	0.126	0.208	1.37e-38	CD4+_T
ENSG00000163386	7.79e-43	-0.300485	0.081	0.153	1.58e-38	CD4+_T
ENSG00000130066	1.19e-42	-0.71334	0.632	0.68	2.41e-38	CD4+_T
ENSG00000164308	1.32e-42	0.339925	0.218	0.129	2.67e-38	CD4+_T
ENSG00000213523	2e-42	-0.292312	0.079	0.149	4.04e-38	CD4+_T
ENSG00000110324.1	2.19e-42	-0.384206	0.176	0.261	4.44e-38	CD4+_T
ENSG00000164346	3.36e-42	0.2845	0.464	0.349	6.8e-38	CD4+_T
ENSG00000159202	3.84e-42	-0.255252	0.053	0.114	7.78e-38	CD4+_T
ENSG00000166797.1	6.4e-42	-0.333614	0.122	0.202	1.29e-37	CD4+_T
ENSG00000145354.1	7.67e-42	-0.348027	0.145	0.23	1.55e-37	CD4+_T
ENSG00000197622	8.02e-42	-0.384631	0.18	0.268	1.62e-37	CD4+_T
ENSG00000134684	1.55e-41	-0.303967	0.05	0.108	3.14e-37	CD4+_T
ENSG00000076944	1.65e-41	-0.273578	0.064	0.128	3.34e-37	CD4+_T
ENSG00000131174.1	2.11e-41	-0.365899	0.416	0.489	4.27e-37	CD4+_T
ENSG00000166340	2.22e-41	-0.356435	0.106	0.181	4.49e-37	CD4+_T
ENSG00000106245	2.71e-41	-0.353835	0.151	0.235	5.48e-37	CD4+_T
ENSG00000105887.1	3.6e-41	-0.29901	0.127	0.21	7.29e-37	CD4+_T
ENSG00000050426.1	5.49e-41	0.266051	0.167	0.089	1.11e-36	CD4+_T
ENSG00000122566.1	5.64e-41	-0.33884	0.471	0.537	1.14e-36	CD4+_T
ENSG00000136560.1	6.01e-41	-0.327114	0.202	0.296	1.22e-36	CD4+_T
ENSG00000108061.1	7.47e-41	-0.299348	0.121	0.202	1.51e-36	CD4+_T
ENSG00000163001	1.05e-40	0.299197	0.192	0.11	2.12e-36	CD4+_T
ENSG00000124942	1.19e-40	-0.358416	0.097	0.17	2.42e-36	CD4+_T
ENSG00000183696.1	1.43e-40	-0.452151	0.148	0.226	2.88e-36	CD4+_T
ENSG00000258289	1.9e-40	0.267814	0.478	0.368	3.85e-36	CD4+_T
ENSG00000178878	1.95e-40	0.258258	0.115	0.051	3.95e-36	CD4+_T
ENSG00000242372.1	2e-40	-0.280408	0.105	0.182	4.04e-36	CD4+_T
ENSG00000117500	2.1e-40	-0.257487	0.07	0.135	4.24e-36	CD4+_T
ENSG00000175334.1	2.1e-40	-0.365285	0.172	0.259	4.25e-36	CD4+_T
ENSG00000170222	2.2e-40	0.256358	0.114	0.05	4.46e-36	CD4+_T
ENSG00000198830.1	2.97e-40	-0.393084	0.427	0.496	6e-36	CD4+_T
ENSG00000089220.1	3.06e-40	0.283086	0.369	0.261	6.2e-36	CD4+_T
ENSG00000164405.1	4e-40	-0.381521	0.311	0.393	8.1e-36	CD4+_T
ENSG00000172331	5.38e-40	-0.363254	0.049	0.105	1.09e-35	CD4+_T
ENSG00000126432	6.48e-40	-0.383512	0.24	0.328	1.31e-35	CD4+_T
ENSG00000198763.1	6.96e-40	-0.260131	0.983	0.976	1.41e-35	CD4+_T
ENSG00000122085	9.16e-40	0.274391	0.249	0.156	1.85e-35	CD4+_T
ENSG00000170144.1	9.21e-40	-0.349684	0.301	0.389	1.86e-35	CD4+_T
ENSG00000155115.1	1.44e-39	-0.277537	0.14	0.225	2.92e-35	CD4+_T
ENSG00000106948	1.46e-39	-0.473524	0.157	0.232	2.96e-35	CD4+_T
ENSG00000086061.1	1.55e-39	-0.372776	0.233	0.321	3.13e-35	CD4+_T
ENSG00000135090	1.61e-39	-0.349285	0.17	0.254	3.26e-35	CD4+_T
ENSG00000149100	3.37e-39	0.273633	0.373	0.269	6.82e-35	CD4+_T
ENSG00000142546.1	4.4e-39	0.359158	0.322	0.226	8.9e-35	CD4+_T
ENSG00000150977	7.74e-39	-0.286875	0.089	0.159	1.57e-34	CD4+_T
ENSG00000164466.1	8.61e-39	0.273357	0.226	0.139	1.74e-34	CD4+_T
ENSG00000197540.1	9.47e-39	-0.534267	0.148	0.216	1.92e-34	CD4+_T
ENSG00000141522	1.21e-38	-0.362923	0.278	0.366	2.46e-34	CD4+_T
ENSG00000204642	1.38e-38	-0.365857	0.28	0.37	2.79e-34	CD4+_T
ENSG00000232956.1	1.59e-38	-0.282206	0.082	0.15	3.22e-34	CD4+_T
ENSG00000177879.1	1.79e-38	-0.367363	0.202	0.288	3.61e-34	CD4+_T
ENSG00000065911	4.41e-38	-0.361553	0.125	0.201	8.92e-34	CD4+_T
ENSG00000127603	4.52e-38	-0.36545	0.112	0.184	9.14e-34	CD4+_T
ENSG00000254999.1	4.57e-38	-0.350819	0.428	0.497	9.24e-34	CD4+_T
ENSG00000111229.1	5.5e-38	-0.331732	0.505	0.564	1.11e-33	CD4+_T
ENSG00000169241.1	5.59e-38	-0.275117	0.091	0.16	1.13e-33	CD4+_T
ENSG00000148248.1	6.04e-38	-0.307693	0.085	0.152	1.22e-33	CD4+_T
ENSG00000140319.1	9.12e-38	-0.250566	0.739	0.747	1.85e-33	CD4+_T
ENSG00000266402	9.58e-38	0.273489	0.175	0.101	1.94e-33	CD4+_T
ENSG00000197536	1.19e-37	-0.468316	0.19	0.268	2.41e-33	CD4+_T
ENSG00000149923	1.55e-37	-0.304422	0.147	0.23	3.14e-33	CD4+_T
ENSG00000133639	1.78e-37	-0.467203	0.348	0.42	3.6e-33	CD4+_T
ENSG00000136754	2.22e-37	-0.289517	0.085	0.152	4.49e-33	CD4+_T
ENSG00000133961	3.53e-37	-0.2591	0.072	0.135	7.13e-33	CD4+_T
ENSG00000002834	3.76e-37	-0.277552	0.066	0.127	7.62e-33	CD4+_T
ENSG00000162434	4.06e-37	-0.326805	0.135	0.212	8.21e-33	CD4+_T
ENSG00000054148.1	4.3e-37	-0.32409	0.158	0.24	8.71e-33	CD4+_T
ENSG00000204256	4.5e-37	-0.343233	0.171	0.253	9.11e-33	CD4+_T
ENSG00000070831	4.65e-37	-0.372862	0.361	0.441	9.41e-33	CD4+_T
ENSG00000162194	6.63e-37	-0.321105	0.149	0.228	1.34e-32	CD4+_T
ENSG00000100345	7.59e-37	-0.330593	0.125	0.2	1.54e-32	CD4+_T
ENSG00000150347	9.74e-37	0.295733	0.434	0.327	1.97e-32	CD4+_T
ENSG00000026025	1.23e-36	-1.05503	0.287	0.348	2.49e-32	CD4+_T
ENSG00000129534.1	1.65e-36	-0.276083	0.068	0.129	3.33e-32	CD4+_T
ENSG00000143420.1	1.72e-36	-0.36526	0.272	0.355	3.48e-32	CD4+_T
ENSG00000125148.1	2.07e-36	-1.2678	0.589	0.646	4.18e-32	CD4+_T
ENSG00000166562.1	2.08e-36	-0.383585	0.143	0.218	4.21e-32	CD4+_T
ENSG00000185811.1	3.2e-36	0.257807	0.265	0.175	6.47e-32	CD4+_T
ENSG00000127922	3.75e-36	-0.317797	0.266	0.354	7.59e-32	CD4+_T
ENSG00000125835.1	5.63e-36	-0.360817	0.273	0.355	1.14e-31	CD4+_T
ENSG00000196954	7.25e-36	-0.384102	0.31	0.389	1.47e-31	CD4+_T
ENSG00000113448.1	9.55e-36	-0.469724	0.126	0.192	1.93e-31	CD4+_T
ENSG00000118971	1.01e-35	-0.461505	0.099	0.163	2.03e-31	CD4+_T
ENSG00000010810.1	1.48e-35	-0.488858	0.24	0.308	3e-31	CD4+_T
ENSG00000111913	1.64e-35	0.258202	0.315	0.217	3.31e-31	CD4+_T
ENSG00000187239.1	1.66e-35	-0.349248	0.187	0.267	3.36e-31	CD4+_T
ENSG00000126860.1	1.7e-35	0.269365	0.361	0.255	3.45e-31	CD4+_T
ENSG00000130429.1	1.8e-35	-0.354355	0.371	0.447	3.65e-31	CD4+_T
ENSG00000170043.1	1.89e-35	-0.361659	0.281	0.363	3.82e-31	CD4+_T
ENSG00000116288.1	1.92e-35	-0.361874	0.348	0.426	3.89e-31	CD4+_T
ENSG00000130522.1	2.3e-35	-0.31393	0.098	0.166	4.65e-31	CD4+_T
ENSG00000110852.1	2.9e-35	-0.485656	0.486	0.539	5.87e-31	CD4+_T
ENSG00000124831.1	3.13e-35	-0.344159	0.217	0.301	6.33e-31	CD4+_T
ENSG00000175756.1	3.3e-35	-0.303332	0.156	0.235	6.68e-31	CD4+_T
ENSG00000082996	3.9e-35	-0.311153	0.094	0.16	7.9e-31	CD4+_T
ENSG00000147872	4.24e-35	-0.391355	0.083	0.145	8.59e-31	CD4+_T
ENSG00000103363	4.52e-35	-0.361439	0.524	0.568	9.15e-31	CD4+_T
ENSG00000120533.1	5.84e-35	-0.327239	0.265	0.351	1.18e-30	CD4+_T
ENSG00000005844	6.25e-35	-0.326044	0.056	0.109	1.26e-30	CD4+_T
ENSG00000205352.1	7.65e-35	-0.334773	0.379	0.453	1.55e-30	CD4+_T
ENSG00000150779	8.59e-35	-0.335141	0.176	0.255	1.74e-30	CD4+_T
ENSG00000105669.1	1.18e-34	-0.344117	0.295	0.377	2.4e-30	CD4+_T
ENSG00000149357.1	1.46e-34	-0.319741	0.2	0.283	2.96e-30	CD4+_T
ENSG00000160213.1	1.68e-34	-1.15484	0.356	0.406	3.4e-30	CD4+_T
ENSG00000198727.1	1.68e-34	-0.297965	0.963	0.941	3.41e-30	CD4+_T
ENSG00000185507.1	2.4e-34	-0.436775	0.204	0.281	4.86e-30	CD4+_T
ENSG00000175354	2.53e-34	-0.379696	0.236	0.315	5.11e-30	CD4+_T
ENSG00000131051	2.57e-34	-0.322789	0.526	0.582	5.2e-30	CD4+_T
ENSG00000111679.1	2.83e-34	-0.279539	0.069	0.128	5.72e-30	CD4+_T
ENSG00000121716	3.01e-34	-0.360658	0.086	0.146	6.09e-30	CD4+_T
ENSG00000150593.1	3.07e-34	0.25526	0.341	0.24	6.22e-30	CD4+_T
ENSG00000087086	3.16e-34	-1.29955	0.992	0.981	6.39e-30	CD4+_T
ENSG00000105202	3.8e-34	0.269308	0.378	0.279	7.68e-30	CD4+_T
ENSG00000197121	4.41e-34	0.278194	0.116	0.058	8.92e-30	CD4+_T
ENSG00000143549.1	1.29e-33	-0.316492	0.463	0.523	2.6e-29	CD4+_T
ENSG00000089289	2.79e-33	0.256002	0.34	0.246	5.64e-29	CD4+_T
ENSG00000231925	2.89e-33	-0.332038	0.39	0.469	5.84e-29	CD4+_T
ENSG00000155926.1	5.66e-33	-0.537096	0.125	0.187	1.15e-28	CD4+_T
ENSG00000204397.1	5.84e-33	-0.447962	0.259	0.332	1.18e-28	CD4+_T
ENSG00000137575	6.05e-33	-0.507475	0.205	0.274	1.23e-28	CD4+_T
ENSG00000115091	6.97e-33	-0.334172	0.26	0.343	1.41e-28	CD4+_T
ENSG00000141002	6.98e-33	-0.362639	0.294	0.374	1.41e-28	CD4+_T
ENSG00000139278	1.09e-32	-0.340478	0.094	0.155	2.21e-28	CD4+_T
ENSG00000122218	1.5e-32	-0.273551	0.089	0.151	3.04e-28	CD4+_T
ENSG00000241468.1	2.74e-32	-0.326448	0.336	0.408	5.55e-28	CD4+_T
ENSG00000115935.1	2.97e-32	-0.39595	0.421	0.479	6.01e-28	CD4+_T
ENSG00000068796.1	3.44e-32	0.250738	0.203	0.127	6.97e-28	CD4+_T
ENSG00000167996.1	4.85e-32	-2.14896	0.494	0.516	9.8e-28	CD4+_T
ENSG00000126067.1	5.3e-32	-0.267942	0.113	0.181	1.07e-27	CD4+_T
ENSG00000115762	5.88e-32	-0.25286	0.083	0.144	1.19e-27	CD4+_T
ENSG00000170860.1	6.19e-32	-0.324217	0.225	0.304	1.25e-27	CD4+_T
ENSG00000143851	7.79e-32	-0.419124	0.165	0.233	1.58e-27	CD4+_T
ENSG00000138069	8.49e-32	-0.257798	0.115	0.185	1.72e-27	CD4+_T
ENSG00000100083	9.28e-32	-0.327122	0.119	0.186	1.88e-27	CD4+_T
ENSG00000109736	1.08e-31	-0.292555	0.086	0.146	2.19e-27	CD4+_T
ENSG00000110031.1	1.13e-31	-0.268991	0.108	0.175	2.29e-27	CD4+_T
ENSG00000152061.1	1.21e-31	-0.405693	0.102	0.163	2.44e-27	CD4+_T
ENSG00000079332	1.73e-31	-0.273645	0.098	0.162	3.5e-27	CD4+_T
ENSG00000169976	3e-31	-0.33897	0.301	0.378	6.07e-27	CD4+_T
ENSG00000205155	3.19e-31	-0.278449	0.101	0.165	6.45e-27	CD4+_T
ENSG00000135506	3.21e-31	-0.252688	0.089	0.151	6.5e-27	CD4+_T
ENSG00000099795.1	3.49e-31	-0.340218	0.252	0.327	7.06e-27	CD4+_T
ENSG00000106400	3.93e-31	-0.317801	0.212	0.29	7.95e-27	CD4+_T
ENSG00000135940.1	4.74e-31	-0.285211	0.525	0.574	9.6e-27	CD4+_T
ENSG00000116489.1	7.46e-31	-0.284987	0.231	0.314	1.51e-26	CD4+_T
ENSG00000047849	9.56e-31	-0.260823	0.094	0.156	1.93e-26	CD4+_T
ENSG00000166333	1.07e-30	-0.27259	0.079	0.136	2.16e-26	CD4+_T
ENSG00000164691	1.32e-30	-0.302819	0.104	0.167	2.66e-26	CD4+_T
ENSG00000108292	1.57e-30	-0.343904	0.111	0.174	3.17e-26	CD4+_T
ENSG00000160799	2.09e-30	-0.340481	0.253	0.326	4.22e-26	CD4+_T
ENSG00000100568	5.11e-30	-0.261735	0.11	0.175	1.03e-25	CD4+_T
ENSG00000144674	6.15e-30	-0.3663	0.23	0.304	1.24e-25	CD4+_T
ENSG00000068912	6.27e-30	-0.289728	0.112	0.177	1.27e-25	CD4+_T
ENSG00000143977.1	8.01e-30	-0.280136	0.43	0.49	1.62e-25	CD4+_T
ENSG00000090266.1	8.38e-30	-0.315731	0.339	0.409	1.7e-25	CD4+_T
ENSG00000072849	8.65e-30	-0.256654	0.09	0.15	1.75e-25	CD4+_T
ENSG00000146278	8.69e-30	-0.504332	0.165	0.229	1.76e-25	CD4+_T
ENSG00000187051	9.28e-30	-0.320068	0.208	0.282	1.88e-25	CD4+_T
ENSG00000189403	1.14e-29	-0.312575	0.701	0.719	2.3e-25	CD4+_T
ENSG00000106588.1	1.28e-29	-0.34	0.38	0.444	2.59e-25	CD4+_T
ENSG00000167397	1.69e-29	-0.258694	0.113	0.178	3.41e-25	CD4+_T
ENSG00000172590.1	1.75e-29	-0.293839	0.176	0.251	3.54e-25	CD4+_T
ENSG00000116741	1.94e-29	-0.296534	0.053	0.1	3.92e-25	CD4+_T
ENSG00000197043	2.71e-29	-0.259434	0.073	0.127	5.49e-25	CD4+_T
ENSG00000180992.1	3.51e-29	-0.278187	0.207	0.282	7.11e-25	CD4+_T
ENSG00000133313.1	4.12e-29	-0.25255	0.121	0.189	8.33e-25	CD4+_T
ENSG00000166794	4.73e-29	-0.380071	0.347	0.407	9.56e-25	CD4+_T
ENSG00000099860	6.27e-29	-0.53531	0.236	0.303	1.27e-24	CD4+_T
ENSG00000163584.1	7.45e-29	-0.397164	0.199	0.268	1.51e-24	CD4+_T
ENSG00000086598	9.27e-29	-0.339327	0.277	0.349	1.87e-24	CD4+_T
ENSG00000160271	1.07e-28	-0.265426	0.053	0.1	2.17e-24	CD4+_T
ENSG00000148362	1.24e-28	-0.376015	0.124	0.184	2.5e-24	CD4+_T
ENSG00000186010.1	1.62e-28	-0.284473	0.408	0.471	3.28e-24	CD4+_T
ENSG00000153048.1	1.8e-28	-0.306757	0.142	0.208	3.63e-24	CD4+_T
ENSG00000125356	3.83e-28	-0.28686	0.445	0.505	7.75e-24	CD4+_T
ENSG00000099341	4.74e-28	-0.287693	0.197	0.269	9.59e-24	CD4+_T
ENSG00000177700	5e-28	-0.329783	0.324	0.392	1.01e-23	CD4+_T
ENSG00000075142.1	9.73e-28	-0.296851	0.229	0.301	1.97e-23	CD4+_T
ENSG00000090263	1.02e-27	0.268274	0.206	0.138	2.06e-23	CD4+_T
ENSG00000007168	1.67e-27	-0.271889	0.133	0.198	3.38e-23	CD4+_T
ENSG00000108953.1	1.88e-27	-0.257473	0.17	0.242	3.81e-23	CD4+_T
ENSG00000026508.1	2.95e-27	-0.577697	0.556	0.568	5.96e-23	CD4+_T
ENSG00000171148	3.31e-27	-0.259479	0.1	0.159	6.69e-23	CD4+_T
ENSG00000264198.1	3.44e-27	-0.35443	0.143	0.204	6.96e-23	CD4+_T
ENSG00000167461	4.92e-27	-0.256747	0.171	0.242	9.97e-23	CD4+_T
ENSG00000127540	5.01e-27	-0.255511	0.622	0.644	1.01e-22	CD4+_T
ENSG00000047365.1	1.09e-26	-0.294694	0.085	0.138	2.21e-22	CD4+_T
ENSG00000041357.1	1.52e-26	-0.305056	0.282	0.353	3.07e-22	CD4+_T
ENSG00000086666.1	1.58e-26	-0.275958	0.139	0.204	3.19e-22	CD4+_T
ENSG00000115307	1.64e-26	-0.256598	0.142	0.208	3.32e-22	CD4+_T
ENSG00000153187	2.25e-26	-0.256983	0.161	0.229	4.56e-22	CD4+_T
ENSG00000166925	2.41e-26	-0.324875	0.212	0.279	4.88e-22	CD4+_T
ENSG00000165169.1	2.83e-26	0.260236	0.227	0.157	5.73e-22	CD4+_T
ENSG00000139597	2.87e-26	-0.315662	0.144	0.207	5.8e-22	CD4+_T
ENSG00000083223	3.33e-26	-0.280884	0.071	0.12	6.73e-22	CD4+_T
ENSG00000213585.1	4.31e-26	-0.324634	0.228	0.297	8.71e-22	CD4+_T
ENSG00000177200	4.32e-26	-0.266194	0.091	0.146	8.75e-22	CD4+_T
ENSG00000108294.1	4.68e-26	-0.28231	0.242	0.313	9.46e-22	CD4+_T
ENSG00000178913.1	5.44e-26	-0.319372	0.297	0.366	1.1e-21	CD4+_T
ENSG00000181817.1	5.99e-26	-0.263877	0.137	0.201	1.21e-21	CD4+_T
ENSG00000142227	7.57e-26	-0.326582	0.565	0.602	1.53e-21	CD4+_T
ENSG00000142507.1	8.46e-26	-0.266054	0.219	0.289	1.71e-21	CD4+_T
ENSG00000147443	1.51e-25	-0.302665	0.07	0.117	3.06e-21	CD4+_T
ENSG00000168385	1.51e-25	-0.255442	0.128	0.19	3.06e-21	CD4+_T
ENSG00000136653	2.39e-25	-0.267509	0.066	0.113	4.84e-21	CD4+_T
ENSG00000077150	2.86e-25	-0.297909	0.127	0.187	5.79e-21	CD4+_T
ENSG00000133321.1	4.06e-25	-0.451077	0.443	0.479	8.22e-21	CD4+_T
ENSG00000162654.1	4.75e-25	-0.393182	0.264	0.331	9.62e-21	CD4+_T
ENSG00000173230	7.4e-25	-0.294871	0.147	0.21	1.5e-20	CD4+_T
ENSG00000145494.1	7.84e-25	-0.264126	0.22	0.289	1.59e-20	CD4+_T
ENSG00000243317	8.59e-25	-0.274701	0.167	0.233	1.74e-20	CD4+_T
ENSG00000134049	1.26e-24	-0.26953	0.16	0.225	2.55e-20	CD4+_T
ENSG00000010404.1	1.98e-24	-0.314313	0.212	0.277	4.02e-20	CD4+_T
ENSG00000058272	2.3e-24	-0.300935	0.158	0.221	4.65e-20	CD4+_T
ENSG00000075785	3.42e-24	-0.267224	0.212	0.28	6.92e-20	CD4+_T
ENSG00000170540	4.02e-24	-0.275137	0.189	0.256	8.14e-20	CD4+_T
ENSG00000100055.1	4.08e-24	-0.303469	0.102	0.154	8.26e-20	CD4+_T
ENSG00000116030	7.46e-24	-0.265542	0.37	0.428	1.51e-19	CD4+_T
ENSG00000073584	9.3e-24	-0.261828	0.138	0.197	1.88e-19	CD4+_T
ENSG00000185651	9.9e-24	-0.2788	0.295	0.364	2e-19	CD4+_T
ENSG00000088832.1	1.42e-23	-0.307747	0.257	0.321	2.88e-19	CD4+_T
ENSG00000245532.1	1.45e-23	-0.476287	0.823	0.805	2.94e-19	CD4+_T
ENSG00000141480.1	1.58e-23	-0.303577	0.134	0.19	3.2e-19	CD4+_T
ENSG00000161960.1	1.61e-23	-0.309502	0.468	0.511	3.25e-19	CD4+_T
ENSG00000154451.1	2.36e-23	-0.406778	0.368	0.428	4.78e-19	CD4+_T
ENSG00000166595	5.43e-23	-0.258198	0.245	0.314	1.1e-18	CD4+_T
ENSG00000111639.1	5.59e-23	-0.263362	0.206	0.273	1.13e-18	CD4+_T
ENSG00000100461	6.44e-23	-0.296789	0.194	0.258	1.3e-18	CD4+_T
ENSG00000175197	7.76e-23	-0.283708	0.11	0.164	1.57e-18	CD4+_T
ENSG00000068079.1	8.93e-23	-0.32104	0.29	0.357	1.81e-18	CD4+_T
ENSG00000233276	1.31e-22	-0.754934	0.208	0.262	2.65e-18	CD4+_T
ENSG00000217555.1	1.34e-22	-0.354932	0.198	0.253	2.71e-18	CD4+_T
ENSG00000155957	1.6e-22	-0.285365	0.268	0.333	3.24e-18	CD4+_T
ENSG00000102317.1	2.22e-22	-0.286439	0.287	0.352	4.48e-18	CD4+_T
ENSG00000106052.1	3.29e-22	-0.304311	0.326	0.385	6.65e-18	CD4+_T
ENSG00000156256	4.17e-22	-0.269328	0.211	0.276	8.43e-18	CD4+_T
ENSG00000106244.1	4.56e-22	-0.266379	0.195	0.259	9.24e-18	CD4+_T
ENSG00000114423	4.89e-22	-0.273456	0.063	0.105	9.9e-18	CD4+_T
ENSG00000170296	5.18e-22	-0.290852	0.164	0.223	1.05e-17	CD4+_T
ENSG00000174720	5.32e-22	-0.261679	0.148	0.208	1.08e-17	CD4+_T
ENSG00000172922.1	5.64e-22	-0.253881	0.15	0.21	1.14e-17	CD4+_T
ENSG00000091640	5.84e-22	-0.254641	0.15	0.209	1.18e-17	CD4+_T
ENSG00000087088	7.6e-22	-0.255748	0.175	0.238	1.54e-17	CD4+_T
ENSG00000183291	8e-22	-0.27864	0.337	0.398	1.62e-17	CD4+_T
ENSG00000125347	8.18e-22	-0.368881	0.69	0.704	1.66e-17	CD4+_T
ENSG00000103490	9.62e-22	-0.253606	0.085	0.132	1.95e-17	CD4+_T
ENSG00000125995.1	1e-21	-0.256073	0.247	0.314	2.03e-17	CD4+_T
ENSG00000184076	1.16e-21	-0.272532	0.422	0.472	2.34e-17	CD4+_T
ENSG00000198856	1.22e-21	-0.295061	0.24	0.301	2.47e-17	CD4+_T
ENSG00000140030	1.75e-21	-0.268416	0.098	0.147	3.54e-17	CD4+_T
ENSG00000170776	2.87e-21	-0.300563	0.248	0.308	5.8e-17	CD4+_T
ENSG00000177105	4.3e-21	-0.285741	0.232	0.294	8.7e-17	CD4+_T
ENSG00000177156	5.75e-21	-0.25722	0.127	0.183	1.16e-16	CD4+_T
ENSG00000119655.1	7.82e-21	-0.643855	0.258	0.304	1.58e-16	CD4+_T
ENSG00000135114	8.84e-21	-0.31751	0.21	0.27	1.79e-16	CD4+_T
ENSG00000167552	9.64e-21	-0.321755	0.112	0.163	1.95e-16	CD4+_T
ENSG00000197956.1	1.22e-20	-0.661144	0.73	0.708	2.47e-16	CD4+_T
ENSG00000139725	1.32e-20	-0.282777	0.144	0.198	2.67e-16	CD4+_T
ENSG00000117228	1.35e-20	-0.634559	0.438	0.473	2.73e-16	CD4+_T
ENSG00000109046	1.56e-20	-0.344216	0.315	0.37	3.17e-16	CD4+_T
ENSG00000172183.1	1.99e-20	-0.30764	0.675	0.685	4.04e-16	CD4+_T
ENSG00000116171	2.44e-20	-0.251381	0.132	0.184	4.94e-16	CD4+_T
ENSG00000128340.1	2.76e-20	-0.309814	0.396	0.438	5.59e-16	CD4+_T
ENSG00000072786	3.13e-20	-0.264144	0.074	0.116	6.33e-16	CD4+_T
ENSG00000240972.1	3.69e-20	-0.277322	0.698	0.692	7.47e-16	CD4+_T
ENSG00000148834	4.57e-20	-0.290887	0.216	0.274	9.26e-16	CD4+_T
ENSG00000173221	4.77e-20	-0.358786	0.277	0.329	9.65e-16	CD4+_T
ENSG00000074800	6.45e-20	-0.301345	0.737	0.731	1.31e-15	CD4+_T
ENSG00000119335.1	6.7e-20	-0.277707	0.231	0.291	1.36e-15	CD4+_T
ENSG00000131495	6.87e-20	-0.261232	0.237	0.298	1.39e-15	CD4+_T
ENSG00000196230.1	8.1e-20	-0.321099	0.367	0.41	1.64e-15	CD4+_T
ENSG00000156127	1.22e-19	-0.320868	0.184	0.24	2.47e-15	CD4+_T
ENSG00000104765	2.62e-19	-0.36541	0.399	0.442	5.31e-15	CD4+_T
ENSG00000168214	2.97e-19	-0.308779	0.256	0.313	6e-15	CD4+_T
ENSG00000115232	5.94e-19	-0.28133	0.102	0.147	1.2e-14	CD4+_T
ENSG00000140612	7.96e-19	-0.266374	0.227	0.284	1.61e-14	CD4+_T
ENSG00000168899	1.04e-18	-0.364672	0.283	0.33	2.11e-14	CD4+_T
ENSG00000236943	2.09e-18	-0.275919	0.094	0.137	4.23e-14	CD4+_T
ENSG00000005483	2.76e-18	-0.294354	0.525	0.556	5.59e-14	CD4+_T
ENSG00000168209	2.9e-18	-0.259849	0.089	0.134	5.88e-14	CD4+_T
ENSG00000186517	3.78e-18	-0.276037	0.193	0.246	7.66e-14	CD4+_T
ENSG00000132965.1	6.83e-18	-0.480126	0.253	0.294	1.38e-13	CD4+_T
ENSG00000204472	8.24e-18	-0.358257	0.063	0.1	1.67e-13	CD4+_T
ENSG00000196141.1	5.98e-17	0.257674	0.143	0.098	1.21e-12	CD4+_T
ENSG00000213928	7.35e-17	-0.313031	0.287	0.335	1.49e-12	CD4+_T
ENSG00000144224	7.95e-17	-0.271484	0.289	0.341	1.61e-12	CD4+_T
ENSG00000154518.1	1.84e-16	-0.257688	0.34	0.383	3.72e-12	CD4+_T
ENSG00000122884	2.82e-16	-0.250324	0.184	0.236	5.7e-12	CD4+_T
ENSG00000159111	3.04e-16	-0.25445	0.086	0.124	6.15e-12	CD4+_T
ENSG00000131171.1	4.3e-16	-0.264232	0.279	0.329	8.7e-12	CD4+_T
ENSG00000100612	7.72e-16	-0.253691	0.131	0.175	1.56e-11	CD4+_T
ENSG00000206573	8.8e-16	-0.260869	0.37	0.419	1.78e-11	CD4+_T
ENSG00000134186	2.05e-15	-0.273369	0.33	0.375	4.15e-11	CD4+_T
ENSG00000130770	2.16e-15	-0.319375	0.354	0.39	4.36e-11	CD4+_T
ENSG00000067167	3.06e-15	-0.25208	0.241	0.291	6.19e-11	CD4+_T
ENSG00000110848.1	3.5e-15	-0.514767	0.348	0.384	7.08e-11	CD4+_T
ENSG00000137193.1	4.88e-15	-0.308339	0.153	0.197	9.87e-11	CD4+_T
ENSG00000145287.1	9.96e-15	-0.443006	0.446	0.461	2.02e-10	CD4+_T
ENSG00000254505	1.61e-14	-0.266253	0.393	0.433	3.27e-10	CD4+_T
ENSG00000117450.1	1.64e-14	-0.312291	0.173	0.219	3.31e-10	CD4+_T
ENSG00000128590.1	2.55e-14	-0.251265	0.133	0.174	5.16e-10	CD4+_T
ENSG00000229807	5.49e-14	-0.310432	0.154	0.195	1.11e-09	CD4+_T
ENSG00000168610	6.1e-14	-0.259844	0.328	0.369	1.23e-09	CD4+_T
ENSG00000204261	7.8e-14	-0.264741	0.208	0.252	1.58e-09	CD4+_T
ENSG00000152818	2.78e-13	-0.299829	0.134	0.171	5.63e-09	CD4+_T
ENSG00000198624	5.23e-13	-0.254552	0.138	0.177	1.06e-08	CD4+_T
ENSG00000132530	6.3e-13	-0.286687	0.373	0.416	1.28e-08	CD4+_T
ENSG00000187193.1	9.1e-13	-1.2279	0.165	0.201	1.84e-08	CD4+_T
ENSG00000173821.1	1.21e-11	-0.259514	0.6	0.621	2.45e-07	CD4+_T
ENSG00000197471.1	1.9e-11	-0.271191	0.126	0.159	3.84e-07	CD4+_T
ENSG00000027075.1	2.75e-11	-0.290633	0.118	0.15	5.56e-07	CD4+_T
ENSG00000118515	3.57e-11	-0.313274	0.076	0.106	7.22e-07	CD4+_T
ENSG00000167468	8.72e-10	-0.422447	0.551	0.524	1.76e-05	CD4+_T
ENSG00000169245.1	9.24e-10	-1.12754	0.118	0.15	1.87e-05	CD4+_T
ENSG00000153283.1	1.01e-09	-0.283161	0.175	0.204	2.05e-05	CD4+_T
ENSG00000100300	8.06e-09	-0.323044	0.263	0.291	0.000163017	CD4+_T
ENSG00000198821.1	1.9e-08	-0.519496	0.339	0.333	0.000384116	CD4+_T
ENSG00000173559	2.18e-08	-0.312659	0.2	0.231	0.000441049	CD4+_T
ENSG00000102879.1	3.44e-07	-0.261139	0.439	0.439	0.00696626	CD4+_T
ENSG00000074966.1	3.55e-07	-0.346274	0.095	0.116	0.00718594	CD4+_T
ENSG00000090104.1	5.99e-07	0.308505	0.296	0.263	0.0121134	CD4+_T
ENSG00000169442.1	1.63e-06	-0.292391	0.601	0.493	0.0330514	CD4+_T
ENSG00000183918.1	2.2e-06	-0.296385	0.164	0.181	0.0446024	CD4+_T
ENSG00000161570.2	0	2.04076	0.785	0.283	0	CD8+_T
ENSG00000172116.2	0	1.89158	0.527	0.069	0	CD8+_T
ENSG00000145220.2	0	1.76502	0.541	0.135	0	CD8+_T
ENSG00000100450.1	0	1.61078	0.31	0.053	0	CD8+_T
ENSG00000113088.1	0	1.55202	0.285	0.039	0	CD8+_T
ENSG00000139187.1	0	1.34945	0.299	0.042	0	CD8+_T
ENSG00000256039.1	0	1.28717	0.246	0.008	0	CD8+_T
ENSG00000105374.2	0	1.26403	0.621	0.203	0	CD8+_T
ENSG00000077984.2	0	1.18257	0.597	0.209	0	CD8+_T
ENSG00000187118.2	4.72e-305	1.89255	0.49	0.17	9.55e-301	CD8+_T
ENSG00000153563	1.66e-294	0.978297	0.203	0.023	3.37e-290	CD8+_T
ENSG00000198804.1	1.57e-264	0.512806	1	0.997	3.18e-260	CD8+_T
ENSG00000198938.2	7.99e-218	0.568544	0.998	0.992	1.62e-213	CD8+_T
ENSG00000198712.2	6.07e-182	0.502252	0.997	0.988	1.23e-177	CD8+_T
ENSG00000235576.2	2.6e-181	1.07793	0.344	0.118	5.27e-177	CD8+_T
ENSG00000137441.1	1.09e-159	1.03703	0.183	0.038	2.2e-155	CD8+_T
ENSG00000182463.2	6.32e-159	-1.36418	0.04	0.312	1.28e-154	CD8+_T
ENSG00000145649.2	6.88e-149	0.569952	0.342	0.12	1.39e-144	CD8+_T
ENSG00000116667.1	1.23e-148	0.879236	0.224	0.061	2.48e-144	CD8+_T
ENSG00000164483.2	2.79e-142	0.83505	0.268	0.088	5.64e-138	CD8+_T
ENSG00000070756.2	3.08e-141	-0.911698	0.791	0.894	6.23e-137	CD8+_T
ENSG00000167286.2	2.92e-134	0.747853	0.724	0.52	5.9e-130	CD8+_T
ENSG00000116824.1	5.77e-130	0.731789	0.753	0.563	1.17e-125	CD8+_T
ENSG00000089692	1.04e-126	0.747064	0.171	0.043	2.1e-122	CD8+_T
ENSG00000008517.1	7.22e-125	0.49413	0.858	0.635	1.46e-120	CD8+_T
ENSG00000169442.2	4.12e-122	0.984385	0.71	0.532	8.34e-118	CD8+_T
ENSG00000142347.2	1.33e-116	0.923089	0.316	0.137	2.69e-112	CD8+_T
ENSG00000197540.2	2.63e-116	0.836879	0.328	0.147	5.33e-112	CD8+_T
ENSG00000229474.1	1.11e-115	0.956187	0.199	0.062	2.24e-111	CD8+_T
ENSG00000198727.2	6.28e-115	0.526148	0.967	0.952	1.27e-110	CD8+_T
ENSG00000126264.2	2.32e-114	0.880937	0.452	0.253	4.7e-110	CD8+_T
ENSG00000126353.1	4.69e-109	-0.842714	0.265	0.533	9.49e-105	CD8+_T
ENSG00000198899.2	2.86e-106	0.429357	0.983	0.971	5.78e-102	CD8+_T
ENSG00000196154.1	8.73e-106	0.822477	0.537	0.34	1.77e-101	CD8+_T
ENSG00000172543.2	1.73e-103	0.612502	0.273	0.107	3.5e-99	CD8+_T
ENSG00000115523.2	7.59e-102	-0.41971	0.502	0.268	1.54e-97	CD8+_T
ENSG00000198886.2	8.05e-100	0.385765	0.993	0.986	1.63e-95	CD8+_T
ENSG00000133112.2	2.04e-97	-0.294774	0.995	0.997	4.13e-93	CD8+_T
ENSG00000163564.2	5.64e-93	0.771885	0.359	0.189	1.14e-88	CD8+_T
ENSG00000186810	1.43e-92	0.539549	0.12	0.028	2.89e-88	CD8+_T
ENSG00000160654.1	6.3e-91	0.864139	0.38	0.217	1.28e-86	CD8+_T
ENSG00000142669.1	9.25e-88	0.520638	0.795	0.703	1.87e-83	CD8+_T
ENSG00000147403.1	4.85e-85	-0.263129	1	0.999	9.82e-81	CD8+_T
ENSG00000163508	6.05e-84	0.481809	0.101	0.022	1.22e-79	CD8+_T
ENSG00000110700.1	2.91e-81	-0.328656	0.994	0.985	5.89e-77	CD8+_T
ENSG00000198888.2	3.83e-81	0.379392	0.973	0.958	7.75e-77	CD8+_T
ENSG00000081237.1	4.17e-81	0.501658	0.85	0.775	8.44e-77	CD8+_T
ENSG00000198851.2	1.4e-76	0.631815	0.556	0.405	2.83e-72	CD8+_T
ENSG00000142937.2	5.37e-74	-0.322369	0.993	0.989	1.09e-69	CD8+_T
ENSG00000198763.2	1.38e-72	0.374569	0.989	0.979	2.8e-68	CD8+_T
ENSG00000188404.1	9.15e-71	-0.634122	0.22	0.425	1.85e-66	CD8+_T
ENSG00000239713.1	6.48e-70	0.642873	0.376	0.222	1.31e-65	CD8+_T
ENSG00000183918.2	2.5e-68	0.709203	0.283	0.151	5.05e-64	CD8+_T
ENSG00000223865.2	9.7e-68	0.28491	0.369	0.203	1.96e-63	CD8+_T
ENSG00000134539.2	1.11e-62	0.504812	0.246	0.114	2.24e-58	CD8+_T
ENSG00000111863.2	1.96e-61	-0.660271	0.039	0.172	3.97e-57	CD8+_T
ENSG00000116251.1	3.06e-61	-0.32219	0.93	0.954	6.2e-57	CD8+_T
ENSG00000133321.2	5.68e-56	0.516231	0.563	0.438	1.15e-51	CD8+_T
ENSG00000163682.1	8.35e-56	-0.253882	0.995	0.988	1.69e-51	CD8+_T
ENSG00000198786.2	2.16e-55	0.428944	0.79	0.729	4.37e-51	CD8+_T
ENSG00000134460.1	3.36e-53	-0.89531	0.011	0.114	6.8e-49	CD8+_T
ENSG00000186827	4.74e-53	-0.823579	0.006	0.105	9.59e-49	CD8+_T
ENSG00000197958.1	2.17e-52	-0.263404	0.99	0.984	4.39e-48	CD8+_T
ENSG00000078304.1	1.4e-51	0.573677	0.514	0.401	2.83e-47	CD8+_T
ENSG00000145779	5.4e-51	-0.505355	0.185	0.356	1.09e-46	CD8+_T
ENSG00000102524	4.73e-50	-0.757427	0.057	0.18	9.58e-46	CD8+_T
ENSG00000173198.1	8.25e-50	-0.488564	0.019	0.124	1.67e-45	CD8+_T
ENSG00000187109.1	1.89e-49	-0.390541	0.67	0.814	3.82e-45	CD8+_T
ENSG00000189403.1	2.83e-49	0.439189	0.751	0.7	5.74e-45	CD8+_T
ENSG00000010810.2	4.67e-49	0.565424	0.37	0.247	9.44e-45	CD8+_T
ENSG00000225783.2	1.15e-47	0.575659	0.31	0.192	2.33e-43	CD8+_T
ENSG00000095794	2.39e-46	-0.66622	0.163	0.315	4.83e-42	CD8+_T
ENSG00000083845.2	1.95e-45	-0.2558	0.965	0.96	3.94e-41	CD8+_T
ENSG00000112149.2	6.26e-45	-0.831187	0.032	0.134	1.27e-40	CD8+_T
ENSG00000158869.2	8.92e-44	-1.7312	0.061	0.168	1.81e-39	CD8+_T
ENSG00000198840.1	1.57e-43	0.253125	0.987	0.976	3.18e-39	CD8+_T
ENSG00000121858	2.03e-43	-0.677293	0.212	0.364	4.11e-39	CD8+_T
ENSG00000135046.1	3.92e-41	0.469906	0.52	0.412	7.94e-37	CD8+_T
ENSG00000169245.2	7.71e-41	-1.77751	0.045	0.146	1.56e-36	CD8+_T
ENSG00000140105.2	1.2e-40	-0.540214	0.062	0.173	2.43e-36	CD8+_T
ENSG00000154589.1	1.37e-40	-0.447289	0.07	0.183	2.77e-36	CD8+_T
ENSG00000181847.2	1.58e-40	0.472691	0.186	0.094	3.2e-36	CD8+_T
ENSG00000150347.1	5.83e-40	-0.4427	0.25	0.418	1.18e-35	CD8+_T
ENSG00000130066.1	2.5e-39	-0.804715	0.544	0.67	5.05e-35	CD8+_T
ENSG00000114942.2	2.96e-39	-0.322202	0.807	0.874	5.98e-35	CD8+_T
ENSG00000105835.1	1.33e-38	-0.75149	0.047	0.148	2.7e-34	CD8+_T
ENSG00000140511	5.33e-38	-0.500504	0.105	0.223	1.08e-33	CD8+_T
ENSG00000137959	1.87e-37	-0.436369	0.36	0.519	3.77e-33	CD8+_T
ENSG00000234883.2	9.2e-37	-0.928697	0.048	0.143	1.86e-32	CD8+_T
ENSG00000132002.1	1.31e-36	-0.48747	0.041	0.134	2.65e-32	CD8+_T
ENSG00000115232.1	1.94e-36	0.502304	0.191	0.106	3.92e-32	CD8+_T
ENSG00000089157.2	2.05e-36	-0.266508	0.941	0.948	4.16e-32	CD8+_T
ENSG00000197728.1	2.28e-36	-0.318813	0.844	0.91	4.6e-32	CD8+_T
ENSG00000119655.2	6.01e-36	-0.584189	0.165	0.296	1.22e-31	CD8+_T
ENSG00000133106.1	1.37e-35	-0.444526	0.294	0.447	2.76e-31	CD8+_T
ENSG00000111669.2	4.1e-35	-0.339422	0.681	0.802	8.3e-31	CD8+_T
ENSG00000137575.1	3.89e-34	-0.463331	0.13	0.25	7.87e-30	CD8+_T
ENSG00000101474.1	6.22e-34	0.432338	0.148	0.075	1.26e-29	CD8+_T
ENSG00000145287.2	6.97e-34	-0.531174	0.335	0.473	1.41e-29	CD8+_T
ENSG00000131981.1	7.95e-33	-0.798737	0.063	0.158	1.61e-28	CD8+_T
ENSG00000100906.1	8.36e-33	-0.669126	0.089	0.192	1.69e-28	CD8+_T
ENSG00000180817	9.05e-33	-0.433782	0.207	0.342	1.83e-28	CD8+_T
ENSG00000122545.1	1.56e-32	0.469294	0.535	0.471	3.16e-28	CD8+_T
ENSG00000066294	5.44e-32	0.491698	0.153	0.081	1.1e-27	CD8+_T
ENSG00000182866.1	1.1e-31	0.440886	0.413	0.32	2.24e-27	CD8+_T
ENSG00000134242	3.91e-31	0.376935	0.1	0.043	7.92e-27	CD8+_T
ENSG00000189283.2	9.05e-31	-0.354981	0.033	0.112	1.83e-26	CD8+_T
ENSG00000104408.2	1.13e-30	-0.326166	0.67	0.786	2.28e-26	CD8+_T
ENSG00000227507.2	1.57e-30	-0.382562	0.093	0.195	3.17e-26	CD8+_T
ENSG00000062716.1	1.98e-30	-0.351139	0.217	0.357	4e-26	CD8+_T
ENSG00000136213.1	6.07e-30	0.471705	0.312	0.221	1.23e-25	CD8+_T
ENSG00000100351.1	7.79e-30	0.441852	0.188	0.111	1.58e-25	CD8+_T
ENSG00000166920.2	1.1e-29	-2.04802	0.071	0.159	2.23e-25	CD8+_T
ENSG00000123416.2	1.32e-29	-0.590707	0.154	0.269	2.67e-25	CD8+_T
ENSG00000111348	1.61e-29	0.333817	0.692	0.637	3.25e-25	CD8+_T
ENSG00000167996.2	1.7e-29	-1.59359	0.387	0.523	3.44e-25	CD8+_T
ENSG00000065911.1	1.8e-29	-0.330673	0.073	0.169	3.64e-25	CD8+_T
ENSG00000237943.2	1.93e-29	-0.386317	0.209	0.335	3.91e-25	CD8+_T
ENSG00000100644.1	1.94e-29	-0.393866	0.115	0.221	3.93e-25	CD8+_T
ENSG00000184182.1	1.1e-28	-0.464679	0.055	0.14	2.23e-24	CD8+_T
ENSG00000181163.1	1.67e-28	-0.277519	0.82	0.871	3.37e-24	CD8+_T
ENSG00000006451	3.47e-28	-0.307719	0.112	0.219	7.02e-24	CD8+_T
ENSG00000026025.1	6.44e-28	-0.707048	0.21	0.329	1.3e-23	CD8+_T
ENSG00000111716.2	8.22e-28	-0.34892	0.515	0.644	1.66e-23	CD8+_T
ENSG00000129824.2	9.18e-28	-0.317891	0.3	0.443	1.86e-23	CD8+_T
ENSG00000100453.2	2.09e-27	-1.31082	0.282	0.177	4.23e-23	CD8+_T
ENSG00000115935.2	2.87e-27	0.410656	0.498	0.434	5.81e-23	CD8+_T
ENSG00000164733.1	3e-27	-0.629432	0.057	0.139	6.08e-23	CD8+_T
ENSG00000131018	3.54e-27	0.433197	0.148	0.082	7.17e-23	CD8+_T
ENSG00000168961.1	3.96e-27	-0.331757	0.073	0.163	8.01e-23	CD8+_T
ENSG00000196843	1.99e-26	-0.306279	0.184	0.305	4.03e-22	CD8+_T
ENSG00000169508	2.24e-26	-0.32766	0.149	0.262	4.54e-22	CD8+_T
ENSG00000137331.2	3.01e-26	-0.781989	0.04	0.112	6.08e-22	CD8+_T
ENSG00000136997.1	4.46e-26	-0.382002	0.126	0.224	9.03e-22	CD8+_T
ENSG00000109861.2	9.86e-26	0.419781	0.194	0.121	2e-21	CD8+_T
ENSG00000140988.2	1.53e-25	-0.295437	0.596	0.726	3.1e-21	CD8+_T
ENSG00000163466.2	1.82e-25	0.287909	0.74	0.703	3.68e-21	CD8+_T
ENSG00000109320.1	2.27e-25	-0.34819	0.043	0.115	4.6e-21	CD8+_T
ENSG00000131669.1	2.42e-25	-0.661464	0.06	0.138	4.9e-21	CD8+_T
ENSG00000102144.1	3.31e-25	-0.335274	0.399	0.535	6.7e-21	CD8+_T
ENSG00000102265.2	3.98e-25	-0.583802	0.071	0.153	8.06e-21	CD8+_T
ENSG00000069974.1	5.01e-25	0.432355	0.208	0.136	1.01e-20	CD8+_T
ENSG00000168209.1	5.23e-25	-0.392594	0.044	0.118	1.06e-20	CD8+_T
ENSG00000148362.1	5.59e-25	0.412284	0.21	0.136	1.13e-20	CD8+_T
ENSG00000177311.1	5.92e-25	0.440425	0.146	0.084	1.2e-20	CD8+_T
ENSG00000088179	1.86e-24	0.330666	0.114	0.058	3.77e-20	CD8+_T
ENSG00000087074.2	1.97e-24	-0.405579	0.08	0.164	3.98e-20	CD8+_T
ENSG00000122643.1	3.4e-24	-0.397556	0.258	0.378	6.87e-20	CD8+_T
ENSG00000213402	5.71e-24	0.425644	0.42	0.353	1.16e-19	CD8+_T
ENSG00000091317.2	6.27e-24	-0.337695	0.107	0.201	1.27e-19	CD8+_T
ENSG00000177556.1	9.54e-24	-0.411688	0.098	0.186	1.93e-19	CD8+_T
ENSG00000089327.2	1.73e-23	-0.262963	0.569	0.702	3.51e-19	CD8+_T
ENSG00000165732.1	2.38e-23	-0.297938	0.166	0.275	4.81e-19	CD8+_T
ENSG00000172005.2	2.72e-23	-0.318193	0.047	0.114	5.5e-19	CD8+_T
ENSG00000077238	2.79e-23	-0.288494	0.058	0.133	5.65e-19	CD8+_T
ENSG00000187608	3.16e-23	-0.585243	0.535	0.631	6.39e-19	CD8+_T
ENSG00000112096.1	3.93e-23	-1.56101	0.17	0.267	7.96e-19	CD8+_T
ENSG00000115165	1.35e-22	-0.328231	0.369	0.507	2.73e-18	CD8+_T
ENSG00000056558.1	1.51e-22	-0.291995	0.053	0.125	3.05e-18	CD8+_T
ENSG00000171490.1	1.71e-22	-0.276608	0.295	0.426	3.46e-18	CD8+_T
ENSG00000119917	2.15e-22	-0.325154	0.369	0.492	4.35e-18	CD8+_T
ENSG00000169756.1	3.23e-22	-0.285673	0.074	0.154	6.54e-18	CD8+_T
ENSG00000067225.2	3.27e-22	-0.334954	0.409	0.539	6.62e-18	CD8+_T
ENSG00000204287.2	3.81e-22	-1.41863	0.092	0.165	7.7e-18	CD8+_T
ENSG00000102096	7.32e-22	-0.329516	0.172	0.274	1.48e-17	CD8+_T
ENSG00000069493	7.63e-22	0.374977	0.385	0.313	1.54e-17	CD8+_T
ENSG00000177410.1	8.43e-22	-0.29174	0.639	0.758	1.71e-17	CD8+_T
ENSG00000196396.1	1.08e-21	-0.282112	0.161	0.265	2.19e-17	CD8+_T
ENSG00000128272.1	1.14e-21	-0.296193	0.217	0.332	2.31e-17	CD8+_T
ENSG00000117228.1	1.22e-21	-0.458738	0.351	0.47	2.47e-17	CD8+_T
ENSG00000162645	1.43e-21	-0.296296	0.549	0.675	2.89e-17	CD8+_T
ENSG00000028277.1	1.82e-21	-0.302571	0.073	0.149	3.68e-17	CD8+_T
ENSG00000171476.2	3.42e-21	0.255128	0.179	0.108	6.91e-17	CD8+_T
ENSG00000142089.1	5.04e-21	-0.742757	0.149	0.235	1.02e-16	CD8+_T
ENSG00000240972.2	7.55e-21	-0.253664	0.599	0.713	1.53e-16	CD8+_T
ENSG00000106948.1	1.36e-20	0.479403	0.241	0.176	2.75e-16	CD8+_T
ENSG00000265206.2	2.28e-20	0.427085	0.406	0.347	4.61e-16	CD8+_T
ENSG00000096384.1	2.9e-20	-0.337956	0.369	0.496	5.88e-16	CD8+_T
ENSG00000072818	3.28e-20	0.342494	0.452	0.395	6.64e-16	CD8+_T
ENSG00000129277.2	8.02e-20	-1.81459	0.346	0.25	1.62e-15	CD8+_T
ENSG00000059804.1	8.21e-20	-0.378818	0.119	0.203	1.66e-15	CD8+_T
ENSG00000069667.1	1.82e-19	0.393543	0.409	0.343	3.68e-15	CD8+_T
ENSG00000172673	2.8e-19	0.303736	0.109	0.06	5.68e-15	CD8+_T
ENSG00000213145	2.87e-19	0.380724	0.379	0.317	5.81e-15	CD8+_T
ENSG00000133872.2	3.43e-19	-0.291049	0.727	0.795	6.93e-15	CD8+_T
ENSG00000122224	3.99e-19	0.382817	0.119	0.069	8.07e-15	CD8+_T
ENSG00000178035.1	4.8e-19	-0.251086	0.133	0.219	9.71e-15	CD8+_T
ENSG00000143669.2	7.4e-19	0.357769	0.2	0.135	1.5e-14	CD8+_T
ENSG00000149311.1	1.08e-18	0.362786	0.388	0.329	2.18e-14	CD8+_T
ENSG00000102879.2	2.5e-18	0.353634	0.483	0.431	5.06e-14	CD8+_T
ENSG00000116679.1	2.5e-18	-0.318078	0.075	0.145	5.06e-14	CD8+_T
ENSG00000222041.1	2.75e-18	0.409949	0.21	0.148	5.56e-14	CD8+_T
ENSG00000198604	2.93e-18	-0.252813	0.269	0.381	5.93e-14	CD8+_T
ENSG00000009790	4.77e-18	0.399885	0.321	0.259	9.65e-14	CD8+_T
ENSG00000179218.1	5.72e-18	-0.328169	0.196	0.291	1.16e-13	CD8+_T
ENSG00000159111.1	7.64e-18	0.358765	0.146	0.092	1.55e-13	CD8+_T
ENSG00000138795.2	8.84e-18	-0.278469	0.069	0.132	1.79e-13	CD8+_T
ENSG00000213626.1	1.4e-17	0.355238	0.333	0.268	2.83e-13	CD8+_T
ENSG00000059588.2	1.46e-17	-0.350094	0.073	0.137	2.96e-13	CD8+_T
ENSG00000204387.2	1.87e-17	-0.256857	0.538	0.648	3.78e-13	CD8+_T
ENSG00000110934.2	1.92e-17	0.383128	0.309	0.249	3.89e-13	CD8+_T
ENSG00000163600.2	2.33e-17	-0.258201	0.059	0.121	4.72e-13	CD8+_T
ENSG00000002549.2	5.87e-17	-0.297458	0.146	0.229	1.19e-12	CD8+_T
ENSG00000100911.2	1.52e-16	-0.310168	0.397	0.503	3.07e-12	CD8+_T
ENSG00000159388.1	2.45e-16	-0.279951	0.191	0.285	4.96e-12	CD8+_T
ENSG00000108654	3.32e-16	0.271285	0.681	0.676	6.71e-12	CD8+_T
ENSG00000162654.2	4.18e-16	-0.28045	0.212	0.304	8.46e-12	CD8+_T
ENSG00000158985.1	4.64e-16	0.286591	0.577	0.553	9.4e-12	CD8+_T
ENSG00000144381.1	4.81e-16	-0.259643	0.159	0.243	9.73e-12	CD8+_T
ENSG00000011600.2	5.2e-16	-0.884385	0.122	0.189	1.05e-11	CD8+_T
ENSG00000117289.1	6.81e-16	0.362453	0.501	0.462	1.38e-11	CD8+_T
ENSG00000233276.1	1.03e-15	-0.483691	0.162	0.241	2.08e-11	CD8+_T
ENSG00000167468.1	1.06e-15	-0.338989	0.44	0.559	2.15e-11	CD8+_T
ENSG00000173559.1	2.09e-15	-0.281643	0.144	0.224	4.24e-11	CD8+_T
ENSG00000139112.1	2.53e-15	0.312863	0.118	0.073	5.13e-11	CD8+_T
ENSG00000101082.1	2.59e-15	0.306679	0.125	0.077	5.24e-11	CD8+_T
ENSG00000023445.1	3.53e-15	-0.414878	0.353	0.457	7.15e-11	CD8+_T
ENSG00000090104.2	3.75e-15	-0.414804	0.214	0.296	7.59e-11	CD8+_T
ENSG00000169554.1	4.68e-15	0.374126	0.142	0.093	9.48e-11	CD8+_T
ENSG00000197746.2	5.39e-15	-0.600213	0.115	0.183	1.09e-10	CD8+_T
ENSG00000134186.1	5.95e-15	0.335347	0.385	0.341	1.2e-10	CD8+_T
ENSG00000140379.1	7.75e-15	-0.611104	0.065	0.12	1.57e-10	CD8+_T
ENSG00000119922	1.05e-14	-0.289032	0.226	0.313	2.13e-10	CD8+_T
ENSG00000132432.1	1.13e-14	-0.367309	0.417	0.515	2.29e-10	CD8+_T
ENSG00000110324.2	1.33e-14	0.36833	0.254	0.201	2.69e-10	CD8+_T
ENSG00000121579.1	1.45e-14	0.341561	0.13	0.085	2.94e-10	CD8+_T
ENSG00000185862	2.04e-14	0.294709	0.431	0.38	4.14e-10	CD8+_T
ENSG00000100242	2.15e-14	0.32159	0.127	0.082	4.35e-10	CD8+_T
ENSG00000086061.2	2.72e-14	-0.257603	0.194	0.28	5.5e-10	CD8+_T
ENSG00000155307.1	2.9e-14	-0.33368	0.188	0.269	5.88e-10	CD8+_T
ENSG00000173221.1	2.93e-14	-0.29784	0.223	0.31	5.92e-10	CD8+_T
ENSG00000237945.1	4.97e-14	0.352974	0.168	0.119	1.01e-09	CD8+_T
ENSG00000145675.1	8.13e-14	0.317115	0.173	0.122	1.65e-09	CD8+_T
ENSG00000163191.1	8.26e-14	-0.651218	0.42	0.501	1.67e-09	CD8+_T
ENSG00000179344.2	2.04e-13	-0.340471	0.055	0.105	4.13e-09	CD8+_T
ENSG00000117450.2	2.29e-13	-0.253231	0.131	0.202	4.64e-09	CD8+_T
ENSG00000099860.1	6.36e-13	-0.322209	0.194	0.274	1.29e-08	CD8+_T
ENSG00000044574.1	1.11e-12	-0.492993	0.178	0.251	2.24e-08	CD8+_T
ENSG00000074966.2	1.17e-12	-0.290478	0.063	0.111	2.37e-08	CD8+_T
ENSG00000220205.1	1.17e-12	0.295588	0.481	0.454	2.37e-08	CD8+_T
ENSG00000005844.1	2.06e-12	0.301819	0.109	0.07	4.18e-08	CD8+_T
ENSG00000197471.2	2.28e-12	0.333199	0.179	0.132	4.62e-08	CD8+_T
ENSG00000110848.2	4.54e-12	-0.422917	0.292	0.374	9.18e-08	CD8+_T
ENSG00000163131.1	6.74e-12	-0.493418	0.259	0.342	1.36e-07	CD8+_T
ENSG00000100083.1	8.31e-12	0.367711	0.183	0.138	1.68e-07	CD8+_T
ENSG00000118503.1	1.3e-11	-0.361077	0.114	0.172	2.62e-07	CD8+_T
ENSG00000264198.2	1.91e-11	0.315592	0.206	0.159	3.87e-07	CD8+_T
ENSG00000118680	2.63e-11	0.307049	0.507	0.5	5.33e-07	CD8+_T
ENSG00000217555.2	2.66e-11	0.308734	0.258	0.212	5.38e-07	CD8+_T
ENSG00000182718.2	2.99e-11	-0.273785	0.11	0.168	6.06e-07	CD8+_T
ENSG00000150867	5.88e-11	0.295053	0.164	0.122	1.19e-06	CD8+_T
ENSG00000006075.2	1.02e-10	-2.96382	0.251	0.315	2.07e-06	CD8+_T
ENSG00000165929.1	1.1e-10	0.305275	0.151	0.111	2.23e-06	CD8+_T
ENSG00000213658.2	1.14e-10	0.308477	0.305	0.261	2.3e-06	CD8+_T
ENSG00000151883.1	1.31e-10	0.311078	0.144	0.105	2.65e-06	CD8+_T
ENSG00000124256	2.08e-10	0.317738	0.207	0.161	4.2e-06	CD8+_T
ENSG00000002586.1	2.19e-10	0.319928	0.381	0.355	4.43e-06	CD8+_T
ENSG00000188811	2.4e-10	0.265061	0.168	0.125	4.86e-06	CD8+_T
ENSG00000125538.1	2.92e-10	-1.91345	0.105	0.157	5.9e-06	CD8+_T
ENSG00000166435	3.14e-10	0.269428	0.135	0.096	6.35e-06	CD8+_T
ENSG00000103479.1	3.16e-10	0.271985	0.137	0.098	6.39e-06	CD8+_T
ENSG00000076928	5.99e-10	0.311848	0.184	0.144	1.21e-05	CD8+_T
ENSG00000175463	6.76e-10	0.262148	0.108	0.073	1.37e-05	CD8+_T
ENSG00000174718	7.78e-10	0.313092	0.323	0.286	1.57e-05	CD8+_T
ENSG00000122188	1.19e-09	0.272136	0.108	0.074	2.4e-05	CD8+_T
[truncated: 4,285 more rows]

## Sheet: Table S2
Supplementary Table S2. ORA pathways enriched by DEGs from scRNAseq data (PBMCs).
ID	Description	GeneRatio	BgRatio	pvalue	p.adjust	qvalue	geneID	Count
R-HSA-72706	GTP hydrolysis and joining of the 60S ribosomal subunit	100/2093	112/10654	1.12256e-57	1.51209e-54	9.5477e-55	RPS11/RPL22L1/RPLP1/RPL18A/RPS5/RPS8/RPL34/RPL8/RPLP0/RPS15A/RPL36AL/RPSA/RPL15/RPS23/RPL30/RPL37A/RPL35A/RPL31/RPS3/EIF4E/RPL38/RPS25/EIF3L/EIF1AX/RPL7A/RPS7/RPS24/EIF2S2/RPL6/EIF5B/RPS2/EIF4A1/EIF3E/RPS27L/RPL32/RPS13/RPL13/RPL22/RPS18/RPS6/RPL9/RPS12/RPS3A/RPL11/RPL39/RPL3/RPL36/RPS16/RPL21/RPS29/RPLP2/RPL12/RPL19/RPL18/RPS14/RPL4/RPL10A/RPS4X/RPS9/RPS27A/RPS27/RPS28/RPL13A/RPL27/RPL7/RPS10/RP…	100
R-HSA-156827	L13a-mediated translational silencing of Ceruloplasmin expression	99/2093	111/10654	5.30104e-57	3.57025e-54	2.25434e-54	RPS11/RPL22L1/RPLP1/RPL18A/RPS5/PABPC1/RPS8/RPL34/RPL8/RPLP0/RPS15A/RPL36AL/RPSA/RPL15/RPS23/RPL30/RPL37A/RPL35A/RPL31/RPS3/EIF4E/RPL38/RPS25/EIF3L/EIF1AX/RPL7A/RPS7/RPS24/EIF2S2/RPL6/RPS2/EIF4A1/EIF3E/RPS27L/RPL32/RPS13/RPL13/RPL22/RPS18/RPS6/RPL9/RPS12/RPS3A/RPL11/RPL39/RPL3/RPL36/RPS16/RPL21/RPS29/RPLP2/RPL12/RPL19/RPL18/RPS14/RPL4/RPL10A/RPS4X/RPS9/RPS27A/RPS27/RPS28/RPL13A/RPL27/RPL7/RPS10/R…	99
R-HSA-72613	Eukaryotic Translation Initiation	102/2093	119/10654	5.25291e-55	1.76892e-52	1.11693e-52	RPS11/RPL22L1/RPLP1/RPL18A/RPS5/PABPC1/RPS8/RPL34/EIF4EBP1/RPL8/RPLP0/RPS15A/RPL36AL/RPSA/RPL15/RPS23/RPL30/RPL37A/RPL35A/RPL31/RPS3/EIF4E/RPL38/RPS25/EIF3L/EIF1AX/RPL7A/RPS7/RPS24/EIF2S2/RPL6/EIF5B/RPS2/EIF4A1/EIF3E/RPS27L/RPL32/RPS13/RPL13/RPL22/RPS18/RPS6/RPL9/RPS12/RPS3A/RPL11/RPL39/RPL3/RPL36/RPS16/RPL21/RPS29/RPLP2/RPL12/RPL19/RPL18/RPS14/RPL4/RPL10A/RPS4X/RPS9/RPS27A/RPS27/RPS28/RPL13A/RPL…	102
R-HSA-72737	Cap-dependent Translation Initiation	102/2093	119/10654	5.25291e-55	1.76892e-52	1.11693e-52	RPS11/RPL22L1/RPLP1/RPL18A/RPS5/PABPC1/RPS8/RPL34/EIF4EBP1/RPL8/RPLP0/RPS15A/RPL36AL/RPSA/RPL15/RPS23/RPL30/RPL37A/RPL35A/RPL31/RPS3/EIF4E/RPL38/RPS25/EIF3L/EIF1AX/RPL7A/RPS7/RPS24/EIF2S2/RPL6/EIF5B/RPS2/EIF4A1/EIF3E/RPS27L/RPL32/RPS13/RPL13/RPL22/RPS18/RPS6/RPL9/RPS12/RPS3A/RPL11/RPL39/RPL3/RPL36/RPS16/RPL21/RPS29/RPLP2/RPL12/RPL19/RPL18/RPS14/RPL4/RPL10A/RPS4X/RPS9/RPS27A/RPS27/RPS28/RPL13A/RPL…	102
R-HSA-1799339	SRP-dependent cotranslational protein targeting to membrane	98/2093	112/10654	1.12786e-54	3.03846e-52	1.91855e-52	RPS11/RPL22L1/RPLP1/RPL18A/RPS5/RPS8/RPL34/RPL8/SEC11C/RPLP0/RPS15A/RPL36AL/RPSA/RPL15/RPS23/RPL30/RPL37A/RPL35A/RPL31/RPS3/RPL38/RPS25/RPL7A/RPS7/RPS24/RPL6/SRP14/SEC61B/RPS2/SSR3/SSR2/RPS27L/RPL32/RPS13/RPL13/RPL22/RPS18/RPS6/RPL9/RPS12/RPS3A/RPL11/RPL39/RPL3/RPL36/RPS16/RPL21/RPS29/RPLP2/RPL12/RPL19/RPL18/RPS14/RPL4/RPL10A/RPS4X/RPS9/RPS27A/RPS27/RPS28/RPL13A/RPL27/RPL7/RPS10/RPL10/RPS15/RPL36…	98
R-HSA-6798695	Neutrophil degranulation	239/2093	480/10654	3.14228e-52	7.05442e-50	4.45432e-50	FABP5/CTSH/HVCN1/MNDA/PTPRC/LRMP/HSP90AB1/RAB31/GRN/SNAP23/CMTM6/PTPN6/PSMA2/PKM/PPIA/CYSTM1/DYNLL1/IMPDH2/GCA/NPC2/ANXA2/GMFG/PRDX4/PGAM1/DBNL/TUBB4B/GDI2/PSMB7/MIF/TYROBP/BST2/TUBB/LAMTOR1/PDAP1/BIN2/TRAPPC1/CPNE3/GSTP1/LTA4H/ARPC5/ALDOA/EEF2/SRP14/FCER1G/CD44/PSMB1/APRT/PLAC8/FTH1/TSPAN14/EEF1A1/B2M/HLA-B/SELL/CD63/CTSC/CYBB/TNFRSF1B/IQGAP1/PLAUR/HLA-C/NFKB1/LYZ/STOM/CTSD/CD68/LGALS3/PSAP/ITGB…	239
R-HSA-72689	Formation of a pool of free 40S subunits	90/2093	101/10654	8.36501e-52	1.44811e-49	9.1437e-50	RPS11/RPL22L1/RPLP1/RPL18A/RPS5/RPS8/RPL34/RPL8/RPLP0/RPS15A/RPL36AL/RPSA/RPL15/RPS23/RPL30/RPL37A/RPL35A/RPL31/RPS3/RPL38/RPS25/EIF3L/EIF1AX/RPL7A/RPS7/RPS24/RPL6/RPS2/EIF3E/RPS27L/RPL32/RPS13/RPL13/RPL22/RPS18/RPS6/RPL9/RPS12/RPS3A/RPL11/RPL39/RPL3/RPL36/RPS16/RPL21/RPS29/RPLP2/RPL12/RPL19/RPL18/RPS14/RPL4/RPL10A/RPS4X/RPS9/RPS27A/RPS27/RPS28/RPL13A/RPL27/RPL7/RPS10/RPL10/RPS15/RPL36A/RPS21/RPL…	90
R-HSA-156902	Peptide chain elongation	83/2093	89/10654	9.67557e-52	1.44811e-49	9.1437e-50	RPS11/RPL22L1/RPLP1/RPL18A/RPS5/RPS8/RPL34/RPL8/RPLP0/RPS15A/RPL36AL/RPSA/RPL15/RPS23/RPL30/RPL37A/RPL35A/RPL31/RPS3/RPL38/RPS25/RPL7A/RPS7/RPS24/RPL6/EEF2/RPS2/RPS27L/RPL32/RPS13/RPL13/RPL22/RPS18/RPS6/RPL9/RPS12/RPS3A/RPL11/RPL39/RPL3/RPL36/RPS16/RPL21/RPS29/RPLP2/RPL12/RPL19/RPL18/RPS14/RPL4/RPL10A/RPS4X/RPS9/RPS27A/RPS27/RPS28/RPL13A/RPL27/RPL7/RPS10/EEF1A1/RPL10/RPS15/RPL36A/RPS21/RPL37/RPL2…	83
R-HSA-192823	Viral mRNA Translation	83/2093	89/10654	9.67557e-52	1.44811e-49	9.1437e-50	RPS11/RPL22L1/RPLP1/RPL18A/RPS5/RPS8/RPL34/RPL8/RPLP0/RPS15A/RPL36AL/RPSA/RPL15/RPS23/RPL30/RPL37A/RPL35A/RPL31/RPS3/RPL38/RPS25/RPL7A/RPS7/RPS24/RPL6/RPS2/RPS27L/RPL32/RPS13/RPL13/RPL22/RPS18/RPS6/RPL9/RPS12/RPS3A/RPL11/RPL39/RPL3/RPL36/RPS16/RPL21/RPS29/RPLP2/RPL12/RPL19/RPL18/RPS14/RPL4/RPL10A/RPS4X/RPS9/RPS27A/RPS27/RPS28/RPL13A/RPL27/RPL7/RPS10/RPL10/RPS15/RPL36A/RPS21/RPL37/RPL29/RPL14/RPL3…	83
R-HSA-156842	Eukaryotic Translation Elongation	85/2093	93/10654	4.04493e-51	5.44852e-49	3.44032e-49	RPS11/RPL22L1/RPLP1/RPL18A/RPS5/RPS8/RPL34/RPL8/RPLP0/RPS15A/RPL36AL/RPSA/RPL15/RPS23/RPL30/RPL37A/RPL35A/RPL31/RPS3/RPL38/RPS25/RPL7A/RPS7/RPS24/EEF1B2/RPL6/EEF2/RPS2/RPS27L/RPL32/RPS13/RPL13/RPL22/RPS18/RPS6/RPL9/RPS12/RPS3A/RPL11/RPL39/RPL3/RPL36/RPS16/RPL21/RPS29/RPLP2/RPL12/RPL19/RPL18/RPS14/RPL4/RPL10A/RPS4X/RPS9/RPS27A/RPS27/RPS28/RPL13A/RPL27/RPL7/RPS10/EEF1A1/RPL10/RPS15/RPL36A/RPS21/RPL…	85
R-HSA-72764	Eukaryotic Translation Termination	83/2093	93/10654	5.84929e-48	7.16272e-46	4.5227e-46	RPS11/RPL22L1/RPLP1/RPL18A/RPS5/RPS8/RPL34/RPL8/RPLP0/RPS15A/RPL36AL/RPSA/RPL15/RPS23/RPL30/RPL37A/RPL35A/RPL31/RPS3/RPL38/RPS25/RPL7A/RPS7/RPS24/RPL6/TRMT112/RPS2/RPS27L/RPL32/RPS13/RPL13/RPL22/RPS18/RPS6/RPL9/RPS12/RPS3A/RPL11/RPL39/RPL3/RPL36/RPS16/RPL21/RPS29/RPLP2/RPL12/RPL19/RPL18/RPS14/RPL4/RPL10A/RPS4X/RPS9/RPS27A/RPS27/RPS28/RPL13A/RPL27/RPL7/RPS10/RPL10/RPS15/RPL36A/RPS21/RPL37/RPL29/RP…	83
R-HSA-975956	Nonsense Mediated Decay (NMD) independent of the Exon Junction Complex (EJC)	84/2093	95/10654	8.73388e-48	9.80378e-46	6.19033e-46	RPS11/RPL22L1/RPLP1/RPL18A/RPS5/PABPC1/RPS8/RPL34/RPL8/RPLP0/RPS15A/RPL36AL/RPSA/RPL15/RPS23/RPL30/RPL37A/RPL35A/RPL31/RPS3/RPL38/RPS25/RPL7A/RPS7/RPS24/RPL6/RPS2/RPS27L/RPL32/RPS13/RPL13/RPL22/RPS18/RPS6/RPL9/RPS12/RPS3A/RPL11/RPL39/RPL3/RPL36/RPS16/RPL21/RPS29/RPLP2/RPL12/RPL19/RPL18/RPS14/RPL4/RPL10A/RPS4X/RPS9/RPS27A/RPS27/RPS28/RPL13A/RPL27/RPL7/RPS10/RPL10/RPS15/RPL36A/RPS21/RPL37/RPL29/RPL…	84
R-HSA-9010553	Regulation of expression of SLITs and ROBOs	120/2093	171/10654	3.08278e-47	3.19424e-45	2.01691e-45	RPS11/RPL22L1/RPLP1/RPL18A/RPS5/PABPC1/RPS8/RPL34/RPL8/PSMA4/PSMA2/RPLP0/PSME2/RPS15A/RPL36AL/RPSA/RPL15/PSMB9/RPS23/RPL30/RPL37A/RPL35A/RPL31/PSMB2/RPS3/UPF2/RPL38/PSMA1/RPS25/RBX1/PSMB7/RPL7A/PSME1/RPS7/RPS24/PSMB6/RNPS1/PSMB8/RPL6/PSMB10/PSMA7/PSMB1/RPS2/RPS27L/RPL32/RPS13/RPL13/RPL22/RPS18/RPS6/RPL9/RPS12/RPS3A/RPL11/RPL39/RPL3/RPL36/RPS16/RPL21/RPS29/RPLP2/RPL12/RPL19/RPL18/RPS14/RPL4/RPL10A…	120
R-HSA-2408557	Selenocysteine synthesis	82/2093	93/10654	1.88284e-46	1.81156e-44	1.14386e-44	RPS11/RPL22L1/RPLP1/RPL18A/RPS5/RPS8/RPL34/RPL8/RPLP0/RPS15A/RPL36AL/RPSA/RPL15/RPS23/RPL30/RPL37A/RPL35A/RPL31/RPS3/RPL38/RPS25/RPL7A/RPS7/RPS24/RPL6/RPS2/RPS27L/RPL32/RPS13/RPL13/RPL22/RPS18/RPS6/RPL9/RPS12/RPS3A/RPL11/RPL39/RPL3/RPL36/RPS16/RPL21/RPS29/RPLP2/RPL12/RPL19/RPL18/RPS14/RPL4/RPL10A/RPS4X/RPS9/RPS27A/RPS27/RPS28/RPL13A/RPL27/RPL7/RPS10/RPL10/RPS15/RPL36A/RPS21/RPL37/RPL29/RPL14/RPL3…	82
R-HSA-5663205	Infectious disease	196/2093	383/10654	5.17295e-45	4.64531e-43	2.93315e-43	RPS11/RPL22L1/CD247/GRB2/RPLP1/SLC25A6/RPL18A/LCK/RAN/HSP90AB1/RPS5/TCEA1/RPS8/RPL34/RPL8/PSMA4/HMGA1/PSMA2/RPLP0/PSME2/FYN/PPIA/RPS15A/RPL36AL/RPSA/RPL15/PSMB9/RPS23/RPL30/RPL37A/RPL35A/RPL31/BANF1/PSMB2/RPS3/RPL38/PSMA1/RPS25/RBX1/PSMB7/CD8B/RPL7A/PSME1/GTF2A2/RPS7/SLC25A5/RPS24/PSMB6/CALM2/PSMB8/RPL6/PSMB10/EEF2/TAF7/PSMA7/PSMB1/RPS2/CALM1/RPS27L/RPL32/RPS13/RPL13/RPL22/RPS18/RPS6/RPL9/NPM1/RP…	196
R-HSA-72766	Translation	163/2093	291/10654	3.90611e-44	3.28846e-42	2.07641e-42	WARS1/RPS11/RPL22L1/MRPL12/MRPL4/MRPL44/RPLP1/RPL18A/RPS5/MRPL15/MRPL13/PABPC1/RPS8/RPL34/EIF4EBP1/RPL8/MRPL52/EEF1E1/SEC11C/RPLP0/MRPS23/MRPL40/RPS15A/RPL36AL/RPSA/RPL15/RPS23/RPL30/AURKAIP1/MRPL11/RPL37A/RPL35A/IARS1/RPL31/MRPS18A/CHCHD1/MRPL28/MRPS12/MRPS15/RPS3/MRPL54/EIF4E/RPL38/MRPL42/RPS25/MRPL51/EIF3L/MRPL18/EIF1AX/RPL7A/QARS1/MRPS36/TUFM/MRPL32/TARS1/RPS7/RPS24/EEF1B2/EIF2S2/MRPL14/RPL6/…	163
R-HSA-376176	Signaling by ROBO receptors	135/2093	218/10654	1.99743e-43	1.58267e-41	9.99334e-42	RPS11/RPL22L1/RPLP1/RPL18A/RPS5/PABPC1/RPS8/RPL34/RPL8/PSMA4/PSMA2/RPLP0/PSME2/RPS15A/RPL36AL/RPSA/RPL15/PSMB9/RPS23/RPL30/RPL37A/RPL35A/RPL31/VASP/PSMB2/RPS3/UPF2/RPL38/PSMA1/RPS25/RBX1/PSMB7/RPL7A/PSME1/RPS7/RPS24/PSMB6/RNPS1/PSMB8/RPL6/PSMB10/PSMA7/PSMB1/RPS2/EVL/RPS27L/RPL32/RPS13/RPL13/RPL22/RPS18/RPS6/RPL9/RPS12/RPS3A/RPL11/RPL39/RPL3/RPL36/RPS16/RPL21/RPS29/RPLP2/RPL12/RPL19/RPL18/RPS14/RP…	135
R-HSA-927802	Nonsense-Mediated Decay (NMD)	90/2093	115/10654	3.63556e-42	2.57742e-40	1.62744e-40	RPS11/RPL22L1/RPLP1/RPL18A/RPS5/PABPC1/RPS8/RPL34/RPL8/RPLP0/RPS15A/RPL36AL/RPSA/RPL15/RPS23/RPL30/RPL37A/RPL35A/RPL31/RPS3/UPF2/RPL38/RPS25/RPL7A/RPS7/RPS24/RNPS1/RPL6/RPS2/RPS27L/RPL32/RPS13/RPL13/RPL22/RPS18/RPS6/RPL9/RPS12/RPS3A/RPL11/RPL39/RPL3/RPL36/RPS16/RPL21/RPS29/RPLP2/RPL12/RPL19/RPL18/RPS14/RPL4/RPL10A/RPS4X/RPS9/RPS27A/RPS27/RPS28/RPL13A/RPL27/RPL7/RPS10/RPL10/RPS15/RPL36A/RPS21/RPL3…	90
R-HSA-975957	Nonsense Mediated Decay (NMD) enhanced by the Exon Junction Complex (EJC)	90/2093	115/10654	3.63556e-42	2.57742e-40	1.62744e-40	RPS11/RPL22L1/RPLP1/RPL18A/RPS5/PABPC1/RPS8/RPL34/RPL8/RPLP0/RPS15A/RPL36AL/RPSA/RPL15/RPS23/RPL30/RPL37A/RPL35A/RPL31/RPS3/UPF2/RPL38/RPS25/RPL7A/RPS7/RPS24/RNPS1/RPL6/RPS2/RPS27L/RPL32/RPS13/RPL13/RPL22/RPS18/RPS6/RPL9/RPS12/RPS3A/RPL11/RPL39/RPL3/RPL36/RPS16/RPL21/RPS29/RPLP2/RPL12/RPL19/RPL18/RPS14/RPL4/RPL10A/RPS4X/RPS9/RPS27A/RPS27/RPS28/RPL13A/RPL27/RPL7/RPS10/RPL10/RPS15/RPL36A/RPS21/RPL3…	90
R-HSA-449147	Signaling by Interleukins	216/2093	461/10654	1.02332e-41	6.89208e-40	4.35182e-40	MEF2C/BLNK/CD86/IL32/SYK/EBI3/ANXA1/IL7R/LYN/CXCL10/CCL22/GRB2/BCL2/LCK/RORA/PSMA4/PTPN6/PSMA2/RPLP0/PSME2/FYN/PPIA/UBE2N/PSMB9/STAT6/ANXA2/PSMB2/CAPZA1/YWHAZ/PSMA1/RBX1/PSMB7/MIF/HNRNPA2B1/PSME1/CFL1/PSMB6/LGALS9/PSMB8/PSMB10/PIK3R1/PSMA7/PSMB1/PIM1/STAT4/HNRNPDL/TIMP1/PDCD4/IFNG/RPS27A/HAVCR2/UBA52/LCP1/TNFRSF1B/HCK/UBB/FASLG/MAP3K8/NFKB1/ICAM1/NFKBIA/CDKN1A/IL2RB/TNF/CXCL2/MYC/P4HB/IL1RN/ITGB2…	216
R-HSA-168254	Influenza Infection	106/2093	155/10654	3.72406e-40	2.38872e-38	1.50829e-38	RPS11/RPL22L1/RPLP1/SLC25A6/RPL18A/RAN/RPS5/RPS8/RPL34/RPL8/RPLP0/RPS15A/RPL36AL/RPSA/RPL15/RPS23/RPL30/RPL37A/RPL35A/RPL31/RPS3/RPL38/RPS25/RPL7A/RPS7/RPS24/RPL6/RPS2/RPS27L/RPL32/RPS13/RPL13/RPL22/RPS18/RPS6/RPL9/RPS12/RPS3A/RPL11/RPL39/RPL3/RPL36/RPS16/RPL21/RPS29/RPLP2/RPL12/RPL19/RPL18/RPS14/RPL4/RPL10A/RPS4X/RPS9/RPS27A/RPS27/RPS28/RPL13A/RPL27/RPL7/RPS10/RPL10/RPS15/RPL36A/RPS21/RPL37/RPL2…	106
R-HSA-168255	Influenza Life Cycle	101/2093	144/10654	7.5652e-40	4.63197e-38	2.92473e-38	RPS11/RPL22L1/RPLP1/RPL18A/RAN/RPS5/RPS8/RPL34/RPL8/RPLP0/RPS15A/RPL36AL/RPSA/RPL15/RPS23/RPL30/RPL37A/RPL35A/RPL31/RPS3/RPL38/RPS25/RPL7A/RPS7/RPS24/RPL6/RPS2/RPS27L/RPL32/RPS13/RPL13/RPL22/RPS18/RPS6/RPL9/RPS12/RPS3A/RPL11/RPL39/RPL3/RPL36/RPS16/RPL21/RPS29/RPLP2/RPL12/RPL19/RPL18/RPS14/RPL4/RPL10A/RPS4X/RPS9/RPS27A/RPS27/RPS28/RPL13A/RPL27/RPL7/RPS10/RPL10/RPS15/RPL36A/RPS21/RPL37/RPL29/RPL14/…	101
R-HSA-2408522	Selenoamino acid metabolism	88/2093	118/10654	2.66721e-38	1.56206e-36	9.86319e-37	RPS11/RPL22L1/RPLP1/RPL18A/RPS5/RPS8/RPL34/RPL8/EEF1E1/RPLP0/RPS15A/RPL36AL/RPSA/RPL15/RPS23/RPL30/RPL37A/RPL35A/IARS1/RPL31/RPS3/RPL38/RPS25/RPL7A/QARS1/RPS7/RPS24/RPL6/RPS2/RPS27L/RPL32/RPS13/RPL13/RPL22/RPS18/RPS6/RPL9/RPS12/RPS3A/RPL11/RPL39/RPL3/RPL36/RPS16/RPL21/RPS29/RPLP2/RPL12/RPL19/RPL18/RPS14/RPL4/RPL10A/RPS4X/RPS9/RPS27A/RPS27/RPS28/RPL13A/RPL27/RPL7/RPS10/RPL10/RPS15/RPL36A/RPS21/RPL…	88
R-HSA-168273	Influenza Viral RNA Transcription and Replication	94/2093	134/10654	3.69307e-37	2.07273e-35	1.30877e-35	RPS11/RPL22L1/RPLP1/RPL18A/RPS5/RPS8/RPL34/RPL8/RPLP0/RPS15A/RPL36AL/RPSA/RPL15/RPS23/RPL30/RPL37A/RPL35A/RPL31/RPS3/RPL38/RPS25/RPL7A/RPS7/RPS24/RPL6/RPS2/RPS27L/RPL32/RPS13/RPL13/RPL22/RPS18/RPS6/RPL9/RPS12/RPS3A/RPL11/RPL39/RPL3/RPL36/RPS16/RPL21/RPS29/RPLP2/RPL12/RPL19/RPL18/RPS14/RPL4/RPL10A/RPS4X/RPS9/RPS27A/RPS27/RPS28/RPL13A/RPL27/RPL7/RPS10/RPL10/RPS15/RPL36A/RPS21/RPL37/RPL29/RPL14/RPL3…	94
R-HSA-72662	Activation of the mRNA upon binding of the cap-binding complex and eIFs, and subsequent binding to 43S	51/2093	59/10654	2.29053e-28	1.23414e-26	7.79263e-27	RPS11/RPS5/PABPC1/RPS8/EIF4EBP1/RPS15A/RPSA/RPS23/RPS3/EIF4E/RPS25/EIF3L/EIF1AX/RPS7/RPS24/EIF2S2/RPS2/EIF4A1/EIF3E/RPS27L/RPS13/RPS18/RPS6/RPS12/RPS3A/RPS16/RPS29/RPS14/RPS4X/RPS9/RPS27A/RPS27/RPS28/RPS10/RPS15/RPS21/RPS20/RPS19/RPS26/RPS4Y1/EIF3H/EIF3K/EIF4A2/EIF4B/EIF3M/EIF3G/EIF3F/EIF3D/EIF2S3/EIF4G1/EIF4H	51
R-HSA-72649	Translation initiation complex formation	50/2093	58/10654	1.02768e-27	5.12697e-26	3.23729e-26	RPS11/RPS5/PABPC1/RPS8/RPS15A/RPSA/RPS23/RPS3/EIF4E/RPS25/EIF3L/EIF1AX/RPS7/RPS24/EIF2S2/RPS2/EIF4A1/EIF3E/RPS27L/RPS13/RPS18/RPS6/RPS12/RPS3A/RPS16/RPS29/RPS14/RPS4X/RPS9/RPS27A/RPS27/RPS28/RPS10/RPS15/RPS21/RPS20/RPS19/RPS26/RPS4Y1/EIF3H/EIF3K/EIF4A2/EIF4B/EIF3M/EIF3G/EIF3F/EIF3D/EIF2S3/EIF4G1/EIF4H	50
R-HSA-72702	Ribosomal scanning and start codon recognition	50/2093	58/10654	1.02768e-27	5.12697e-26	3.23729e-26	RPS11/RPS5/RPS8/RPS15A/RPSA/RPS23/RPS3/EIF4E/RPS25/EIF3L/EIF1AX/RPS7/RPS24/EIF2S2/RPS2/EIF4A1/EIF3E/RPS27L/RPS13/RPS18/RPS6/RPS12/RPS3A/RPS16/RPS29/RPS14/RPS4X/RPS9/RPS27A/RPS27/RPS28/RPS10/RPS15/RPS21/RPS20/RPS19/RPS26/RPS4Y1/EIF3H/EIF3K/EIF4A2/EIF4B/EIF3M/EIF3G/EIF5/EIF3F/EIF3D/EIF2S3/EIF4G1/EIF4H	50
R-HSA-1236975	Antigen processing-Cross presentation	69/2093	99/10654	2.68205e-27	1.29026e-25	8.14698e-26	BTK/NCF4/SNAP23/PSMA4/PSMA2/PSME2/NCF1/PSMB9/PSMB2/PSMA1/PSMB7/PSME1/PSMB6/PSMB8/PSMB10/TAP1/PSMA7/PSMB1/SEC61B/RPS27A/B2M/HLA-B/HLA-A/UBA52/CYBB/UBB/HLA-C/SEC61G/PDIA3/CALR/VAMP8/CTSS/UBC/SEC61A1/CYBA/LY96/PSMA6/HLA-F/SEM1/TAPBP/PSMD8/CTSL/CD14/NCF2/CD36/FCGR1A/TLR2/TLR4/FCGR1B/ITGAV/VAMP3/TLR1/STX4/MYD88/HLA-E/PSMC4/PSMA5/LNPEP/PSMC1/TAP2/PSMB5/PSMD1/PSMD7/PSMB4/PSMA3/PSMD11/PSMD4/PSMD2/PSMD14	69
R-HSA-6791226	Major pathway of rRNA processing in the nucleolus and cytosol	97/2093	185/10654	1.18805e-23	5.51829e-22	3.48437e-22	RPS11/RPL22L1/RPLP1/RPL18A/RPS5/RPS8/RPL34/RPL8/IMP4/RPLP0/EBNA1BP2/RPS15A/RPL36AL/RPSA/RPL15/RPS23/RPL30/EMG1/WDR43/RPL37A/RPL35A/GNL3/RPL31/NOB1/RPS3/RPL38/NCL/RPS25/RPL7A/DDX21/RPS7/RPS24/SNU13/RPL6/RPS2/RPS27L/RPL32/RPS13/RPL13/RPL22/RPS18/RPS6/RPL9/RPS12/RPS3A/RPL11/RPL39/RPL3/RPL36/RPS16/RPL21/RPS29/RPLP2/RPL12/RPL19/RPL18/RPS14/RPL4/RPL10A/RPS4X/RPS9/RPS27A/RPS27/RPS28/RPL13A/RPL27/RPL7/RP…	97
R-HSA-8868773	rRNA processing in the nucleus and cytosol	100/2093	195/10654	2.2075e-23	9.91166e-22	6.25845e-22	RPS11/RPL22L1/RPLP1/RPL18A/RPS5/NHP2/RPS8/RPL34/RPL8/IMP4/RPLP0/EBNA1BP2/RPS15A/RPL36AL/RPSA/RPL15/RPS23/RPL30/EMG1/WDR43/RPL37A/RPL35A/GNL3/RPL31/NOP10/NOB1/RPS3/RPL38/NCL/RPS25/RPL7A/DDX21/RPS7/RPS24/SNU13/RPL6/TRMT112/RPS2/RPS27L/RPL32/RPS13/RPL13/RPL22/RPS18/RPS6/RPL9/RPS12/RPS3A/RPL11/RPL39/RPL3/RPL36/RPS16/RPL21/RPS29/RPLP2/RPL12/RPL19/RPL18/RPS14/RPL4/RPL10A/RPS4X/RPS9/RPS27A/RPS27/RPS28/R…	100
R-HSA-983705	Signaling by the B Cell Receptor (BCR)	70/2093	112/10654	2.3818e-23	1.03493e-21	6.5348e-22	CD79A/CD79B/BLNK/CD19/BTK/CD22/ORAI2/SYK/RASGRP3/REL/LYN/PRKCB/GRB2/PSMA4/PTPN6/PSMA2/PSME2/FYN/PPIA/PSMB9/DAPP1/PSMB2/PSMA1/PSMB7/PSME1/FKBP1A/PSMB6/CALM2/PSMB8/PSMB10/PIK3R1/PSMA7/PSMB1/RASGRP1/CALM1/RPS27A/PIK3AP1/UBA52/UBB/NFKB1/NFKBIA/UBC/PSMA6/SEM1/PSMD8/NFKBIE/AHCYL1/NRAS/VAV1/CUL1/ITPR2/RELA/SKP1/NFATC2/PSMC4/PSMA5/PSMC1/MALT1/PSMB5/SH3KBP1/PSMD1/KRAS/PSMD7/PSMB4/PSMA3/CALM3/PSMD11/PSMD4/…	70
R-HSA-1236974	ER-Phagosome pathway	58/2093	83/10654	3.10502e-23	1.30702e-21	8.25282e-22	BTK/SNAP23/PSMA4/PSMA2/PSME2/PSMB9/PSMB2/PSMA1/PSMB7/PSME1/PSMB6/PSMB8/PSMB10/TAP1/PSMA7/PSMB1/SEC61B/RPS27A/B2M/HLA-B/HLA-A/UBA52/UBB/HLA-C/SEC61G/PDIA3/CALR/VAMP8/UBC/SEC61A1/LY96/PSMA6/HLA-F/SEM1/TAPBP/PSMD8/CD14/CD36/TLR2/TLR4/VAMP3/TLR1/STX4/MYD88/HLA-E/PSMC4/PSMA5/PSMC1/TAP2/PSMB5/PSMD1/PSMD7/PSMB4/PSMA3/PSMD11/PSMD4/PSMD2/PSMD14	58
R-HSA-72695	Formation of the ternary complex, and subsequently, the 43S complex	43/2093	51/10654	3.43009e-23	1.4001e-21	8.84055e-22	RPS11/RPS5/RPS8/RPS15A/RPSA/RPS23/RPS3/RPS25/EIF3L/EIF1AX/RPS7/RPS24/EIF2S2/RPS2/EIF3E/RPS27L/RPS13/RPS18/RPS6/RPS12/RPS3A/RPS16/RPS29/RPS14/RPS4X/RPS9/RPS27A/RPS27/RPS28/RPS10/RPS15/RPS21/RPS20/RPS19/RPS26/RPS4Y1/EIF3H/EIF3K/EIF3M/EIF3G/EIF3F/EIF3D/EIF2S3	43
R-HSA-72312	rRNA processing	103/2093	205/10654	3.73848e-23	1.4811e-21	9.352e-22	RPS11/RPL22L1/RPLP1/RPL18A/RPS5/NHP2/RPS8/RPL34/RPL8/IMP4/HSD17B10/RPLP0/EBNA1BP2/RPS15A/RPL36AL/RPSA/RPL15/RPS23/RPL30/EMG1/WDR43/RPL37A/RPL35A/GNL3/RPL31/NOP10/NOB1/RPS3/RPL38/NCL/RPS25/RPL7A/DDX21/RPS7/RPS24/SNU13/RPL6/TRMT112/RPS2/RPS27L/RPL32/RPS13/RPL13/RPL22/RPS18/RPS6/RPL9/RPS12/RPS3A/RPL11/RPL39/RPL3/RPL36/RPS16/RPL21/RPS29/RPLP2/RPL12/RPL19/RPL18/RPS14/RPL4/RPL10A/RPS4X/RPS9/RPS27A/RPS2…	103
R-HSA-913531	Interferon Signaling	99/2093	199/10654	6.89585e-22	2.65392e-20	1.67574e-20	HLA-DRA/HLA-DPA1/HLA-DPB1/HLA-DRB1/HLA-DQB1/HLA-DQA1/HLA-DQA2/HLA-DRB5/IRF8/IFI30/PTPN1/PTPN6/UBE2N/ISG20/MT2A/UBE2L6/GBP4/EIF4E/EIF4G2/BST2/IFITM2/PSMB8/IRF7/CD44/IFI35/SAMHD1/EIF4A1/IFNG/GBP3/RPS27A/B2M/HLA-B/HLA-A/UBA52/UBB/HLA-C/ICAM1/IFITM3/EIF4A2/UBC/HLA-F/JAK1/PTPN2/SUMO1/GBP5/IRF1/OASL/GBP1/IRF9/XAF1/ISG15/IFIT3/GBP2/IFIT2/IRF3/PTAFR/SOCS3/FCGR1A/IFNGR2/FCGR1B/EGR1/FLNA/NUP58/IFNAR1/NUP62…	99
R-HSA-202403	TCR signaling	70/2093	119/10654	3.591e-21	1.34363e-19	8.48399e-20	HLA-DRA/HLA-DPA1/HLA-DPB1/HLA-DRB1/HLA-DQB1/HLA-DQA1/HLA-DQA2/HLA-DRB5/CD3D/FYB1/CD3E/PTPRC/CD247/LCK/LAT/CD3G/PSMA4/PSMA2/PSME2/UBE2N/TRAT1/PSMB9/VASP/PSMB2/PSMA1/PSMB7/ITK/PSME1/PSMB6/PSMB8/PSMB10/PIK3R1/PSMA7/GRAP2/PSMB1/LCP2/EVL/RPS27A/UBA52/UBB/NFKB1/NFKBIA/RIPK2/UBC/PSMA6/SEM1/PSMD8/PTPN22/UBE2D1/PIK3CB/PAK1/CUL1/PAK2/TAB2/PAG1/RELA/SKP1/PSMC4/PSMA5/PSMC1/MALT1/PSMB5/PSMD1/PSMD7/PSMB4/PSMA3…	70
R-HSA-2454202	Fc epsilon receptor (FCERI) signaling	75/2093	134/10654	8.62159e-21	3.13873e-19	1.98186e-19	BTK/LAT2/SYK/LYN/GRB2/LAT/PSMA4/PSMA2/PSME2/FYN/UBE2N/PSMB9/PSMB2/PSMA1/PSMB7/ITK/PSME1/PSMB6/CALM2/PSMB8/PSMB10/FCER1G/TXK/PIK3R1/PSMA7/GRAP2/PSMB1/RASGRP1/LCP2/CALM1/RPS27A/UBA52/UBB/NFKB1/NFKBIA/RAC1/UBC/PSMA6/SEM1/PSMD8/FOS/UBE2D1/GAB2/PIK3CB/JUN/AHCYL1/PAK1/NRAS/VAV1/CUL1/PAK2/ITPR2/MAP3K1/TAB2/RELA/SKP1/MAPK1/NFATC2/PSMC4/PSMA5/MAP2K7/PSMC1/MALT1/MAPK8/PSMB5/PSMD1/KRAS/PSMD7/PSMB4/PSMA3/CAL…	75
R-HSA-202424	Downstream TCR signaling	58/2093	98/10654	6.10205e-18	2.16302e-16	1.36578e-16	HLA-DRA/HLA-DPA1/HLA-DPB1/HLA-DRB1/HLA-DQB1/HLA-DQA1/HLA-DQA2/HLA-DRB5/CD3D/CD3E/CD247/LCK/CD3G/PSMA4/PSMA2/PSME2/UBE2N/TRAT1/PSMB9/PSMB2/PSMA1/PSMB7/PSME1/PSMB6/PSMB8/PSMB10/PIK3R1/PSMA7/PSMB1/RPS27A/UBA52/UBB/NFKB1/NFKBIA/RIPK2/UBC/PSMA6/SEM1/PSMD8/UBE2D1/PIK3CB/CUL1/TAB2/RELA/SKP1/PSMC4/PSMA5/PSMC1/MALT1/PSMB5/PSMD1/PSMD7/PSMB4/PSMA3/PSMD11/PSMD4/PSMD2/PSMD14	58
R-HSA-71291	Metabolism of amino acids and derivatives	143/2093	372/10654	9.82487e-18	3.39336e-16	2.14264e-16	RPS11/RPL22L1/OAZ1/RPLP1/RPL18A/RPS5/RPS8/RPL34/RPL8/EEF1E1/PSMA4/PSMA2/HSD17B10/RPLP0/PSME2/RPS15A/RPL36AL/RPSA/RPL15/PSMB9/RPS23/RPL30/RPL37A/RPL35A/IARS1/RPL31/PSMB2/SMS/RPS3/RPL38/PSMA1/RPS25/NDUFAB1/PSMB7/RPL7A/TSTD1/QARS1/PSME1/RPS7/RPS24/PSMB6/PSMB8/RPL6/PSMB10/PSMA7/PPM1K/PSMB1/RPS2/RPS27L/RPL32/RPS13/RPL13/RPL22/RPS18/RPS6/RPL9/RPS12/RPS3A/RPL11/RPL39/RPL3/RPL36/RPS16/RPL21/RPS29/RPLP2/R…	143
R-HSA-1168372	Downstream signaling events of B Cell Receptor (BCR)	51/2093	83/10654	6.569e-17	2.21211e-15	1.39678e-15	RASGRP3/REL/PRKCB/PSMA4/PSMA2/PSME2/PPIA/PSMB9/PSMB2/PSMA1/PSMB7/PSME1/FKBP1A/PSMB6/CALM2/PSMB8/PSMB10/PSMA7/PSMB1/RASGRP1/CALM1/RPS27A/UBA52/UBB/NFKB1/NFKBIA/UBC/PSMA6/SEM1/PSMD8/NFKBIE/NRAS/CUL1/RELA/SKP1/NFATC2/PSMC4/PSMA5/PSMC1/MALT1/PSMB5/PSMD1/KRAS/PSMD7/PSMB4/PSMA3/CALM3/PSMD11/PSMD4/PSMD2/PSMD14	51
R-HSA-446652	Interleukin-1 family signaling	71/2093	140/10654	1.26504e-16	4.15613e-15	2.62428e-15	PSMA4/PTPN6/PSMA2/PSME2/UBE2N/PSMB9/PSMB2/PSMA1/RBX1/PSMB7/PSME1/PSMB6/PSMB8/PSMB10/PSMA7/PSMB1/RPS27A/UBA52/UBB/MAP3K8/NFKB1/NFKBIA/IL1RN/RIPK2/UBC/IL1B/PSMA6/SEM1/PTPN2/PTPN7/HMGB1/PSMD8/NFKB2/STAT3/PTPN4/IL18BP/IL1A/IRAK3/PTPN12/IL18/S100A12/IRAK2/IL1R1/PELI1/IRAK1/APP/MAP2K1/TBK1/CUL1/SQSTM1/TNIP2/CASP1/PTPN18/TAB2/MYD88/RELA/SKP1/IL18RAP/PSMC4/PSMA5/PSMC1/MAPK8/PSMB5/PSMD1/PSMD7/PSMB4/PSMA3/…	71
R-HSA-8953897	Cellular responses to external stimuli	173/2093	493/10654	1.32099e-16	4.2366e-15	2.67508e-15	NCF4/TUBA1B/LAMTOR5/HSP90AB1/PRDX1/PSMA4/HMGA1/PSMA2/PSME2/NCF1/DYNLL1/PSMB9/ATP6V0E1/RPA3/TUBA1C/DNAJA1/MT2A/PRDX3/PSMB2/CDK4/TUBB4B/CAPZA1/PSMA1/RBX1/PSMB7/CYCS/YWHAE/HSBP1/ATP6V0D1/PSME1/LAMTOR1/PSMB6/GSTP1/ANAPC11/H2BC12/PSMB8/PSMB10/PSMA7/PSMB1/H3-3A/H2AZ1/ATM/TXN/RPS27A/EEF1A1/UBA52/H3-3B/CYBB/UBB/NFKB1/CDKN1A/ATOX1/HSPA5/P4HB/ATP6V0B/CXCL8/SOD1/NBN/ATP6V1F/SOD2/DNAJB1/UBC/ERO1A/HIF1A/CYBA/…	173
R-HSA-877300	Interferon gamma signaling	54/2093	92/10654	1.42189e-16	4.45417e-15	2.81246e-15	HLA-DRA/HLA-DPA1/HLA-DPB1/HLA-DRB1/HLA-DQB1/HLA-DQA1/HLA-DQA2/HLA-DRB5/IRF8/IFI30/PTPN1/PTPN6/MT2A/GBP4/IRF7/CD44/IFNG/GBP3/B2M/HLA-B/HLA-A/HLA-C/ICAM1/HLA-F/JAK1/PTPN2/SUMO1/GBP5/IRF1/OASL/GBP1/IRF9/GBP2/IRF3/PTAFR/SOCS3/FCGR1A/IFNGR2/FCGR1B/IFNGR1/JAK2/TRIM25/SP100/HLA-E/TRIM22/NCAM1/OAS3/OAS1/OAS2/IRF4/CIITA/TRIM26/PML/STAT1	54
R-HSA-9020702	Interleukin-1 signaling	58/2093	103/10654	1.53488e-16	4.69882e-15	2.96694e-15	PSMA4/PSMA2/PSME2/UBE2N/PSMB9/PSMB2/PSMA1/RBX1/PSMB7/PSME1/PSMB6/PSMB8/PSMB10/PSMA7/PSMB1/RPS27A/UBA52/UBB/MAP3K8/NFKB1/NFKBIA/IL1RN/RIPK2/UBC/IL1B/PSMA6/SEM1/HMGB1/PSMD8/NFKB2/IL1A/IRAK3/S100A12/IRAK2/IL1R1/PELI1/IRAK1/APP/MAP2K1/CUL1/SQSTM1/TNIP2/TAB2/MYD88/RELA/SKP1/PSMC4/PSMA5/PSMC1/PSMB5/PSMD1/PSMD7/PSMB4/PSMA3/PSMD11/PSMD4/PSMD2/PSMD14	58
R-HSA-5357801	Programmed Cell Death	83/2093	181/10654	7.43593e-16	2.22582e-14	1.40543e-14	PMAIP1/BCL2/PSMA4/PSMA2/PSME2/DYNLL1/PSMB9/PSMB2/DBNL/YWHAZ/PSMA1/PSMB7/CYCS/YWHAE/APPL1/PSME1/BID/PSMB6/PSMB8/PSMB10/PSMA7/PSMB1/GZMB/SATB1/RPS27A/UBA52/UBB/FASLG/CFLAR/UBC/LY96/PSMA6/YWHAQ/VIM/SEM1/HMGB1/PSMD8/BAX/STAT3/TNFSF10/BIRC3/CD14/GSN/LMNA/TLR4/H1-0/TJP2/PLEC/CTNNB1/YWHAG/STK26/BIRC2/PAK2/BCAP31/XIAP/CASP8/HMGB2/MAPK1/PSMC4/PSMA5/PSMC1/DAPK1/BMF/LMNB1/BCL2L11/BCL2L1/MAPK8/CASP7/PSMB5/AD…	83
R-HSA-109581	Apoptosis	82/2093	178/10654	7.99979e-16	2.34255e-14	1.47914e-14	PMAIP1/BCL2/PSMA4/PSMA2/PSME2/DYNLL1/PSMB9/PSMB2/DBNL/YWHAZ/PSMA1/PSMB7/CYCS/YWHAE/APPL1/PSME1/BID/PSMB6/PSMB8/PSMB10/PSMA7/PSMB1/GZMB/SATB1/RPS27A/UBA52/UBB/FASLG/CFLAR/UBC/LY96/PSMA6/YWHAQ/VIM/SEM1/HMGB1/PSMD8/BAX/STAT3/TNFSF10/CD14/GSN/LMNA/TLR4/H1-0/TJP2/PLEC/CTNNB1/YWHAG/STK26/BIRC2/PAK2/BCAP31/XIAP/CASP8/HMGB2/MAPK1/PSMC4/PSMA5/PSMC1/DAPK1/BMF/LMNB1/BCL2L11/BCL2L1/MAPK8/CASP7/PSMB5/ADD1/CAS…	82
R-HSA-2262752	Cellular responses to stress	165/2093	479/10654	4.84964e-15	1.38989e-13	8.77605e-14	NCF4/TUBA1B/LAMTOR5/HSP90AB1/PRDX1/PSMA4/HMGA1/PSMA2/PSME2/NCF1/DYNLL1/PSMB9/ATP6V0E1/RPA3/TUBA1C/DNAJA1/PRDX3/PSMB2/CDK4/TUBB4B/CAPZA1/PSMA1/RBX1/PSMB7/CYCS/YWHAE/HSBP1/ATP6V0D1/PSME1/LAMTOR1/PSMB6/GSTP1/ANAPC11/H2BC12/PSMB8/PSMB10/PSMA7/PSMB1/H3-3A/H2AZ1/ATM/TXN/RPS27A/EEF1A1/UBA52/H3-3B/CYBB/UBB/NFKB1/CDKN1A/ATOX1/HSPA5/P4HB/ATP6V0B/CXCL8/SOD1/NBN/ATP6V1F/SOD2/DNAJB1/UBC/ERO1A/HIF1A/CYBA/DNAJB…	165
R-HSA-5607764	CLEC7A (Dectin-1) signaling	55/2093	101/10654	6.71201e-15	1.88356e-13	1.18932e-13	SYK/PSMA4/PSMA2/PSME2/UBE2N/PSMB9/PSMB2/PSMA1/PSMB7/PSME1/PSMB6/CALM2/PSMB8/PSMB10/PSMA7/PSMB1/CALM1/RPS27A/UBA52/UBB/NFKB1/NFKBIA/UBC/IL1B/PSMA6/SEM1/PSMD8/NFKB2/PYCARD/CLEC7A/SRC/UBE2D1/AHCYL1/CUL1/RELB/ITPR2/TAB2/RELA/SKP1/CASP8/NFATC2/PSMC4/PSMA5/PSMC1/MALT1/PSMB5/PSMD1/PSMD7/PSMB4/PSMA3/CALM3/PSMD11/PSMD4/PSMD2/PSMD14	55
R-HSA-909733	Interferon alpha/beta signaling	43/2093	69/10654	8.77672e-15	2.4127e-13	1.52343e-13	IRF8/PTPN1/PTPN6/ISG20/BST2/IFITM2/PSMB8/IRF7/IFI35/SAMHD1/HLA-B/HLA-A/HLA-C/IFITM3/HLA-F/JAK1/IRF1/OASL/IRF9/XAF1/ISG15/IFIT3/GBP2/IFIT2/IRF3/SOCS3/EGR1/IFNAR1/IFITM1/IFI27/HLA-E/MX1/IFIT1/RSAD2/MX2/USP18/OAS3/ADAR/IFI6/OAS1/OAS2/IRF4/STAT1	43
R-HSA-450531	Regulation of mRNA stability by proteins that bind AU-rich elements	50/2093	88/10654	1.17234e-14	3.1583e-13	1.99422e-13	ZFP36L1/PABPC1/PSMA4/PSMA2/PSME2/PSMB9/SET/PSMB2/YWHAZ/PSMA1/PSMB7/PSME1/PSMB6/PSMB8/PSMB10/PSMA7/PSMB1/RPS27A/UBA52/UBB/UBC/PSMA6/SEM1/PSMD8/MAPKAPK2/NUP214/HSPA8/ZFP36/HNRNPD/DCP2/EXOSC8/XRN1/PSMC4/ANP32A/PSMA5/PSMC1/TNPO1/PSMB5/EIF4G1/PSMD1/PSMD7/PSMB4/PSMA3/HSPA1A/PSMD11/PSMD4/PSMD2/XPO1/PSMD14/YWHAB	50
R-HSA-447115	Interleukin-12 family signaling	38/2093	57/10654	1.27763e-14	3.37444e-13	2.1307e-13	EBI3/RPLP0/PSME2/PPIA/ANXA2/CAPZA1/MIF/HNRNPA2B1/CFL1/STAT4/HNRNPDL/PDCD4/IFNG/LCP1/P4HB/SOD1/SOD2/RAP1B/MSN/ARF1/CANX/JAK1/CDC42/TALDO1/GSTO1/STAT3/RALA/IL27/IL10/PITPNA/JAK2/IL6ST/PAK2/IL23A/HSPA9/LMNB1/CNN2/STAT1	38
R-HSA-5621481	C-type lectin receptors (CLRs)	68/2093	142/10654	2.24139e-14	5.80605e-13	3.66607e-13	SYK/LYN/PSMA4/PSMA2/PSME2/FYN/UBE2N/PSMB9/PSMB2/PSMA1/PSMB7/PSME1/PSMB6/CALM2/PSMB8/PSMB10/FCER1G/PSMA7/PSMB1/CALM1/RPS27A/UBA52/UBB/NFKB1/NFKBIA/UBC/IL1B/PSMA6/SEM1/PSMD8/NFKB2/PYCARD/CLEC4E/CLEC7A/CLEC4D/SRC/CLEC4A/UBE2D1/AHCYL1/PAK1/NRAS/CUL1/PAK2/RELB/ITPR2/TAB2/RELA/ICAM3/ICAM2/SKP1/CASP8/PRKACB/NFATC2/PSMC4/PSMA5/PSMC1/MALT1/PSMB5/PSMD1/KRAS/PSMD7/PSMB4/PSMA3/CALM3/PSMD11/PSMD4/PSMD2/PSMD14	68
R-HSA-168898	Toll-like Receptor Cascades	72/2093	155/10654	2.77051e-14	7.04127e-13	4.44602e-13	MEF2C/LY86/BTK/TLR10/UBE2N/TANK/IRF7/RPS27A/UBA52/UBB/MAP3K8/NFKB1/NFKBIA/ITGB2/RIPK2/CTSS/UBC/LY96/HSP90B1/CTSB/HMGB1/NFKB2/PTPN4/BIRC3/IRF3/S100A9/S100A8/CTSL/CD14/DUSP6/IRAK3/CD36/TLR2/TLR8/TLR4/S100A12/FOS/MAP2K3/IRAK2/UBE2D1/DUSP3/PPP2CB/PELI1/IRAK1/JUN/APP/MAP2K1/TBK1/MAPKAPK2/CUL1/BIRC2/PPP2CA/RPS6KA1/TLR1/MAPKAPK3/TNIP2/MEF2A/MAP3K1/TAB2/MYD88/RELA/RPS6KA3/CNPY3/SKP1/CASP8/DUSP4/MAPK1/UBE…	72
R-HSA-450408	AUF1 (hnRNP D0) binds and destabilizes mRNA	37/2093	56/10654	4.40579e-14	1.07902e-12	6.81316e-13	PABPC1/PSMA4/PSMA2/PSME2/PSMB9/PSMB2/PSMA1/PSMB7/PSME1/PSMB6/PSMB8/PSMB10/PSMA7/PSMB1/RPS27A/UBA52/UBB/UBC/PSMA6/SEM1/PSMD8/HSPA8/HNRNPD/PSMC4/PSMA5/PSMC1/PSMB5/EIF4G1/PSMD1/PSMD7/PSMB4/PSMA3/HSPA1A/PSMD11/PSMD4/PSMD2/PSMD14	37
R-HSA-5362768	Hh mutants that don't undergo autocatalytic processing are degraded by ERAD	37/2093	56/10654	4.40579e-14	1.07902e-12	6.81316e-13	PSMA4/PSMA2/PSME2/PSMB9/PSMB2/PSMA1/PSMB7/PSME1/PSMB6/PSMB8/PSMB10/PSMA7/PSMB1/RPS27A/UBA52/UBB/UBC/PSMA6/SEM1/OS9/ERLEC1/DERL2/PSMD8/SEL1L/VCP/PSMC4/PSMA5/PSMC1/PSMB5/PSMD1/PSMD7/PSMB4/PSMA3/PSMD11/PSMD4/PSMD2/PSMD14	37
R-HSA-5678895	Defective CFTR causes cystic fibrosis	39/2093	61/10654	4.58843e-14	1.10368e-12	6.96889e-13	PSMA4/PSMA2/PSME2/PSMB9/PSMB2/PSMA1/PSMB7/PSME1/PSMB6/PSMB8/PSMB10/PSMA7/PSMB1/RPS27A/UBA52/UBB/UBC/PSMA6/SEM1/OS9/ERLEC1/DERL2/PSMD8/SEL1L/VCP/RNF5/DERL1/PSMC4/PSMA5/PSMC1/PSMB5/PSMD1/PSMD7/PSMB4/PSMA3/PSMD11/PSMD4/PSMD2/PSMD14	39
R-HSA-180585	Vif-mediated degradation of APOBEC3G	36/2093	54/10654	6.40595e-14	1.48773e-12	9.39384e-13	PSMA4/PSMA2/PSME2/PSMB9/PSMB2/PSMA1/RBX1/PSMB7/PSME1/PSMB6/PSMB8/PSMB10/PSMA7/PSMB1/RPS27A/APOBEC3G/UBA52/UBB/UBC/PSMA6/SEM1/ELOB/PSMD8/ELOC/PSMC4/PSMA5/PSMC1/PSMB5/PSMD1/PSMD7/PSMB4/PSMA3/PSMD11/PSMD4/PSMD2/PSMD14	36
R-HSA-9604323	Negative regulation of NOTCH4 signaling	36/2093	54/10654	6.40595e-14	1.48773e-12	9.39384e-13	PSMA4/PSMA2/PSME2/PSMB9/PSMB2/YWHAZ/PSMA1/RBX1/PSMB7/PSME1/PSMB6/PSMB8/PSMB10/PSMA7/PSMB1/RPS27A/UBA52/UBB/UBC/PSMA6/SEM1/PSMD8/CUL1/SKP1/PSMC4/PSMA5/PSMC1/PSMB5/PSMD1/PSMD7/PSMB4/PSMA3/PSMD11/PSMD4/PSMD2/PSMD14	36
R-HSA-1169091	Activation of NF-kappaB in B cells	41/2093	67/10654	9.06711e-14	2.07007e-12	1.30709e-12	REL/PRKCB/PSMA4/PSMA2/PSME2/PSMB9/PSMB2/PSMA1/PSMB7/PSME1/PSMB6/PSMB8/PSMB10/PSMA7/PSMB1/RPS27A/UBA52/UBB/NFKB1/NFKBIA/UBC/PSMA6/SEM1/PSMD8/NFKBIE/CUL1/RELA/SKP1/PSMC4/PSMA5/PSMC1/MALT1/PSMB5/PSMD1/PSMD7/PSMB4/PSMA3/PSMD11/PSMD4/PSMD2/PSMD14	41
R-HSA-5687128	MAPK6/MAPK4 signaling	49/2093	89/10654	1.1428e-13	2.56559e-12	1.61997e-12	PSMA4/PSMA2/PSME2/PSMB9/NCOA3/PSMB2/PSMA1/PSMB7/PSME1/PSMB6/CCND3/PSMB8/PSMB10/PSMA7/PSMB1/RPS27A/UBA52/UBB/SEPTIN7/MYC/RAC1/DNAJB1/UBC/PSMA6/CDC42/SEM1/PSMD8/CDC42EP2/MAPK6/JUN/PAK1/FOXO3/PAK2/CDC42EP3/TNRC6B/PRKACB/PSMC4/PSMA5/PSMC1/PSMB5/PSMD1/PSMD7/PSMB4/PSMA3/PSMD11/PSMD4/PSMD2/XPO1/PSMD14	49
R-HSA-8878159	Transcriptional regulation by RUNX3	51/2093	96/10654	2.39194e-13	5.28187e-12	3.33509e-12	PSMA4/PSMA2/PSME2/PSMB9/TCF7/PSMB2/PSMA1/PSMB7/PSME1/LEF1/PSMB6/PSMB8/PSMB10/PSMA7/PSMB1/RPS27A/UBA52/UBB/RUNX3/CDKN1A/MYC/UBC/PSMA6/BRD2/SEM1/ITGAL/PSMD8/RBPJ/ITGA4/SPP1/SRC/ZFHX3/RUNX1/TCF7L2/CTNNB1/FOXO3/MAML2/PSMC4/PSMA5/PSMC1/BCL2L11/PSMB5/PSMD1/KRAS/PSMD7/PSMB4/PSMA3/PSMD11/PSMD4/PSMD2/PSMD14	51
R-HSA-162909	Host Interactions of HIV factors	62/2093	129/10654	2.56852e-13	5.41926e-12	3.42184e-12	CD247/SLC25A6/LCK/RAN/PSMA4/HMGA1/PSMA2/PSME2/FYN/PPIA/PSMB9/BANF1/PSMB2/PSMA1/RBX1/PSMB7/CD8B/PSME1/SLC25A5/PSMB6/PSMB8/PSMB10/PSMA7/PSMB1/NPM1/RPS27A/B2M/APOBEC3G/UBA52/HCK/UBB/RAC1/UBC/ARF1/AP2S1/PSMA6/SEM1/ELOB/PSMD8/AP1S2/NUP58/NUP62/PAK2/NUP214/ELOC/SKP1/TPR/PSMC4/PSMA5/PSMC1/NUP98/PSMB5/PSMD1/PSMD7/AP2M1/PSMB4/PSMA3/PSMD11/PSMD4/PSMD2/XPO1/PSMD14	62
R-HSA-166016	Toll Like Receptor 4 (TLR4) Cascade	62/2093	129/10654	2.56852e-13	5.41926e-12	3.42184e-12	MEF2C/LY86/BTK/UBE2N/TANK/IRF7/RPS27A/UBA52/UBB/MAP3K8/NFKB1/NFKBIA/ITGB2/RIPK2/UBC/LY96/HMGB1/NFKB2/PTPN4/BIRC3/IRF3/CD14/DUSP6/IRAK3/CD36/TLR2/TLR4/S100A12/FOS/MAP2K3/IRAK2/UBE2D1/DUSP3/PPP2CB/PELI1/IRAK1/JUN/APP/MAP2K1/TBK1/MAPKAPK2/CUL1/BIRC2/PPP2CA/RPS6KA1/TLR1/MAPKAPK3/TNIP2/MEF2A/MAP3K1/TAB2/MYD88/RELA/RPS6KA3/SKP1/CASP8/DUSP4/MAPK1/UBE2D3/MAP2K7/MAPK8/TRAF3	62
R-HSA-195253	Degradation of beta-catenin by the destruction complex	46/2093	82/10654	2.57485e-13	5.41926e-12	3.42184e-12	PSMA4/PSMA2/PSME2/PSMB9/TCF7/PSMB2/PSMA1/RBX1/PSMB7/PSME1/PPP2R5C/LEF1/PSMB6/PSMB8/PSMB10/PSMA7/PSMB1/TLE5/RPS27A/UBA52/UBB/UBC/PSMA6/SEM1/PSMD8/PPP2CB/TCF7L2/CTNNB1/CUL1/PPP2CA/SKP1/TLE4/PSMC4/PSMA5/PSMC1/PSMB5/TLE3/PSMD1/PSMD7/PSMB4/CSNK1A1/PSMA3/PSMD11/PSMD4/PSMD2/PSMD14	46
R-HSA-5387390	Hh mutants abrogate ligand secretion	37/2093	59/10654	4.97538e-13	1.03105e-11	6.51029e-12	PSMA4/PSMA2/PSME2/PSMB9/PSMB2/PSMA1/PSMB7/PSME1/PSMB6/PSMB8/PSMB10/PSMA7/PSMB1/RPS27A/UBA52/UBB/UBC/PSMA6/SEM1/OS9/ERLEC1/DERL2/PSMD8/SEL1L/VCP/PSMC4/PSMA5/PSMC1/PSMB5/PSMD1/PSMD7/PSMB4/PSMA3/PSMD11/PSMD4/PSMD2/PSMD14	37
R-HSA-8854050	FBXL7 down-regulates AURKA during mitotic entry and in early mitosis	35/2093	54/10654	5.09508e-13	1.03986e-11	6.56591e-12	PSMA4/PSMA2/PSME2/PSMB9/PSMB2/PSMA1/RBX1/PSMB7/PSME1/PSMB6/PSMB8/PSMB10/PSMA7/PSMB1/RPS27A/UBA52/UBB/UBC/PSMA6/SEM1/PSMD8/CUL1/SKP1/PSMC4/PSMA5/PSMC1/PSMB5/PSMD1/PSMD7/PSMB4/PSMA3/PSMD11/PSMD4/PSMD2/PSMD14	35
R-HSA-8950505	Gene and protein expression by JAK-STAT signaling after Interleukin-12 stimulation	28/2093	38/10654	8.33386e-13	1.67548e-11	1.05793e-11	RPLP0/PSME2/PPIA/ANXA2/CAPZA1/MIF/HNRNPA2B1/CFL1/STAT4/HNRNPDL/PDCD4/IFNG/LCP1/SOD1/SOD2/RAP1B/MSN/ARF1/CDC42/TALDO1/GSTO1/RALA/IL10/PITPNA/PAK2/HSPA9/LMNB1/CNN2	28
R-HSA-5358346	Hedgehog ligand biogenesis	39/2093	65/10654	9.0189e-13	1.78654e-11	1.12806e-11	PSMA4/PSMA2/PSME2/PSMB9/PSMB2/PSMA1/PSMB7/PSME1/PSMB6/PSMB8/PSMB10/PSMA7/PSMB1/RPS27A/UBA52/UBB/P4HB/UBC/ADAM17/PSMA6/SEM1/OS9/ERLEC1/DERL2/PSMD8/SEL1L/VCP/PSMC4/PSMA5/PSMC1/PSMB5/PSMD1/PSMD7/PSMB4/PSMA3/PSMD11/PSMD4/PSMD2/PSMD14	39
R-HSA-187577	SCF(Skp2)-mediated degradation of p27/p21	37/2093	60/10654	1.05369e-12	1.94427e-11	1.22766e-11	CKS1B/PSMA4/PSMA2/PSME2/PSMB9/PSMB2/CDK4/PSMA1/PSMB7/PSME1/PSMB6/PSMB8/PSMB10/PSMA7/PSMB1/RPS27A/UBA52/UBB/CDKN1A/UBC/PSMA6/SEM1/PSMD8/CUL1/SKP1/PSMC4/PSMA5/PSMC1/PSMB5/PSMD1/PSMD7/PSMB4/PSMA3/PSMD11/PSMD4/PSMD2/PSMD14	37
R-HSA-5607761	Dectin-1 mediated noncanonical NF-kB signaling	37/2093	60/10654	1.05369e-12	1.94427e-11	1.22766e-11	PSMA4/PSMA2/PSME2/PSMB9/PSMB2/PSMA1/PSMB7/PSME1/PSMB6/PSMB8/PSMB10/PSMA7/PSMB1/RPS27A/UBA52/UBB/UBC/PSMA6/SEM1/PSMD8/NFKB2/CUL1/RELB/RELA/SKP1/PSMC4/PSMA5/PSMC1/PSMB5/PSMD1/PSMD7/PSMB4/PSMA3/PSMD11/PSMD4/PSMD2/PSMD14	37
R-HSA-5610780	Degradation of GLI1 by the proteasome	37/2093	60/10654	1.05369e-12	1.94427e-11	1.22766e-11	PSMA4/PSMA2/PSME2/PSMB9/PSMB2/PSMA1/RBX1/PSMB7/PSME1/PSMB6/PSMB8/PSMB10/PSMA7/PSMB1/RPS27A/UBA52/UBB/UBC/PSMA6/NUMB/SEM1/PSMD8/CUL1/SKP1/PRKACB/PSMC4/PSMA5/PSMC1/PSMB5/PSMD1/PSMD7/PSMB4/PSMA3/PSMD11/PSMD4/PSMD2/PSMD14	37
R-HSA-5610783	Degradation of GLI2 by the proteasome	37/2093	60/10654	1.05369e-12	1.94427e-11	1.22766e-11	PSMA4/PSMA2/PSME2/PSMB9/PSMB2/PSMA1/RBX1/PSMB7/PSME1/PSMB6/PSMB8/PSMB10/PSMA7/PSMB1/RPS27A/UBA52/UBB/UBC/PSMA6/SEM1/PSMD8/CUL1/SKP1/PRKACB/PSMC4/PSMA5/PSMC1/PSMB5/PSMD1/PSMD7/PSMB4/CSNK1A1/PSMA3/PSMD11/PSMD4/PSMD2/PSMD14	37
R-HSA-5610785	GLI3 is processed to GLI3R by the proteasome	37/2093	60/10654	1.05369e-12	1.94427e-11	1.22766e-11	PSMA4/PSMA2/PSME2/PSMB9/PSMB2/PSMA1/RBX1/PSMB7/PSME1/PSMB6/PSMB8/PSMB10/PSMA7/PSMB1/RPS27A/UBA52/UBB/UBC/PSMA6/SEM1/PSMD8/CUL1/SKP1/PRKACB/PSMC4/PSMA5/PSMC1/PSMB5/PSMD1/PSMD7/PSMB4/CSNK1A1/PSMA3/PSMD11/PSMD4/PSMD2/PSMD14	37
R-HSA-211733	Regulation of activated PAK-2p34 by proteasome mediated degradation	33/2093	50/10654	1.1068e-12	2.01467e-11	1.27211e-11	PSMA4/PSMA2/PSME2/PSMB9/PSMB2/PSMA1/PSMB7/PSME1/PSMB6/PSMB8/PSMB10/PSMA7/PSMB1/RPS27A/UBA52/UBB/UBC/PSMA6/SEM1/PSMD8/PAK2/PSMC4/PSMA5/PSMC1/PSMB5/PSMD1/PSMD7/PSMB4/PSMA3/PSMD11/PSMD4/PSMD2/PSMD14	33
R-HSA-166166	MyD88-independent TLR4 cascade	51/2093	99/10654	1.1581e-12	2.05258e-11	1.29605e-11	MEF2C/UBE2N/TANK/IRF7/RPS27A/UBA52/UBB/MAP3K8/NFKB1/NFKBIA/RIPK2/UBC/LY96/HMGB1/NFKB2/BIRC3/IRF3/CD14/DUSP6/TLR4/S100A12/FOS/MAP2K3/IRAK2/UBE2D1/DUSP3/PPP2CB/IRAK1/JUN/APP/MAP2K1/TBK1/MAPKAPK2/CUL1/BIRC2/PPP2CA/RPS6KA1/MAPKAPK3/TNIP2/MEF2A/TAB2/RELA/RPS6KA3/SKP1/CASP8/DUSP4/MAPK1/UBE2D3/MAP2K7/MAPK8/TRAF3	51
R-HSA-937061	TRIF(TICAM1)-mediated TLR4 signaling	51/2093	99/10654	1.1581e-12	2.05258e-11	1.29605e-11	MEF2C/UBE2N/TANK/IRF7/RPS27A/UBA52/UBB/MAP3K8/NFKB1/NFKBIA/RIPK2/UBC/LY96/HMGB1/NFKB2/BIRC3/IRF3/CD14/DUSP6/TLR4/S100A12/FOS/MAP2K3/IRAK2/UBE2D1/DUSP3/PPP2CB/IRAK1/JUN/APP/MAP2K1/TBK1/MAPKAPK2/CUL1/BIRC2/PPP2CA/RPS6KA1/MAPKAPK3/TNIP2/MEF2A/TAB2/RELA/RPS6KA3/SKP1/CASP8/DUSP4/MAPK1/UBE2D3/MAP2K7/MAPK8/TRAF3	51
R-HSA-5668541	TNFR2 non-canonical NF-kB pathway	52/2093	102/10654	1.18598e-12	2.07469e-11	1.31001e-11	TNFRSF13B/CD40/CD70/PSMA4/PSMA2/PSME2/PSMB9/PSMB2/PSMA1/PSMB7/PSME1/PSMB6/PSMB8/PSMB10/PSMA7/PSMB1/RPS27A/UBA52/TNFRSF1B/LTB/UBB/FASLG/TNF/CD27/UBC/PSMA6/SEM1/PSMD8/NFKB2/TNFRSF4/TNFSF13B/BIRC3/CUL1/BIRC2/RELB/SKP1/TNFRSF18/TNFRSF9/TNFSF14/PSMC4/PSMA5/PSMC1/PSMB5/PSMD1/PSMD7/TRAF3/PSMB4/PSMA3/PSMD11/PSMD4/PSMD2/PSMD14	52
R-HSA-6785807	Interleukin-4 and Interleukin-13 signaling	54/2093	108/10654	1.20532e-12	2.0815e-11	1.3143e-11	ANXA1/CCL22/BCL2/RORA/STAT6/PIK3R1/PIM1/TIMP1/TNFRSF1B/FASLG/ICAM1/CDKN1A/TNF/MYC/ITGB2/CXCL8/MCL1/HIF1A/ZEB1/IL1B/HSP90B1/IL2RG/JAK1/VIM/BATF/STAT3/IL4R/PTGS2/IL6/CCL2/IL10/SOCS3/IL1A/CD36/VEGFA/MMP9/ITGAX/IL18/RHOU/FOS/IL13RA1/HMOX1/JUNB/JAK2/FOXO3/BCL6/IL6R/IL23A/HSPA8/FSCN1/IRF4/BCL2L1/HSP90AA1/STAT1	54
R-HSA-1234176	Oxygen-dependent proline hydroxylation of Hypoxia-inducible Factor Alpha	39/2093	66/10654	1.78953e-12	3.05126e-11	1.92663e-11	PSMA4/PSMA2/PSME2/PSMB9/PSMB2/PSMA1/RBX1/PSMB7/PSME1/PSMB6/PSMB8/PSMB10/PSMA7/PSMB1/RPS27A/UBA52/UBB/UBC/HIF1A/PSMA6/SEM1/ELOB/PSMD8/UBE2D1/ELOC/PSMC4/PSMA5/UBE2D3/PSMC1/EGLN3/PSMB5/PSMD1/PSMD7/PSMB4/PSMA3/PSMD11/PSMD4/PSMD2/PSMD14	39
R-HSA-2029480	Fcgamma receptor (FCGR) dependent phagocytosis	46/2093	86/10654	2.59323e-12	4.36635e-11	2.75701e-11	BTK/SYK/LYN/CD247/GRB2/HSP90AB1/CD3G/ACTB/FYN/ACTG1/ARPC3/ARPC4/CFL1/ARPC1B/ARPC5/PIK3R1/ARPC2/BRK1/FCGR3A/HCK/RAC1/ACTR2/ABI1/CDC42/MYH9/ACTR3/WIPF1/FCGR2A/FCGR1A/FGR/SRC/PLD3/PLD1/PIK3CB/AHCYL1/PAK1/VAV1/MYO9B/ITPR2/WIPF2/ARPC1A/MAPK1/MYO1C/MYO5A/WASF2/HSP90AA1	46
R-HSA-166058	MyD88:MAL(TIRAP) cascade initiated on plasma membrane	49/2093	95/10654	3.02367e-12	4.95321e-11	3.12757e-11	MEF2C/BTK/UBE2N/RPS27A/UBA52/UBB/MAP3K8/NFKB1/NFKBIA/RIPK2/UBC/LY96/HMGB1/NFKB2/CD14/DUSP6/IRAK3/CD36/TLR2/TLR4/S100A12/FOS/MAP2K3/IRAK2/DUSP3/PPP2CB/PELI1/IRAK1/JUN/APP/MAP2K1/MAPKAPK2/CUL1/PPP2CA/RPS6KA1/TLR1/MAPKAPK3/TNIP2/MEF2A/MAP3K1/TAB2/MYD88/RELA/RPS6KA3/SKP1/DUSP4/MAPK1/MAP2K7/MAPK8	49
R-HSA-168188	Toll Like Receptor TLR6:TLR2 Cascade	49/2093	95/10654	3.02367e-12	4.95321e-11	3.12757e-11	MEF2C/BTK/UBE2N/RPS27A/UBA52/UBB/MAP3K8/NFKB1/NFKBIA/RIPK2/UBC/LY96/HMGB1/NFKB2/CD14/DUSP6/IRAK3/CD36/TLR2/TLR4/S100A12/FOS/MAP2K3/IRAK2/DUSP3/PPP2CB/PELI1/IRAK1/JUN/APP/MAP2K1/MAPKAPK2/CUL1/PPP2CA/RPS6KA1/TLR1/MAPKAPK3/TNIP2/MEF2A/MAP3K1/TAB2/MYD88/RELA/RPS6KA3/SKP1/DUSP4/MAPK1/MAP2K7/MAPK8	49
R-HSA-1234174	Cellular response to hypoxia	42/2093	75/10654	3.05209e-12	4.95321e-11	3.12757e-11	PSMA4/PSMA2/PSME2/PSMB9/PSMB2/PSMA1/RBX1/PSMB7/PSME1/PSMB6/PSMB8/PSMB10/PSMA7/PSMB1/RPS27A/UBA52/UBB/UBC/HIF1A/PSMA6/SEM1/ELOB/PSMD8/VEGFA/UBE2D1/CITED2/ELOC/PSMC4/PSMA5/UBE2D3/PSMC1/EGLN3/HIGD1A/PSMB5/PSMD1/PSMD7/PSMB4/PSMA3/PSMD11/PSMD4/PSMD2/PSMD14	42
R-HSA-5676590	NIK-->noncanonical NF-kB signaling	36/2093	59/10654	3.36211e-12	5.39138e-11	3.40424e-11	PSMA4/PSMA2/PSME2/PSMB9/PSMB2/PSMA1/PSMB7/PSME1/PSMB6/PSMB8/PSMB10/PSMA7/PSMB1/RPS27A/UBA52/UBB/UBC/PSMA6/SEM1/PSMD8/NFKB2/CUL1/RELB/SKP1/PSMC4/PSMA5/PSMC1/PSMB5/PSMD1/PSMD7/PSMB4/PSMA3/PSMD11/PSMD4/PSMD2/PSMD14	36
R-HSA-6783783	Interleukin-10 signaling	31/2093	47/10654	5.55085e-12	8.56855e-11	5.41037e-11	CD86/CXCL10/CCL22/TIMP1/TNFRSF1B/ICAM1/TNF/CXCL2/IL1RN/CXCL8/IL1B/IL10RA/JAK1/STAT3/CXCL1/PTGS2/IL6/CCL2/CSF3/PTAFR/IL10/IL1A/CCR1/CCR5/FPR1/IL18/CCL20/CD80/IL1R1/IL10RB/CCL19	31
R-HSA-9020591	Interleukin-12 signaling	31/2093	47/10654	5.55085e-12	8.56855e-11	5.41037e-11	RPLP0/PSME2/PPIA/ANXA2/CAPZA1/MIF/HNRNPA2B1/CFL1/STAT4/HNRNPDL/PDCD4/IFNG/LCP1/P4HB/SOD1/SOD2/RAP1B/MSN/ARF1/JAK1/CDC42/TALDO1/GSTO1/RALA/IL10/PITPNA/JAK2/PAK2/HSPA9/LMNB1/CNN2	31
R-HSA-180534	Vpu mediated degradation of CD4	33/2093	52/10654	5.66148e-12	8.56855e-11	5.41037e-11	PSMA4/PSMA2/PSME2/PSMB9/PSMB2/PSMA1/PSMB7/PSME1/PSMB6/PSMB8/PSMB10/PSMA7/PSMB1/RPS27A/UBA52/UBB/UBC/PSMA6/SEM1/PSMD8/SKP1/PSMC4/PSMA5/PSMC1/PSMB5/PSMD1/PSMD7/PSMB4/PSMA3/PSMD11/PSMD4/PSMD2/PSMD14	33
R-HSA-349425	Autodegradation of the E3 ubiquitin ligase COP1	33/2093	52/10654	5.66148e-12	8.56855e-11	5.41037e-11	PSMA4/PSMA2/PSME2/PSMB9/PSMB2/PSMA1/PSMB7/PSME1/PSMB6/PSMB8/PSMB10/PSMA7/PSMB1/ATM/RPS27A/UBA52/UBB/UBC/PSMA6/SEM1/PSMD8/PSMC4/PSMA5/PSMC1/PSMB5/PSMD1/PSMD7/PSMB4/PSMA3/PSMD11/PSMD4/PSMD2/PSMD14	33
R-HSA-75815	Ubiquitin-dependent degradation of Cyclin D	33/2093	52/10654	5.66148e-12	8.56855e-11	5.41037e-11	PSMA4/PSMA2/PSME2/PSMB9/PSMB2/CDK4/PSMA1/PSMB7/PSME1/PSMB6/PSMB8/PSMB10/PSMA7/PSMB1/RPS27A/UBA52/UBB/UBC/PSMA6/SEM1/PSMD8/PSMC4/PSMA5/PSMC1/PSMB5/PSMD1/PSMD7/PSMB4/PSMA3/PSMD11/PSMD4/PSMD2/PSMD14	33
R-HSA-2871837	FCERI mediated NF-kB activation	44/2093	82/10654	6.71765e-12	9.9436e-11	6.27861e-11	LYN/PSMA4/PSMA2/PSME2/UBE2N/PSMB9/PSMB2/PSMA1/PSMB7/PSME1/PSMB6/PSMB8/PSMB10/FCER1G/PSMA7/PSMB1/RASGRP1/RPS27A/UBA52/UBB/NFKB1/NFKBIA/UBC/PSMA6/SEM1/PSMD8/UBE2D1/CUL1/TAB2/RELA/SKP1/PSMC4/PSMA5/PSMC1/MALT1/PSMB5/PSMD1/PSMD7/PSMB4/PSMA3/PSMD11/PSMD4/PSMD2/PSMD14	44
R-HSA-9013694	Signaling by NOTCH4	44/2093	82/10654	6.71765e-12	9.9436e-11	6.27861e-11	PSMA4/PSMA2/PSME2/PSMB9/PSMB2/YWHAZ/PSMA1/RBX1/PSMB7/PSME1/PSMB6/PSMB8/PSMB10/PSMA7/PSMB1/RPS27A/UBA52/UBB/UBC/PSMA6/SEM1/PSENEN/PSMD8/RBPJ/NOTCH2/PSEN1/ADAM10/CUL1/NCSTN/MAML2/SKP1/PSMC4/PSMA5/PSMC1/DLL4/PSMB5/PSMD1/PSMD7/PSMB4/PSMA3/PSMD11/PSMD4/PSMD2/PSMD14	44
R-HSA-174113	SCF-beta-TrCP mediated degradation of Emi1	34/2093	55/10654	7.96242e-12	1.15327e-10	7.28199e-11	PSMA4/PSMA2/PSME2/PSMB9/PSMB2/PSMA1/PSMB7/PSME1/PSMB6/PSMB8/PSMB10/PSMA7/PSMB1/RPS27A/UBA52/UBB/UBC/PSMA6/SEM1/PSMD8/CUL1/SKP1/PSMC4/PSMA5/PSMC1/PSMB5/PSMD1/PSMD7/PSMB4/PSMA3/PSMD11/PSMD4/PSMD2/PSMD14	34
R-HSA-8941858	Regulation of RUNX3 expression and activity	34/2093	55/10654	7.96242e-12	1.15327e-10	7.28199e-11	PSMA4/PSMA2/PSME2/PSMB9/PSMB2/PSMA1/PSMB7/PSME1/PSMB6/PSMB8/PSMB10/PSMA7/PSMB1/RPS27A/UBA52/UBB/RUNX3/UBC/PSMA6/SEM1/PSMD8/SRC/PSMC4/PSMA5/PSMC1/PSMB5/PSMD1/PSMD7/PSMB4/PSMA3/PSMD11/PSMD4/PSMD2/PSMD14	34
R-HSA-168164	Toll Like Receptor 3 (TLR3) Cascade	48/2093	94/10654	8.09975e-12	1.16068e-10	7.32877e-11	MEF2C/UBE2N/TANK/IRF7/RPS27A/UBA52/UBB/MAP3K8/NFKB1/NFKBIA/RIPK2/UBC/HMGB1/NFKB2/BIRC3/IRF3/DUSP6/S100A12/FOS/MAP2K3/IRAK2/UBE2D1/DUSP3/PPP2CB/IRAK1/JUN/APP/MAP2K1/TBK1/MAPKAPK2/CUL1/BIRC2/PPP2CA/RPS6KA1/MAPKAPK3/TNIP2/MEF2A/TAB2/RELA/RPS6KA3/SKP1/CASP8/DUSP4/MAPK1/UBE2D3/MAP2K7/MAPK8/TRAF3	48
R-HSA-8852276	The role of GTSE1 in G2/M progression after G2 checkpoint	42/2093	77/10654	9.88643e-12	1.40179e-10	8.85123e-11	TUBA1B/HSP90AB1/PSMA4/PSMA2/PSME2/PSMB9/TUBA1C/PSMB2/TUBB4B/PSMA1/PSMB7/PSME1/PSMB6/PSMB8/PSMB10/PSMA7/PSMB1/RPS27A/UBA52/UBB/CDKN1A/UBC/PSMA6/SEM1/PSMD8/TUBA1A/TUBB6/PSMC4/PSMA5/PSMC1/TUBB2A/PSMB5/MAPRE1/PSMD1/PSMD7/PSMB4/PSMA3/PSMD11/PSMD4/PSMD2/PSMD14/HSP90AA1	42
R-HSA-169911	Regulation of Apoptosis	33/2093	53/10654	1.21859e-11	1.70983e-10	1.07963e-10	PSMA4/PSMA2/PSME2/PSMB9/PSMB2/PSMA1/PSMB7/PSME1/PSMB6/PSMB8/PSMB10/PSMA7/PSMB1/RPS27A/UBA52/UBB/UBC/PSMA6/SEM1/PSMD8/PAK2/PSMC4/PSMA5/PSMC1/PSMB5/PSMD1/PSMD7/PSMB4/PSMA3/PSMD11/PSMD4/PSMD2/PSMD14	33
R-HSA-168179	Toll Like Receptor TLR1:TLR2 Cascade	49/2093	98/10654	1.33316e-11	1.83241e-10	1.15702e-10	MEF2C/BTK/UBE2N/RPS27A/UBA52/UBB/MAP3K8/NFKB1/NFKBIA/RIPK2/UBC/LY96/HMGB1/NFKB2/CD14/DUSP6/IRAK3/CD36/TLR2/TLR4/S100A12/FOS/MAP2K3/IRAK2/DUSP3/PPP2CB/PELI1/IRAK1/JUN/APP/MAP2K1/MAPKAPK2/CUL1/PPP2CA/RPS6KA1/TLR1/MAPKAPK3/TNIP2/MEF2A/MAP3K1/TAB2/MYD88/RELA/RPS6KA3/SKP1/DUSP4/MAPK1/MAP2K7/MAPK8	49
R-HSA-181438	Toll Like Receptor 2 (TLR2) Cascade	49/2093	98/10654	1.33316e-11	1.83241e-10	1.15702e-10	MEF2C/BTK/UBE2N/RPS27A/UBA52/UBB/MAP3K8/NFKB1/NFKBIA/RIPK2/UBC/LY96/HMGB1/NFKB2/CD14/DUSP6/IRAK3/CD36/TLR2/TLR4/S100A12/FOS/MAP2K3/IRAK2/DUSP3/PPP2CB/PELI1/IRAK1/JUN/APP/MAP2K1/MAPKAPK2/CUL1/PPP2CA/RPS6KA1/TLR1/MAPKAPK3/TNIP2/MEF2A/MAP3K1/TAB2/MYD88/RELA/RPS6KA3/SKP1/DUSP4/MAPK1/MAP2K7/MAPK8	49
R-HSA-69601	Ubiquitin Mediated Degradation of Phosphorylated Cdc25A	32/2093	52/10654	3.92238e-11	5.23113e-10	3.30305e-10	PSMA4/PSMA2/PSME2/PSMB9/PSMB2/PSMA1/PSMB7/PSME1/PSMB6/PSMB8/PSMB10/PSMA7/PSMB1/RPS27A/UBA52/UBB/UBC/PSMA6/SEM1/PSMD8/PSMC4/PSMA5/PSMC1/PSMB5/PSMD1/PSMD7/PSMB4/PSMA3/PSMD11/PSMD4/PSMD2/PSMD14	32
R-HSA-69610	p53-Independent DNA Damage Response	32/2093	52/10654	3.92238e-11	5.23113e-10	3.30305e-10	PSMA4/PSMA2/PSME2/PSMB9/PSMB2/PSMA1/PSMB7/PSME1/PSMB6/PSMB8/PSMB10/PSMA7/PSMB1/RPS27A/UBA52/UBB/UBC/PSMA6/SEM1/PSMD8/PSMC4/PSMA5/PSMC1/PSMB5/PSMD1/PSMD7/PSMB4/PSMA3/PSMD11/PSMD4/PSMD2/PSMD14	32
R-HSA-69613	p53-Independent G1/S DNA damage checkpoint	32/2093	52/10654	3.92238e-11	5.23113e-10	3.30305e-10	PSMA4/PSMA2/PSME2/PSMB9/PSMB2/PSMA1/PSMB7/PSME1/PSMB6/PSMB8/PSMB10/PSMA7/PSMB1/RPS27A/UBA52/UBB/UBC/PSMA6/SEM1/PSMD8/PSMC4/PSMA5/PSMC1/PSMB5/PSMD1/PSMD7/PSMB4/PSMA3/PSMD11/PSMD4/PSMD2/PSMD14	32
R-HSA-5683057	MAPK family signaling cascades	105/2093	294/10654	4.90366e-11	6.47571e-10	4.08891e-10	RASGRP3/GRB2/PHB/LAT/PEA15/PSMA4/ACTB/PSMA2/PSME2/FYN/ACTG1/PSMB9/NCOA3/PSMB2/PSMA1/RBX1/PSMB7/PSME1/PPP2R5C/PSMB6/CALM2/PEBP1/CCND3/PSMB8/PSMB10/PSMA7/PSMB1/RASGRP1/FLT3LG/ARRB2/CALM1/RPS27A/UBA52/IQGAP1/UBB/IL2RB/SEPTIN7/MYC/DUSP10/TLN1/RAC1/IL2RA/RAP1B/DNAJB1/UBC/IL2RG/PSMA6/JAK1/CDC42/SEM1/PSMD8/IL6/EREG/DUSP1/DUSP6/RAPGEF2/CSF2RB/CSF2RA/SRC/IL3RA/CDC42EP2/PPP2CB/MAPK6/ARRB1/JUN/MAP2K1/IRS2/D…	105
R-HSA-174084	Autodegradation of Cdh1 by Cdh1:APC/C	36/2093	63/10654	4.96086e-11	6.48765e-10	4.09645e-10	PSMA4/PSMA2/PSME2/PSMB9/PSMB2/PSMA1/PSMB7/PSME1/PSMB6/ANAPC11/PSMB8/PSMB10/PSMA7/PSMB1/RPS27A/UBA52/UBB/UBC/PSMA6/SEM1/PSMD8/UBE2D1/UBE2E1/ANAPC16/PSMC4/PSMA5/PSMC1/PSMB5/PSMD1/PSMD7/PSMB4/PSMA3/PSMD11/PSMD4/PSMD2/PSMD14	36
R-HSA-4641257	Degradation of AXIN	33/2093	55/10654	5.16876e-11	6.69454e-10	4.22709e-10	PSMA4/PSMA2/PSME2/PSMB9/PSMB2/PSMA1/PSMB7/PSME1/PSMB6/PSMB8/PSMB10/PSMA7/PSMB1/RPS27A/UBA52/UBB/UBC/PSMA6/SEM1/PSMD8/TNKS2/PSMC4/PSMA5/PSMC1/PSMB5/PSMD1/PSMD7/PSMB4/PSMA3/PSMD11/PSMD4/PSMD2/PSMD14	33
R-HSA-2029482	Regulation of actin dynamics for phagocytic cup formation	35/2093	61/10654	7.86886e-11	1.00946e-09	6.37397e-10	BTK/SYK/CD247/GRB2/HSP90AB1/CD3G/ACTB/ACTG1/ARPC3/ARPC4/CFL1/ARPC1B/ARPC5/ARPC2/BRK1/FCGR3A/RAC1/ACTR2/ABI1/CDC42/MYH9/ACTR3/WIPF1/FCGR2A/FCGR1A/PAK1/VAV1/MYO9B/WIPF2/ARPC1A/MAPK1/MYO1C/MYO5A/WASF2/HSP90AA1	35
R-HSA-168181	Toll Like Receptor 7/8 (TLR7/8) Cascade	46/2093	93/10654	9.04999e-11	1.13928e-09	7.1937e-10	MEF2C/UBE2N/IRF7/RPS27A/UBA52/UBB/MAP3K8/NFKB1/NFKBIA/RIPK2/UBC/LY96/HMGB1/NFKB2/CD14/DUSP6/TLR8/TLR4/S100A12/FOS/MAP2K3/IRAK2/DUSP3/PPP2CB/PELI1/IRAK1/JUN/APP/MAP2K1/MAPKAPK2/CUL1/PPP2CA/RPS6KA1/MAPKAPK3/TNIP2/MEF2A/MAP3K1/TAB2/MYD88/RELA/RPS6KA3/SKP1/DUSP4/MAPK1/MAP2K7/MAPK8	46
R-HSA-975155	MyD88 dependent cascade initiated on endosome	46/2093	93/10654	9.04999e-11	1.13928e-09	7.1937e-10	MEF2C/UBE2N/IRF7/RPS27A/UBA52/UBB/MAP3K8/NFKB1/NFKBIA/RIPK2/UBC/LY96/HMGB1/NFKB2/CD14/DUSP6/TLR8/TLR4/S100A12/FOS/MAP2K3/IRAK2/DUSP3/PPP2CB/PELI1/IRAK1/JUN/APP/MAP2K1/MAPKAPK2/CUL1/PPP2CA/RPS6KA1/MAPKAPK3/TNIP2/MEF2A/MAP3K1/TAB2/MYD88/RELA/RPS6KA3/SKP1/DUSP4/MAPK1/MAP2K7/MAPK8	46
R-HSA-5663202	Diseases of signal transduction	126/2093	377/10654	9.58407e-11	1.19535e-09	7.54769e-10	CD19/CD86/GRB2/LCK/PHB/PSMA4/ACTB/PSMA2/PSME2/FYN/ACTG1/TRAT1/PSMB9/PSMB2/PSMA1/RBX1/PSMB7/AP3B1/PSME1/FKBP1A/PPP2R5C/PSMB6/CALM2/ICOS/PEBP1/LRRFIP1/PSMB8/PSMB10/RAC2/PIK3R1/PSMA7/PSMB1/ARRB2/CALM1/RPS27A/PIK3AP1/UBA52/IQGAP1/UBB/CDKN1A/MYC/TLN1/RAC1/RAP1B/UBC/ADAM17/QKI/PSMA6/POLR2K/MPRIP/SEM1/PSENEN/OS9/ERLEC1/DERL2/PSMD8/POLR2L/RHOG/RBPJ/STAT3/EREG/LMNA/AGTRAP/SRC/CD80/PPP2CB/GAB2/PIK3CB/KDM7A…	126
R-HSA-174154	APC/C:Cdc20 mediated degradation of Securin	37/2093	67/10654	1.04693e-10	1.29377e-09	8.16917e-10	PSMA4/PSMA2/PSME2/PTTG1/PSMB9/PSMB2/PSMA1/PSMB7/PSME1/PSMB6/ANAPC11/PSMB8/PSMB10/PSMA7/PSMB1/RPS27A/UBA52/UBB/UBC/PSMA6/SEM1/PSMD8/UBE2D1/UBE2E1/ANAPC16/PSMC4/PSMA5/PSMC1/PSMB5/PSMD1/PSMD7/PSMB4/PSMA3/PSMD11/PSMD4/PSMD2/PSMD14	37
R-HSA-351202	Metabolism of polyamines	34/2093	59/10654	1.24664e-10	1.51414e-09	9.56064e-10	OAZ1/PSMA4/PSMA2/PSME2/PSMB9/PSMB2/SMS/PSMA1/PSMB7/PSME1/PSMB6/PSMB8/PSMB10/PSMA7/PSMB1/OAZ2/PSMA6/SAT1/SEM1/PSMD8/AZIN1/AMD1/PSMC4/PSMA5/PSMC1/PSMB5/PSMD1/PSMD7/PSMB4/PSMA3/PSMD11/PSMD4/PSMD2/PSMD14	34
R-HSA-350562	Regulation of ornithine decarboxylase (ODC)	31/2093	51/10654	1.24773e-10	1.51414e-09	9.56064e-10	OAZ1/PSMA4/PSMA2/PSME2/PSMB9/PSMB2/PSMA1/PSMB7/PSME1/PSMB6/PSMB8/PSMB10/PSMA7/PSMB1/OAZ2/PSMA6/SEM1/PSMD8/AZIN1/PSMC4/PSMA5/PSMC1/PSMB5/PSMD1/PSMD7/PSMB4/PSMA3/PSMD11/PSMD4/PSMD2/PSMD14	31
R-HSA-198933	Immunoregulatory interactions between a Lymphoid and a non-Lymphoid cell	58/2093	132/10654	1.44838e-10	1.74194e-09	1.0999e-09	CD40/CD19/CD22/CD3D/FCGR2B/CD3E/CD247/LILRB1/CD3G/CLEC2B/HCST/KLRB1/SH2D1A/CD8B/TYROBP/KLRD1/CD96/JAML/B2M/SLAMF7/HLA-B/SELL/HLA-A/KLRF1/KLRC1/FCGR3A/HLA-C/ICAM1/KLRG1/ITGB2/CD81/HLA-F/ITGAL/PILRB/ITGA4/CD8A/CLEC2D/CD99/LILRB4/PILRA/CD300E/FCGR1A/NECTIN2/LILRA5/TREM1/SIGLEC9/LILRA2/SIGLEC1/LAIR1/SIGLEC7/IFITM1/ICAM3/HLA-E/ICAM2/SH2D1B/CD300A/CD200/PVR	58
R-HSA-162906	HIV Infection	87/2093	233/10654	1.71936e-10	2.04954e-09	1.29412e-09	CD247/SLC25A6/LCK/RAN/TCEA1/PSMA4/HMGA1/PSMA2/PSME2/FYN/PPIA/PSMB9/BANF1/PSMB2/PSMA1/RBX1/PSMB7/CD8B/PSME1/GTF2A2/SLC25A5/PSMB6/PSMB8/PSMB10/TAF7/PSMA7/PSMB1/NPM1/RPS27A/B2M/APOBEC3G/UBA52/HCK/UBB/RAC1/UBC/ARF1/FURIN/AP2S1/PSMA6/POLR2K/SEM1/ELOB/PSMD8/POLR2L/CHMP4A/CCR5/AP1S2/CHMP4B/NUP58/NUP62/ELL/PAK2/NUP214/TAF13/CHMP2A/ELOC/CHMP5/POLR2E/CXCR4/SKP1/RNMT/TPR/NMT2/POLR2C/VPS37B/POLR2H/MNAT1/PSMC…	87
R-HSA-4641258	Degradation of DVL	33/2093	57/10654	1.97241e-10	2.31029e-09	1.45877e-09	PSMA4/PSMA2/PSME2/PSMB9/PSMB2/PSMA1/RBX1/PSMB7/PSME1/PSMB6/PSMB8/PSMB10/PSMA7/PSMB1/RPS27A/UBA52/UBB/UBC/PSMA6/SEM1/PSMD8/PSMC4/PSMA5/PSMC1/PSMB5/PSMD1/PSMD7/PSMB4/PSMA3/PSMD11/PSMD4/PSMD2/PSMD14	33
R-HSA-69541	Stabilization of p53	33/2093	57/10654	1.97241e-10	2.31029e-09	1.45877e-09	PSMA4/PSMA2/PSME2/PSMB9/PSMB2/PSMA1/PSMB7/PSME1/PSMB6/PSMB8/PSMB10/PSMA7/PSMB1/ATM/RPS27A/UBA52/UBB/UBC/PSMA6/SEM1/PSMD8/PSMC4/PSMA5/PSMC1/PSMB5/PSMD1/PSMD7/PSMB4/PSMA3/PSMD11/PSMD4/PSMD2/PSMD14	33
R-HSA-5619084	ABC transporter disorders	40/2093	77/10654	2.26402e-10	2.629e-09	1.66001e-09	PSMA4/PSMA2/PSME2/PSMB9/PSMB2/PSMA1/PSMB7/PSME1/PSMB6/PSMB8/PSMB10/PSMA7/PSMB1/RPS27A/UBA52/UBB/UBC/PSMA6/SEM1/OS9/ERLEC1/DERL2/PSMD8/ABCA1/SEL1L/VCP/RNF5/DERL1/PSMC4/PSMA5/PSMC1/PSMB5/PSMD1/PSMD7/PSMB4/PSMA3/PSMD11/PSMD4/PSMD2/PSMD14	40
R-HSA-975138	TRAF6 mediated induction of NFkB and MAP kinases upon TLR7/8 or 9 activation	45/2093	92/10654	2.32427e-10	2.67589e-09	1.68962e-09	MEF2C/UBE2N/RPS27A/UBA52/UBB/MAP3K8/NFKB1/NFKBIA/RIPK2/UBC/LY96/HMGB1/NFKB2/CD14/DUSP6/TLR8/TLR4/S100A12/FOS/MAP2K3/IRAK2/DUSP3/PPP2CB/PELI1/IRAK1/JUN/APP/MAP2K1/MAPKAPK2/CUL1/PPP2CA/RPS6KA1/MAPKAPK3/TNIP2/MEF2A/MAP3K1/TAB2/MYD88/RELA/RPS6KA3/SKP1/DUSP4/MAPK1/MAP2K7/MAPK8	45
R-HSA-69202	Cyclin E associated events during G1/S transition	42/2093	83/10654	2.37312e-10	2.70898e-09	1.71051e-09	CKS1B/PSMA4/PSMA2/PSME2/PSMB9/PSMB2/CDK4/PSMA1/PSMB7/PSME1/PSMB6/PSMB8/PSMB10/PSMA7/PSMB1/RPS27A/UBA52/UBB/CDKN1A/MYC/UBC/PSMA6/SEM1/PSMD8/RBL2/RB1/CUL1/SKP1/MNAT1/PSMC4/PSMA5/RBBP4/PSMC1/PSMB5/PSMD1/PSMD7/PSMB4/PSMA3/PSMD11/PSMD4/PSMD2/PSMD14	42
R-HSA-1236978	Cross-presentation of soluble exogenous antigens (endosomes)	30/2093	50/10654	3.92037e-10	4.43759e-09	2.802e-09	PSMA4/PSMA2/PSME2/PSMB9/PSMB2/PSMA1/PSMB7/PSME1/PSMB6/PSMB8/PSMB10/PSMA7/PSMB1/PSMA6/SEM1/PSMD8/FCGR1A/FCGR1B/PSMC4/PSMA5/PSMC1/PSMB5/PSMD1/PSMD7/PSMB4/PSMA3/PSMD11/PSMD4/PSMD2/PSMD14	30
R-HSA-168138	Toll Like Receptor 9 (TLR9) Cascade	46/2093	97/10654	5.44271e-10	6.10944e-09	3.85764e-09	MEF2C/UBE2N/IRF7/RPS27A/UBA52/UBB/MAP3K8/NFKB1/NFKBIA/RIPK2/UBC/LY96/HMGB1/NFKB2/CD14/DUSP6/TLR8/TLR4/S100A12/FOS/MAP2K3/IRAK2/DUSP3/PPP2CB/PELI1/IRAK1/JUN/APP/MAP2K1/MAPKAPK2/CUL1/PPP2CA/RPS6KA1/MAPKAPK3/TNIP2/MEF2A/MAP3K1/TAB2/MYD88/RELA/RPS6KA3/SKP1/DUSP4/MAPK1/MAP2K7/MAPK8	46
R-HSA-168142	Toll Like Receptor 10 (TLR10) Cascade	42/2093	85/10654	6.18225e-10	6.71572e-09	4.24046e-09	MEF2C/TLR10/UBE2N/RPS27A/UBA52/UBB/MAP3K8/NFKB1/NFKBIA/RIPK2/UBC/HMGB1/NFKB2/DUSP6/S100A12/FOS/MAP2K3/IRAK2/DUSP3/PPP2CB/PELI1/IRAK1/JUN/APP/MAP2K1/MAPKAPK2/CUL1/PPP2CA/RPS6KA1/MAPKAPK3/TNIP2/MEF2A/MAP3K1/TAB2/MYD88/RELA/RPS6KA3/SKP1/DUSP4/MAPK1/MAP2K7/MAPK8	42
R-HSA-168176	Toll Like Receptor 5 (TLR5) Cascade	42/2093	85/10654	6.18225e-10	6.71572e-09	4.24046e-09	MEF2C/TLR10/UBE2N/RPS27A/UBA52/UBB/MAP3K8/NFKB1/NFKBIA/RIPK2/UBC/HMGB1/NFKB2/DUSP6/S100A12/FOS/MAP2K3/IRAK2/DUSP3/PPP2CB/PELI1/IRAK1/JUN/APP/MAP2K1/MAPKAPK2/CUL1/PPP2CA/RPS6KA1/MAPKAPK3/TNIP2/MEF2A/MAP3K1/TAB2/MYD88/RELA/RPS6KA3/SKP1/DUSP4/MAPK1/MAP2K7/MAPK8	42
R-HSA-69656	Cyclin A:Cdk2-associated events at S phase entry	42/2093	85/10654	6.18225e-10	6.71572e-09	4.24046e-09	CKS1B/PSMA4/PSMA2/PSME2/PSMB9/PSMB2/CDK4/PSMA1/PSMB7/PSME1/PSMB6/PSMB8/PSMB10/PSMA7/PSMB1/RPS27A/UBA52/UBB/CDKN1A/MYC/UBC/PSMA6/SEM1/PSMD8/RBL2/RB1/CUL1/SKP1/MNAT1/PSMC4/PSMA5/RBBP4/PSMC1/PSMB5/PSMD1/PSMD7/PSMB4/PSMA3/PSMD11/PSMD4/PSMD2/PSMD14	42
R-HSA-975871	MyD88 cascade initiated on plasma membrane	42/2093	85/10654	6.18225e-10	6.71572e-09	4.24046e-09	MEF2C/TLR10/UBE2N/RPS27A/UBA52/UBB/MAP3K8/NFKB1/NFKBIA/RIPK2/UBC/HMGB1/NFKB2/DUSP6/S100A12/FOS/MAP2K3/IRAK2/DUSP3/PPP2CB/PELI1/IRAK1/JUN/APP/MAP2K1/MAPKAPK2/CUL1/PPP2CA/RPS6KA1/MAPKAPK3/TNIP2/MEF2A/MAP3K1/TAB2/MYD88/RELA/RPS6KA3/SKP1/DUSP4/MAPK1/MAP2K7/MAPK8	42
R-HSA-163200	Respiratory electron transport, ATP synthesis by chemiosmotic coupling, and heat production by uncoupling proteins.	54/2093	123/10654	6.46898e-10	6.97097e-09	4.40163e-09	ND4/COX2/ATP5MC1/COX20/COX3/ATP6/ND1/ND5/COX5A/ND2/UQCRH/UQCRB/COX6A1/ATP5F1B/UCP2/ND3/NDUFAB1/CYCS/COX16/ATP5MC3/UQCRQ/NDUFB2/NDUFB7/NDUFS6/CYTB/ATP5PF/NDUFA13/ATP5MF/COX7B/COX6C/NDUFA4/COX5B/COX1/COX7C/COX4I1/NDUFV2/COX8A/NDUFA1/UQCR11/UQCR10/NDUFA2/ATP5F1E/ATP5MC2/ATP5MG/NDUFV3/ATP8/ATP5F1A/ATP5PO/NDUFS5/ATP5PD/NDUFA6/NDUFS4/NDUFA9/NDUFA11	54
R-HSA-5658442	Regulation of RAS by GAPs	36/2093	68/10654	9.07185e-10	9.69824e-09	6.12369e-09	PSMA4/PSMA2/PSME2/PSMB9/PSMB2/PSMA1/RBX1/PSMB7/PSME1/PSMB6/PSMB8/PSMB10/PSMA7/PSMB1/RPS27A/UBA52/UBB/UBC/PSMA6/SEM1/PSMD8/NRAS/PSMC4/PSMA5/PSMC1/SPRED2/PSMB5/PSMD1/KRAS/PSMD7/PSMB4/PSMA3/PSMD11/PSMD4/PSMD2/PSMD14	36
R-HSA-983169	Class I MHC mediated antigen processing & presentation	121/2093	371/10654	1.26526e-09	1.34197e-08	8.47351e-09	BTK/NCF4/SNAP23/PSMA4/PSMA2/PSME2/UBE2N/NCF1/PSMB9/UBE2J1/PSMB2/UBE2L6/PSMA1/RBX1/PSMB7/PSME1/PSMB6/ANAPC11/DTX3L/PSMB8/PSMB10/TAP1/PSMA7/PSMB1/SEC61B/RNF213/RPS27A/B2M/HLA-B/HLA-A/UBA52/CYBB/UBB/HLA-C/SEC61G/UBE2F/HSPA5/PDIA3/RNF19A/CALR/VAMP8/CTSS/UBC/SEC61A1/CYBA/LY96/UBE2A/CANX/PSMA6/ERAP2/UBE2Z/HLA-F/SEM1/ELOB/TAPBP/PSMD8/UBE2L3/CBLB/WSB1/CTSL/CD14/NCF2/RNF19B/SOCS3/RNF144B/CD36/RNF130/FCGR1…	121
R-HSA-69563	p53-Dependent G1 DNA Damage Response	35/2093	66/10654	1.4631e-09	1.52775e-08	9.64654e-09	PSMA4/PSMA2/PSME2/PSMB9/PSMB2/PSMA1/PSMB7/PSME1/PSMB6/PSMB8/PSMB10/PSMA7/PSMB1/ATM/RPS27A/UBA52/UBB/CDKN1A/UBC/PSMA6/SEM1/PSMD8/ZNF385A/PSMC4/PSMA5/PSMC1/PSMB5/PSMD1/PSMD7/PSMB4/PSMA3/PSMD11/PSMD4/PSMD2/PSMD14	35
R-HSA-69580	p53-Dependent G1/S DNA damage checkpoint	35/2093	66/10654	1.4631e-09	1.52775e-08	9.64654e-09	PSMA4/PSMA2/PSME2/PSMB9/PSMB2/PSMA1/PSMB7/PSME1/PSMB6/PSMB8/PSMB10/PSMA7/PSMB1/ATM/RPS27A/UBA52/UBB/CDKN1A/UBC/PSMA6/SEM1/PSMD8/ZNF385A/PSMC4/PSMA5/PSMC1/PSMB5/PSMD1/PSMD7/PSMB4/PSMA3/PSMD11/PSMD4/PSMD2/PSMD14	35
R-HSA-174178	APC/C:Cdh1 mediated degradation of Cdc20 and other APC/C:Cdh1 targeted proteins in late mitosis/early G1	37/2093	72/10654	1.59359e-09	1.65121e-08	1.04261e-08	PSMA4/PSMA2/PSME2/PTTG1/PSMB9/PSMB2/PSMA1/PSMB7/PSME1/PSMB6/ANAPC11/PSMB8/PSMB10/PSMA7/PSMB1/RPS27A/UBA52/UBB/UBC/PSMA6/SEM1/PSMD8/UBE2D1/UBE2E1/ANAPC16/PSMC4/PSMA5/PSMC1/PSMB5/PSMD1/PSMD7/PSMB4/PSMA3/PSMD11/PSMD4/PSMD2/PSMD14	37
R-HSA-983695	Antigen activates B Cell Receptor (BCR) leading to generation of second messengers	22/2093	32/10654	2.13199e-09	2.1922e-08	1.38421e-08	CD79A/CD79B/BLNK/CD19/BTK/CD22/ORAI2/SYK/LYN/GRB2/PTPN6/FYN/DAPP1/CALM2/PIK3R1/CALM1/PIK3AP1/AHCYL1/VAV1/ITPR2/SH3KBP1/CALM3	22
R-HSA-8939902	Regulation of RUNX2 expression and activity	37/2093	73/10654	2.62446e-09	2.67815e-08	1.69104e-08	PSMA4/PSMA2/PSME2/PSMB9/PSMB2/PSMA1/RBX1/PSMB7/PSME1/PSMB6/PSMB8/PSMB10/PSMA7/PSMB1/RPS27A/UBA52/UBB/UBC/PSMA6/SEM1/PSMD8/CUL1/SKP1/PSMC4/PSMA5/PSMC1/RUNX2/PSMB5/PSMD1/PSMD7/PSMB4/PSMA3/PSMD11/PSMD4/PSMD2/PSMD14/STAT1	37
R-HSA-4086400	PCP/CE pathway	43/2093	92/10654	3.47586e-09	3.52029e-08	2.22279e-08	PRKCB/PSMA4/PSMA2/PSME2/PSMB9/PSMB2/PSMA1/PSMB7/PSME1/PSMB6/PSMB8/PSMB10/RAC2/PSMA7/PSMB1/ARRB2/RPS27A/UBA52/UBB/PFN1/RAC1/UBC/RHOA/AP2S1/PSMA6/SEM1/PSMD8/CLTC/CLTA/PSMC4/PSMA5/PSMC1/PSMB5/DAAM1/PSMD1/PSMD7/AP2M1/PSMB4/PSMA3/PSMD11/PSMD4/PSMD2/PSMD14	43
R-HSA-68827	CDT1 association with the CDC6:ORC:origin complex	32/2093	59/10654	3.52333e-09	3.54174e-08	2.23633e-08	PSMA4/PSMA2/PSME2/PSMB9/PSMB2/PSMA1/PSMB7/PSME1/PSMB6/PSMB8/PSMB10/PSMA7/PSMB1/RPS27A/UBA52/UBB/UBC/PSMA6/SEM1/PSMD8/PSMC4/PSMA5/PSMC1/PSMB5/PSMD1/PSMD7/PSMB4/PSMA3/PSMD11/PSMD4/PSMD2/PSMD14	32
R-HSA-69615	G1/S DNA Damage Checkpoints	35/2093	68/10654	4.16555e-09	4.15629e-08	2.62438e-08	PSMA4/PSMA2/PSME2/PSMB9/PSMB2/PSMA1/PSMB7/PSME1/PSMB6/PSMB8/PSMB10/PSMA7/PSMB1/ATM/RPS27A/UBA52/UBB/CDKN1A/UBC/PSMA6/SEM1/PSMD8/ZNF385A/PSMC4/PSMA5/PSMC1/PSMB5/PSMD1/PSMD7/PSMB4/PSMA3/PSMD11/PSMD4/PSMD2/PSMD14	35
R-HSA-68949	Orc1 removal from chromatin	36/2093	71/10654	4.24519e-09	4.20461e-08	2.65489e-08	MCM5/PSMA4/PSMA2/PSME2/PSMB9/PSMB2/PSMA1/RBX1/PSMB7/PSME1/PSMB6/PSMB8/PSMB10/PSMA7/PSMB1/RPS27A/UBA52/UBB/UBC/PSMA6/SEM1/PSMD8/CUL1/SKP1/PSMC4/PSMA5/PSMC1/PSMB5/PSMD1/PSMD7/PSMB4/PSMA3/PSMD11/PSMD4/PSMD2/PSMD14	36
R-HSA-3858494	Beta-catenin independent WNT signaling	59/2093	146/10654	5.12238e-09	5.03638e-08	3.18009e-08	GNG7/PRKCB/PSMA4/PSMA2/PSME2/PSMB9/TCF7/PSMB2/PSMA1/PSMB7/PSME1/LEF1/GNG5/PSMB6/CALM2/PSMB8/PSMB10/RAC2/PSMA7/PSMB1/ARRB2/CALM1/RPS27A/UBA52/UBB/GNG2/PFN1/RAC1/UBC/RHOA/GNB1/AP2S1/PSMA6/SEM1/PSMD8/GNB4/CLTC/TCF7L2/GNB2/CTNNB1/CLTA/ITPR2/TNRC6B/PSMC4/PSMA5/PSMC1/PSMB5/DAAM1/PSMD1/KRAS/PSMD7/AP2M1/PSMB4/PSMA3/CALM3/PSMD11/PSMD4/PSMD2/PSMD14	59
R-HSA-202433	Generation of second messenger molecules	22/2093	33/10654	5.20881e-09	5.08425e-08	3.21031e-08	HLA-DRA/HLA-DPA1/HLA-DPB1/HLA-DRB1/HLA-DQB1/HLA-DQA1/HLA-DQA2/HLA-DRB5/CD3D/FYB1/CD3E/CD247/LCK/LAT/CD3G/VASP/ITK/GRAP2/LCP2/EVL/PAK1/PAK2	22
R-HSA-5610787	Hedgehog 'off' state	49/2093	113/10654	6.58718e-09	6.38341e-08	4.03063e-08	TUBA1B/IFT57/PSMA4/PSMA2/PSME2/PSMB9/TUBA1C/PSMB2/TUBB4B/PSMA1/RBX1/PSMB7/PSME1/PSMB6/OFD1/PSMB8/PSMB10/PSMA7/PSMB1/RPS27A/UBA52/UBB/UBC/PRKAR1A/PSMA6/NUMB/SEM1/PSMD8/TUBA1A/TUBB6/CUL1/PRKAR2A/GNAS/SKP1/PRKACB/PSMC4/PSMA5/PSMC1/TUBB2A/PSMB5/PSMD1/PSMD7/PSMB4/CSNK1A1/PSMA3/PSMD11/PSMD4/PSMD2/PSMD14	49
R-HSA-176409	APC/C:Cdc20 mediated degradation of mitotic proteins	37/2093	75/10654	6.83412e-09	6.54224e-08	4.13092e-08	PSMA4/PSMA2/PSME2/PTTG1/PSMB9/PSMB2/PSMA1/PSMB7/PSME1/PSMB6/ANAPC11/PSMB8/PSMB10/PSMA7/PSMB1/RPS27A/UBA52/UBB/UBC/PSMA6/SEM1/PSMD8/UBE2D1/UBE2E1/ANAPC16/PSMC4/PSMA5/PSMC1/PSMB5/PSMD1/PSMD7/PSMB4/PSMA3/PSMD11/PSMD4/PSMD2/PSMD14	37
R-HSA-174184	Cdc20:Phospho-APC/C mediated degradation of Cyclin A	36/2093	72/10654	6.89679e-09	6.54224e-08	4.13092e-08	PSMA4/PSMA2/PSME2/PSMB9/PSMB2/PSMA1/PSMB7/PSME1/PSMB6/ANAPC11/PSMB8/PSMB10/PSMA7/PSMB1/RPS27A/UBA52/UBB/UBC/PSMA6/SEM1/PSMD8/UBE2D1/UBE2E1/ANAPC16/PSMC4/PSMA5/PSMC1/PSMB5/PSMD1/PSMD7/PSMB4/PSMA3/PSMD11/PSMD4/PSMD2/PSMD14	36
R-HSA-69017	CDK-mediated phosphorylation and removal of Cdc6	36/2093	72/10654	6.89679e-09	6.54224e-08	4.13092e-08	PSMA4/PSMA2/PSME2/PSMB9/PSMB2/PSMA1/PSMB7/PSME1/PSMB6/ANAPC11/PSMB8/PSMB10/PSMA7/PSMB1/RPS27A/UBA52/UBB/UBC/PSMA6/SEM1/PSMD8/UBE2D1/UBE2E1/ANAPC16/PSMC4/PSMA5/PSMC1/PSMB5/PSMD1/PSMD7/PSMB4/PSMA3/PSMD11/PSMD4/PSMD2/PSMD14	36
R-HSA-176814	Activation of APC/C and APC/C:Cdc20 mediated degradation of mitotic proteins	37/2093	76/10654	1.08174e-08	1.01896e-07	6.43392e-08	PSMA4/PSMA2/PSME2/PTTG1/PSMB9/PSMB2/PSMA1/PSMB7/PSME1/PSMB6/ANAPC11/PSMB8/PSMB10/PSMA7/PSMB1/RPS27A/UBA52/UBB/UBC/PSMA6/SEM1/PSMD8/UBE2D1/UBE2E1/ANAPC16/PSMC4/PSMA5/PSMC1/PSMB5/PSMD1/PSMD7/PSMB4/PSMA3/PSMD11/PSMD4/PSMD2/PSMD14	37
R-HSA-179419	APC:Cdc20 mediated degradation of cell cycle proteins prior to satisfation of the cell cycle checkpoint	36/2093	73/10654	1.10537e-08	1.03398e-07	6.52876e-08	PSMA4/PSMA2/PSME2/PSMB9/PSMB2/PSMA1/PSMB7/PSME1/PSMB6/ANAPC11/PSMB8/PSMB10/PSMA7/PSMB1/RPS27A/UBA52/UBB/UBC/PSMA6/SEM1/PSMD8/UBE2D1/UBE2E1/ANAPC16/PSMC4/PSMA5/PSMC1/PSMB5/PSMD1/PSMD7/PSMB4/PSMA3/PSMD11/PSMD4/PSMD2/PSMD14	36
R-HSA-388841	Costimulation by the CD28 family	35/2093	70/10654	1.1159e-08	1.03663e-07	6.54552e-08	HLA-DRA/HLA-DPA1/HLA-DPB1/HLA-DRB1/HLA-DQB1/HLA-DQA1/HLA-DQA2/HLA-DRB5/CD86/CD3D/CD3E/LYN/CD247/GRB2/LCK/CD3G/PTPN6/FYN/PPP2R5C/ICOS/PIK3R1/GRAP2/MAP3K8/RAC1/CDC42/CD274/SRC/CD80/PPP2CB/PAK1/VAV1/PAK2/PPP2CA/ICOSLG/PDCD1LG2	35
R-HSA-5684996	MAPK1/MAPK3 signaling	88/2093	255/10654	1.24198e-08	1.14585e-07	7.23517e-08	RASGRP3/GRB2/PHB/LAT/PEA15/PSMA4/ACTB/PSMA2/PSME2/FYN/ACTG1/PSMB9/PSMB2/PSMA1/RBX1/PSMB7/PSME1/PPP2R5C/PSMB6/CALM2/PEBP1/PSMB8/PSMB10/PSMA7/PSMB1/RASGRP1/FLT3LG/ARRB2/CALM1/RPS27A/UBA52/IQGAP1/UBB/IL2RB/DUSP10/TLN1/IL2RA/RAP1B/UBC/IL2RG/PSMA6/JAK1/SEM1/PSMD8/IL6/EREG/DUSP1/DUSP6/RAPGEF2/CSF2RB/CSF2RA/SRC/IL3RA/PPP2CB/ARRB1/MAP2K1/IRS2/DUSP2/JAK2/NRAS/IL6ST/IL6R/DUSP5/PPP2CA/MAP3K11/LAMTOR3/LAMTOR…	88
R-HSA-5358351	Signaling by Hedgehog	59/2093	149/10654	1.2579e-08	1.15264e-07	7.27805e-08	TUBA1B/IFT57/PSMA4/PSMA2/PSME2/PSMB9/TUBA1C/PSMB2/TUBB4B/PSMA1/RBX1/PSMB7/PSME1/PSMB6/OFD1/PSMB8/PSMB10/PSMA7/PSMB1/ARRB2/RPS27A/UBA52/UBB/P4HB/UBC/ADAM17/PRKAR1A/PSMA6/NUMB/SEM1/OS9/ERLEC1/DERL2/PSMD8/TUBA1A/TUBB6/ARRB1/SEL1L/CUL1/VCP/PRKAR2A/GNAS/SKP1/PRKACB/PSMC4/PSMA5/PSMC1/TUBB2A/PSMB5/PSMD1/PSMD7/CDC73/PSMB4/CSNK1A1/PSMA3/PSMD11/PSMD4/PSMD2/PSMD14	59
R-HSA-176408	Regulation of APC/C activators between G1/S and early anaphase	38/2093	80/10654	1.62022e-08	1.47462e-07	9.31111e-08	PSMA4/PSMA2/PSME2/PSMB9/PSMB2/PSMA1/PSMB7/PSME1/PSMB6/ANAPC11/PSMB8/PSMB10/PSMA7/PSMB1/RPS27A/UBA52/UBB/UBC/PSMA6/SEM1/PSMD8/UBE2D1/CUL1/UBE2E1/ANAPC16/SKP1/PSMC4/PSMA5/PSMC1/PSMB5/PSMD1/PSMD7/PSMB4/PSMA3/PSMD11/PSMD4/PSMD2/PSMD14	38
R-HSA-983170	Antigen Presentation: Folding, assembly and peptide loading of class I MHC	18/2093	25/10654	2.06453e-08	1.86639e-07	1.17848e-07	TAP1/B2M/HLA-B/HLA-A/HLA-C/HSPA5/PDIA3/CALR/CANX/ERAP2/HLA-F/TAPBP/SEC24A/SEC24D/SEC31A/BCAP31/HLA-E/TAP2	18
R-HSA-1445148	Translocation of SLC2A4 (GLUT4) to the plasma membrane	35/2093	72/10654	2.82709e-08	2.53873e-07	1.60301e-07	TUBA1B/SNAP23/ACTB/ACTG1/TUBA1C/TUBB4B/YWHAZ/YWHAE/CALM2/CALM1/RAB13/RAC1/RAB10/YWHAQ/MYH9/RAB8A/TUBA1A/RALA/VAMP2/RHOQ/TUBB6/YWHAG/PRKAG2/EXOC5/STX4/LNPEP/PRKAG1/TUBB2A/TBC1D4/MYO1C/MYO5A/KIF3B/RAB11A/CALM3/YWHAB	35
R-HSA-8948751	Regulation of PTEN stability and activity	34/2093	69/10654	2.89286e-08	2.58059e-07	1.62944e-07	PSMA4/PSMA2/PSME2/PSMB9/PSMB2/PSMA1/PSMB7/PSME1/PSMB6/PSMB8/PSMB10/PSMA7/PSMB1/RPS27A/UBA52/UBB/UBC/PSMA6/SEM1/PSMD8/TNKS2/XIAP/PSMC4/PSMA5/PSMC1/PSMB5/PSMD1/PSMD7/PSMB4/PSMA3/PSMD11/PSMD4/PSMD2/PSMD14	34
R-HSA-9607240	FLT3 Signaling	90/2093	267/10654	3.05723e-08	2.70927e-07	1.71069e-07	RASGRP3/GRB2/PHB/LAT/PEA15/PSMA4/ACTB/PSMA2/PSME2/FYN/ACTG1/PSMB9/PSMB2/PSMA1/RBX1/PSMB7/PSME1/PPP2R5C/PSMB6/CALM2/PEBP1/PSMB8/PSMB10/PIK3R1/PSMA7/PSMB1/RASGRP1/FLT3LG/ARRB2/CALM1/RPS27A/UBA52/HCK/IQGAP1/UBB/IL2RB/DUSP10/TLN1/IL2RA/RAP1B/UBC/IL2RG/PSMA6/JAK1/SEM1/PSMD8/EREG/DUSP1/DUSP6/RAPGEF2/CSF2RB/CSF2RA/SRC/IL3RA/PPP2CB/GAB2/PIK3CB/ARRB1/MAP2K1/IRS2/DUSP2/JAK2/NRAS/DUSP5/PPP2CA/MAP3K11/LAMTOR…	90
R-HSA-5673001	RAF/MAP kinase cascade	85/2093	249/10654	3.87398e-08	3.41062e-07	2.15354e-07	RASGRP3/GRB2/PHB/LAT/PEA15/PSMA4/ACTB/PSMA2/PSME2/FYN/ACTG1/PSMB9/PSMB2/PSMA1/RBX1/PSMB7/PSME1/PPP2R5C/PSMB6/CALM2/PEBP1/PSMB8/PSMB10/PSMA7/PSMB1/RASGRP1/FLT3LG/ARRB2/CALM1/RPS27A/UBA52/IQGAP1/UBB/IL2RB/DUSP10/TLN1/IL2RA/RAP1B/UBC/IL2RG/PSMA6/JAK1/SEM1/PSMD8/EREG/DUSP1/DUSP6/RAPGEF2/CSF2RB/CSF2RA/SRC/IL3RA/PPP2CB/ARRB1/MAP2K1/IRS2/DUSP2/JAK2/NRAS/DUSP5/PPP2CA/MAP3K11/LAMTOR3/LAMTOR2/APBB1IP/NCAM1…	85
R-HSA-168643	Nucleotide-binding domain, leucine rich repeat containing receptor (NLR) signaling pathways	29/2093	55/10654	4.42478e-08	3.87025e-07	2.44376e-07	AIM2/BCL2/HSP90AB1/UBE2N/TXN/RPS27A/UBA52/TNFAIP3/UBB/NFKB1/RIPK2/UBC/CASP4/NFKB2/PYCARD/BIRC3/NLRP3/P2RX7/IRAK2/IRAK1/APP/BIRC2/CASP1/TAB2/RELA/CASP8/CYLD/BCL2L1/SUGT1	29
R-HSA-450294	MAP kinase activation	32/2093	64/10654	4.73158e-08	4.08554e-07	2.5797e-07	MEF2C/UBE2N/RPS27A/UBA52/UBB/MAP3K8/NFKB1/RIPK2/UBC/DUSP6/FOS/MAP2K3/IRAK2/DUSP3/PPP2CB/IRAK1/JUN/MAP2K1/MAPKAPK2/CUL1/PPP2CA/RPS6KA1/MAPKAPK3/TNIP2/MEF2A/TAB2/RPS6KA3/SKP1/DUSP4/MAPK1/MAP2K7/MAPK8	32
R-HSA-4608870	Asymmetric localization of PCP proteins	32/2093	64/10654	4.73158e-08	4.08554e-07	2.5797e-07	PSMA4/PSMA2/PSME2/PSMB9/PSMB2/PSMA1/PSMB7/PSME1/PSMB6/PSMB8/PSMB10/PSMA7/PSMB1/RPS27A/UBA52/UBB/UBC/PSMA6/SEM1/PSMD8/PSMC4/PSMA5/PSMC1/PSMB5/PSMD1/PSMD7/PSMB4/PSMA3/PSMD11/PSMD4/PSMD2/PSMD14	32
R-HSA-174143	APC/C-mediated degradation of cell cycle proteins	39/2093	86/10654	5.20224e-08	4.40718e-07	2.78279e-07	PSMA4/PSMA2/PSME2/PTTG1/PSMB9/PSMB2/PSMA1/PSMB7/PSME1/PSMB6/ANAPC11/PSMB8/PSMB10/PSMA7/PSMB1/RPS27A/UBA52/UBB/UBC/PSMA6/SEM1/PSMD8/UBE2D1/CUL1/UBE2E1/ANAPC16/SKP1/PSMC4/PSMA5/PSMC1/PSMB5/PSMD1/PSMD7/PSMB4/PSMA3/PSMD11/PSMD4/PSMD2/PSMD14	39
R-HSA-453276	Regulation of mitotic cell cycle	39/2093	86/10654	5.20224e-08	4.40718e-07	2.78279e-07	PSMA4/PSMA2/PSME2/PTTG1/PSMB9/PSMB2/PSMA1/PSMB7/PSME1/PSMB6/ANAPC11/PSMB8/PSMB10/PSMA7/PSMB1/RPS27A/UBA52/UBB/UBC/PSMA6/SEM1/PSMD8/UBE2D1/CUL1/UBE2E1/ANAPC16/SKP1/PSMC4/PSMA5/PSMC1/PSMB5/PSMD1/PSMD7/PSMB4/PSMA3/PSMD11/PSMD4/PSMD2/PSMD14	39
R-HSA-5628897	TP53 Regulates Metabolic Genes	39/2093	86/10654	5.20224e-08	4.40718e-07	2.78279e-07	COX2/LAMTOR5/COX20/COX3/PRDX1/COX5A/COX6A1/YWHAZ/CYCS/YWHAE/COX16/LAMTOR1/COX7B/COX6C/NDUFA4/COX5B/TXN/COX1/COX7C/COX4I1/SESN3/COX8A/YWHAQ/PRDX5/DDIT4/RHEB/RRAGC/YWHAG/G6PD/GLS/TXNRD1/PRKAG2/LAMTOR3/PRDX2/LAMTOR2/TNRC6B/LAMTOR4/PRKAG1/YWHAB	39
R-HSA-69052	Switching of origins to a post-replicative state	40/2093	90/10654	6.99565e-08	5.88946e-07	3.71874e-07	MCM5/PSMA4/PSMA2/PSME2/PSMB9/PSMB2/PSMA1/RBX1/PSMB7/PSME1/PSMB6/ANAPC11/PSMB8/PSMB10/PSMA7/PSMB1/RPS27A/UBA52/UBB/UBC/PSMA6/SEM1/PSMD8/UBE2D1/CUL1/UBE2E1/ANAPC16/SKP1/PSMC4/PSMA5/PSMC1/PSMB5/PSMD1/PSMD7/PSMB4/PSMA3/PSMD11/PSMD4/PSMD2/PSMD14	40
R-HSA-68867	Assembly of the pre-replicative complex	33/2093	68/10654	7.39203e-08	6.18452e-07	3.90504e-07	MCM5/PSMA4/PSMA2/PSME2/PSMB9/PSMB2/PSMA1/PSMB7/PSME1/PSMB6/PSMB8/PSMB10/PSMA7/PSMB1/RPS27A/UBA52/UBB/UBC/PSMA6/SEM1/PSMD8/PSMC4/PSMA5/PSMC1/PSMB5/PSMD1/PSMD7/PSMB4/PSMA3/PSMD11/PSMD4/PSMD2/PSMD14	33
R-HSA-202427	Phosphorylation of CD3 and TCR zeta chains	16/2093	22/10654	1.03948e-07	8.64308e-07	5.45744e-07	HLA-DRA/HLA-DPA1/HLA-DPB1/HLA-DRB1/HLA-DQB1/HLA-DQA1/HLA-DQA2/HLA-DRB5/CD3D/CD3E/PTPRC/CD247/LCK/CD3G/PTPN22/PAG1	16
R-HSA-512988	Interleukin-3, Interleukin-5 and GM-CSF signaling	26/2093	48/10654	1.07768e-07	8.90574e-07	5.62328e-07	BLNK/SYK/LYN/GRB2/PTPN6/FYN/YWHAZ/PIK3R1/RPS27A/UBA52/HCK/UBB/IL2RB/IL2RA/UBC/RAPGEF1/IL2RG/JAK1/CSF2RB/CSF2RA/IL3RA/GAB2/PIK3CB/JAK2/VAV1/STAT5A	26
R-HSA-76002	Platelet activation, signaling and aggregation	87/2093	262/10654	1.11904e-07	9.19112e-07	5.80348e-07	GNG7/SYK/LYN/PRKCB/TMSB4X/FAM3C/GRB2/LCK/PTPN1/LAT/TAGLN2/PTPN6/FYN/PPIA/YWHAZ/CFL1/GNG5/CALM2/CTSW/PRKCH/ALDOA/FCER1G/SRGN/RAC2/PIK3R1/RASGRP1/LCP2/DGKA/ARRB2/TIMP1/CALM1/PLEK/CD63/ANXA5/GNG2/PFN1/HSPA5/ACTN4/PSAP/TLN1/SOD1/WDR1/RAC1/MANF/FAM49B/RAP1B/GNAI2/RHOA/GNB1/LGALS3BP/CAP1/STXBP2/CDC42/VTI1B/RHOG/SERPINA1/CD9/SERPING1/CD36/VEGFA/SRC/LHFPL2/GNB4/APLP2/GNA15/MGLL/GNAQ/PIK3CB/LAMP2/FLNA/ARR…	87
R-HSA-5632684	Hedgehog 'on' state	38/2093	85/10654	1.22531e-07	1.0003e-06	6.3161e-07	PSMA4/PSMA2/PSME2/PSMB9/PSMB2/PSMA1/RBX1/PSMB7/PSME1/PSMB6/PSMB8/PSMB10/PSMA7/PSMB1/ARRB2/RPS27A/UBA52/UBB/UBC/PSMA6/NUMB/SEM1/PSMD8/ARRB1/PSMC4/PSMA5/PSMC1/PSMB5/PSMD1/PSMD7/CDC73/PSMB4/CSNK1A1/PSMA3/PSMD11/PSMD4/PSMD2/PSMD14	38
R-HSA-2029481	FCGR activation	11/2093	12/10654	1.62177e-07	1.31598e-06	8.30937e-07	SYK/LYN/CD247/CD3G/FYN/FCGR3A/HCK/FCGR2A/FCGR1A/FGR/SRC	11
R-HSA-73887	Death Receptor Signalling	54/2093	141/10654	1.90884e-07	1.53964e-06	9.72166e-07	FGD2/YWHAE/FGD3/RPS27A/RACK1/UBA52/TNFAIP3/UBB/FASLG/NFKB1/NFKBIA/CFLAR/TNF/RIPK2/RAC1/RTN4/BEX3/TRAF1/UBC/ADAM17/RHOA/ARHGDIA/PSENEN/TAX1BP1/AKAP13/TNFSF10/BIRC3/ARHGEF1/ARHGEF10L/IRAK1/NSMAF/SPPL2A/PSEN1/VAV1/SQSTM1/BIRC2/ABR/GNA13/PREX1/NCSTN/TAB2/MYD88/ARHGEF2/RELA/XIAP/CASP8/RBCK1/ARHGEF3/CYLD/BCL2L11/MAPK8/CASP3/HDAC2/FAS	54
R-HSA-382556	ABC-family proteins mediated transport	43/2093	103/10654	2.04511e-07	1.63974e-06	1.03537e-06	PSMA4/PSMA2/PSME2/PSMB9/PSMB2/PSMA1/PSMB7/PSME1/PSMB6/EIF2S2/PSMB8/PSMB10/PSMA7/PSMB1/RPS27A/UBA52/UBB/UBC/PSMA6/SEM1/OS9/ERLEC1/DERL2/PSMD8/ABCG1/SEL1L/VCP/EIF2S3/RNF5/DERL1/PSMC4/PSMA5/ABCF1/PSMC1/PSMB5/PSMD1/PSMD7/PSMB4/PSMA3/PSMD11/PSMD4/PSMD2/PSMD14	43
R-HSA-1169410	Antiviral mechanism by IFN-stimulated genes	36/2093	80/10654	2.14163e-07	1.70697e-06	1.07782e-06	UBE2N/UBE2L6/EIF4E/EIF4G2/EIF4A1/RPS27A/UBA52/UBB/EIF4A2/UBC/JAK1/OASL/ISG15/IRF3/FLNA/NUP58/NUP62/NUP214/EIF4E2/UBE2E1/KPNA4/TRIM25/MX1/EIF2AK2/IFIT1/TPR/MX2/USP18/OAS3/OAS1/OAS2/NUP98/FLNB/EIF4G1/PPM1B/STAT1	36
R-HSA-389948	PD-1 signaling	16/2093	23/10654	2.7906e-07	2.20553e-06	1.39262e-06	HLA-DRA/HLA-DPA1/HLA-DPB1/HLA-DRB1/HLA-DQB1/HLA-DQA1/HLA-DQA2/HLA-DRB5/CD3D/CD3E/CD247/LCK/CD3G/PTPN6/CD274/PDCD1LG2	16
R-HSA-451927	Interleukin-2 family signaling	24/2093	44/10654	2.79989e-07	2.20553e-06	1.39262e-06	SYK/GRB2/LCK/PTPN6/LGALS9/PIK3R1/STAT4/HAVCR2/IL2RB/IL2RA/PTK2B/IL2RG/JAK1/STAT3/CSF2RB/CSF2RA/IL3RA/GAB2/PIK3CB/IL15RA/JAK2/IL15/STAT5A/STAT1	24
R-HSA-199992	trans-Golgi Network Vesicle Budding	33/2093	72/10654	4.03738e-07	3.14356e-06	1.98491e-06	TPD52/SNX2/SNAP23/AP3B1/AP3S1/FTH1/VAMP8/TFRC/BLOC1S1/ARF1/FTL/GOLGB1/VAMP2/CTSZ/GNS/CPD/AP1S2/PICALM/SNX9/ARRB1/IGF2R/CLTC/APP/M6PR/CLTA/HSPA8/CHMP2A/STX4/BLOC1S6/RAB5C/DTNBP1/CLINT1/NAPA	33
R-HSA-448424	Interleukin-17 signaling	33/2093	72/10654	4.03738e-07	3.14356e-06	1.98491e-06	MEF2C/UBE2N/RPS27A/UBA52/UBB/MAP3K8/NFKB1/RIPK2/UBC/DUSP6/FOS/MAP2K3/IRAK2/DUSP3/PPP2CB/IL17RA/IRAK1/JUN/MAP2K1/MAPKAPK2/CUL1/PPP2CA/RPS6KA1/MAPKAPK3/TNIP2/MEF2A/TAB2/RPS6KA3/SKP1/DUSP4/MAPK1/MAP2K7/MAPK8	33
R-HSA-9612973	Autophagy	47/2093	119/10654	4.0935e-07	3.16894e-06	2.00094e-06	LAMTOR5/HSP90AB1/DYNLL1/TOMM22/TOMM7/TOMM5/VDAC1/LAMTOR1/PARK7/RPS27A/EEF1A1/UBA52/UBB/GABARAPL1/UBC/TOMM20/VIM/PLIN2/GABARAP/CHMP4A/RNASE1/SRC/LAMP2/ATG7/CHMP4B/ATG3/RHEB/RRAGC/MAP1LC3B/SQSTM1/HSPA8/WDR45B/PLIN3/CHMP2A/PRKAG2/LAMTOR3/LAMTOR2/RB1CC1/GABARAPL2/LAMTOR4/VPS37B/ATG12/PRKAG1/ATG101/UVRAG/TSG101/HSP90AA1	47
R-HSA-69275	G2/M Transition	68/2093	196/10654	4.46669e-07	3.43808e-06	2.17088e-06	TUBA1B/HSP90AB1/PSMA4/PSMA2/PSME2/DYNLL1/PSMB9/TUBA1C/PSMB2/TUBB4B/PSMA1/RBX1/PSMB7/YWHAE/PSME1/TUBB/PSMB6/OFD1/PSMB8/PSMB10/PSMA7/PSMB1/RPS27A/UBA52/UBB/CDKN1A/UBC/PSMA6/SEM1/PSMD8/PAFAH1B1/RAB8A/PPP1R12A/TUBA1A/TUBB6/PPP2CB/PHLDA1/YWHAG/PPP1CB/CUL1/PPP2CA/SDCCAG8/DYNC1I2/OPTN/SKP1/AKAP9/MNAT1/PSMC4/CSNK1D/PSMA5/RBBP4/PSMC1/TUBB2A/CEP135/PSMB5/MAPRE1/PSMD1/SSNA1/PSMD7/NDE1/PSMB4/PSMA3/PSMD11/PSM…	68
R-HSA-2132295	MHC class II antigen presentation	48/2093	123/10654	4.71366e-07	3.60756e-06	2.27789e-06	CD74/HLA-DRA/HLA-DPA1/HLA-DPB1/HLA-DRB1/HLA-DQB1/HLA-DQA1/HLA-DQA2/HLA-DMB/CTSH/HLA-DRB5/HLA-DOA/HLA-DOB/TUBA1B/IFI30/DYNLL1/TUBA1C/TUBB4B/CAPZA1/KIF2A/CTSC/CTSD/CTSS/ARF1/CTSB/CANX/AP2S1/RAB7A/TUBA1A/LAG3/CTSL/TUBB6/AP1S2/CLTC/SEC24A/CTSA/SEC24D/CLTA/KIF5B/CAPZA2/SEC31A/DYNC1LI1/DYNC1I2/TUBB2A/LGMN/KIF3B/AP2M1/CAPZB	48
R-HSA-202430	Translocation of ZAP-70 to Immunological synapse	14/2093	19/10654	5.24297e-07	3.98999e-06	2.51937e-06	HLA-DRA/HLA-DPA1/HLA-DPB1/HLA-DRB1/HLA-DQB1/HLA-DQA1/HLA-DQA2/HLA-DRB5/CD3D/CD3E/CD247/LCK/CD3G/PTPN22	14
R-HSA-453274	Mitotic G2-G2/M phases	68/2093	198/10654	6.83783e-07	5.17447e-06	3.26728e-06	TUBA1B/HSP90AB1/PSMA4/PSMA2/PSME2/DYNLL1/PSMB9/TUBA1C/PSMB2/TUBB4B/PSMA1/RBX1/PSMB7/YWHAE/PSME1/TUBB/PSMB6/OFD1/PSMB8/PSMB10/PSMA7/PSMB1/RPS27A/UBA52/UBB/CDKN1A/UBC/PSMA6/SEM1/PSMD8/PAFAH1B1/RAB8A/PPP1R12A/TUBA1A/TUBB6/PPP2CB/PHLDA1/YWHAG/PPP1CB/CUL1/PPP2CA/SDCCAG8/DYNC1I2/OPTN/SKP1/AKAP9/MNAT1/PSMC4/CSNK1D/PSMA5/RBBP4/PSMC1/TUBB2A/CEP135/PSMB5/MAPRE1/PSMD1/SSNA1/PSMD7/NDE1/PSMB4/PSMA3/PSMD11/PSM…	68
R-HSA-2871796	FCERI mediated MAPK activation	19/2093	32/10654	8.53719e-07	6.42436e-06	4.05648e-06	SYK/LYN/GRB2/LAT/FCER1G/GRAP2/LCP2/RAC1/FOS/JUN/PAK1/NRAS/VAV1/PAK2/MAP3K1/MAPK1/MAP2K7/MAPK8/KRAS	19
R-HSA-6802957	Oncogenic MAPK signaling	32/2093	71/10654	9.60852e-07	7.19038e-06	4.54017e-06	PHB/ACTB/ACTG1/AP3B1/CALM2/PEBP1/ARRB2/CALM1/IQGAP1/TLN1/RAP1B/QKI/MPRIP/LMNA/AGTRAP/SRC/KDM7A/ATG7/ARRB1/MAP2K1/JAK2/NRAS/PAPSS1/MAP3K11/AKAP9/APBB1IP/MAPK1/BCL2L11/KRAS/FXR1/CALM3/YWHAB	32
R-HSA-157118	Signaling by NOTCH	77/2093	235/10654	1.07819e-06	8.02386e-06	5.06644e-06	PSMA4/PSMA2/PSME2/PSMB9/PSMB2/YWHAZ/PSMA1/RBX1/PSMB7/YBX1/PSME1/PSMB6/H2BC12/PSMB8/PSMB10/PSMA7/PSMB1/GZMB/H3-3A/H2AZ1/ARRB2/IKZF1/RPS27A/UBA52/H3-3B/UBB/MYC/UBC/ADAM17/HIF1A/FURIN/PSMA6/NUMB/SEM1/PSENEN/TMED2/PSMD8/RBPJ/PLXND1/B4GALT1/NOTCH2/RUNX1/ATP2A2/ARRB1/JUN/PSEN1/DTX2/ADAM10/SEL1L/NCOR2/CUL1/H2AJ/NCSTN/TNRC6B/MAML2/H4C3/SKP1/MFNG/TLE4/PSMC4/PSMA5/PSMC1/DLL4/POGLUT1/PSMB5/TLE3/H2AZ2/PSMD1/…	77
R-HSA-1428517	The citric acid (TCA) cycle and respiratory electron transport	61/2093	174/10654	1.15959e-06	8.58225e-06	5.41903e-06	ND4/COX2/ATP5MC1/COX20/COX3/ATP6/ND1/ND5/COX5A/ACO2/ND2/UQCRH/LDHB/UQCRB/COX6A1/ATP5F1B/UCP2/ND3/NDUFAB1/CYCS/COX16/ATP5MC3/VDAC1/UQCRQ/NDUFB2/NDUFB7/NDUFS6/CYTB/ATP5PF/NDUFA13/ATP5MF/COX7B/COX6C/NDUFA4/COX5B/COX1/COX7C/SLC16A3/COX4I1/LDHA/NDUFV2/BSG/COX8A/NDUFA1/UQCR11/UQCR10/NDUFA2/RXRA/ATP5F1E/ATP5MC2/ATP5MG/NDUFV3/ATP8/ATP5F1A/ATP5PO/NDUFS5/ATP5PD/NDUFA6/NDUFS4/NDUFA9/NDUFA11	61
R-HSA-622312	Inflammasomes	14/2093	20/10654	1.43047e-06	1.05292e-05	6.64836e-06	AIM2/BCL2/HSP90AB1/TXN/NFKB1/NFKB2/PYCARD/NLRP3/P2RX7/APP/CASP1/RELA/BCL2L1/SUGT1	14
R-HSA-4420097	VEGFA-VEGFR2 Pathway	40/2093	99/10654	1.48435e-06	1.08664e-05	6.86129e-06	NCF4/PRKCB/ACTB/FYN/ACTG1/NCF1/CALM2/PIK3R1/BRK1/SH2D2A/CALM1/CYBB/RAC1/PTK2B/RHOA/CYBA/ABI1/CDC42/NCF2/VEGFA/SRC/SPHK1/CTNNA1/CTNND1/PIK3CB/ITGAV/AHCYL1/CTNNB1/PAK1/NRAS/MAPKAPK2/VAV1/PAK2/ITPR2/MAPKAPK3/PRKACB/KRAS/CALM3/WASF2/HSP90AA1	40
R-HSA-1222556	ROS and RNS production in phagocytes	20/2093	36/10654	1.88682e-06	1.36643e-05	8.62792e-06	HVCN1/NCF4/NCF1/ATP6V0E1/ATP6V0D1/RAC2/CYBB/ATP6V0B/ATP6V1F/CYBA/NCF2/SLC11A1/ATP6V1B2/ATP6V1A/ATP6V0A1/TCIRG1/ATP6V1C1/ATP6V1D/ATP6V1E1/ATP6V1G1	20
R-HSA-5663213	RHO GTPases Activate WASPs and WAVEs	20/2093	36/10654	1.88682e-06	1.36643e-05	8.62792e-06	BTK/GRB2/ACTB/ACTG1/ARPC3/ARPC4/ARPC1B/ARPC5/ARPC2/BRK1/RAC1/ACTR2/ABI1/CDC42/ACTR3/WIPF1/WIPF2/ARPC1A/MAPK1/WASF2	20
R-HSA-8878166	Transcriptional regulation by RUNX2	46/2093	121/10654	1.92273e-06	1.38498e-05	8.74509e-06	PSMA4/PSMA2/PSME2/PSMB9/PSMB2/CDK4/PSMA1/RBX1/PSMB7/PSME1/PSMB6/PSMB8/PSMB10/PSMA7/PSMB1/RPS27A/UBA52/UBB/CDKN1A/LGALS3/UBC/PSMA6/SEM1/PSMD8/BAX/SRC/RUNX1/RB1/CUL1/ITGA5/SKP1/MAPK1/PSMC4/PSMA5/PSMC1/RUNX2/PSMB5/PSMD1/PSMD7/PSMB4/PSMA3/PSMD11/PSMD4/PSMD2/PSMD14/STAT1	46
R-HSA-163210	Formation of ATP by chemiosmotic coupling	13/2093	18/10654	1.98742e-06	1.42397e-05	8.99125e-06	ATP5MC1/ATP6/ATP5F1B/ATP5MC3/ATP5PF/ATP5MF/ATP5F1E/ATP5MC2/ATP5MG/ATP8/ATP5F1A/ATP5PO/ATP5PD	13
R-HSA-611105	Respiratory electron transport	40/2093	100/10654	2.01006e-06	1.43257e-05	9.04555e-06	ND4/COX2/COX20/COX3/ND1/ND5/COX5A/ND2/UQCRH/UQCRB/COX6A1/ND3/NDUFAB1/CYCS/COX16/UQCRQ/NDUFB2/NDUFB7/NDUFS6/CYTB/NDUFA13/COX7B/COX6C/NDUFA4/COX5B/COX1/COX7C/COX4I1/NDUFV2/COX8A/NDUFA1/UQCR11/UQCR10/NDUFA2/NDUFV3/NDUFS5/NDUFA6/NDUFS4/NDUFA9/NDUFA11	40
R-HSA-6807070	PTEN Regulation	51/2093	140/10654	2.40025e-06	1.70165e-05	1.07446e-05	LAMTOR5/PSMA4/PSMA2/PSME2/PSMB9/PSMB2/PSMA1/PSMB7/PSME1/LAMTOR1/PSMB6/PSMB8/PSMB10/PSMA7/PSMB1/RPS27A/UBA52/UBB/UBC/PSMA6/SEM1/PSMD8/EGR1/RHEB/JUN/RRAGC/TNKS2/LAMTOR3/LAMTOR2/TNRC6B/XIAP/LAMTOR4/MAPK1/PSMC4/PSMA5/RBBP4/CHD4/PSMC1/EZH2/PSMB5/CBX6/PSMD1/PSMD7/HDAC2/PSMB4/PSMA3/PML/PSMD11/PSMD4/PSMD2/PSMD14	51
R-HSA-6802952	Signaling by BRAF and RAF fusions	30/2093	67/10654	2.46995e-06	1.7419e-05	1.09988e-05	ACTB/ACTG1/AP3B1/CALM2/PEBP1/ARRB2/CALM1/IQGAP1/TLN1/RAP1B/QKI/MPRIP/LMNA/AGTRAP/SRC/KDM7A/ATG7/ARRB1/MAP2K1/JAK2/NRAS/PAPSS1/AKAP9/APBB1IP/MAPK1/BCL2L11/KRAS/FXR1/CALM3/YWHAB	30
R-HSA-68882	Mitotic Anaphase	67/2093	201/10654	2.73165e-06	1.91642e-05	1.21007e-05	TUBA1B/VRK2/PSMA4/PSMA2/PSME2/PTTG1/DYNLL1/PSMB9/TUBA1C/BANF1/PSMB2/TUBB4B/PSMA1/PSMB7/PSME1/PPP2R5C/PSMB6/ANAPC11/PSMB8/PSMB10/PSMA7/PSMB1/KIF2A/RPS27A/RPS27/UBA52/UBB/UBC/PSMA6/SEM1/PSMD8/PAFAH1B1/TUBA1A/LMNA/TUBB6/UBE2D1/PPP2CB/ANKLE2/PPP2CA/TAOK1/UBE2E1/DYNC1LI1/DYNC1I2/ANAPC16/MAD1L1/PSMC4/PSMA5/STAG2/PSMC1/TUBB2A/LMNB1/NUP98/PSMB5/MAPRE1/EMD/PSMD1/PSMD7/NDE1/PSMB4/PSMA3/CLIP1/RAD21/PSMD11/P…	67
R-HSA-69239	Synthesis of DNA	45/2093	119/10654	2.93087e-06	2.04554e-05	1.2916e-05	MCM5/PSMA4/PSMA2/PSME2/PSMB9/POLD2/RPA3/PSMB2/POLD4/PSMA1/RBX1/PSMB7/PSME1/PSMB6/ANAPC11/PSMB8/PSMB10/PSMA7/PSMB1/RPS27A/UBA52/UBB/UBC/PSMA6/SEM1/PSMD8/UBE2D1/CUL1/UBE2E1/ANAPC16/SKP1/RFC1/RPA2/PSMC4/PSMA5/PSMC1/PSMB5/PSMD1/PSMD7/PSMB4/PSMA3/PSMD11/PSMD4/PSMD2/PSMD14	45
R-HSA-936440	Negative regulators of DDX58/IFIH1 signaling	19/2093	34/10654	3.03817e-06	2.10949e-05	1.33198e-05	UBE2L6/RPS27A/UBA52/TNFAIP3/UBB/UBC/TAX1BP1/ISG15/IRF3/UBE2D1/TBK1/TRIM25/ATG12/UBE2D3/CYLD/IFIH1/TRAF3/UBE2K/PCBP2	19
R-HSA-2555396	Mitotic Metaphase and Anaphase	67/2093	202/10654	3.31642e-06	2.2792e-05	1.43914e-05	TUBA1B/VRK2/PSMA4/PSMA2/PSME2/PTTG1/DYNLL1/PSMB9/TUBA1C/BANF1/PSMB2/TUBB4B/PSMA1/PSMB7/PSME1/PPP2R5C/PSMB6/ANAPC11/PSMB8/PSMB10/PSMA7/PSMB1/KIF2A/RPS27A/RPS27/UBA52/UBB/UBC/PSMA6/SEM1/PSMD8/PAFAH1B1/TUBA1A/LMNA/TUBB6/UBE2D1/PPP2CB/ANKLE2/PPP2CA/TAOK1/UBE2E1/DYNC1LI1/DYNC1I2/ANAPC16/MAD1L1/PSMC4/PSMA5/STAG2/PSMC1/TUBB2A/LMNB1/NUP98/PSMB5/MAPRE1/EMD/PSMD1/PSMD7/NDE1/PSMB4/PSMA3/CLIP1/RAD21/PSMD11/P…	67
R-HSA-877312	Regulation of IFNG signaling	11/2093	14/10654	3.31643e-06	2.2792e-05	1.43914e-05	PTPN1/PTPN6/IFNG/JAK1/PTPN2/SUMO1/SOCS3/IFNGR2/IFNGR1/JAK2/STAT1	11
R-HSA-3299685	Detoxification of Reactive Oxygen Species	20/2093	37/10654	3.35046e-06	2.2909e-05	1.44652e-05	NCF4/PRDX1/NCF1/PRDX3/CYCS/GSTP1/TXN/CYBB/ATOX1/P4HB/SOD1/SOD2/ERO1A/CYBA/PRDX5/GPX1/NCF2/TXNRD1/PRDX2/PRDX6	20
R-HSA-453279	Mitotic G1-G1/S phases	53/2093	149/10654	3.50534e-06	2.38469e-05	1.50575e-05	MCM5/LYN/CKS1B/PSMA4/PSMA2/PSME2/PSMB9/RPA3/PSMB2/CDK4/PSMA1/PSMB7/PSME1/PSMB6/CCND3/PSMB8/PSMB10/PSMA7/PSMB1/RPS27A/UBA52/UBB/CDKN1A/MYC/UBC/PSMA6/SEM1/CCND2/PSMD8/RBL2/SRC/PPP2CB/RB1/JAK2/CUL1/PPP2CA/SKP1/RPA2/MNAT1/PSMC4/PSMA5/RBBP4/PSMC1/CDK6/PSMB5/PSMD1/PSMD7/PSMB4/PSMA3/PSMD11/PSMD4/PSMD2/PSMD14	53
R-HSA-1632852	Macroautophagy	38/2093	95/10654	3.59805e-06	2.43546e-05	1.53781e-05	LAMTOR5/DYNLL1/TOMM22/TOMM7/TOMM5/VDAC1/LAMTOR1/RPS27A/UBA52/UBB/GABARAPL1/UBC/TOMM20/PLIN2/GABARAP/CHMP4A/SRC/ATG7/CHMP4B/ATG3/RHEB/RRAGC/MAP1LC3B/SQSTM1/HSPA8/WDR45B/PLIN3/CHMP2A/PRKAG2/LAMTOR3/LAMTOR2/RB1CC1/GABARAPL2/LAMTOR4/ATG12/PRKAG1/ATG101/UVRAG	38
R-HSA-389359	CD28 dependent Vav1 pathway	10/2093	12/10654	3.75488e-06	2.52891e-05	1.59681e-05	CD86/GRB2/LCK/FYN/RAC1/CDC42/CD80/PAK1/VAV1/PAK2	10
R-HSA-69002	DNA Replication Pre-Initiation	35/2093	85/10654	3.97652e-06	2.66486e-05	1.68265e-05	MCM5/PSMA4/PSMA2/PSME2/PSMB9/RPA3/PSMB2/PSMA1/PSMB7/PSME1/PSMB6/PSMB8/PSMB10/PSMA7/PSMB1/RPS27A/UBA52/UBB/UBC/PSMA6/SEM1/PSMD8/RPA2/PSMC4/PSMA5/PSMC1/PSMB5/PSMD1/PSMD7/PSMB4/PSMA3/PSMD11/PSMD4/PSMD2/PSMD14	35
R-HSA-1169408	ISG15 antiviral mechanism	31/2093	72/10654	4.64087e-06	3.09468e-05	1.95405e-05	UBE2N/UBE2L6/EIF4E/EIF4G2/EIF4A1/RPS27A/UBA52/UBB/EIF4A2/UBC/JAK1/ISG15/IRF3/NUP58/NUP62/NUP214/EIF4E2/UBE2E1/KPNA4/TRIM25/MX1/EIF2AK2/IFIT1/TPR/MX2/USP18/NUP98/FLNB/EIF4G1/PPM1B/STAT1	31
R-HSA-5626467	RHO GTPases activate IQGAPs	18/2093	32/10654	4.89007e-06	3.24479e-05	2.04883e-05	TUBA1B/ACTB/ACTG1/TUBA1C/TUBB4B/CALM2/CALM1/IQGAP1/RAC1/CDC42/TUBA1A/TUBB6/CTNNA1/CTNNB1/IQGAP2/TUBB2A/CLIP1/CALM3	18
R-HSA-432722	Golgi Associated Vesicle Biogenesis	26/2093	56/10654	5.04883e-06	3.33371e-05	2.10498e-05	TPD52/SNX2/AP3B1/AP3S1/FTH1/VAMP8/TFRC/BLOC1S1/ARF1/FTL/GOLGB1/VAMP2/CPD/AP1S2/PICALM/SNX9/ARRB1/IGF2R/CLTC/CLTA/HSPA8/BLOC1S6/RAB5C/DTNBP1/CLINT1/NAPA	26
R-HSA-532668	N-glycan trimming in the ER and Calnexin/Calreticulin cycle	19/2093	35/10654	5.42527e-06	3.55921e-05	2.24737e-05	NGLY1/RPS27A/UBA52/UBB/PDIA3/CALR/UBC/CANX/OS9/DERL2/SEL1L/EDEM1/RAD23B/GANAB/VCP/UBXN1/RNF5/DERL1/PSMC1	19
R-HSA-194138	Signaling by VEGF	41/2093	107/10654	5.44319e-06	3.55921e-05	2.24737e-05	NCF4/PRKCB/ACTB/FYN/ACTG1/NCF1/CALM2/PIK3R1/BRK1/SH2D2A/CALM1/CYBB/RAC1/PTK2B/RHOA/CYBA/ABI1/CDC42/NCF2/NRP2/VEGFA/SRC/SPHK1/CTNNA1/CTNND1/PIK3CB/ITGAV/AHCYL1/CTNNB1/PAK1/NRAS/MAPKAPK2/VAV1/PAK2/ITPR2/MAPKAPK3/PRKACB/KRAS/CALM3/WASF2/HSP90AA1	41
R-HSA-381119	Unfolded Protein Response (UPR)	37/2093	94/10654	7.49363e-06	4.87629e-05	3.079e-05	HERPUD1/PDIA6/YIF1A/CXXC1/ATP6V0D1/EIF2S2/ATF4/HSPA5/DNAJC3/MYDGF/TLN1/CXCL8/HYOU1/CALR/DNAJB11/XBP1/HSP90B1/TPP1/DDIT3/DNAJB9/CCL2/LMNA/CEBPB/ATF3/HDGF/EDEM1/ZBTB17/SEC31A/SSR1/DCP2/EIF2S3/EXOSC8/SRPRA/CREB3/CEBPG/ACADVL/ADD1	37
R-HSA-72163	mRNA Splicing - Major Pathway	61/2093	183/10654	7.53966e-06	4.88265e-05	3.08302e-05	SNRPB/LSM7/SRSF3/SNRPD1/SNRPG/SNRPC/SNRPE/YBX1/HNRNPA2B1/LSM6/HNRNPR/LSM3/RNPS1/HNRNPM/SNU13/SNRPF/RBMX/SF3B6/HNRNPA3/HNRNPA1/PCBP1/POLR2K/BUD31/SF3B5/POLR2L/HNRNPU/DDX5/SNRPD2/SRSF9/HSPA8/RBM17/SRSF5/PTBP1/CTNNBL1/HNRNPH2/HNRNPD/POLR2E/PAPOLA/SF1/SRSF7/SYF2/SRRM1/FUS/LSM5/LSM8/POLR2C/POLR2H/MAGOHB/SF3B2/CD2BP2/PRPF38A/HNRNPL/WBP4/SRSF4/PABPN1/SMNDC1/SF3A1/U2AF1/HNRNPH1/HNRNPC/PCBP2	61
R-HSA-2424491	DAP12 signaling	17/2093	30/10654	7.86646e-06	5.05086e-05	3.18922e-05	BTK/SYK/GRB2/LCK/LAT/FYN/TYROBP/KLRD1/PIK3R1/GRAP2/LCP2/B2M/RAC1/PIK3CB/NRAS/HLA-E/KRAS	17
R-HSA-912631	Regulation of signaling by CBL	14/2093	22/10654	7.91188e-06	5.05086e-05	3.18922e-05	BLNK/SYK/LYN/GRB2/FYN/PIK3R1/RPS27A/UBA52/HCK/UBB/UBC/RAPGEF1/PIK3CB/VAV1	14
R-HSA-9613829	Chaperone Mediated Autophagy	14/2093	22/10654	7.91188e-06	5.05086e-05	3.18922e-05	HSP90AB1/PARK7/RPS27A/EEF1A1/UBA52/UBB/UBC/VIM/PLIN2/RNASE1/LAMP2/HSPA8/PLIN3/HSP90AA1	14
R-HSA-69242	S Phase	55/2093	161/10654	9.2913e-06	5.90348e-05	3.72759e-05	MCM5/CKS1B/PSMA4/PSMA2/PSME2/PSMB9/POLD2/RPA3/PSMB2/CDK4/POLD4/PSMA1/RBX1/PSMB7/PSME1/PSMB6/ANAPC11/PSMB8/PSMB10/PSMA7/PSMB1/RPS27A/UBA52/UBB/CDKN1A/MYC/UBC/PSMA6/SEM1/PSMD8/RBL2/UBE2D1/RB1/CUL1/UBE2E1/ANAPC16/SKP1/RFC1/RPA2/MNAT1/PSMC4/PSMA5/RBBP4/STAG2/PSMC1/PSMB5/PSMD1/PSMD7/PSMB4/PSMA3/RAD21/PSMD11/PSMD4/PSMD2/PSMD14	55
R-HSA-69206	G1/S Transition	47/2093	131/10654	9.45315e-06	5.97812e-05	3.77472e-05	MCM5/CKS1B/PSMA4/PSMA2/PSME2/PSMB9/RPA3/PSMB2/CDK4/PSMA1/PSMB7/PSME1/PSMB6/PSMB8/PSMB10/PSMA7/PSMB1/RPS27A/UBA52/UBB/CDKN1A/MYC/UBC/PSMA6/SEM1/PSMD8/RBL2/PPP2CB/RB1/CUL1/PPP2CA/SKP1/RPA2/MNAT1/PSMC4/PSMA5/RBBP4/PSMC1/PSMB5/PSMD1/PSMD7/PSMB4/PSMA3/PSMD11/PSMD4/PSMD2/PSMD14	47
R-HSA-8856828	Clathrin-mediated endocytosis	51/2093	146/10654	9.59314e-06	6.0383e-05	3.81272e-05	CD3D/IL7R/GRB2/CD3G/ACTB/ACTG1/ARPC3/ARPC4/FNBP1/AAK1/ARPC5/ARPC2/ARRB2/RPS27A/UBA52/UBB/VAMP8/TFRC/ARF6/UBC/ACTR2/EPS15/AP2S1/ACTR3/VAMP2/EREG/DAB2/SCARB2/TRIP10/PICALM/HIP1/SNX9/ARRB1/IGF2R/CLTC/GRK3/SNX18/VAMP3/M6PR/CLTA/HSPA8/UBQLN1/RAB5C/ARPC1A/ITSN2/RAB5A/BIN1/COPS6/RAB5B/SH3KBP1/AP2M1	51
R-HSA-844456	The NLRP3 inflammasome	11/2093	15/10654	1.02164e-05	6.40072e-05	4.04156e-05	HSP90AB1/TXN/NFKB1/NFKB2/PYCARD/NLRP3/P2RX7/APP/CASP1/RELA/SUGT1	11
R-HSA-917937	Iron uptake and transport	26/2093	58/10654	1.11634e-05	6.96163e-05	4.39573e-05	ATP6V0E1/GLRX3/ATP6V0D1/FTH1/RPS27A/UBA52/UBB/ATP6V0B/ATP6V1F/TFRC/UBC/FTL/ATP6AP1/ATP6V1B2/HMOX1/ATP6V1A/SLC11A2/ATP6V0A1/TCIRG1/ATP6V1C1/CUL1/ATP6V1D/ATP6V1E1/FBXL5/SKP1/ATP6V1G1	26
R-HSA-9006934	Signaling by Receptor Tyrosine Kinases	130/2093	473/10654	1.53955e-05	9.55294e-05	6.03195e-05	MEF2C/NCF4/LYN/PRKCB/GRB2/LCK/PTPN1/ACTB/PTPN6/FYN/ACTG1/NCF1/ATP6V0E1/STAT6/SPINT2/ATP6V0D1/CALM2/HNRNPM/PIK3R1/GRAP2/FLT3LG/BRK1/HNRNPA1/SH2D2A/CALM1/RPS27A/UBA52/FGFBP2/CYBB/UBB/ATP6V0B/RAC1/ATP6V1F/PTK2B/RAP1B/ARF6/UBC/RAPGEF1/ADAM17/RHOA/EPS15/CYBA/FURIN/AP2S1/POLR2K/ABI1/CDC42/PTPN2/PSENEN/RALGDS/POLR2L/BAX/STAT3/RALA/SPP1/EREG/DUSP6/NCF2/NRP2/VEGFA/ATP6AP1/PTPN12/MMP9/SRC/TNS3/SPHK1/ATP6V1…	130
R-HSA-2172127	DAP12 interactions	21/2093	43/10654	1.54606e-05	9.55294e-05	6.03195e-05	BTK/SYK/GRB2/LCK/LAT/FYN/TYROBP/KLRD1/PIK3R1/GRAP2/LCP2/B2M/RAC1/CD300E/TREM1/CLEC5A/SIGLEC14/PIK3CB/NRAS/HLA-E/KRAS	21
R-HSA-1236977	Endosomal/Vacuolar pathway	9/2093	11/10654	1.60509e-05	9.87243e-05	6.23368e-05	B2M/HLA-B/HLA-A/HLA-C/CTSS/HLA-F/CTSL/HLA-E/LNPEP	9
R-HSA-72172	mRNA Splicing	62/2093	191/10654	1.63669e-05	0.00010021	6.32748e-05	SNRNP25/SNRPB/LSM7/SRSF3/SNRPD1/SNRPG/SNRPC/SNRPE/YBX1/HNRNPA2B1/LSM6/HNRNPR/LSM3/RNPS1/HNRNPM/SNU13/SNRPF/RBMX/SF3B6/HNRNPA3/HNRNPA1/PCBP1/POLR2K/BUD31/SF3B5/POLR2L/HNRNPU/DDX5/SNRPD2/SRSF9/HSPA8/RBM17/SRSF5/PTBP1/CTNNBL1/HNRNPH2/HNRNPD/POLR2E/PAPOLA/SF1/SRSF7/SYF2/SRRM1/FUS/LSM5/LSM8/POLR2C/POLR2H/MAGOHB/SF3B2/CD2BP2/PRPF38A/HNRNPL/WBP4/SRSF4/PABPN1/SMNDC1/SF3A1/U2AF1/HNRNPH1/HNRNPC/PCBP2	62
R-HSA-112409	RAF-independent MAPK1/3 activation	14/2093	23/10654	1.65614e-05	0.000100487	6.345e-05	PEA15/DUSP10/JAK1/IL6/DUSP1/DUSP6/MAP2K1/DUSP2/JAK2/IL6ST/IL6R/DUSP5/DUSP4/MAPK1	14
R-HSA-166208	mTORC1-mediated signalling	14/2093	23/10654	1.65614e-05	0.000100487	6.345e-05	LAMTOR5/EIF4EBP1/EIF4E/LAMTOR1/RPS6/EIF4B/RHEB/RRAGC/AKT1S1/LAMTOR3/LAMTOR2/LAMTOR4/EIF4G1/YWHAB	14
R-HSA-5675482	Regulation of necroptotic cell death	12/2093	18/10654	1.81898e-05	0.000109383	6.90667e-05	RPS27A/UBA52/UBB/FASLG/CFLAR/UBC/TNFSF10/BIRC3/BIRC2/XIAP/CASP8/FAS	12
R-HSA-936964	Activation of IRF3/IRF7 mediated by TBK1/IKK epsilon	12/2093	18/10654	1.81898e-05	0.000109383	6.90667e-05	TANK/IRF7/RPS27A/UBA52/UBB/UBC/LY96/IRF3/CD14/TLR4/TBK1/TRAF3	12
R-HSA-1257604	PIP3 activates AKT signaling	80/2093	264/10654	1.88316e-05	0.000112738	7.11856e-05	CD19/CD86/GRB2/LCK/LAMTOR5/PSMA4/PSMA2/PSME2/FYN/TRAT1/PSMB9/PSMB2/PSMA1/PSMB7/PSME1/PPP2R5C/LAMTOR1/PSMB6/ICOS/PSMB8/PSMB10/RAC2/PIK3R1/PSMA7/PSMB1/IER3/RPS27A/PIK3AP1/UBA52/UBB/CDKN1A/RAC1/UBC/PSMA6/SEM1/PSMD8/RHOG/PIP4K2A/EREG/SRC/EGR1/CD80/PPP2CB/PIK3CB/IRAK1/RHEB/JUN/IRS2/RRAGC/VAV1/FOXO3/AKT1S1/PPP2CA/TNKS2/MYD88/LAMTOR3/LAMTOR2/TNRC6B/XIAP/LAMTOR4/MAPK1/PSMC4/RPS6KB2/PSMA5/RBBP4/CHD4/PSMC1…	80
R-HSA-187037	Signaling by NTRK1 (TRKA)	32/2093	80/10654	2.07249e-05	0.000123524	7.7996e-05	MEF2C/GRB2/PIK3R1/RAPGEF1/RHOA/AP2S1/RALGDS/STAT3/RALA/DUSP6/SRC/DUSP3/PPP2CB/PIK3CB/CLTC/MAP2K1/IRS2/NRAS/MAPKAPK2/CLTA/PPP2CA/RPS6KA1/RALB/MAPKAPK3/MEF2A/RPS6KA3/DUSP4/MAPK1/KRAS/AP2M1/RIT1/YWHAB	32
R-HSA-69306	DNA Replication	45/2093	127/10654	2.09022e-05	0.000124032	7.83165e-05	MCM5/PSMA4/PSMA2/PSME2/PSMB9/POLD2/RPA3/PSMB2/POLD4/PSMA1/RBX1/PSMB7/PSME1/PSMB6/ANAPC11/PSMB8/PSMB10/PSMA7/PSMB1/RPS27A/UBA52/UBB/UBC/PSMA6/SEM1/PSMD8/UBE2D1/CUL1/UBE2E1/ANAPC16/SKP1/RFC1/RPA2/PSMC4/PSMA5/PSMC1/PSMB5/PSMD1/PSMD7/PSMB4/PSMA3/PSMD11/PSMD4/PSMD2/PSMD14	45
R-HSA-437239	Recycling pathway of L1	22/2093	47/10654	2.27961e-05	0.000134677	8.5038e-05	TUBA1B/EZR/ACTB/ACTG1/TUBA1C/TUBB4B/MSN/AP2S1/NUMB/TUBA1A/DPYSL2/TUBB6/SRC/SHTN1/RDX/CLTC/CLTA/RPS6KA1/RPS6KA3/MAPK1/TUBB2A/AP2M1	22
R-HSA-193639	p75NTR signals via NF-kB	11/2093	16/10654	2.68656e-05	0.000158026	9.97811e-05	RPS27A/UBA52/UBB/NFKB1/NFKBIA/RIPK2/UBC/IRAK1/SQSTM1/MYD88/RELA	11
R-HSA-2467813	Separation of Sister Chromatids	61/2093	190/10654	2.77683e-05	0.000162626	0.000102685	TUBA1B/PSMA4/PSMA2/PSME2/PTTG1/DYNLL1/PSMB9/TUBA1C/PSMB2/TUBB4B/PSMA1/PSMB7/PSME1/PPP2R5C/PSMB6/ANAPC11/PSMB8/PSMB10/PSMA7/PSMB1/KIF2A/RPS27A/RPS27/UBA52/UBB/UBC/PSMA6/SEM1/PSMD8/PAFAH1B1/TUBA1A/TUBB6/UBE2D1/PPP2CB/PPP2CA/TAOK1/UBE2E1/DYNC1LI1/DYNC1I2/ANAPC16/MAD1L1/PSMC4/PSMA5/STAG2/PSMC1/TUBB2A/NUP98/PSMB5/MAPRE1/PSMD1/PSMD7/NDE1/PSMB4/PSMA3/CLIP1/RAD21/PSMD11/PSMD4/PSMD2/XPO1/PSMD14	61
R-HSA-446203	Asparagine N-linked glycosylation	89/2093	304/10654	2.85198e-05	0.000166303	0.000105008	TUBA1B/ST6GALNAC4/NGLY1/ST6GAL1/DYNLL1/ALG13/TUBA1C/TUBB4B/CAPZA1/TRAPPC1/COPE/MGAT4A/RPS27A/UBA52/CTSC/UBB/TMED9/PDIA3/ANKRD28/ANK3/CALR/MGAT1/UBC/TMED10/ARF1/LMAN2/ARFGAP3/CANX/RPN1/COPA/RAB1A/OS9/DERL2/TMED2/GOLGB1/TUBA1A/SERPINA1/CTSZ/TUBB6/ASGR1/NPL/B4GALT5/B4GALT1/TMED7/KDELR2/NAGK/SEC24A/NANS/CTSA/NUS1/SEL1L/MAGT1/EDEM1/SEC24D/CD55/ARF3/ALG2/FUOM/MGAT2/RAD23B/CAPZA2/GANAB/VCP/UBXN1/SEC31A/…	89
R-HSA-2682334	EPH-Ephrin signaling	35/2093	92/10654	3.10026e-05	0.000180002	0.000113657	LYN/ACTB/FYN/ACTG1/ARPC3/ARPC4/CFL1/ARPC1B/ARPC5/ARPC2/MYL12A/MYL6/RAC1/ACTR2/RHOA/AP2S1/CDC42/MYH9/SDCBP/ACTR3/PSENEN/MYL12B/MMP9/SDC2/SRC/LIMK2/CLTC/PSEN1/ADAM10/PAK1/CLTA/PAK2/NCSTN/ARPC1A/AP2M1	35
R-HSA-168928	DDX58/IFIH1-mediated induction of interferon-alpha/beta	31/2093	78/10654	3.22429e-05	0.000185663	0.000117232	UBE2L6/TANK/IRF7/RPS27A/UBA52/TNFAIP3/UBB/NFKB1/NFKBIA/UBC/HMGB1/NFKB2/TAX1BP1/ISG15/IRF3/S100A12/UBE2D1/APP/TBK1/MAP3K1/TRIM25/RELA/CASP8/ATG12/UBE2D3/CYLD/DHX58/IFIH1/TRAF3/UBE2K/PCBP2	31
R-HSA-5260271	Diseases of Immune System	14/2093	24/10654	3.25648e-05	0.000185663	0.000117232	BTK/TLR10/NFKB1/NFKBIA/LY96/NFKB2/CD14/CD36/TLR2/TLR4/TLR1/MYD88/RELA/TRAF3	14
R-HSA-5602358	Diseases associated with the TLR signaling cascade	14/2093	24/10654	3.25648e-05	0.000185663	0.000117232	BTK/TLR10/NFKB1/NFKBIA/LY96/NFKB2/CD14/CD36/TLR2/TLR4/TLR1/MYD88/RELA/TRAF3	14
R-HSA-5627123	RHO GTPases activate PAKs	14/2093	24/10654	3.25648e-05	0.000185663	0.000117232	CALM2/CALM1/MYL12A/MYL6/RAC1/CDC42/MYH9/PPP1R12A/MYL12B/FLNA/PPP1CB/PAK1/PAK2/CALM3	14
R-HSA-9006925	Intracellular signaling by second messengers	89/2093	305/10654	3.26668e-05	0.000185663	0.000117232	CD19/CD86/GRB2/LCK/LAMTOR5/PSMA4/PSMA2/PSME2/FYN/TRAT1/PSMB9/PSMB2/PSMA1/PSMB7/PSME1/PPP2R5C/LAMTOR1/PSMB6/CALM2/CAMK4/ICOS/PSMB8/PSMB10/RAC2/PIK3R1/PSMA7/PSMB1/IER3/CALM1/RPS27A/PIK3AP1/UBA52/UBB/CDKN1A/RAC1/UBC/PRKAR1A/PSMA6/SEM1/PSMD8/RHOG/PIP4K2A/EREG/SRC/EGR1/CD80/PPP2CB/PIK3CB/IRAK1/RHEB/JUN/IRS2/RRAGC/AHCYL1/VAV1/FOXO3/AKT1S1/ITPR2/PPP2CA/TNKS2/MYD88/LAMTOR3/PRKAR2A/LAMTOR2/TNRC6B/XIAP/PRK…	89
R-HSA-195258	RHO GTPase Effectors	94/2093	327/10654	3.75981e-05	0.000212793	0.000134362	BTK/NCF4/TUBA1B/PRKCB/GRB2/ACTB/ACTG1/NCF1/DYNLL1/ARPC3/TUBA1C/ARPC4/TUBB4B/YWHAZ/YWHAE/CFL1/ARPC1B/PPP2R5C/CALM2/H2BC12/ARPC5/RAC2/H3-3A/ARPC2/BRK1/H2AZ1/KIF2A/EVL/CALM1/MYL12A/RPS27/H3-3B/CYBB/IQGAP1/RHOC/MYL6/PFN1/RAC1/ACTR2/RHOA/CYBA/FMNL1/YWHAQ/ABI1/CDC42/MYH9/ACTR3/WIPF1/PAFAH1B1/PPP1R12A/RHOG/TUBA1A/MYL12B/S100A9/S100A8/NCF2/RHOQ/TUBB6/SRC/LIMK2/CTNNA1/FMNL2/PPP2CB/FLNA/CTNNB1/YWHAG/TAX1BP…	94
R-HSA-3928662	EPHB-mediated forward signaling	20/2093	42/10654	3.92101e-05	0.000220987	0.000139536	LYN/ACTB/FYN/ACTG1/ARPC3/ARPC4/CFL1/ARPC1B/ARPC5/ARPC2/RAC1/ACTR2/RHOA/CDC42/ACTR3/SDC2/SRC/LIMK2/PAK1/ARPC1A	20
R-HSA-2871809	FCERI mediated Ca+2 mobilization	17/2093	33/10654	4.18783e-05	0.000235042	0.000148411	BTK/SYK/LYN/GRB2/LAT/ITK/CALM2/FCER1G/TXK/GRAP2/LCP2/CALM1/AHCYL1/VAV1/ITPR2/NFATC2/CALM3	17
R-HSA-193704	p75 NTR receptor-mediated signalling	36/2093	97/10654	4.46366e-05	0.000249483	0.000157529	FGD2/YWHAE/FGD3/RPS27A/UBA52/UBB/NFKB1/NFKBIA/RIPK2/RAC1/RTN4/BEX3/UBC/ADAM17/RHOA/ARHGDIA/PSENEN/AKAP13/ARHGEF1/ARHGEF10L/IRAK1/PSEN1/VAV1/SQSTM1/ABR/GNA13/PREX1/NCSTN/MYD88/ARHGEF2/RELA/ARHGEF3/BCL2L11/MAPK8/CASP3/HDAC2	36
R-HSA-8862803	Deregulated CDK5 triggers multiple neurodegenerative pathways in Alzheimer's disease models	13/2093	22/10654	5.21242e-05	0.000288935	0.00018244	PRDX1/YWHAE/FASLG/SOD2/LMNA/JUN/APP/FOXO3/CAPNS1/CAPN2/PRDX2/LMNB1/BCL2L11	13
R-HSA-8863678	Neurodegenerative Diseases	13/2093	22/10654	5.21242e-05	0.000288935	0.00018244	PRDX1/YWHAE/FASLG/SOD2/LMNA/JUN/APP/FOXO3/CAPNS1/CAPN2/PRDX2/LMNB1/BCL2L11	13
R-HSA-5689877	Josephin domain DUBs	9/2093	12/10654	5.29391e-05	0.000291057	0.00018378	RAD23A/RPS27A/UBA52/UBB/UBC/JOSD2/RAD23B/VCP/JOSD1	9
R-HSA-9013973	TICAM1-dependent activation of IRF3/IRF7	9/2093	12/10654	5.29391e-05	0.000291057	0.00018378	TANK/IRF7/RPS27A/UBA52/UBB/UBC/IRF3/TBK1/TRAF3	9
R-HSA-194315	Signaling by Rho GTPases	123/2093	455/10654	5.85502e-05	0.000320598	0.000202433	ARHGAP24/BTK/FGD2/NCF4/TUBA1B/PRKCB/GRB2/ACTB/ACTG1/NCF1/DYNLL1/ARPC3/TUBA1C/ARPC4/TUBB4B/GDI2/YWHAZ/YWHAE/CFL1/ARPC1B/PPP2R5C/CALM2/H2BC12/ARPC5/RAC2/H3-3A/ARPC2/BRK1/H2AZ1/KIF2A/FGD3/EVL/CALM1/MYL12A/RPS27/H3-3B/CYBB/IQGAP1/RHOC/MYL6/PFN1/RAC1/ARHGAP15/ACTR2/RHOA/CYBA/FMNL1/YWHAQ/ARHGDIA/ABI1/CDC42/MYH9/ACTR3/WIPF1/TAGAP/PAFAH1B1/ARAP2/PPP1R12A/AKAP13/RHOG/TUBA1A/RHOF/ARHGAP30/ARHGDIB/MYL12B/AR…	123
R-HSA-5675221	Negative regulation of MAPK pathway	19/2093	40/10654	6.37469e-05	0.00034764	0.000219508	PPP2R5C/PEBP1/RPS27A/UBA52/UBB/DUSP10/UBC/DUSP1/DUSP6/PPP2CB/MAP2K1/DUSP2/NRAS/DUSP5/PPP2CA/DUSP4/MAPK1/KRAS/YWHAB	19
R-HSA-109606	Intrinsic Pathway for Apoptosis	23/2093	53/10654	6.65438e-05	0.00036143	0.000228215	PMAIP1/BCL2/DYNLL1/YWHAZ/CYCS/YWHAE/BID/GZMB/YWHAQ/BAX/STAT3/YWHAG/XIAP/CASP8/MAPK1/BMF/BCL2L11/BCL2L1/MAPK8/CASP7/CASP3/NMT1/YWHAB	23
R-HSA-5602498	MyD88 deficiency (TLR2/4)	8/2093	10/10654	6.74049e-05	0.000364636	0.000230239	BTK/LY96/CD14/CD36/TLR2/TLR4/TLR1/MYD88	8
R-HSA-202733	Cell surface interactions at the vascular wall	46/2093	137/10654	7.86129e-05	0.000423567	0.000267449	JCHAIN/CD74/CD2/LYN/GRB2/LCK/PTPN6/FYN/PPIA/MIF/FCER1G/JAML/SPN/CD44/PIK3R1/GYPC/SELL/SLC16A3/ITGB2/CD58/BSG/ITGAL/DOK2/ITGA4/CD84/CD99/SIRPA/SLC7A7/ATP1B3/SLC7A11/SDC2/ITGAX/TREM1/SDC4/OLR1/SRC/SLC7A5/PIK3CB/ITGAV/NRAS/ITGA5/SLC3A2/CD47/CD48/GAS6/KRAS	46
R-HSA-6802946	Signaling by moderate kinase activity BRAF mutants	21/2093	47/10654	8.1858e-05	0.000434105	0.000274104	PHB/ACTB/ACTG1/CALM2/PEBP1/ARRB2/CALM1/IQGAP1/TLN1/RAP1B/SRC/ARRB1/MAP2K1/JAK2/NRAS/MAP3K11/APBB1IP/MAPK1/KRAS/CALM3/YWHAB	21
R-HSA-6802949	Signaling by RAS mutants	21/2093	47/10654	8.1858e-05	0.000434105	0.000274104	PHB/ACTB/ACTG1/CALM2/PEBP1/ARRB2/CALM1/IQGAP1/TLN1/RAP1B/SRC/ARRB1/MAP2K1/JAK2/NRAS/MAP3K11/APBB1IP/MAPK1/KRAS/CALM3/YWHAB	21
R-HSA-6802955	Paradoxical activation of RAF signaling by kinase inactive BRAF	21/2093	47/10654	8.1858e-05	0.000434105	0.000274104	PHB/ACTB/ACTG1/CALM2/PEBP1/ARRB2/CALM1/IQGAP1/TLN1/RAP1B/SRC/ARRB1/MAP2K1/JAK2/NRAS/MAP3K11/APBB1IP/MAPK1/KRAS/CALM3/YWHAB	21
R-HSA-9649948	Signaling downstream of RAS mutants	21/2093	47/10654	8.1858e-05	0.000434105	0.000274104	PHB/ACTB/ACTG1/CALM2/PEBP1/ARRB2/CALM1/IQGAP1/TLN1/RAP1B/SRC/ARRB1/MAP2K1/JAK2/NRAS/MAP3K11/APBB1IP/MAPK1/KRAS/CALM3/YWHAB	21
R-HSA-5213460	RIPK1-mediated regulated necrosis	12/2093	20/10654	8.32086e-05	0.00043782	0.00027645	RPS27A/UBA52/UBB/FASLG/CFLAR/UBC/TNFSF10/BIRC3/BIRC2/XIAP/CASP8/FAS	12
R-HSA-5218859	Regulated Necrosis	12/2093	20/10654	8.32086e-05	0.00043782	0.00027645	RPS27A/UBA52/UBB/FASLG/CFLAR/UBC/TNFSF10/BIRC3/BIRC2/XIAP/CASP8/FAS	12
R-HSA-69231	Cyclin D associated events in G1	20/2093	44/10654	8.96342e-05	0.000467974	0.000295489	LYN/CKS1B/CDK4/CCND3/RPS27A/UBA52/UBB/CDKN1A/UBC/CCND2/RBL2/SRC/PPP2CB/RB1/JAK2/CUL1/PPP2CA/SKP1/MNAT1/CDK6	20
R-HSA-69236	G1 Phase	20/2093	44/10654	8.96342e-05	0.000467974	0.000295489	LYN/CKS1B/CDK4/CCND3/RPS27A/UBA52/UBB/CDKN1A/UBC/CCND2/RBL2/SRC/PPP2CB/RB1/JAK2/CUL1/PPP2CA/SKP1/MNAT1/CDK6	20
R-HSA-76005	Response to elevated platelet cytosolic Ca2+	45/2093	134/10654	9.317e-05	0.000484556	0.000305959	PRKCB/TMSB4X/FAM3C/TAGLN2/PPIA/CFL1/CALM2/CTSW/ALDOA/SRGN/TIMP1/CALM1/PLEK/CD63/ANXA5/PFN1/HSPA5/ACTN4/PSAP/TLN1/SOD1/WDR1/MANF/FAM49B/LGALS3BP/CAP1/STXBP2/VTI1B/SERPINA1/CD9/SERPING1/CD36/VEGFA/LHFPL2/APLP2/LAMP2/FLNA/CALU/QSOX1/APP/FERMT3/ACTN1/STX4/GAS6/CALM3	45
R-HSA-8878171	Transcriptional regulation by RUNX1	71/2093	239/10654	0.000108786	0.000562326	0.000355065	PAX5/SMARCB1/PRMT1/PRKCB/PSMA4/PSMA2/PSME2/PSMB9/PSMB2/HIPK2/PSMA1/PSMB7/PSME1/PSMB6/CCND3/H2BC12/PSMB8/PSMB10/PSMA7/PSMB1/H3-3A/H2AZ1/IFNG/RPS27A/UBA52/H3-3B/UBB/LGALS3/IL2RA/UBC/PSMA6/SEM1/CCND2/PSMD8/SMARCE1/KMT2E/CTSL/SOCS3/SRC/RUNX1/NR4A3/RYBP/H2AJ/TNRC6B/ELF1/H4C3/SMARCC2/TNFRSF18/MNAT1/NFATC2/PSMC4/PSMA5/PSMC1/CDK6/RUNX2/AUTS2/PSMB5/CBX6/ARID1B/H2AZ2/PSMD1/PBRM1/PSMD7/SMARCC1/PSMB4/PSMA3/P…	71
R-HSA-114604	GPVI-mediated activation cascade	17/2093	35/10654	0.000108958	0.000562326	0.000355065	SYK/LYN/LCK/LAT/PTPN6/FYN/FCER1G/RAC2/PIK3R1/LCP2/RAC1/RHOA/CDC42/RHOG/PIK3CB/PIK3R5/VAV1	17
R-HSA-166520	Signaling by NTRKs	36/2093	101/10654	0.000117906	0.000606182	0.000382757	MEF2C/GRB2/FYN/PIK3R1/RAC1/RAPGEF1/RHOA/FURIN/AP2S1/RALGDS/BAX/STAT3/RALA/DUSP6/SRC/DUSP3/PPP2CB/PIK3CB/CLTC/MAP2K1/IRS2/NRAS/MAPKAPK2/CLTA/PPP2CA/RPS6KA1/RALB/MAPKAPK3/MEF2A/RPS6KA3/DUSP4/MAPK1/KRAS/AP2M1/RIT1/YWHAB	36
R-HSA-209560	NF-kB is activated and signals survival	9/2093	13/10654	0.000141932	0.000726932	0.000459001	RPS27A/UBA52/UBB/NFKB1/NFKBIA/UBC/IRAK1/SQSTM1/RELA	9
R-HSA-381070	IRE1alpha activates chaperones	22/2093	52/10654	0.000150448	0.000767625	0.000484696	PDIA6/YIF1A/CXXC1/ATP6V0D1/HSPA5/DNAJC3/MYDGF/TLN1/HYOU1/DNAJB11/XBP1/TPP1/DNAJB9/LMNA/HDGF/EDEM1/ZBTB17/SEC31A/SSR1/SRPRA/ACADVL/ADD1	22
R-HSA-5621575	CD209 (DC-SIGN) signaling	12/2093	21/10654	0.000159488	0.000808439	0.000510466	LYN/FYN/NFKB1/PAK1/NRAS/PAK2/RELB/RELA/ICAM3/ICAM2/PRKACB/KRAS	12
R-HSA-114608	Platelet degranulation	43/2093	129/10654	0.000159647	0.000808439	0.000510466	TMSB4X/FAM3C/TAGLN2/PPIA/CFL1/CALM2/CTSW/ALDOA/SRGN/TIMP1/CALM1/PLEK/CD63/ANXA5/PFN1/HSPA5/ACTN4/PSAP/TLN1/SOD1/WDR1/MANF/FAM49B/LGALS3BP/CAP1/STXBP2/VTI1B/SERPINA1/CD9/SERPING1/CD36/VEGFA/LHFPL2/APLP2/LAMP2/FLNA/CALU/QSOX1/APP/FERMT3/ACTN1/GAS6/CALM3	43
R-HSA-3700989	Transcriptional Regulation by TP53	100/2093	365/10654	0.00016587	0.000836805	0.000528377	PMAIP1/PRMT1/COX2/LAMTOR5/COX20/COX3/PRDX1/TCEA1/COX5A/BTG2/RPA3/COX6A1/YWHAZ/HIPK2/CYCS/YWHAE/COX16/BID/PPP2R5C/LAMTOR1/TAF7/COX7B/COX6C/NDUFA4/COX5B/ATM/CCNG1/TXN/NPM1/RPS27A/COX1/UBA52/UBB/COX7C/CDKN1A/COX4I1/NBN/UBC/SESN3/COX8A/POLR2K/YWHAQ/PRDX5/ELOB/POLR2L/BAX/BNIP3L/DDIT4/SGK1/PIP4K2A/RBL2/MEAF6/ZNF385A/FOS/NDRG1/PPP2CB/PRELID1/RHEB/JUN/PLK3/ELL/RRAGC/YWHAG/G6PD/ARID3A/BCL6/HIPK1/TAF13/PPP…	100
R-HSA-445989	TAK1 activates NFkB by phosphorylation and activation of IKKs complex	16/2093	33/10654	0.000178017	0.00089141	0.000562857	UBE2N/RPS27A/UBA52/UBB/NFKB1/NFKBIA/RIPK2/UBC/HMGB1/NFKB2/S100A12/IRAK2/IRAK1/APP/TAB2/RELA	16
R-HSA-5357905	Regulation of TNFR1 signaling	16/2093	33/10654	0.000178017	0.00089141	0.000562857	RPS27A/RACK1/UBA52/TNFAIP3/UBB/TNF/TRAF1/UBC/TAX1BP1/BIRC3/SPPL2A/BIRC2/XIAP/CASP8/RBCK1/CYLD	16
R-HSA-1059683	Interleukin-6 signaling	8/2093	11/10654	0.000204349	0.00101198	0.000638985	JAK1/STAT3/IL6/SOCS3/JAK2/IL6ST/IL6R/STAT1	8
R-HSA-5603041	IRAK4 deficiency (TLR2/4)	8/2093	11/10654	0.000204349	0.00101198	0.000638985	BTK/LY96/CD14/CD36/TLR2/TLR4/TLR1/MYD88	8
R-HSA-9020956	Interleukin-27 signaling	8/2093	11/10654	0.000204349	0.00101198	0.000638985	EBI3/CANX/JAK1/STAT3/IL27/JAK2/IL6ST/STAT1	8
R-HSA-5684264	MAP3K8 (TPL2)-dependent MAPK1/3 activation	10/2093	16/10654	0.000209231	0.00103236	0.000651854	RPS27A/UBA52/UBB/MAP3K8/NFKB1/UBC/MAP2K1/CUL1/TNIP2/SKP1	10
R-HSA-1433557	Signaling by SCF-KIT	19/2093	43/10654	0.000212183	0.00103931	0.000656245	LYN/GRB2/LCK/PTPN6/FYN/PIK3R1/GRAP2/RAC1/STAT3/MMP9/SRC/GAB2/JAK2/NRAS/VAV1/SH2B3/STAT5A/KRAS/STAT1	19
R-HSA-75893	TNF signaling	19/2093	43/10654	0.000212183	0.00103931	0.000656245	RPS27A/RACK1/UBA52/TNFAIP3/UBB/TNF/TRAF1/UBC/ADAM17/TAX1BP1/BIRC3/NSMAF/SPPL2A/BIRC2/TAB2/XIAP/CASP8/RBCK1/CYLD	19
R-HSA-72203	Processing of Capped Intron-Containing Pre-mRNA	71/2093	244/10654	0.000217563	0.0010618	0.000670445	SNRNP25/SNRPB/THOC6/LSM7/SRSF3/SNRPD1/SNRPG/SNRPC/EIF4E/SNRPE/YBX1/HNRNPA2B1/LSM6/HNRNPR/LSM3/RNPS1/HNRNPM/SNU13/SNRPF/RBMX/SF3B6/HNRNPA3/HNRNPA1/PCBP1/POLR2K/BUD31/SF3B5/POLR2L/HNRNPU/DDX5/WTAP/NUP58/NUP62/SNRPD2/SRSF9/NUP214/HSPA8/RBM17/SRSF5/PTBP1/CTNNBL1/HNRNPH2/HNRNPD/POLR2E/PAPOLA/SF1/SRSF7/SYF2/SRRM1/TPR/FUS/LSM5/LSM8/POLR2C/POLR2H/MAGOHB/SF3B2/CD2BP2/PRPF38A/FYTTD1/NUP98/HNRNPL/WBP4/SRSF4…	71
R-HSA-381038	XBP1(S) activates chaperone genes	21/2093	50/10654	0.000239127	0.00116283	0.000734236	PDIA6/YIF1A/CXXC1/ATP6V0D1/DNAJC3/MYDGF/TLN1/HYOU1/DNAJB11/XBP1/TPP1/DNAJB9/LMNA/HDGF/EDEM1/ZBTB17/SEC31A/SSR1/SRPRA/ACADVL/ADD1	21
R-HSA-5205685	Pink/Parkin Mediated Mitophagy	12/2093	22/10654	0.000288325	0.00139703	0.000882116	TOMM22/TOMM7/TOMM5/VDAC1/RPS27A/UBA52/UBB/UBC/TOMM20/MAP1LC3B/SQSTM1/ATG12	12
R-HSA-8949613	Cristae formation	15/2093	31/10654	0.000291256	0.00140617	0.000887889	ATP5MC1/ATP6/ATP5F1B/ATP5MC3/MICOS13/ATP5PF/ATP5MF/ATP5F1E/ATP5MC2/ATP5MG/ATP8/ATP5F1A/HSPA9/ATP5PO/ATP5PD	15
R-HSA-8983432	Interleukin-15 signaling	9/2093	14/10654	0.000328	0.00157791	0.00099633	GRB2/IL2RB/IL2RG/JAK1/STAT3/GAB2/IL15RA/IL15/STAT5A	9
R-HSA-5689603	UCH proteinases	35/2093	102/10654	0.000339057	0.0016253	0.00102625	PSMA4/ACTB/PSMA2/PSME2/PSMB9/PSMB2/PSMA1/PSMB7/PSME1/ADRM1/PSMB6/PSMB8/PSMB10/PSMA7/PSMB1/RPS27A/UBA52/UBB/UBC/PSMA6/SEM1/PSMD8/TGFBR1/PSMC4/PSMA5/PSMC1/PSMB5/PSMD1/PSMD7/PSMB4/PSMA3/PSMD11/PSMD4/PSMD2/PSMD14	35
R-HSA-380108	Chemokine receptors bind chemokines	23/2093	59/10654	0.000454866	0.00216627	0.00136783	CXCR5/CXCL10/CCL22/CCR7/XCL2/CXCL2/CXCL8/CXCL3/CXCR3/CXCL1/CXCL5/CCL2/CXCL9/CXCL16/CCRL2/CCR1/CCR5/CCL20/CXCL11/CXCR4/XCL1/CCL19/CXCL13	23
R-HSA-75153	Apoptotic execution phase	21/2093	52/10654	0.000455125	0.00216627	0.00136783	DBNL/SATB1/VIM/HMGB1/GSN/LMNA/H1-0/TJP2/PLEC/CTNNB1/STK26/BIRC2/PAK2/BCAP31/CASP8/HMGB2/LMNB1/CASP7/ADD1/CASP3/H1-2	21
R-HSA-5627117	RHO GTPases Activate ROCKs	11/2093	20/10654	0.000472814	0.00224254	0.00141599	CFL1/MYL12A/RHOC/MYL6/RHOA/MYH9/PPP1R12A/MYL12B/LIMK2/PPP1CB/PAK1	11
R-HSA-77387	Insulin receptor recycling	13/2093	26/10654	0.00049465	0.0023297	0.00147102	ATP6V0E1/ATP6V0D1/ATP6V0B/ATP6V1F/ATP6AP1/ATP6V1B2/ATP6V1A/ATP6V0A1/TCIRG1/ATP6V1C1/ATP6V1D/ATP6V1E1/ATP6V1G1	13
R-HSA-901042	Calnexin/calreticulin cycle	13/2093	26/10654	0.00049465	0.0023297	0.00147102	RPS27A/UBA52/UBB/PDIA3/CALR/UBC/CANX/OS9/DERL2/SEL1L/EDEM1/GANAB/RNF5	13
R-HSA-264870	Caspase-mediated cleavage of cytoskeletal proteins	8/2093	12/10654	0.000507168	0.00235571	0.00148745	DBNL/VIM/GSN/PLEC/CASP8/CASP7/ADD1/CASP3	8
R-HSA-3371511	HSF1 activation	8/2093	12/10654	0.000507168	0.00235571	0.00148745	HSP90AB1/RPA3/YWHAE/HSBP1/EEF1A1/VCP/RPA2/HSP90AA1	8
R-HSA-8984722	Interleukin-35 Signalling	8/2093	12/10654	0.000507168	0.00235571	0.00148745	EBI3/STAT4/CANX/JAK1/STAT3/JAK2/IL6ST/STAT1	8
R-HSA-9020558	Interleukin-2 signaling	8/2093	12/10654	0.000507168	0.00235571	0.00148745	SYK/LCK/IL2RB/IL2RA/PTK2B/IL2RG/JAK1/STAT5A	8
R-HSA-1834949	Cytosolic sensors of pathogen-associated DNA	24/2093	63/10654	0.000514095	0.00237968	0.00150258	STAT6/LRRFIP1/IRF7/RPS27A/UBA52/UBB/NFKB1/NFKBIA/STING1/UBC/POLR2K/POLR2L/NFKB2/ZBP1/IRF3/TBK1/CTNNB1/IFI16/MYD88/RELA/POLR2E/POLR1D/POLR2H/XRCC6	24
R-HSA-6807878	COPI-mediated anterograde transport	34/2093	101/10654	0.000609129	0.00280992	0.00177425	TUBA1B/DYNLL1/TUBA1C/TUBB4B/CAPZA1/COPE/TMED9/ANK3/TMED10/ARF1/ARFGAP3/COPA/RAB1A/TMED2/GOLGB1/TUBA1A/TUBB6/TMED7/KDELR2/CD55/ARF3/CAPZA2/CD59/DYNC1LI1/ARF4/ARCN1/DYNC1I2/COPB2/COPZ1/STX5/ARFGAP2/TUBB2A/NAPA/CAPZB	34
R-HSA-168638	NOD1/2 Signaling Pathway	16/2093	36/10654	0.000612763	0.00281704	0.00177874	UBE2N/RPS27A/UBA52/TNFAIP3/UBB/RIPK2/UBC/CASP4/BIRC3/IRAK2/IRAK1/BIRC2/CASP1/TAB2/CASP8/CYLD	16
R-HSA-389356	CD28 co-stimulation	15/2093	33/10654	0.000675578	0.0030918	0.00195223	CD86/LYN/GRB2/LCK/FYN/PIK3R1/GRAP2/MAP3K8/RAC1/CDC42/SRC/CD80/PAK1/VAV1/PAK2	15
R-HSA-975110	TRAF6 mediated IRF7 activation in TLR7/8 or 9 signaling	9/2093	15/10654	0.000677121	0.0030918	0.00195223	UBE2N/IRF7/RPS27A/UBA52/UBB/UBC/TLR8/IRAK1/MYD88	9
R-HSA-5357956	TNFR1-induced NFkappaB signaling pathway	14/2093	30/10654	0.000734426	0.00333088	0.0021032	RPS27A/RACK1/UBA52/TNFAIP3/UBB/TNF/TRAF1/UBC/BIRC3/BIRC2/TAB2/XIAP/RBCK1/CYLD	14
R-HSA-8866652	Synthesis of active ubiquitin: roles of E1 and E2 enzymes	14/2093	30/10654	0.000734426	0.00333088	0.0021032	RPS27A/UBA52/UBB/UBC/UBE2A/UBE2Z/UBE2L3/UBE2D1/UBE2R2/UBE2E1/USP9X/UBA6/UBE2K/UBE2B	14
R-HSA-165159	mTOR signalling	17/2093	40/10654	0.000783026	0.00351847	0.00222164	LAMTOR5/EIF4EBP1/EIF4E/LAMTOR1/RPS6/EIF4B/RHEB/RRAGC/AKT1S1/PPM1A/PRKAG2/LAMTOR3/LAMTOR2/LAMTOR4/PRKAG1/EIF4G1/YWHAB	17
R-HSA-5674135	MAP2K and MAPK activation	17/2093	40/10654	0.000783026	0.00351847	0.00222164	ACTB/ACTG1/PEBP1/ARRB2/IQGAP1/TLN1/RAP1B/SRC/ARRB1/MAP2K1/NRAS/LAMTOR3/LAMTOR2/APBB1IP/MAPK1/KRAS/YWHAB	17
R-HSA-912526	Interleukin receptor SHC signaling	13/2093	27/10654	0.000783624	0.00351847	0.00222164	GRB2/PTPN6/PIK3R1/IL2RB/IL2RA/IL2RG/JAK1/CSF2RB/CSF2RA/IL3RA/GAB2/PIK3CB/JAK2	13
R-HSA-5389840	Mitochondrial translation elongation	30/2093	87/10654	0.000797479	0.00356879	0.00225341	MRPL12/MRPL4/MRPL44/MRPL15/MRPL13/MRPL52/MRPS23/MRPL40/AURKAIP1/MRPL11/MRPS18A/CHCHD1/MRPL28/MRPS12/MRPS15/MRPL54/MRPL42/MRPL51/MRPL18/MRPS36/TUFM/MRPL32/MRPL14/MRPL20/MRPS33/MRPL10/MRPL27/MRPS31/MRPL9/MRPL33	30
R-HSA-8939236	RUNX1 regulates transcription of genes involved in differentiation of HSCs	41/2093	130/10654	0.000811445	0.00361028	0.00227961	PSMA4/PSMA2/PSME2/PSMB9/PSMB2/PSMA1/PSMB7/PSME1/PSMB6/H2BC12/PSMB8/PSMB10/PSMA7/PSMB1/H3-3A/H2AZ1/RPS27A/UBA52/H3-3B/UBB/UBC/PSMA6/SEM1/PSMD8/RUNX1/H2AJ/H4C3/MNAT1/PSMC4/PSMA5/PSMC1/PSMB5/H2AZ2/PSMD1/PSMD7/PSMB4/PSMA3/PSMD11/PSMD4/PSMD2/PSMD14	41
R-HSA-450302	activated TAK1 mediates p38 MAPK activation	12/2093	24/10654	0.000815021	0.00361028	0.00227961	UBE2N/RPS27A/UBA52/UBB/RIPK2/UBC/MAP2K3/IRAK2/IRAK1/MAPKAPK2/MAPKAPK3/TAB2	12
R-HSA-982772	Growth hormone receptor signaling	12/2093	24/10654	0.000815021	0.00361028	0.00227961	LYN/PTPN1/PTPN6/ADAM17/STAT3/SOCS3/IRS2/JAK2/MAPK1/SOCS2/STAT5A/STAT1	12
R-HSA-5218921	VEGFR2 mediated cell proliferation	11/2093	21/10654	0.000817473	0.00361028	0.00227961	PRKCB/CALM2/CALM1/VEGFA/SRC/SPHK1/AHCYL1/NRAS/ITPR2/KRAS/CALM3	11
R-HSA-1592230	Mitochondrial biogenesis	32/2093	95/10654	0.000859138	0.00378189	0.00238797	MEF2C/ATP5MC1/ATP6/ATP5F1B/CYCS/ATP5MC3/CALM2/CAMK4/MICOS13/ATP5PF/ATP5MF/CALM1/SOD2/CHD9/RXRA/ATP5F1E/ALAS1/ATP5MC2/ATP5MG/PRKAG2/ATP8/ATP5F1A/HSPA9/ATP5PO/SSBP1/NCOA1/ATP5PD/HELZ2/PRKAG1/GABPB1/PPARA/CALM3	32
R-HSA-373755	Semaphorin interactions	24/2093	65/10654	0.000869149	0.0038135	0.00240793	CD72/PTPRC/HSP90AB1/FYN/TYROBP/CFL1/MYL12A/RHOC/MYL6/TLN1/RAC1/RHOA/MYH9/MYL12B/DPYSL2/SEMA4A/LIMK2/PLXND1/PLXNC1/PAK1/PAK2/SEMA4D/SEMA7A/HSP90AA1	24
R-HSA-171007	p38MAPK events	8/2093	13/10654	0.00109154	0.00471617	0.0029779	RALGDS/RALA/SRC/NRAS/MAPKAPK2/RALB/MAPKAPK3/KRAS	8
R-HSA-209543	p75NTR recruits signalling complexes	8/2093	13/10654	0.00109154	0.00471617	0.0029779	RPS27A/UBA52/UBB/RIPK2/UBC/IRAK1/SQSTM1/MYD88	8
R-HSA-5210891	Uptake and function of anthrax toxins	8/2093	13/10654	0.00109154	0.00471617	0.0029779	CALM2/CALM1/FURIN/MAP2K3/ANTXR2/MAP2K1/MAP2K7/CALM3	8
R-HSA-2122948	Activated NOTCH1 Transmits Signal to the Nucleus	14/2093	31/10654	0.00109939	0.00471617	0.0029779	ARRB2/RPS27A/UBA52/UBB/UBC/ADAM17/NUMB/PSENEN/ARRB1/PSEN1/DTX2/ADAM10/NCSTN/DLL4	14
R-HSA-450282	MAPK targets/ Nuclear events mediated by MAP kinases	14/2093	31/10654	0.00109939	0.00471617	0.0029779	MEF2C/DUSP6/FOS/DUSP3/PPP2CB/JUN/MAPKAPK2/PPP2CA/RPS6KA1/MEF2A/RPS6KA3/DUSP4/MAPK1/MAPK8	14
R-HSA-5339562	Uptake and actions of bacterial toxins	14/2093	31/10654	0.00109939	0.00471617	0.0029779	HSP90AB1/CALM2/EEF2/CALM1/FURIN/VAMP2/CD9/MAP2K3/ANTXR2/MAP2K1/TXNRD1/MAP2K7/CALM3/HSP90AA1	14
R-HSA-917977	Transferrin endocytosis and recycling	14/2093	31/10654	0.00109939	0.00471617	0.0029779	ATP6V0E1/ATP6V0D1/ATP6V0B/ATP6V1F/TFRC/ATP6AP1/ATP6V1B2/ATP6V1A/ATP6V0A1/TCIRG1/ATP6V1C1/ATP6V1D/ATP6V1E1/ATP6V1G1	14
R-HSA-389957	Prefoldin mediated transfer of substrate to CCT/TriC	13/2093	28/10654	0.00120197	0.00513984	0.00324541	ACTB/CCT5/PFDN6/TUBA1C/CCT6A/TUBB4B/CCT3/PFDN2/PFDN5/TUBA1A/TUBB6/TUBB2A/CCT7	13
R-HSA-111465	Apoptotic cleavage of cellular proteins	16/2093	38/10654	0.00125277	0.00534014	0.00337188	DBNL/SATB1/VIM/GSN/LMNA/TJP2/PLEC/CTNNB1/STK26/BIRC2/BCAP31/CASP8/LMNB1/CASP7/ADD1/CASP3	16
R-HSA-1295596	Spry regulation of FGF signaling	9/2093	16/10654	0.00127869	0.00534378	0.00337418	GRB2/RPS27A/UBA52/UBB/UBC/SRC/PPP2CB/PPP2CA/MAPK1	9
R-HSA-175474	Assembly Of The HIV Virion	9/2093	16/10654	0.00127869	0.00534378	0.00337418	PPIA/RPS27A/UBA52/UBB/UBC/FURIN/NMT2/VPS37B/TSG101	9
R-HSA-205043	NRIF signals cell death from the nucleus	9/2093	16/10654	0.00127869	0.00534378	0.00337418	RPS27A/UBA52/UBB/UBC/PSENEN/PSEN1/SQSTM1/NCSTN/MAPK8	9
R-HSA-2730905	Role of LAT2/NTAL/LAB on calcium mobilization	9/2093	16/10654	0.00127869	0.00534378	0.00337418	LAT2/SYK/LYN/GRB2/FYN/FCER1G/PIK3R1/GAB2/PIK3CB	9
R-HSA-391160	Signal regulatory protein family interactions	9/2093	16/10654	0.00127869	0.00534378	0.00337418	SKAP2/FYB1/GRB2/PTPN6/TYROBP/PTK2B/SIRPA/SRC/CD47	9
R-HSA-975163	IRAK2 mediated activation of TAK1 complex upon TLR7/8 or 9 stimulation	9/2093	16/10654	0.00127869	0.00534378	0.00337418	RPS27A/UBA52/UBB/UBC/LY96/CD14/TLR4/IRAK2/TAB2	9
R-HSA-2029485	Role of phospholipids in phagocytosis	12/2093	25/10654	0.00128933	0.00534378	0.00337418	SYK/CD247/CD3G/PIK3R1/FCGR3A/FCGR2A/FCGR1A/PLD3/PLD1/PIK3CB/AHCYL1/ITPR2	12
R-HSA-9006335	Signaling by Erythropoietin	12/2093	25/10654	0.00128933	0.00534378	0.00337418	LYN/GRB2/PIK3R1/RAPGEF1/PIK3CB/IRS2/PIK3R5/JAK2/NRAS/VAV1/STAT5A/KRAS	12
R-HSA-937041	IKK complex recruitment mediated by RIP1	12/2093	25/10654	0.00128933	0.00534378	0.00337418	UBE2N/RPS27A/UBA52/UBB/UBC/LY96/BIRC3/CD14/TLR4/UBE2D1/BIRC2/UBE2D3	12
R-HSA-9615710	Microautophagy	15/2093	35/10654	0.00142356	0.00588203	0.00371404	PARK7/RPS27A/UBA52/UBB/UBC/VIM/PLIN2/CHMP4A/RNASE1/CHMP4B/HSPA8/PLIN3/CHMP2A/VPS37B/TSG101	15
R-HSA-199977	ER to Golgi Anterograde Transport	46/2093	154/10654	0.00146569	0.00603755	0.00381225	TUBA1B/DYNLL1/TUBA1C/TUBB4B/CAPZA1/TRAPPC1/COPE/CTSC/TMED9/ANKRD28/ANK3/TMED10/ARF1/LMAN2/ARFGAP3/COPA/RAB1A/TMED2/GOLGB1/TUBA1A/SERPINA1/CTSZ/TUBB6/TMED7/KDELR2/SEC24A/SEC24D/CD55/ARF3/CAPZA2/SEC31A/CD59/DYNC1LI1/ARF4/ARCN1/DYNC1I2/COPB2/COPZ1/CSNK1D/STX5/LMAN1/ARFGAP2/TUBB2A/TFG/NAPA/CAPZB	46
R-HSA-389958	Cooperation of Prefoldin and TriC/CCT in actin and tubulin folding	14/2093	32/10654	0.00160493	0.00655102	0.00413646	TUBA1B/ACTB/CCT5/PFDN6/TUBA1C/CCT6A/TUBB4B/CCT3/PFDN2/PFDN5/TUBA1A/TUBB6/TUBB2A/CCT7	14
R-HSA-456926	Thrombin signalling through proteinase activated receptors (PARs)	14/2093	32/10654	0.00160493	0.00655102	0.00413646	GNG7/GNG5/ARRB2/GNG2/GNB1/SRC/GNB4/GNA15/GNAQ/ARRB1/GNB2/GNA13/MAPK1/GNA12	14
R-HSA-5673000	RAF activation	14/2093	32/10654	0.00160493	0.00655102	0.00413646	PHB/PPP2R5C/CALM2/CALM1/SRC/PPP2CB/MAP2K1/JAK2/NRAS/PPP2CA/MAP3K11/KRAS/CALM3/YWHAB	14
R-HSA-195721	Signaling by WNT	87/2093	331/10654	0.00172155	0.00700584	0.00442365	GNG7/PRKCB/SNX3/PSMA4/PSMA2/PSME2/PSMB9/TCF7/PSMB2/YWHAZ/PSMA1/RBX1/PSMB7/PSME1/PPP2R5C/LEF1/GNG5/PSMB6/CALM2/H2BC12/PSMB8/PSMB10/RAC2/PSMA7/PSMB1/H3-3A/TLE5/H2AZ1/ARRB2/CALM1/RPS27A/UBA52/H3-3B/UBB/GNG2/PFN1/RUNX3/MYC/RAC1/UBC/RHOA/GNB1/AP2S1/PSMA6/TMED5/SEM1/PSMD8/GNB4/PPP2CB/CLTC/TCF7L2/GNB2/CTNNB1/CUL1/CLTA/H2AJ/ITPR2/PPP2CA/TNKS2/VPS29/TNRC6B/XIAP/H4C3/SKP1/TLE4/PSMC4/PSMA5/PSMC1/SOX4/PSMB5/…	87
R-HSA-5619115	Disorders of transmembrane transporters	51/2093	176/10654	0.00174935	0.00707626	0.00446811	PSMA4/PSMA2/PSME2/PSMB9/PSMB2/PSMA1/PSMB7/PSME1/PSMB6/PSMB8/PSMB10/PSMA7/PSMB1/RPS27A/UBA52/UBB/BSG/UBC/PSMA6/SEM1/OS9/ERLEC1/DERL2/PSMD8/ABCA1/SLC1A3/SLC7A7/SLC11A2/NUP58/NUP62/SEL1L/NUP214/VCP/SLC3A2/TPR/RNF5/DERL1/PSMC4/PSMA5/PSMC1/SLC2A1/NUP98/PSMB5/PSMD1/PSMD7/PSMB4/PSMA3/PSMD11/PSMD4/PSMD2/PSMD14	51
R-HSA-5661231	Metallothioneins bind metals	7/2093	11/10654	0.00174937	0.00707626	0.00446811	MT2A/MT1F/MT1X/MT1G/MT1E/MT1M/MT1H	7
R-HSA-5368286	Mitochondrial translation initiation	29/2093	87/10654	0.00176458	0.00709519	0.00448006	MRPL12/MRPL4/MRPL44/MRPL15/MRPL13/MRPL52/MRPS23/MRPL40/AURKAIP1/MRPL11/MRPS18A/CHCHD1/MRPL28/MRPS12/MRPS15/MRPL54/MRPL42/MRPL51/MRPL18/MRPS36/MRPL32/MRPL14/MRPL20/MRPS33/MRPL10/MRPL27/MRPS31/MRPL9/MRPL33	29
R-HSA-5419276	Mitochondrial translation termination	29/2093	87/10654	0.00176458	0.00709519	0.00448006	MRPL12/MRPL4/MRPL44/MRPL15/MRPL13/MRPL52/MRPS23/MRPL40/AURKAIP1/MRPL11/MRPS18A/CHCHD1/MRPL28/MRPS12/MRPS15/MRPL54/MRPL42/MRPL51/MRPL18/MRPS36/MRPL32/MRPL14/MRPL20/MRPS33/MRPL10/MRPL27/MRPS31/MRPL9/MRPL33	29
R-HSA-5205647	Mitophagy	13/2093	29/10654	0.00179076	0.00715774	0.00451956	TOMM22/TOMM7/TOMM5/VDAC1/RPS27A/UBA52/UBB/UBC/TOMM20/SRC/MAP1LC3B/SQSTM1/ATG12	13
R-HSA-8982491	Glycogen metabolism	13/2093	29/10654	0.00179076	0.00715774	0.00451956	CALM2/UGP2/CALM1/RPS27A/UBA52/UBB/UBC/GAA/GBE1/PGM1/GYS1/PHKB/CALM3	13
R-HSA-180024	DARPP-32 events	12/2093	26/10654	0.00197048	0.00785278	0.00495843	PPP1CA/CALM2/PDE4D/CALM1/PRKAR1A/PPP2CB/PDE4B/PDE4A/PPP2CA/PRKAR2A/PRKACB/CALM3	12
R-HSA-6802948	Signaling by high-kinase activity BRAF mutants	15/2093	36/10654	0.00200271	0.00795766	0.00502465	ACTB/ACTG1/PEBP1/ARRB2/IQGAP1/TLN1/RAP1B/SRC/ARRB1/MAP2K1/NRAS/APBB1IP/MAPK1/KRAS/YWHAB	15
R-HSA-418359	Reduction of cytosolic Ca++ levels	8/2093	14/10654	0.0021096	0.00830888	0.00524642	ATP2B1/SRI/CALM2/CALM1/SLC8A1/ATP2A2/ATP2B4/CALM3	8
R-HSA-5660526	Response to metal ions	8/2093	14/10654	0.0021096	0.00830888	0.00524642	MT2A/MT1F/MT1X/MT1G/MT1E/MT1M/MTF1/MT1H	8
R-HSA-9027284	Erythropoietin activates RAS	8/2093	14/10654	0.0021096	0.00830888	0.00524642	LYN/GRB2/RAPGEF1/IRS2/JAK2/NRAS/VAV1/KRAS	8
R-HSA-2173795	Downregulation of SMAD2/3:SMAD4 transcriptional activity	11/2093	23/10654	0.00212675	0.00832773	0.00525832	PARP1/SKIL/RPS27A/UBA52/UBB/UBC/UBE2D1/NCOR2/PPM1A/UBE2D3/USP9X	11
R-HSA-450321	JNK (c-Jun kinases) phosphorylation and activation mediated by activated human TAK1	11/2093	23/10654	0.00212675	0.00832773	0.00525832	UBE2N/RPS27A/UBA52/UBB/RIPK2/UBC/IRAK2/IRAK1/TAB2/MAP2K7/MAPK8	11
R-HSA-8876384	Listeria monocytogenes entry into host cells	10/2093	20/10654	0.00223234	0.00871585	0.00550338	GRB2/RPS27A/UBA52/UBB/UBC/EPS15/SRC/CTNND1/CTNNB1/SH3KBP1	10
R-HSA-937072	TRAF6-mediated induction of TAK1 complex within TLR4 complex	9/2093	17/10654	0.00224614	0.00874437	0.00552139	RPS27A/UBA52/UBB/UBC/LY96/CD14/TLR4/IRAK2/TAB2	9
R-HSA-1980143	Signaling by NOTCH1	25/2093	73/10654	0.00234438	0.00910051	0.00574627	RBX1/ARRB2/RPS27A/UBA52/UBB/MYC/UBC/ADAM17/HIF1A/NUMB/PSENEN/RBPJ/ARRB1/PSEN1/DTX2/ADAM10/NCOR2/CUL1/NCSTN/MAML2/SKP1/TLE4/DLL4/TLE3/HDAC2	25
R-HSA-5368287	Mitochondrial translation	30/2093	93/10654	0.00263062	0.0101823	0.00642935	MRPL12/MRPL4/MRPL44/MRPL15/MRPL13/MRPL52/MRPS23/MRPL40/AURKAIP1/MRPL11/MRPS18A/CHCHD1/MRPL28/MRPS12/MRPS15/MRPL54/MRPL42/MRPL51/MRPL18/MRPS36/TUFM/MRPL32/MRPL14/MRPL20/MRPS33/MRPL10/MRPL27/MRPS31/MRPL9/MRPL33	30
R-HSA-400253	Circadian Clock	24/2093	70/10654	0.00279088	0.0107717	0.00680147	MEF2C/BHLHE41/PPP1CA/RORA/RPS27A/UBA52/UBB/BHLHE40/NAMPT/UBC/HIF1A/CHD9/CREM/RXRA/PPP1CB/CUL1/SKP1/RBM4/NCOA1/CSNK1D/HELZ2/ARNTL2/PPARA/NRIP1	24
R-HSA-164952	The role of Nef in HIV-1 replication and disease pathogenesis	12/2093	27/10654	0.00291997	0.0112377	0.00709575	CD247/LCK/FYN/CD8B/B2M/HCK/RAC1/ARF1/AP2S1/AP1S2/PAK2/AP2M1	12
R-HSA-187687	Signalling to ERKs	14/2093	34/10654	0.00319843	0.0122743	0.00775029	GRB2/RAPGEF1/RALGDS/RALA/SRC/MAP2K1/NRAS/MAPKAPK2/RALB/MAPKAPK3/MAPK1/KRAS/RIT1/YWHAB	14
R-HSA-948021	Transport to the Golgi and subsequent modification	52/2093	185/10654	0.00322903	0.0123159	0.00777651	TUBA1B/ST6GAL1/DYNLL1/TUBA1C/TUBB4B/CAPZA1/TRAPPC1/COPE/MGAT4A/CTSC/TMED9/ANKRD28/ANK3/MGAT1/TMED10/ARF1/LMAN2/ARFGAP3/COPA/RAB1A/TMED2/GOLGB1/TUBA1A/SERPINA1/CTSZ/TUBB6/B4GALT5/B4GALT1/TMED7/KDELR2/SEC24A/SEC24D/CD55/ARF3/MGAT2/CAPZA2/SEC31A/CD59/DYNC1LI1/ARF4/ARCN1/DYNC1I2/COPB2/COPZ1/CSNK1D/STX5/LMAN1/ARFGAP2/TUBB2A/TFG/NAPA/CAPZB	52
R-HSA-449836	Other interleukin signaling	11/2093	24/10654	0.00323668	0.0123159	0.00777651	IL32/STXBP2/JAK1/VAMP2/CSF3/CSF1R/CSF3R/IL10RB/STX4/IL16/CASP3	11
R-HSA-5668599	RHO GTPases Activate NADPH Oxidases	11/2093	24/10654	0.00323668	0.0123159	0.00777651	NCF4/PRKCB/NCF1/RAC2/CYBB/RAC1/CYBA/S100A9/S100A8/NCF2/MAPK1	11
R-HSA-9008059	Interleukin-37 signaling	10/2093	21/10654	0.00351859	0.0133508	0.00843001	PTPN6/PTPN2/PTPN7/STAT3/PTPN4/IL18BP/PTPN12/TBK1/CASP1/PTPN18	10
R-HSA-429914	Deadenylation-dependent mRNA decay	20/2093	56/10654	0.00357357	0.0135214	0.00853769	PABPC1/LSM7/EIF4E/LSM6/LSM3/EIF4A1/EIF4A2/EIF4B/TUT7/PATL1/DCP2/TUT4/EXOSC8/LSM5/DDX6/XRN1/CNOT4/EIF4G1/PAN3/CNOT7	20
R-HSA-1839117	Signaling by cytosolic FGFR1 fusion mutants	9/2093	18/10654	0.00371552	0.0139799	0.00882723	GRB2/LRRFIP1/PIK3R1/STAT3/GAB2/CUX1/ZMYM2/STAT5A/STAT1	9
R-HSA-446353	Cell-extracellular matrix interactions	9/2093	18/10654	0.00371552	0.0139799	0.00882723	ACTB/ACTG1/VASP/ILK/LIMS1/PARVB/FLNA/ACTN1/RSU1	9
R-HSA-3134975	Regulation of innate immune responses to cytosolic DNA	8/2093	15/10654	0.00374673	0.0139966	0.00883774	RPS27A/UBA52/UBB/STING1/UBC/ZBP1/IRF3/TBK1	8
R-HSA-430039	mRNA decay by 5' to 3' exoribonuclease	8/2093	15/10654	0.00374673	0.0139966	0.00883774	LSM7/LSM6/LSM3/PATL1/DCP2/LSM5/DDX6/XRN1	8
R-HSA-5689896	Ovarian tumor domain proteases	15/2093	38/10654	0.00375112	0.0139966	0.00883774	RPS27A/UBA52/TNFAIP3/UBB/TNIP3/RIPK2/TNIP1/UBC/RHOA/UBE2D1/VCP/TNIP2/TRIM25/IFIH1/TRAF3	15
R-HSA-68886	M Phase	99/2093	395/10654	0.00426148	0.0158569	0.0100124	TUBA1B/PRKCB/ARPP19/VRK2/PSMA4/PSMA2/PSME2/PTTG1/DYNLL1/PSMB9/SET/TUBA1C/BANF1/PSMB2/TUBB4B/PSMA1/PSMB7/YWHAE/PSME1/ENSA/TUBB/PPP2R5C/PSMB6/OFD1/ANAPC11/H2BC12/PSMB8/PSMB10/PSMA7/PSMB1/H3-3A/H2AZ1/KIF2A/RPS27A/RPS27/UBA52/H3-3B/UBB/UBC/PSMA6/SEM1/RAB1A/PSMD8/PAFAH1B1/TUBA1A/LMNA/TUBB6/UBE2D1/PPP2CB/NUP58/NUP62/RB1/YWHAG/ANKLE2/H2AJ/NUP214/PPP2CA/TAOK1/UBE2E1/DYNC1LI1/RAB2A/CTDNEP1/SDCCAG8/DYNC1I2…	99
R-HSA-204998	Cell death signalling via NRAGE, NRIF and NADE	25/2093	76/10654	0.00431603	0.0160157	0.0101127	FGD2/YWHAE/FGD3/RPS27A/UBA52/UBB/RAC1/BEX3/UBC/PSENEN/AKAP13/ARHGEF1/ARHGEF10L/PSEN1/VAV1/SQSTM1/ABR/GNA13/PREX1/NCSTN/ARHGEF2/ARHGEF3/BCL2L11/MAPK8/CASP3	25
R-HSA-432720	Lysosome Vesicle Biogenesis	14/2093	35/10654	0.00438168	0.0162146	0.0102383	VAMP8/BLOC1S1/ARF1/VAMP2/CTSZ/GNS/AP1S2/ARRB1/CLTC/APP/M6PR/CLTA/HSPA8/CHMP2A	14
R-HSA-198725	Nuclear Events (kinase and transcription factor activation)	11/2093	25/10654	0.00476675	0.0175432	0.0110772	MEF2C/DUSP6/DUSP3/PPP2CB/MAPKAPK2/PPP2CA/RPS6KA1/MEF2A/RPS6KA3/DUSP4/MAPK1	11
R-HSA-429947	Deadenylation of mRNA	11/2093	25/10654	0.00476675	0.0175432	0.0110772	PABPC1/EIF4E/EIF4A1/EIF4A2/EIF4B/TUT7/TUT4/CNOT4/EIF4G1/PAN3/CNOT7	11
R-HSA-381042	PERK regulates gene expression	13/2093	32/10654	0.00510193	0.0187256	0.0118238	HERPUD1/EIF2S2/ATF4/HSPA5/CXCL8/DDIT3/CCL2/CEBPB/ATF3/DCP2/EIF2S3/EXOSC8/CEBPG	13
R-HSA-9009391	Extra-nuclear estrogen signaling	25/2093	77/10654	0.00522335	0.0191192	0.0120723	GNG7/ZDHHC21/PRMT1/BCL2/GNG5/CALM2/PIK3R1/CALM1/GNG2/GNAI2/GNB1/EREG/MMP9/SRC/FOS/GNB4/SPHK1/GNB2/NRAS/FOXO3/MAPK1/KRAS/CALM3/XPO1/HSP90AA1	25
R-HSA-198753	ERK/MAPK targets	10/2093	22/10654	0.00532856	0.0193466	0.0122159	MEF2C/DUSP6/DUSP3/PPP2CB/PPP2CA/RPS6KA1/MEF2A/RPS6KA3/DUSP4/MAPK1	10
R-HSA-2979096	NOTCH2 Activation and Transmission of Signal to the Nucleus	10/2093	22/10654	0.00532856	0.0193466	0.0122159	RPS27A/UBA52/UBB/UBC/PSENEN/NOTCH2/PSEN1/ADAM10/NCSTN/DLL4	10
R-HSA-9609523	Insertion of tail-anchored proteins into the endoplasmic reticulum membrane	10/2093	22/10654	0.00532856	0.0193466	0.0122159	SEC61B/SEC61G/VAMP2/HMOX1/APP/CAMLG/STX5/PRNP/EMD/CYB5A	10
R-HSA-8848021	Signaling by PTK6	19/2093	54/10654	0.00537279	0.0194025	0.0122512	PTPN1/CDK4/RPS27A/UBA52/UBB/RAC1/UBC/RHOA/HIF1A/STAT3/GPNMB/EREG/SOCS3/LRRK2/ARAP1/NRAS/KHDRBS1/SFPQ/KRAS	19
R-HSA-9006927	Signaling by Non-Receptor Tyrosine Kinases	19/2093	54/10654	0.00537279	0.0194025	0.0122512	PTPN1/CDK4/RPS27A/UBA52/UBB/RAC1/UBC/RHOA/HIF1A/STAT3/GPNMB/EREG/SOCS3/LRRK2/ARAP1/NRAS/KHDRBS1/SFPQ/KRAS	19
R-HSA-69481	G2/M Checkpoints	47/2093	168/10654	0.0054398	0.019592	0.0123708	MCM5/PSMA4/PSMA2/PSME2/UBE2N/PSMB9/RPA3/PSMB2/YWHAZ/PSMA1/PSMB7/YWHAE/PSME1/PSMB6/H2BC12/PSMB8/PSMB10/PSMA7/PSMB1/ATM/RPS27A/UBA52/UBB/NBN/UBC/PSMA6/YWHAQ/SEM1/PSMD8/SUMO1/YWHAG/H4C3/RPA2/RAD9A/PSMC4/PSMA5/PSMC1/PSMB5/PSMD1/PSMD7/PSMB4/PSMA3/PSMD11/PSMD4/PSMD2/PSMD14/YWHAB	47
R-HSA-5696395	Formation of Incision Complex in GG-NER	16/2093	43/10654	0.00555208	0.0199431	0.0125925	PARP1/UBE2N/RPA3/RBX1/RAD23A/RPS27A/UBA52/UBB/UBC/SUMO1/RAD23B/SUMO3/RPA2/MNAT1/UBE2I/SUMO2	16
R-HSA-110056	MAPK3 (ERK1) activation	6/2093	10/10654	0.0057806	0.0205448	0.0129724	JAK1/IL6/MAP2K1/JAK2/IL6ST/IL6R	6
R-HSA-381183	ATF6 (ATF6-alpha) activates chaperone genes	6/2093	10/10654	0.0057806	0.0205448	0.0129724	ATF4/HSPA5/CALR/XBP1/HSP90B1/DDIT3	6
R-HSA-9020958	Interleukin-21 signaling	6/2093	10/10654	0.0057806	0.0205448	0.0129724	STAT4/IL2RG/JAK1/STAT3/STAT5A/STAT1	6
R-HSA-937042	IRAK2 mediated activation of TAK1 complex	6/2093	10/10654	0.0057806	0.0205448	0.0129724	RPS27A/UBA52/UBB/UBC/IRAK2/TAB2	6
R-HSA-1236382	Constitutive Signaling by Ligand-Responsive EGFR Cancer Variants	9/2093	19/10654	0.00584216	0.0205467	0.0129737	GRB2/PIK3R1/RPS27A/UBA52/UBB/UBC/NRAS/KRAS/HSP90AA1	9
R-HSA-5637815	Signaling by Ligand-Responsive EGFR Variants in Cancer	9/2093	19/10654	0.00584216	0.0205467	0.0129737	GRB2/PIK3R1/RPS27A/UBA52/UBB/UBC/NRAS/KRAS/HSP90AA1	9
R-HSA-5686938	Regulation of TLR by endogenous ligand	9/2093	19/10654	0.00584216	0.0205467	0.0129737	LY96/HMGB1/S100A9/S100A8/CD14/CD36/TLR2/TLR4/TLR1	9
R-HSA-8876725	Protein methylation	9/2093	19/10654	0.00584216	0.0205467	0.0129737	CALM2/EEF2/RPS2/CALM1/EEF1A1/HSPA8/VCP/KIN/CALM3	9
R-HSA-110312	Translesion synthesis by REV1	8/2093	16/10654	0.00621477	0.0216513	0.0136711	RPA3/RPS27A/UBA52/UBB/UBC/RFC1/RPA2/MAD2L2	8
R-HSA-3322077	Glycogen synthesis	8/2093	16/10654	0.00621477	0.0216513	0.0136711	UGP2/RPS27A/UBA52/UBB/UBC/GBE1/PGM1/GYS1	8
R-HSA-2559583	Cellular Senescence	53/2093	195/10654	0.00626124	0.0216513	0.0136711	HMGA1/CDK4/ANAPC11/H2BC12/H3-3A/H2AZ1/ATM/TXN/RPS27A/UBA52/H3-3B/UBB/NFKB1/CDKN1A/CXCL8/NBN/UBC/STAT3/IL6/IL1A/CEBPB/ETS2/FOS/H1-0/MAP2K3/UBE2D1/JUN/RB1/KDM6B/MAPKAPK2/H2AJ/RPS6KA1/MAPKAPK3/UBE2E1/RELA/TNRC6B/MAP4K4/RPS6KA3/H4C3/ANAPC16/MAPK1/ETS1/TINF2/RBBP4/MAP2K7/EZH2/CDK6/LMNB1/MAPK8/MINK1/CBX6/H2AZ2/H1-2	53
R-HSA-1679131	Trafficking and processing of endosomal TLR	7/2093	13/10654	0.00628482	0.0216513	0.0136711	CTSS/HSP90B1/CTSB/CTSL/TLR8/CNPY3/LGMN	7
R-HSA-203615	eNOS activation	7/2093	13/10654	0.00628482	0.0216513	0.0136711	ZDHHC21/DDAH2/LYPLA1/CALM2/CALM1/CALM3/HSP90AA1	7
R-HSA-2995383	Initiation of Nuclear Envelope Reformation	7/2093	13/10654	0.00628482	0.0216513	0.0136711	VRK2/BANF1/LMNA/ANKLE2/PPP2CA/LMNB1/EMD	7
R-HSA-2995410	Nuclear Envelope Reassembly	7/2093	13/10654	0.00628482	0.0216513	0.0136711	VRK2/BANF1/LMNA/ANKLE2/PPP2CA/LMNB1/EMD	7
R-HSA-879415	Advanced glycosylation endproduct receptor signaling	7/2093	13/10654	0.00628482	0.0216513	0.0136711	CAPZA1/LGALS3/HMGB1/S100A12/APP/CAPZA2/MAPK1	7
R-HSA-445355	Smooth Muscle Contraction	15/2093	40/10654	0.00658251	0.022619	0.0142821	ANXA1/MYL6B/ANXA2/CALM2/TPM3/CALM1/MYL12A/MYL6/TLN1/TPM4/ANXA6/MYL12B/PAK1/PAK2/CALM3	15
R-HSA-1655829	Regulation of cholesterol biosynthesis by SREBP (SREBF)	19/2093	55/10654	0.00672731	0.022941	0.0144855	SQLE/RAN/FDFT1/IDI1/INSIG2/CHD9/MTF1/INSIG1/RXRA/LSS/SEC24A/SEC24D/HMGCS1/NCOA1/FDPS/HELZ2/SCD/MVD/PPARA	19
R-HSA-6799198	Complex I biogenesis	19/2093	55/10654	0.00672731	0.022941	0.0144855	ND4/ND1/ND5/ND2/ND3/NDUFAB1/NDUFB2/NDUFB7/NDUFS6/NDUFA13/NDUFV2/NDUFA1/NDUFA2/NDUFV3/NDUFS5/NDUFA6/NDUFS4/NDUFA9/NDUFA11	19
R-HSA-9639288	Amino acids regulate mTORC1	19/2093	55/10654	0.00672731	0.022941	0.0144855	LAMTOR5/ATP6V0E1/ATP6V0D1/LAMTOR1/ATP6V0B/ATP6V1F/FNIP2/ATP6V1B2/ATP6V1A/RHEB/TCIRG1/ATP6V1C1/RRAGC/ATP6V1D/ATP6V1E1/LAMTOR3/LAMTOR2/LAMTOR4/ATP6V1G1	19
R-HSA-1980145	Signaling by NOTCH2	13/2093	33/10654	0.00692988	0.0235721	0.014884	GZMB/RPS27A/UBA52/UBB/UBC/PSENEN/RBPJ/NOTCH2/PSEN1/ADAM10/NCSTN/MAML2/DLL4	13
R-HSA-8866654	E3 ubiquitin ligases ubiquitinate target proteins	20/2093	59/10654	0.00698297	0.0236929	0.0149602	UBE2N/H2BC12/RPS27A/HLA-A/UBA52/UBB/SELENOS/RNF181/UBC/UBE2A/UBE2L3/UBE2D1/VCP/UBE2E1/PEX2/DERL1/UBE2D3/RTF1/CDC73/UBE2B	20
R-HSA-8852135	Protein ubiquitination	25/2093	79/10654	0.00751607	0.0254375	0.0160618	UBE2N/H2BC12/RPS27A/HLA-A/UBA52/UBB/SELENOS/RNF181/UBC/UBE2A/UBE2Z/UBE2L3/UBE2D1/UBE2R2/VCP/UBE2E1/PEX2/DERL1/UBE2D3/RTF1/USP9X/CDC73/UBA6/UBE2K/UBE2B	25
R-HSA-72165	mRNA Splicing - Minor Pathway	18/2093	52/10654	0.00803782	0.0271352	0.0171338	SNRNP25/SNRPB/SNRPD1/SNRPG/SNRPE/YBX1/SNU13/SNRPF/SF3B6/POLR2K/SF3B5/POLR2L/SNRPD2/POLR2E/SRSF7/POLR2C/POLR2H/SF3B2	18
R-HSA-114452	Activation of BH3-only proteins	12/2093	30/10654	0.00812612	0.0272965	0.0172356	PMAIP1/BCL2/DYNLL1/YWHAZ/YWHAE/BID/YWHAQ/YWHAG/BMF/BCL2L11/MAPK8/YWHAB	12
R-HSA-418360	Platelet calcium homeostasis	12/2093	30/10654	0.00812612	0.0272965	0.0172356	ORAI2/ATP2B1/SRI/CALM2/CALM1/P2RX4/SLC8A1/P2RX7/ATP2A2/ITPR2/ATP2B4/CALM3	12
R-HSA-983168	Antigen processing: Ubiquitination & Proteasome degradation	78/2093	309/10654	0.00864554	0.028969	0.0182917	PSMA4/PSMA2/PSME2/UBE2N/PSMB9/UBE2J1/PSMB2/UBE2L6/PSMA1/RBX1/PSMB7/PSME1/PSMB6/ANAPC11/DTX3L/PSMB8/PSMB10/PSMA7/PSMB1/RNF213/RPS27A/UBA52/UBB/UBE2F/RNF19A/UBC/UBE2A/PSMA6/UBE2Z/SEM1/ELOB/PSMD8/UBE2L3/CBLB/WSB1/RNF19B/SOCS3/RNF144B/RNF130/UBE2D1/ATG7/UBE2E2/ZNRF2/SIAH2/CUL1/UBE2R2/FBXW5/UBR4/UBE2E1/TRIP12/FBXL5/ELOC/SKP1/RBCK1/ZBTB16/HUWE1/PSMC4/PJA2/PSMA5/LNPEP/UBE2D3/PSMC1/MGRN1/PSMB5/UBE3A/RNF1…	78
R-HSA-1268020	Mitochondrial protein import	21/2093	64/10654	0.00875354	0.0291099	0.0183807	SLC25A6/ATP5MC1/COX17/TIMM13/ACO2/TIMM10/COA4/ATP5F1B/TOMM22/TOMM7/TOMM5/HSPD1/VDAC1/CHCHD2/TIMM17A/TOMM20/TIMM8B/TIMM17B/ATP5F1A/HSPA9/DNAJC19	21
R-HSA-167044	Signalling to RAS	9/2093	20/10654	0.00879565	0.0291099	0.0183807	GRB2/RALGDS/RALA/SRC/NRAS/MAPKAPK2/RALB/MAPKAPK3/KRAS	9
R-HSA-168927	TICAM1, RIP1-mediated IKK complex recruitment	9/2093	20/10654	0.00879565	0.0291099	0.0183807	UBE2N/RPS27A/UBA52/UBB/UBC/BIRC3/UBE2D1/BIRC2/UBE2D3	9
R-HSA-2028269	Signaling by Hippo	9/2093	20/10654	0.00879565	0.0291099	0.0183807	MOB1A/YWHAE/TJP2/SAV1/STK3/STK4/MOB1B/CASP3/YWHAB	9
R-HSA-5625900	RHO GTPases activate CIT	9/2093	20/10654	0.00879565	0.0291099	0.0183807	MYL12A/RHOC/MYL6/RAC1/RHOA/MYH9/PPP1R12A/MYL12B/PPP1CB	9
R-HSA-2565942	Regulation of PLK1 Activity at G2/M Transition	27/2093	88/10654	0.0088194	0.029117	0.0183851	DYNLL1/TUBB4B/YWHAE/TUBB/OFD1/RPS27A/UBA52/UBB/UBC/PAFAH1B1/RAB8A/PPP1R12A/TUBA1A/YWHAG/PPP1CB/CUL1/SDCCAG8/DYNC1I2/OPTN/SKP1/AKAP9/CSNK1D/CEP135/MAPRE1/SSNA1/NDE1/HSP90AA1	27
R-HSA-5357769	Caspase activation via extrinsic apoptotic signalling pathway	11/2093	27/10654	0.00949678	0.0312767	0.0197488	APPL1/FASLG/CFLAR/LY96/TNFSF10/CD14/TLR4/CASP8/DAPK1/CASP3/FAS	11
R-HSA-177929	Signaling by EGFR	17/2093	49/10654	0.00961168	0.0315779	0.019939	GRB2/PIK3R1/RPS27A/UBA52/UBB/UBC/ADAM17/EPS15/CDC42/EREG/PTPN12/SRC/ADAM10/NRAS/PAG1/SH3KBP1/KRAS	17
R-HSA-140534	Caspase activation via Death Receptors in the presence of ligand	8/2093	17/10654	0.00974243	0.0316982	0.020015	FASLG/CFLAR/LY96/TNFSF10/CD14/TLR4/CASP8/FAS	8
R-HSA-202131	Metabolism of nitric oxide: eNOS activation and regulation	8/2093	17/10654	0.00974243	0.0316982	0.020015	ZDHHC21/DDAH2/LYPLA1/CALM2/CALM1/NOSIP/CALM3/HSP90AA1	8
R-HSA-5655862	Translesion synthesis by POLK	8/2093	17/10654	0.00974243	0.0316982	0.020015	RPA3/RPS27A/UBA52/UBB/UBC/RFC1/RPA2/MAD2L2	8
R-HSA-5656121	Translesion synthesis by POLI	8/2093	17/10654	0.00974243	0.0316982	0.020015	RPA3/RPS27A/UBA52/UBB/UBC/RFC1/RPA2/MAD2L2	8
R-HSA-3371556	Cellular response to heat stress	27/2093	89/10654	0.0103477	0.0335865	0.0212073	HSP90AB1/RPA3/YWHAE/HSBP1/ATM/EEF1A1/HSPA5/DNAJB1/DNAJB6/RPS19BP1/NUP58/NUP62/MAPKAPK2/AKT1S1/HSPA13/NUP214/HSPA8/VCP/HSPA9/TPR/RPA2/MAPK1/ST13/NUP98/HSPA1A/DNAJC7/HSP90AA1	27
R-HSA-174490	Membrane binding and targetting of GAG proteins	7/2093	14/10654	0.01046	0.033653	0.0212493	RPS27A/UBA52/UBB/UBC/NMT2/VPS37B/TSG101	7
R-HSA-174495	Synthesis And Processing Of GAG, GAGPOL Polyproteins	7/2093	14/10654	0.01046	0.033653	0.0212493	RPS27A/UBA52/UBB/UBC/NMT2/VPS37B/TSG101	7
R-HSA-71240	Tryptophan catabolism	7/2093	14/10654	0.01046	0.033653	0.0212493	KYNU/IDO1/KMO/SLC7A5/SLC36A4/SLC3A2/IDO2	7
R-HSA-8873719	RAB geranylgeranylation	21/2093	65/10654	0.0105933	0.033653	0.0212493	RAB30/RAB31/RAB29/RAB13/RAB27A/RAB8B/RAB10/RAB9A/PTP4A2/RAB1A/RAB8A/RAB7A/RAB20/RAB21/RAB34/RAB2A/RAB5C/RAB5A/RAB5B/RAB4B/RAB11A	21
R-HSA-193692	Regulated proteolysis of p75NTR	6/2093	11/10654	0.0106181	0.033653	0.0212493	NFKB1/ADAM17/PSENEN/PSEN1/NCSTN/RELA	6
R-HSA-196025	Formation of annular gap junctions	6/2093	11/10654	0.0106181	0.033653	0.0212493	ACTB/ACTG1/DAB2/CLTC/CLTA/AP2M1	6
R-HSA-2025928	Calcineurin activates NFAT	6/2093	11/10654	0.0106181	0.033653	0.0212493	PPIA/FKBP1A/CALM2/CALM1/NFATC2/CALM3	6
R-HSA-4755510	SUMOylation of immune response proteins	6/2093	11/10654	0.0106181	0.033653	0.0212493	NFKBIA/NFKB2/SUMO1/SUMO3/RELA/UBE2I	6
R-HSA-5625970	RHO GTPases activate KTN1	6/2093	11/10654	0.0106181	0.033653	0.0212493	RAC1/RHOA/CDC42/RHOG/KIF5B/KTN1	6
R-HSA-9013700	NOTCH4 Activation and Transmission of Signal to the Nucleus	6/2093	11/10654	0.0106181	0.033653	0.0212493	YWHAZ/PSENEN/PSEN1/ADAM10/NCSTN/DLL4	6
R-HSA-933542	TRAF6 mediated NF-kB activation	10/2093	24/10654	0.0110449	0.0349238	0.0220517	NFKB1/NFKBIA/HMGB1/NFKB2/S100A12/APP/MAP3K1/TRIM25/RELA/IFIH1	10
R-HSA-8856825	Cargo recognition for clathrin-mediated endocytosis	31/2093	106/10654	0.0111325	0.0351182	0.0221744	CD3D/IL7R/GRB2/CD3G/AAK1/ARRB2/RPS27A/UBA52/UBB/VAMP8/TFRC/UBC/EPS15/AP2S1/VAMP2/EREG/DAB2/SCARB2/PICALM/ARRB1/IGF2R/CLTC/GRK3/VAMP3/M6PR/CLTA/UBQLN1/ITSN2/COPS6/SH3KBP1/AP2M1	31
R-HSA-8854214	TBC/RABGAPs	16/2093	46/10654	0.0115044	0.0362067	0.0228617	RAB8B/ARF6/GGA1/RAB8A/RAB7A/GABARAP/TBC1D10C/MAP1LC3B/RAB5C/OPTN/RAB5A/GABARAPL2/TBC1D13/RAB5B/TBC1D17/RAB11A	16
R-HSA-389513	CTLA4 inhibitory signaling	9/2093	21/10654	0.0127535	0.0398582	0.0251674	CD86/LYN/LCK/FYN/PPP2R5C/SRC/CD80/PPP2CB/PPP2CA	9
R-HSA-6807004	Negative regulation of MET activity	9/2093	21/10654	0.0127535	0.0398582	0.0251674	GRB2/PTPN1/RPS27A/UBA52/UBB/UBC/EPS15/PTPN2/SH3KBP1	9
R-HSA-901032	ER Quality Control Compartment (ERQC)	9/2093	21/10654	0.0127535	0.0398582	0.0251674	RPS27A/UBA52/UBB/UBC/OS9/DERL2/SEL1L/EDEM1/RNF5	9
R-HSA-110313	Translesion synthesis by Y family DNA polymerases bypasses lesions on DNA template	14/2093	39/10654	0.0130515	0.0406954	0.025696	POLD2/RPA3/POLD4/UBE2L6/RPS27A/UBA52/UBB/UBC/ISG15/VCP/TRIM25/RFC1/RPA2/MAD2L2	14
R-HSA-8856688	Golgi-to-ER retrograde transport	37/2093	133/10654	0.013811	0.042964	0.0271284	TUBA1B/DYNLL1/GALNT2/TUBA1C/TUBB4B/CAPZA1/COPE/KIF2A/TMED9/TMED10/ARF1/ARFGAP3/SURF4/COPA/RAB1A/TMED2/PAFAH1B1/TUBA1A/TUBB6/TMED7/KDELR2/KIF1B/ARF3/KIF5B/CAPZA2/DYNC1LI1/ARF4/ARCN1/DYNC1I2/COPB2/COPZ1/ARFGAP2/TUBB2A/AGPAT3/KIF3B/NAPA/CAPZB	37
R-HSA-5656169	Termination of translesion DNA synthesis	12/2093	32/10654	0.0144323	0.0447933	0.0282835	POLD2/RPA3/POLD4/UBE2L6/RPS27A/UBA52/UBB/UBC/ISG15/TRIM25/RFC1/RPA2	12
R-HSA-3371497	HSP90 chaperone cycle for steroid hormone receptors (SHR)	18/2093	55/10654	0.0149996	0.046447	0.0293277	TUBA1B/HSP90AB1/DYNLL1/TUBA1C/DNAJA1/TUBB4B/CAPZA1/DNAJB1/TUBA1A/TUBB6/HSPA8/CAPZA2/DYNC1LI1/DYNC1I2/TUBB2A/HSPA1A/CAPZB/HSP90AA1	18
R-HSA-1643713	Signaling by EGFR in Cancer	10/2093	25/10654	0.0152304	0.046732	0.0295076	GRB2/PIK3R1/RPS27A/UBA52/UBB/UBC/EREG/NRAS/KRAS/HSP90AA1	10
R-HSA-191273	Cholesterol biosynthesis	10/2093	25/10654	0.0152304	0.046732	0.0295076	SQLE/FDFT1/IDI1/LSS/HMGCS1/FDPS/DHCR24/MSMO1/ACAT2/MVD	10
R-HSA-389960	Formation of tubulin folding intermediates by CCT/TriC	10/2093	25/10654	0.0152304	0.046732	0.0295076	TUBA1B/CCT5/TUBA1C/CCT6A/TUBB4B/CCT3/TUBA1A/TUBB6/TUBB2A/CCT7	10
R-HSA-9013507	NOTCH3 Activation and Transmission of Signal to the Nucleus	10/2093	25/10654	0.0152304	0.046732	0.0295076	YBX1/RPS27A/UBA52/UBB/UBC/PSENEN/PSEN1/ADAM10/NCSTN/DLL4	10
R-HSA-111447	Activation of BAD and translocation to mitochondria	7/2093	15/10654	0.0163342	0.0493322	0.0311495	BCL2/YWHAZ/YWHAE/BID/YWHAQ/YWHAG/YWHAB	7
R-HSA-2691230	Signaling by NOTCH1 HD Domain Mutants in Cancer	7/2093	15/10654	0.0163342	0.0493322	0.0311495	RPS27A/UBA52/UBB/UBC/ADAM17/ADAM10/DLL4	7
R-HSA-2691232	Constitutive Signaling by NOTCH1 HD Domain Mutants	7/2093	15/10654	0.0163342	0.0493322	0.0311495	RPS27A/UBA52/UBB/UBC/ADAM17/ADAM10/DLL4	7
R-HSA-4419969	Depolymerisation of the Nuclear Lamina	7/2093	15/10654	0.0163342	0.0493322	0.0311495	PRKCB/LMNA/CTDNEP1/LPIN2/LPIN1/LMNB1/EMD	7
R-HSA-8875360	InlB-mediated entry of Listeria monocytogenes into host cell	7/2093	15/10654	0.0163342	0.0493322	0.0311495	GRB2/RPS27A/UBA52/UBB/UBC/EPS15/SH3KBP1	7
R-HSA-937039	IRAK1 recruits IKK complex	7/2093	15/10654	0.0163342	0.0493322	0.0311495	UBE2N/RPS27A/UBA52/UBB/UBC/PELI1/IRAK1	7
R-HSA-975144	IRAK1 recruits IKK complex upon TLR7/8 or 9 stimulation	7/2093	15/10654	0.0163342	0.0493322	0.0311495	UBE2N/RPS27A/UBA52/UBB/UBC/PELI1/IRAK1	7
R-HSA-162587	HIV Life Cycle	41/2093	152/10654	0.0168689	0.0508331	0.0320972	RAN/TCEA1/HMGA1/PPIA/BANF1/GTF2A2/TAF7/RPS27A/UBA52/UBB/UBC/FURIN/POLR2K/ELOB/POLR2L/CHMP4A/CCR5/CHMP4B/NUP58/NUP62/ELL/NUP214/TAF13/CHMP2A/ELOC/CHMP5/POLR2E/CXCR4/RNMT/TPR/NMT2/POLR2C/VPS37B/POLR2H/MNAT1/NUP98/ELOA/TSG101/NMT1/XRCC6/XPO1	41
R-HSA-162588	Budding and maturation of HIV virion	11/2093	29/10654	0.0171986	0.0513669	0.0324342	PPIA/RPS27A/UBA52/UBB/UBC/CHMP4A/CHMP4B/CHMP2A/CHMP5/VPS37B/TSG101	11
R-HSA-186763	Downstream signal transduction	11/2093	29/10654	0.0171986	0.0513669	0.0324342	GRB2/STAT6/PIK3R1/RAPGEF1/STAT3/SRC/PIK3CB/NRAS/STAT5A/KRAS/STAT1	11
R-HSA-5218920	VEGFR2 mediated vascular permeability	11/2093	29/10654	0.0171986	0.0513669	0.0324342	CALM2/CALM1/RAC1/CTNNA1/CTNND1/CTNNB1/PAK1/VAV1/PAK2/CALM3/HSP90AA1	11
R-HSA-9619483	Activation of AMPK downstream of NMDARs	11/2093	29/10654	0.0171986	0.0513669	0.0324342	TUBA1B/TUBA1C/TUBB4B/CALM2/CALM1/TUBA1A/TUBB6/PRKAG2/PRKAG1/TUBB2A/CALM3	11
R-HSA-73893	DNA Damage Bypass	16/2093	48/10654	0.0176811	0.0521969	0.0329583	POLD2/RPA3/POLD4/UBE2L6/RBX1/RPS27A/UBA52/UBB/UBC/ISG15/VCP/TRIM25/RFC1/RPA2/MAD2L2/UBE2B	16
R-HSA-1474151	Tetrahydrobiopterin (BH4) synthesis, recycling, salvage and regulation	6/2093	12/10654	0.0177477	0.0521969	0.0329583	CALM2/CALM1/GCH1/GCHFR/CALM3/HSP90AA1	6
R-HSA-190873	Gap junction degradation	6/2093	12/10654	0.0177477	0.0521969	0.0329583	ACTB/ACTG1/DAB2/CLTC/CLTA/AP2M1	6
R-HSA-210990	PECAM1 interactions	6/2093	12/10654	0.0177477	0.0521969	0.0329583	LYN/LCK/PTPN6/FYN/SRC/ITGAV	6
R-HSA-381033	ATF6 (ATF6-alpha) activates chaperones	6/2093	12/10654	0.0177477	0.0521969	0.0329583	ATF4/HSPA5/CALR/XBP1/HSP90B1/DDIT3	6
R-HSA-4641265	Repression of WNT target genes	6/2093	12/10654	0.0177477	0.0521969	0.0329583	TCF7/LEF1/TLE5/TCF7L2/TLE4/TLE3	6
R-HSA-9027276	Erythropoietin activates Phosphoinositide-3-kinase (PI3K)	6/2093	12/10654	0.0177477	0.0521969	0.0329583	LYN/PIK3R1/PIK3CB/IRS2/PIK3R5/JAK2	6
R-HSA-373760	L1CAM interactions	33/2093	119/10654	0.0201631	0.0591716	0.0373623	TUBA1B/EZR/ACTB/ACTG1/TUBA1C/TUBB4B/ANK3/RAC1/MSN/AP2S1/NUMB/SDCBP/TUBA1A/NRP2/DPYSL2/ALCAM/TUBB6/SRC/SHTN1/RDX/ITGAV/CLTC/MAP2K1/PAK1/CLTA/ITGA5/HSPA8/RPS6KA1/RPS6KA3/NCAM1/MAPK1/TUBB2A/AP2M1	33
R-HSA-8951664	Neddylation	59/2093	234/10654	0.020792	0.060738	0.0383513	DCUN1D5/PSMA4/PSMA2/PSME2/PSMB9/PSMB2/PSMA1/RBX1/PSMB7/PSME1/PSMB6/PSMB8/PSMB10/PSMA7/PSMB1/RPS27A/UBA52/UBB/UBE2F/COMMD6/UBC/HIF1A/PSMA6/SEM1/ELOB/PSMD8/WSB1/SOCS3/UBE2D1/WSB2/CUL1/FBXW5/FBXL5/ELOC/SKP1/NAE1/COPS6/ZBTB16/PSMC4/PSMA5/DDA1/UBE2D3/PSMC1/UBD/SOCS2/COMMD1/PSMB5/NUB1/DCAF6/PSMD1/PSMD7/COMMD7/PSMB4/FBXO6/PSMA3/PSMD11/PSMD4/PSMD2/PSMD14	59
R-HSA-110320	Translesion Synthesis by POLH	8/2093	19/10654	0.0209071	0.060738	0.0383513	RPA3/RPS27A/UBA52/UBB/UBC/VCP/RFC1/RPA2	8
R-HSA-392851	Prostacyclin signalling through prostacyclin receptor	8/2093	19/10654	0.0209071	0.060738	0.0383513	GNG7/GNG5/GNG2/GNB1/PTGIR/GNB4/GNB2/GNAS	8
R-HSA-416700	Other semaphorin interactions	8/2093	19/10654	0.0209071	0.060738	0.0383513	CD72/PTPRC/TYROBP/SEMA4A/PLXND1/PLXNC1/SEMA4D/SEMA7A	8
R-HSA-5654738	Signaling by FGFR2	22/2093	73/10654	0.0209224	0.060738	0.0383513	GRB2/HNRNPM/PIK3R1/HNRNPA1/RPS27A/UBA52/FGFBP2/UBB/UBC/POLR2K/POLR2L/SRC/PPP2CB/NRAS/PPP2CA/PTBP1/POLR2E/POLR2C/MAPK1/POLR2H/KRAS/HNRNPH1	22
R-HSA-3371453	Regulation of HSF1-mediated heat shock response	21/2093	69/10654	0.0212479	0.0615505	0.0388644	RPA3/YWHAE/ATM/HSPA5/DNAJB1/DNAJB6/RPS19BP1/NUP58/NUP62/MAPKAPK2/HSPA13/NUP214/HSPA8/HSPA9/TPR/RPA2/MAPK1/ST13/NUP98/HSPA1A/DNAJC7	21
R-HSA-9609507	Protein localization	43/2093	163/10654	0.0213638	0.0617533	0.0389924	SLC25A6/ATP5MC1/COX17/TIMM13/ACO2/TIMM10/COA4/ATP5F1B/TOMM22/TOMM7/TOMM5/HSPD1/ZFAND6/VDAC1/CHCHD2/SEC61B/RPS27A/UBA52/UBB/SEC61G/GSTK1/UBC/TIMM17A/TOMM20/TIMM8B/SCP2/VAMP2/HMOX1/HSD17B4/UBE2D1/APP/TIMM17B/ATP5F1A/HSPA9/DNAJC19/CAMLG/PEX2/STX5/PRNP/UBE2D3/EMD/USP9X/CYB5A	43
R-HSA-110314	Recognition of DNA damage by PCNA-containing replication complex	11/2093	30/10654	0.022451	0.064757	0.0408891	POLD2/RPA3/POLD4/RBX1/RPS27A/UBA52/UBB/UBC/RFC1/RPA2/UBE2B	11
R-HSA-6811434	COPI-dependent Golgi-to-ER retrograde traffic	28/2093	99/10654	0.023832	0.0685805	0.0433033	TUBA1B/TUBA1C/TUBB4B/COPE/KIF2A/TMED9/TMED10/ARF1/ARFGAP3/SURF4/COPA/RAB1A/TMED2/TUBA1A/TUBB6/TMED7/KDELR2/KIF1B/ARF3/KIF5B/ARF4/ARCN1/COPB2/COPZ1/ARFGAP2/TUBB2A/KIF3B/NAPA	28
R-HSA-74752	Signaling by Insulin receptor	23/2093	78/10654	0.0238784	0.0685805	0.0433033	GRB2/ATP6V0E1/ATP6V0D1/PIK3R1/FLT3LG/ATP6V0B/ATP6V1F/ATP6AP1/ATP6V1B2/ATP6V1A/GAB2/PIK3CB/ATP6V0A1/TCIRG1/ATP6V1C1/IRS2/NRAS/ATP6V1D/ATP6V1E1/ATP6V1G1/MAPK1/FLT3/KRAS	23
R-HSA-1433559	Regulation of KIT signaling	7/2093	16/10654	0.0242048	0.0689301	0.043524	LYN/GRB2/LCK/PTPN6/FYN/SRC/SH2B3	7
R-HSA-2173791	TGF-beta receptor signaling in EMT (epithelial to mesenchymal transition)	7/2093	16/10654	0.0242048	0.0689301	0.043524	FKBP1A/RPS27A/UBA52/UBB/UBC/RHOA/TGFBR1	7
R-HSA-3229121	Glycogen storage diseases	7/2093	16/10654	0.0242048	0.0689301	0.043524	RPS27A/UBA52/UBB/UBC/GAA/GBE1/GYS1	7
R-HSA-399954	Sema3A PAK dependent Axon repulsion	7/2093	16/10654	0.0242048	0.0689301	0.043524	HSP90AB1/FYN/CFL1/RAC1/PAK1/PAK2/HSP90AA1	7
R-HSA-428930	Thromboxane signalling through TP receptor	9/2093	23/10654	0.0243881	0.0693054	0.043761	GNG7/GNG5/GNG2/GNB1/GNB4/GNA15/GNAQ/GNB2/GNA13	9
R-HSA-2426168	Activation of gene expression by SREBF (SREBP)	14/2093	42/10654	0.0255705	0.0723602	0.0456899	SQLE/FDFT1/IDI1/CHD9/MTF1/RXRA/LSS/HMGCS1/NCOA1/FDPS/HELZ2/SCD/MVD/PPARA	14
R-HSA-3769402	Deactivation of the beta-catenin transactivating complex	14/2093	42/10654	0.0255705	0.0723602	0.0456899	TCF7/YWHAZ/LEF1/RPS27A/UBA52/UBB/UBC/TCF7L2/CTNNB1/XIAP/TLE4/SOX4/TLE3/XPO1	14
R-HSA-2644602	Signaling by NOTCH1 PEST Domain Mutants in Cancer	18/2093	58/10654	0.0259601	0.0726991	0.0459039	RBX1/RPS27A/UBA52/UBB/MYC/UBC/ADAM17/PSENEN/RBPJ/PSEN1/ADAM10/NCOR2/CUL1/NCSTN/MAML2/SKP1/DLL4/HDAC2	18
R-HSA-2644603	Signaling by NOTCH1 in Cancer	18/2093	58/10654	0.0259601	0.0726991	0.0459039	RBX1/RPS27A/UBA52/UBB/MYC/UBC/ADAM17/PSENEN/RBPJ/PSEN1/ADAM10/NCOR2/CUL1/NCSTN/MAML2/SKP1/DLL4/HDAC2	18
R-HSA-2644606	Constitutive Signaling by NOTCH1 PEST Domain Mutants	18/2093	58/10654	0.0259601	0.0726991	0.0459039	RBX1/RPS27A/UBA52/UBB/MYC/UBC/ADAM17/PSENEN/RBPJ/PSEN1/ADAM10/NCOR2/CUL1/NCSTN/MAML2/SKP1/DLL4/HDAC2	18
R-HSA-2894858	Signaling by NOTCH1 HD+PEST Domain Mutants in Cancer	18/2093	58/10654	0.0259601	0.0726991	0.0459039	RBX1/RPS27A/UBA52/UBB/MYC/UBC/ADAM17/PSENEN/RBPJ/PSEN1/ADAM10/NCOR2/CUL1/NCSTN/MAML2/SKP1/DLL4/HDAC2	18
R-HSA-2894862	Constitutive Signaling by NOTCH1 HD+PEST Domain Mutants	18/2093	58/10654	0.0259601	0.0726991	0.0459039	RBX1/RPS27A/UBA52/UBB/MYC/UBC/ADAM17/PSENEN/RBPJ/PSEN1/ADAM10/NCOR2/CUL1/NCSTN/MAML2/SKP1/DLL4/HDAC2	18
R-HSA-1227986	Signaling by ERBB2	16/2093	50/10654	0.0261277	0.0730167	0.0461044	GRB2/FYN/PIK3R1/RPS27A/UBA52/UBB/UBC/RHOA/EREG/PTPN12/SRC/ERBIN/NRAS/PTPN18/KRAS/HSP90AA1	16
R-HSA-380994	ATF4 activates genes in response to endoplasmic reticulum stress	10/2093	27/10654	0.0269543	0.0751706	0.0474644	HERPUD1/ATF4/CXCL8/DDIT3/CCL2/CEBPB/ATF3/DCP2/EXOSC8/CEBPG	10
R-HSA-202670	ERKs are inactivated	6/2093	13/10654	0.027573	0.0762646	0.0481552	DUSP6/DUSP3/PPP2CB/PPP2CA/DUSP4/MAPK1	6
R-HSA-2046104	alpha-linolenic (omega3) and linoleic (omega6) acid metabolism	6/2093	13/10654	0.027573	0.0762646	0.0481552	SCP2/ACSL1/HSD17B4/FADS2/FADS1/ELOVL1	6
R-HSA-2046106	alpha-linolenic acid (ALA) metabolism	6/2093	13/10654	0.027573	0.0762646	0.0481552	SCP2/ACSL1/HSD17B4/FADS2/FADS1/ELOVL1	6
R-HSA-5607763	CLEC7A (Dectin-1) induces NFAT activation	6/2093	13/10654	0.027573	0.0762646	0.0481552	CALM2/CALM1/AHCYL1/ITPR2/NFATC2/CALM3	6
R-HSA-201681	TCF dependent signaling in response to WNT	58/2093	233/10654	0.0277381	0.0765639	0.0483442	PSMA4/PSMA2/PSME2/PSMB9/TCF7/PSMB2/YWHAZ/PSMA1/RBX1/PSMB7/PSME1/PPP2R5C/LEF1/PSMB6/H2BC12/PSMB8/PSMB10/PSMA7/PSMB1/H3-3A/H2AZ1/RPS27A/UBA52/H3-3B/UBB/RUNX3/MYC/UBC/PSMA6/SEM1/PSMD8/PPP2CB/TCF7L2/CTNNB1/H2AJ/PPP2CA/TNKS2/XIAP/H4C3/TLE4/PSMC4/PSMA5/PSMC1/SOX4/PSMB5/TLE3/H2AZ2/PSMD1/PSMD7/CDC73/PSMB4/CSNK1A1/PSMA3/PSMD11/PSMD4/PSMD2/XPO1/PSMD14	58
R-HSA-8964616	G beta:gamma signalling through CDC42	8/2093	20/10654	0.0289814	0.0797373	0.0503479	GNG7/GNG5/GNG2/GNB1/CDC42/GNB4/GNB2/PAK1	8
R-HSA-70171	Glycolysis	21/2093	71/10654	0.0290061	0.0797373	0.0503479	PKM/TPI1/PGAM1/GAPDH/ALDOA/PGK1/BPGM/ENO1/HK2/PFKFB3/PPP2CB/NUP58/ADPGK/NUP62/NUP214/PPP2CA/PFKL/TPR/PRKACB/ALDOC/NUP98	21
R-HSA-5689880	Ub-specific processing proteases	55/2093	220/10654	0.0290883	0.0798003	0.0503877	SNX3/PSMA4/PSMA2/PSME2/PSMB9/PSMB2/PSMA1/PSMB7/PSME1/ADRM1/VDAC1/PSMB6/H2BC12/PSMB8/PSMB10/VDAC2/PSMA7/PSMB1/ARRB2/RPS27A/UBA52/UBB/NFKBIA/MYC/UBC/HIF1A/TOMM20/PSMA6/SEM1/PSMD8/TADA3/USP16/BIRC3/ARRB1/TGFBR1/SIAH2/USP12/BIRC2/TNKS2/USP18/PSMC4/PSMA5/CYLD/PSMC1/PSMB5/IFIH1/PSMD1/USP9X/PSMD7/PSMB4/PSMA3/PSMD11/PSMD4/PSMD2/PSMD14	55
R-HSA-418346	Platelet homeostasis	25/2093	88/10654	0.0298826	0.0818127	0.0516584	GNG7/ORAI2/ATP2B1/PTPN6/SRI/PPP2R5C/GNG5/CALM2/CALM1/GNG2/GNB1/P2RX4/FGR/SLC8A1/PTGIR/GNB4/P2RX7/PPP2CB/ATP2A2/GNB2/ITPR2/PPP2CA/GNAS/ATP2B4/CALM3	25
R-HSA-111367	SLBP independent Processing of Histone Pre-mRNAs	5/2093	10/10654	0.0304406	0.0828354	0.0523041	SNRPB/LSM10/SNRPG/SNRPE/SNRPF	5
R-HSA-390450	Folding of actin by CCT/TriC	5/2093	10/10654	0.0304406	0.0828354	0.0523041	ACTB/CCT5/CCT6A/CCT3/CCT7	5
R-HSA-8877330	RUNX1 and FOXP3 control the development of regulatory T lymphocytes (Tregs)	5/2093	10/10654	0.0304406	0.0828354	0.0523041	IFNG/IL2RA/RUNX1/TNFRSF18/NFATC2	5
R-HSA-2122947	NOTCH1 Intracellular Domain Regulates Transcription	15/2093	47/10654	0.0314097	0.0853001	0.0538604	RBX1/RPS27A/UBA52/UBB/MYC/UBC/HIF1A/RBPJ/NCOR2/CUL1/MAML2/SKP1/TLE4/TLE3/HDAC2	15
R-HSA-2559582	Senescence-Associated Secretory Phenotype (SASP)	30/2093	110/10654	0.0320734	0.0869272	0.0548878	CDK4/ANAPC11/H2BC12/H3-3A/H2AZ1/RPS27A/UBA52/H3-3B/UBB/NFKB1/CDKN1A/CXCL8/UBC/STAT3/IL6/IL1A/CEBPB/FOS/UBE2D1/JUN/H2AJ/RPS6KA1/UBE2E1/RELA/RPS6KA3/H4C3/ANAPC16/MAPK1/CDK6/H2AZ2	30
R-HSA-450513	Tristetraprolin (TTP, ZFP36) binds and destabilizes mRNA	7/2093	17/10654	0.0343285	0.0924811	0.0583947	MAPKAPK2/ZFP36/DCP2/EXOSC8/XRN1/TNPO1/YWHAB	7
R-HSA-8934593	Regulation of RUNX1 Expression and Activity	7/2093	17/10654	0.0343285	0.0924811	0.0583947	CCND3/CCND2/SRC/RUNX1/TNRC6B/CDK6/PML	7
R-HSA-9617828	FOXO-mediated transcription of cell cycle genes	7/2093	17/10654	0.0343285	0.0924811	0.0583947	CDKN1A/BTG1/RBL2/KLF4/FOXO3/CCNG2/GADD45A	7
R-HSA-2173789	TGF-beta receptor signaling activates SMADs	11/2093	32/10654	0.0363042	0.0972202	0.0613871	PPP1CA/PPP1R15A/FKBP1A/RPS27A/UBA52/UBB/UBC/FURIN/TGFBR1/PPP1CB/XPO1	11
R-HSA-392518	Signal amplification	11/2093	32/10654	0.0363042	0.0972202	0.0613871	GNG7/GNG5/GNG2/GNAI2/GNB1/SRC/GNB4/GNA15/GNAQ/GNB2/GNA13	11
R-HSA-397795	G-protein beta:gamma signalling	11/2093	32/10654	0.0363042	0.0972202	0.0613871	GNG7/BTK/GNG5/GNG2/RHOA/GNB1/CDC42/GNB4/PIK3R5/GNB2/PAK1	11
R-HSA-8939211	ESR-mediated signaling	55/2093	223/10654	0.0369319	0.098705	0.0623245	GNG7/ZDHHC21/CXXC5/PRMT1/BCL2/HSP90AB1/NCOA3/GTF2A2/GNG5/CALM2/H2BC12/PIK3R1/H3-3A/JUND/H2AZ1/CALM1/H3-3B/GNG2/CTSD/MYC/GNAI2/GNB1/POLR2K/POLR2L/DDX5/EREG/MMP9/SRC/FOS/GNB4/SPHK1/FOSB/RUNX1/JUN/GNB2/NRAS/FOXO3/H2AJ/USF2/TNRC6B/POLR2E/H4C3/POLR2C/MAPK1/POLR2H/NCOA1/STAG2/NRIP1/TLE3/H2AZ2/KRAS/CALM3/RAD21/XPO1/HSP90AA1	55
R-HSA-5688426	Deubiquitination	71/2093	297/10654	0.0382065	0.101909	0.0643478	SNX3/PSMA4/ACTB/PSMA2/PSME2/PSMB9/PSMB2/PSMA1/PSMB7/PSME1/RAD23A/ADRM1/VDAC1/PSMB6/H2BC12/PSMB8/PSMB10/VDAC2/PSMA7/PSMB1/ARRB2/RPS27A/UBA52/TNFAIP3/UBB/NFKBIA/TNIP3/MYC/RIPK2/TNIP1/UBC/RHOA/HIF1A/TOMM20/PSMA6/SEM1/PSMD8/TADA3/USP16/BIRC3/NLRP3/UBE2D1/ARRB1/TGFBR1/SIAH2/JOSD2/USP12/BIRC2/RAD23B/VCP/TNIP2/TNKS2/TRIM25/USP18/PSMC4/PSMA5/CYLD/PSMC1/PSMB5/JOSD1/IFIH1/PSMD1/USP9X/PSMD7/TRAF3/PSMB4/PSMA…	71
R-HSA-194840	Rho GTPase cycle	36/2093	138/10654	0.0385204	0.102543	0.0647483	ARHGAP24/FGD2/GDI2/RAC2/FGD3/RHOC/RAC1/ARHGAP15/RHOA/ARHGDIA/CDC42/TAGAP/ARAP2/AKAP13/RHOG/RHOF/ARHGAP30/ARHGDIB/ARHGEF1/ARHGAP25/RHOQ/RHOU/ARHGEF10L/TRIP10/ARHGAP31/ARAP1/VAV1/MYO9B/ABR/GNA13/ARHGAP18/PREX1/ARHGEF2/ARHGEF3/ARHGAP9/RALBP1	36
R-HSA-170834	Signaling by TGF-beta Receptor Complex	21/2093	73/10654	0.0387288	0.102895	0.0649702	PARP1/PPP1CA/SKIL/PPP1R15A/FKBP1A/RPS27A/UBA52/UBB/MYC/UBC/RHOA/FURIN/JUNB/UBE2D1/TGFBR1/NCOR2/PPP1CB/PPM1A/UBE2D3/USP9X/XPO1	21
R-HSA-1606322	ZBP1(DAI) mediated induction of type I IFNs	8/2093	21/10654	0.0389678	0.103123	0.0651142	NFKB1/NFKBIA/NFKB2/ZBP1/IRF3/TBK1/MYD88/RELA	8
R-HSA-416572	Sema4D induced cell migration and growth-cone collapse	8/2093	21/10654	0.0389678	0.103123	0.0651142	MYL12A/RHOC/MYL6/RHOA/MYH9/MYL12B/LIMK2/SEMA4D	8
R-HSA-162594	Early Phase of HIV Life Cycle	6/2093	14/10654	0.0404078	0.1061	0.0669939	HMGA1/PPIA/BANF1/CCR5/CXCR4/XRCC6	6
R-HSA-3371568	Attenuation phase	6/2093	14/10654	0.0404078	0.1061	0.0669939	HSP90AB1/HSBP1/DNAJB1/HSPA8/HSPA1A/HSP90AA1	6
R-HSA-442720	CREB1 phosphorylation through the activation of Adenylate Cyclase	6/2093	14/10654	0.0404078	0.1061	0.0669939	CALM2/CALM1/PRKAR1A/PRKAR2A/PRKACB/CALM3	6
R-HSA-918233	TRAF3-dependent IRF activation pathway	6/2093	14/10654	0.0404078	0.1061	0.0669939	IRF7/IRF3/TBK1/TRIM25/IFIH1/TRAF3	6
R-HSA-9614085	FOXO-mediated transcription	19/2093	65/10654	0.0410038	0.107455	0.0678498	YWHAZ/TXN/FASLG/CDKN1A/SOD2/YWHAQ/BTG1/DDIT3/RBL2/KLF4/CITED2/YWHAG/FOXO3/BCL6/CCNG2/GADD45A/BCL2L11/HDAC2/YWHAB	19
R-HSA-390466	Chaperonin-mediated protein folding	26/2093	95/10654	0.0420181	0.109132	0.0689082	GNG7/TUBA1B/ACTB/CCT5/PFDN6/TUBA1C/CCT6A/TUBB4B/GNG5/CCT3/PFDN2/PFDN5/GNG2/GNAI2/GNB1/TUBA1A/STAT3/TUBB6/GNB4/SPHK1/GNB2/FBXW5/FBXL5/TUBB2A/FBXO6/CCT7	26
R-HSA-210991	Basigin interactions	9/2093	25/10654	0.0420485	0.109132	0.0689082	PPIA/SPN/SLC16A3/BSG/SLC7A7/ATP1B3/SLC7A11/SLC7A5/SLC3A2	9
R-HSA-400685	Sema4D in semaphorin signaling	9/2093	25/10654	0.0420485	0.109132	0.0689082	MYL12A/RHOC/MYL6/RAC1/RHOA/MYH9/MYL12B/LIMK2/SEMA4D	9
R-HSA-418592	ADP signalling through P2Y purinoceptor 1	9/2093	25/10654	0.0420485	0.109132	0.0689082	GNG7/GNG5/GNG2/GNB1/SRC/GNB4/GNA15/GNAQ/GNB2	9
R-HSA-5696397	Gap-filling DNA repair synthesis and ligation in GG-NER	9/2093	25/10654	0.0420485	0.109132	0.0689082	POLD2/RPA3/POLD4/RPS27A/UBA52/UBB/UBC/RFC1/RPA2	9
R-HSA-6811442	Intra-Golgi and retrograde Golgi-to-ER traffic	50/2093	202/10654	0.0424061	0.109815	0.0693395	TUBA1B/RAB30/DYNLL1/GALNT2/TUBA1C/TUBB4B/CAPZA1/COPE/KIF2A/TMED9/TMED10/ARF1/ARFGAP3/RAB9A/SURF4/COPA/RAB1A/GOLGA4/TMED2/PAFAH1B1/CYTH4/TUBA1A/TUBB6/TMED7/IGF2R/KDELR2/KIF1B/VAMP3/CUX1/M6PR/ARF3/KIF5B/CAPZA2/PLIN3/DYNC1LI1/ARF4/ARCN1/DYNC1I2/COPB2/GCC2/COPZ1/STX5/ARFGAP2/TUBB2A/AGPAT3/KIF3B/CYTH2/CYTH1/NAPA/CAPZB	50
R-HSA-162599	Late Phase of HIV Life Cycle	36/2093	139/10654	0.0424747	0.109815	0.0693395	RAN/TCEA1/PPIA/GTF2A2/TAF7/RPS27A/UBA52/UBB/UBC/FURIN/POLR2K/ELOB/POLR2L/CHMP4A/CHMP4B/NUP58/NUP62/ELL/NUP214/TAF13/CHMP2A/ELOC/CHMP5/POLR2E/RNMT/TPR/NMT2/POLR2C/VPS37B/POLR2H/MNAT1/NUP98/ELOA/TSG101/NMT1/XPO1	36
R-HSA-1989781	PPARA activates gene expression	31/2093	117/10654	0.0429374	0.110798	0.0699604	ACADM/RORA/NCOA3/FDFT1/G0S2/PLIN2/GLIPR1/CHD9/ABCA1/ACSL1/CD36/RGL1/ARNT2/MTF1/TNFRSF21/RXRA/NR1H3/AHR/NCOR2/ALAS1/MED13L/MED13/HMGCS1/TXNRD1/THRAP3/MED10/NCOA1/HELZ2/FADS1/PPARA/MED28	31
R-HSA-380972	Energy dependent regulation of mTOR by LKB1-AMPK	10/2093	29/10654	0.0439904	0.113082	0.0714027	LAMTOR5/LAMTOR1/RHEB/RRAGC/PPM1A/PRKAG2/LAMTOR3/LAMTOR2/LAMTOR4/PRKAG1	10
R-HSA-5669034	TNFs bind their physiological receptors	10/2093	29/10654	0.0439904	0.113082	0.0714027	TNFRSF13B/CD70/TNFRSF1B/FASLG/CD27/TNFRSF4/TNFSF13B/TNFRSF18/TNFRSF9/TNFSF14	10
R-HSA-9012852	Signaling by NOTCH3	15/2093	49/10654	0.0447337	0.114774	0.0724708	YBX1/IKZF1/RPS27A/UBA52/UBB/UBC/PSENEN/RBPJ/PLXND1/PSEN1/ADAM10/NCSTN/MAML2/DLL4/STAT1	15
R-HSA-2559585	Oncogene Induced Senescence	11/2093	33/10654	0.0450966	0.115048	0.0726437	CDK4/RPS27A/UBA52/UBB/UBC/ETS2/RB1/TNRC6B/MAPK1/ETS1/CDK6	11
R-HSA-352230	Amino acid transport across the plasma membrane	11/2093	33/10654	0.0450966	0.115048	0.0726437	SLC43A2/SLC7A7/SLC7A11/SLC7A5/SLC6A6/SLC36A4/SLC38A2/SLC3A2/SLC38A1/SLC6A12/SLC7A1	11
R-HSA-5694530	Cargo concentration in the ER	11/2093	33/10654	0.0450966	0.115048	0.0726437	CTSC/TMED10/LMAN2/TMED2/SERPINA1/CTSZ/SEC24A/SEC24D/CD59/STX5/LMAN1	11
R-HSA-1912420	Pre-NOTCH Processing in Golgi	7/2093	18/10654	0.046906	0.117355	0.0741005	FURIN/TMED2/B4GALT1/NOTCH2/ATP2A2/SEL1L/MFNG	7
R-HSA-5676594	TNF receptor superfamily (TNFSF) members mediating non-canonical NF-kB pathway	7/2093	18/10654	0.046906	0.117355	0.0741005	CD40/LTB/TNFSF13B/BIRC3/BIRC2/TNFSF14/TRAF3	7
R-HSA-8964315	G beta:gamma signalling through BTK	7/2093	18/10654	0.046906	0.117355	0.0741005	GNG7/BTK/GNG5/GNG2/GNB1/GNB4/GNB2	7
R-HSA-2586552	Signaling by Leptin	5/2093	11/10654	0.0469594	0.117355	0.0741005	STAT3/SOCS3/IRS2/JAK2/STAT5A	5
R-HSA-3371378	Regulation by c-FLIP	5/2093	11/10654	0.0469594	0.117355	0.0741005	FASLG/CFLAR/TNFSF10/CASP8/FAS	5
R-HSA-5218900	CASP8 activity is inhibited	5/2093	11/10654	0.0469594	0.117355	0.0741005	FASLG/CFLAR/TNFSF10/CASP8/FAS	5
R-HSA-69416	Dimerization of procaspase-8	5/2093	11/10654	0.0469594	0.117355	0.0741005	FASLG/CFLAR/TNFSF10/CASP8/FAS	5
R-HSA-77588	SLBP Dependent Processing of Replication-Dependent Histone Pre-mRNAs	5/2093	11/10654	0.0469594	0.117355	0.0741005	SNRPB/LSM10/SNRPG/SNRPE/SNRPF	5
R-HSA-9014325	TICAM1,TRAF6-dependent induction of TAK1 complex	5/2093	11/10654	0.0469594	0.117355	0.0741005	RPS27A/UBA52/UBB/UBC/TAB2	5
R-HSA-9614399	Regulation of localization of FOXO transcription factors	5/2093	11/10654	0.0469594	0.117355	0.0741005	YWHAZ/YWHAQ/YWHAG/FOXO3/YWHAB	5
R-HSA-9645460	Alpha-protein kinase 1 signaling pathway	5/2093	11/10654	0.0469594	0.117355	0.0741005	RPS27A/UBA52/UBB/UBC/TAB2	5
R-HSA-1236394	Signaling by ERBB4	17/2093	58/10654	0.050174	0.125156	0.0790265	GRB2/PIK3R1/RPS27A/UBA52/UBB/UBC/ADAM17/PSENEN/EREG/SRC/PSEN1/NRAS/NCSTN/TAB2/STMN1/STAT5A/KRAS	17
R-HSA-391251	Protein folding	27/2093	101/10654	0.0507293	0.126307	0.0797534	GNG7/TUBA1B/ACTB/CCT5/PFDN6/TUBA1C/CCT6A/TUBB4B/GNG5/CCT3/PFDN2/PFDN5/GNG2/GNAI2/GNB1/TUBA1A/STAT3/TUBB6/GNB4/SPHK1/GNB2/FBXW5/FBXL5/TUBB2A/TBCB/FBXO6/CCT7	27
R-HSA-400206	Regulation of lipid metabolism by Peroxisome proliferator-activated receptor alpha (PPARalpha)	31/2093	119/10654	0.052734	0.131057	0.0827522	ACADM/RORA/NCOA3/FDFT1/G0S2/PLIN2/GLIPR1/CHD9/ABCA1/ACSL1/CD36/RGL1/ARNT2/MTF1/TNFRSF21/RXRA/NR1H3/AHR/NCOR2/ALAS1/MED13L/MED13/HMGCS1/TXNRD1/THRAP3/MED10/NCOA1/HELZ2/FADS1/PPARA/MED28	31
R-HSA-2173788	Downregulation of TGF-beta receptor signaling	9/2093	26/10654	0.0534626	0.132136	0.0834336	PPP1CA/PPP1R15A/RPS27A/UBA52/UBB/UBC/TGFBR1/PPP1CB/XPO1	9
R-HSA-425410	Metal ion SLC transporters	9/2093	26/10654	0.0534626	0.132136	0.0834336	SLC39A8/SLC11A1/SLC41A2/SLC11A2/SLC30A1/SLC31A1/SLC39A1/SLC30A7/SLC39A7	9
R-HSA-6803529	FGFR2 alternative splicing	9/2093	26/10654	0.0534626	0.132136	0.0834336	HNRNPM/HNRNPA1/POLR2K/POLR2L/PTBP1/POLR2E/POLR2C/POLR2H/HNRNPH1	9
R-HSA-69620	Cell Cycle Checkpoints	69/2093	293/10654	0.0537138	0.132514	0.0836722	MCM5/PSMA4/PSMA2/PSME2/UBE2N/DYNLL1/PSMB9/RPA3/PSMB2/YWHAZ/PSMA1/PSMB7/YWHAE/PSME1/PPP2R5C/PSMB6/ANAPC11/H2BC12/PSMB8/PSMB10/PSMA7/PSMB1/ATM/KIF2A/RPS27A/RPS27/UBA52/UBB/CDKN1A/NBN/UBC/PSMA6/YWHAQ/SEM1/PSMD8/PAFAH1B1/SUMO1/ZNF385A/UBE2D1/PPP2CB/YWHAG/PPP2CA/TAOK1/UBE2E1/DYNC1LI1/DYNC1I2/H4C3/ANAPC16/RPA2/MAD1L1/RAD9A/PSMC4/PSMA5/PSMC1/NUP98/PSMB5/MAPRE1/PSMD1/PSMD7/NDE1/PSMB4/PSMA3/CLIP1/PSMD11/P…	69
R-HSA-499943	Interconversion of nucleotide di- and triphosphates	10/2093	30/10654	0.0547601	0.134848	0.0851461	NME1/DCTPP1/AK2/AK6/TXN/AK4/GUK1/GLRX/TXNRD1/AK8	10
R-HSA-5099900	WNT5A-dependent internalization of FZD4	6/2093	15/10654	0.0564568	0.138773	0.0876241	PRKCB/ARRB2/AP2S1/CLTC/CLTA/AP2M1	6
R-HSA-5696398	Nucleotide Excision Repair	29/2093	111/10654	0.0575405	0.141179	0.0891434	PARP1/TCEA1/ACTB/UBE2N/POLD2/RPA3/POLD4/RBX1/RAD23A/RPS27A/UBA52/UBB/UBC/POLR2K/POLR2L/SUMO1/ELL/RAD23B/SUMO3/POLR2E/HMGN1/RFC1/COPS6/RPA2/POLR2C/POLR2H/MNAT1/UBE2I/SUMO2	29
R-HSA-3928665	EPH-ephrin mediated repulsion of cells	15/2093	51/10654	0.0616124	0.15062	0.0951052	LYN/ACTB/FYN/ACTG1/RAC1/AP2S1/PSENEN/MMP9/SRC/CLTC/PSEN1/ADAM10/CLTA/NCSTN/AP2M1	15
R-HSA-6811436	COPI-independent Golgi-to-ER retrograde traffic	15/2093	51/10654	0.0616124	0.15062	0.0951052	TUBA1B/DYNLL1/GALNT2/TUBA1C/TUBB4B/CAPZA1/PAFAH1B1/TUBA1A/TUBB6/CAPZA2/DYNC1LI1/DYNC1I2/TUBB2A/AGPAT3/CAPZB	15
R-HSA-190872	Transport of connexons to the plasma membrane	7/2093	19/10654	0.062072	0.151195	0.0954682	TUBA1B/TUBA1C/TUBB4B/TUBA1A/TUBB6/GJB2/TUBB2A	7
R-HSA-3928664	Ephrin signaling	7/2093	19/10654	0.062072	0.151195	0.0954682	FYN/MYL12A/RAC1/SDCBP/SRC/PAK1/PAK2	7
R-HSA-438064	Post NMDA receptor activation events	22/2093	81/10654	0.0623888	0.151693	0.0957822	TUBA1B/TUBA1C/TUBB4B/CALM2/CAMK4/CALM1/RAC1/PRKAR1A/TUBA1A/TUBB6/SRC/NRAS/RPS6KA1/PRKAG2/PRKAR2A/RPS6KA3/PRKACB/MAPK1/PRKAG1/TUBB2A/KRAS/CALM3	22
R-HSA-174048	APC/C:Cdc20 mediated degradation of Cyclin B	8/2093	23/10654	0.0652085	0.157978	0.099751	ANAPC11/RPS27A/UBA52/UBB/UBC/UBE2D1/UBE2E1/ANAPC16	8
R-HSA-8949215	Mitochondrial calcium ion transport	8/2093	23/10654	0.0652085	0.157978	0.099751	PHB/PHB2/STOML2/VDAC1/VDAC2/MICU1/YME1L1/SMDT1	8
R-HSA-1368108	BMAL1:CLOCK,NPAS2 activates circadian gene expression	9/2093	27/10654	0.0667167	0.161342	0.101875	BHLHE41/BHLHE40/NAMPT/CHD9/RXRA/NCOA1/HELZ2/ARNTL2/PPARA	9
R-HSA-182971	EGFR downregulation	10/2093	31/10654	0.0671289	0.162048	0.102321	GRB2/RPS27A/UBA52/UBB/UBC/EPS15/CDC42/EREG/PTPN12/SH3KBP1	10
R-HSA-73621	Pyrimidine catabolism	5/2093	12/10654	0.0678249	0.163143	0.103012	TYMP/NT5C3A/UPP1/DPYD/UPB1	5
R-HSA-8866427	VLDLR internalisation and degradation	5/2093	12/10654	0.0678249	0.163143	0.103012	AP2S1/NR1H3/CLTC/CLTA/AP2M1	5
R-HSA-2151201	Transcriptional activation of mitochondrial biogenesis	16/2093	56/10654	0.0691228	0.165969	0.104796	MEF2C/ATP5F1B/CYCS/CALM2/CAMK4/CALM1/SOD2/CHD9/RXRA/ALAS1/SSBP1/NCOA1/HELZ2/GABPB1/PPARA/CALM3	16
R-HSA-6782210	Gap-filling DNA repair synthesis and ligation in TC-NER	18/2093	65/10654	0.0733393	0.175779	0.110991	TCEA1/POLD2/RPA3/POLD4/RBX1/RPS27A/UBA52/UBB/UBC/POLR2K/POLR2L/POLR2E/HMGN1/RFC1/RPA2/POLR2C/POLR2H/MNAT1	18
R-HSA-190236	Signaling by FGFR	23/2093	87/10654	0.0749423	0.179302	0.113216	GRB2/HNRNPM/PIK3R1/HNRNPA1/RPS27A/UBA52/FGFBP2/UBB/UBC/POLR2K/POLR2L/SRC/PPP2CB/NRAS/PPP2CA/PTBP1/POLR2E/POLR2C/MAPK1/POLR2H/SPRED2/KRAS/HNRNPH1	23
R-HSA-1834941	STING mediated induction of host immune responses	6/2093	16/10654	0.075808	0.180412	0.113916	STAT6/STING1/IRF3/TBK1/IFI16/XRCC6	6
R-HSA-8949664	Processing of SMDT1	6/2093	16/10654	0.075808	0.180412	0.113916	PHB/PHB2/STOML2/MICU1/YME1L1/SMDT1	6
R-HSA-9614657	FOXO-mediated transcription of cell death genes	6/2093	16/10654	0.075808	0.180412	0.113916	FASLG/DDIT3/CITED2/FOXO3/BCL6/BCL2L11	6
R-HSA-2173793	Transcriptional activity of SMAD2/SMAD3:SMAD4 heterotrimer	13/2093	44/10654	0.0759931	0.180534	0.113993	PARP1/SKIL/RPS27A/UBA52/UBB/MYC/UBC/JUNB/UBE2D1/NCOR2/PPM1A/UBE2D3/USP9X	13
R-HSA-112382	Formation of RNA Pol II elongation complex	17/2093	61/10654	0.0762815	0.180582	0.114024	EAF2/TCEA1/MLLT3/POLR2K/ELOB/POLR2L/ELL/EAF1/AFF4/ELOC/POLR2E/POLR2C/POLR2H/MNAT1/RTF1/ELOA/CDC73	17
R-HSA-75955	RNA Polymerase II Transcription Elongation	17/2093	61/10654	0.0762815	0.180582	0.114024	EAF2/TCEA1/MLLT3/POLR2K/ELOB/POLR2L/ELL/EAF1/AFF4/ELOC/POLR2E/POLR2C/POLR2H/MNAT1/RTF1/ELOA/CDC73	17
R-HSA-5654741	Signaling by FGFR3	12/2093	40/10654	0.0780277	0.184392	0.116429	GRB2/PIK3R1/RPS27A/UBA52/UBB/UBC/SRC/PPP2CB/NRAS/PPP2CA/MAPK1/KRAS	12
R-HSA-164938	Nef-mediates down modulation of cell surface receptors by recruiting them to clathrin adapters	7/2093	20/10654	0.0798901	0.188462	0.118999	LCK/CD8B/B2M/ARF1/AP2S1/AP1S2/AP2M1	7
R-HSA-15869	Metabolism of nucleotides	26/2093	101/10654	0.0803953	0.189322	0.119542	ENTPD1/NME1/DCTPP1/TYMP/IMPDH2/PAICS/AK2/AK6/NT5C3A/SAMHD1/UPP1/APRT/TXN/AK4/GUK1/ADPRM/GPX1/GLRX/AMPD3/ADA/DPYD/IMPDH1/TXNRD1/DGUOK/AK8/UPB1	26
R-HSA-917729	Endosomal Sorting Complex Required For Transport (ESCRT)	10/2093	32/10654	0.0811401	0.190743	0.120439	RPS27A/UBA52/UBB/UBC/CHMP4A/CHMP4B/CHMP2A/CHMP5/VPS37B/TSG101	10
R-HSA-379716	Cytosolic tRNA aminoacylation	8/2093	24/10654	0.0816158	0.191194	0.120724	WARS1/EEF1E1/IARS1/QARS1/TARS1/YARS1/PPA1/GARS1	8
R-HSA-6783589	Interleukin-6 family signaling	8/2093	24/10654	0.0816158	0.191194	0.120724	JAK1/STAT3/IL6/SOCS3/JAK2/IL6ST/IL6R/STAT1	8
R-HSA-6806834	Signaling by MET	21/2093	79/10654	0.0819098	0.191549	0.120949	GRB2/PTPN1/SPINT2/PIK3R1/RPS27A/UBA52/UBB/RAC1/RAP1B/ARF6/UBC/RAPGEF1/EPS15/PTPN2/STAT3/SRC/TNS3/NRAS/RAB4B/SH3KBP1/KRAS	21
R-HSA-6782135	Dual incision in TC-NER	18/2093	66/10654	0.0830889	0.19397	0.122477	TCEA1/POLD2/RPA3/POLD4/RBX1/RPS27A/UBA52/UBB/UBC/POLR2K/POLR2L/POLR2E/HMGN1/RFC1/RPA2/POLR2C/POLR2H/MNAT1	18
R-HSA-9007101	Rab regulation of trafficking	31/2093	124/10654	0.0841263	0.196052	0.123792	RAB31/GDI2/YWHAE/TRAPPC1/RAB13/RAB27A/RAB8B/ARF6/RAB10/RAB9A/RAB1A/GGA1/RAB8A/RAB7A/GABARAP/TBC1D10C/RIN2/DENND5A/RAB21/DENND3/SBF2/MAP1LC3B/RAB5C/OPTN/RAB5A/GABARAPL2/CCZ1/TBC1D13/RAB5B/TBC1D17/RAB11A	31
R-HSA-157858	Gap junction trafficking and regulation	14/2093	49/10654	0.0854091	0.198698	0.125462	TUBA1B/ACTB/ACTG1/TUBA1C/TUBB4B/TUBA1A/TUBB6/DAB2/SRC/GJB2/CLTC/CLTA/TUBB2A/AP2M1	14
R-HSA-381340	Transcriptional regulation of white adipocyte differentiation	22/2093	84/10654	0.0872669	0.20267	0.12797	EBF1/NCOA3/CDK4/CCND3/NFKB1/TNF/CHD9/CD36/CEBPB/KLF4/RXRA/EGR2/NCOR2/MED13L/MED13/RELA/THRAP3/MED10/NCOA1/HELZ2/PPARA/MED28	22
R-HSA-416482	G alpha (12/13) signalling events	21/2093	80/10654	0.091372	0.211632	0.133629	GNG7/BTK/FGD2/GNG5/FGD3/RHOC/GNG2/RHOA/GNB1/AKAP13/ARHGEF1/ARHGEF10L/GNB4/GNB2/VAV1/ABR/GNA13/PREX1/ARHGEF2/ARHGEF3/GNA12	21
R-HSA-5654743	Signaling by FGFR4	12/2093	41/10654	0.0914399	0.211632	0.133629	GRB2/PIK3R1/RPS27A/UBA52/UBB/UBC/SRC/PPP2CB/NRAS/PPP2CA/MAPK1/KRAS	12
R-HSA-111461	Cytochrome c-mediated apoptotic response	5/2093	13/10654	0.0929823	0.213005	0.134496	CYCS/XIAP/MAPK1/CASP7/CASP3	5
R-HSA-140342	Apoptosis induced DNA fragmentation	5/2093	13/10654	0.0929823	0.213005	0.134496	HMGB1/H1-0/HMGB2/CASP3/H1-2	5
R-HSA-3270619	IRF3-mediated induction of type I IFN	5/2093	13/10654	0.0929823	0.213005	0.134496	STING1/IRF3/TBK1/IFI16/XRCC6	5
R-HSA-425561	Sodium/Calcium exchangers	5/2093	13/10654	0.0929823	0.213005	0.134496	SRI/CALM2/CALM1/SLC8A1/CALM3	5
R-HSA-75035	Chk1/Chk2(Cds1) mediated inactivation of Cyclin B:Cdk1 complex	5/2093	13/10654	0.0929823	0.213005	0.134496	YWHAZ/YWHAE/YWHAQ/YWHAG/YWHAB	5
R-HSA-75205	Dissolution of Fibrin Clot	5/2093	13/10654	0.0929823	0.213005	0.134496	S100A10/ANXA2/PLAUR/SERPINB8/SERPINB6	5
R-HSA-73856	RNA Polymerase II Transcription Termination	18/2093	67/10654	0.0936475	0.214165	0.135229	SNRPB/LSM10/THOC6/SRSF3/SNRPG/SNRPE/RNPS1/SNRPF/SRSF9/SRSF5/PAPOLA/SRSF7/SRRM1/MAGOHB/FYTTD1/SRSF4/PABPN1/U2AF1	18
R-HSA-6806003	Regulation of TP53 Expression and Degradation	11/2093	37/10654	0.0942636	0.215209	0.135888	PPP2R5C/ATM/CCNG1/RPS27A/UBA52/UBB/UBC/SGK1/PPP2CB/PPP2CA/PRDM1	11
R-HSA-163359	Glucagon signaling in metabolic regulation	10/2093	33/10654	0.0968112	0.220278	0.139089	GNG7/GNG5/GNG2/GNB1/PRKAR1A/GNB4/GNB2/PRKAR2A/GNAS/PRKACB	10
R-HSA-8964043	Plasma lipoprotein clearance	10/2093	33/10654	0.0968112	0.220278	0.139089	NPC2/AP2S1/APOC1/NR1H3/LIPA/CLTC/APOBR/CLTA/HDLBP/AP2M1	10
R-HSA-6811558	PI5P, PP2A and IER3 Regulate PI3K/AKT Signaling	26/2093	103/10654	0.0972494	0.220902	0.139483	CD19/CD86/GRB2/LCK/FYN/TRAT1/PPP2R5C/ICOS/RAC2/PIK3R1/IER3/PIK3AP1/RAC1/RHOG/PIP4K2A/EREG/SRC/CD80/PPP2CB/PIK3CB/IRAK1/IRS2/VAV1/PPP2CA/MYD88/MAPK1	26
R-HSA-1810476	RIP-mediated NFkB activation via ZBP1	6/2093	17/10654	0.0984332	0.222466	0.14047	NFKB1/NFKBIA/NFKB2/ZBP1/MYD88/RELA	6
R-HSA-450385	Butyrate Response Factor 1 (BRF1) binds and destabilizes mRNA	6/2093	17/10654	0.0984332	0.222466	0.14047	ZFP36L1/MAPKAPK2/DCP2/EXOSC8/XRN1/YWHAB	6
R-HSA-9034015	Signaling by NTRK3 (TRKC)	6/2093	17/10654	0.0984332	0.222466	0.14047	GRB2/PIK3R1/BAX/SRC/NRAS/KRAS	6
R-HSA-5654732	Negative regulation of FGFR3 signaling	9/2093	29/10654	0.0988983	0.222769	0.140662	GRB2/RPS27A/UBA52/UBB/UBC/SRC/PPP2CB/PPP2CA/MAPK1	9
R-HSA-8863795	Downregulation of ERBB2 signaling	9/2093	29/10654	0.0988983	0.222769	0.140662	RPS27A/UBA52/UBB/UBC/EREG/PTPN12/ERBIN/PTPN18/HSP90AA1	9
R-HSA-179409	APC-Cdc20 mediated degradation of Nek2A	8/2093	25/10654	0.100236	0.224914	0.142016	ANAPC11/RPS27A/UBA52/UBB/UBC/UBE2D1/UBE2E1/ANAPC16	8
R-HSA-392451	G beta:gamma signalling through PI3Kgamma	8/2093	25/10654	0.100236	0.224914	0.142016	GNG7/GNG5/GNG2/RHOA/GNB1/GNB4/PIK3R5/GNB2	8
R-HSA-445144	Signal transduction by L1	7/2093	21/10654	0.100351	0.224914	0.142016	RAC1/ITGAV/MAP2K1/PAK1/ITGA5/NCAM1/MAPK1	7
R-HSA-5663220	RHO GTPases Activate Formins	34/2093	140/10654	0.101604	0.227344	0.14355	TUBA1B/ACTB/ACTG1/DYNLL1/TUBA1C/TUBB4B/PPP2R5C/KIF2A/EVL/RPS27/RHOC/PFN1/RAC1/RHOA/FMNL1/CDC42/PAFAH1B1/TUBA1A/TUBB6/SRC/FMNL2/PPP2CB/PPP2CA/TAOK1/DYNC1LI1/DYNC1I2/MAD1L1/TUBB2A/NUP98/MAPRE1/DAAM1/NDE1/CLIP1/XPO1	34
R-HSA-204005	COPII-mediated vesicle transport	18/2093	68/10654	0.105023	0.234604	0.148134	TRAPPC1/CTSC/ANKRD28/TMED10/LMAN2/RAB1A/TMED2/SERPINA1/CTSZ/SEC24A/SEC24D/SEC31A/CD59/CSNK1D/STX5/LMAN1/TFG/NAPA	18
R-HSA-381676	Glucagon-like Peptide-1 (GLP1) regulates insulin secretion	12/2093	42/10654	0.106176	0.236786	0.149512	GNG7/GNG5/IQGAP1/GNG2/GNB1/PRKAR1A/GNB4/GNB2/ITPR2/PRKAR2A/GNAS/PRKACB	12
R-HSA-5655302	Signaling by FGFR1 in disease	11/2093	38/10654	0.110206	0.244964	0.154676	GRB2/LRRFIP1/PIK3R1/STAT3/GAB2/NRAS/CUX1/ZMYM2/STAT5A/KRAS/STAT1	11
R-HSA-8939243	RUNX1 interacts with co-factors whose precise effect on RUNX1 targets is not known	11/2093	38/10654	0.110206	0.244964	0.154676	SMARCB1/HIPK2/SMARCE1/RUNX1/RYBP/SMARCC2/AUTS2/CBX6/ARID1B/PBRM1/SMARCC1	11
R-HSA-977225	Amyloid fiber formation	27/2093	109/10654	0.110779	0.245831	0.155223	UBE2L6/H2BC12/H3-3A/H2AZ1/SORL1/ITM2B/TSPAN14/RPS27A/B2M/UBA52/H3-3B/UBB/LYZ/UBC/FURIN/GGA1/PSENEN/CST3/GSN/TGFBI/TSPAN33/APP/ADAM10/SIAH2/NCSTN/H4C3/USP9X	27
R-HSA-111885	Opioid Signalling	23/2093	91/10654	0.112299	0.248795	0.157095	GNG7/PPP1CA/GNG5/CALM2/CAMK4/PDE4D/CALM1/GNG2/GNAI2/GNB1/PRKAR1A/GNB4/PPP2CB/PDE4B/PDE4A/GNB2/AHCYL1/ITPR2/PPP2CA/PRKAR2A/PRKACB/MAPK1/CALM3	23
R-HSA-167238	Pausing and recovery of Tat-mediated HIV elongation	10/2093	34/10654	0.114133	0.249801	0.15773	TCEA1/POLR2K/ELOB/POLR2L/ELL/ELOC/POLR2E/POLR2C/POLR2H/ELOA	10
R-HSA-167243	Tat-mediated HIV elongation arrest and recovery	10/2093	34/10654	0.114133	0.249801	0.15773	TCEA1/POLR2K/ELOB/POLR2L/ELL/ELOC/POLR2E/POLR2C/POLR2H/ELOA	10
R-HSA-5663084	Diseases of carbohydrate metabolism	10/2093	34/10654	0.114133	0.249801	0.15773	IDS/RPS27A/UBA52/UBB/UBC/TALDO1/GNS/GAA/GBE1/GYS1	10
R-HSA-174437	Removal of the Flap Intermediate from the C-strand	4/2093	10/10654	0.114608	0.249801	0.15773	POLD2/RPA3/POLD4/RPA2	4
R-HSA-2465910	MASTL Facilitates Mitotic Progression	4/2093	10/10654	0.114608	0.249801	0.15773	ARPP19/ENSA/PPP2CB/PPP2CA	4
R-HSA-2562578	TRIF-mediated programmed cell death	4/2093	10/10654	0.114608	0.249801	0.15773	LY96/CD14/TLR4/CASP8	4
R-HSA-3215018	Processing and activation of SUMO	4/2093	10/10654	0.114608	0.249801	0.15773	SUMO1/SUMO3/UBE2I/SUMO2	4
R-HSA-442729	CREB1 phosphorylation through the activation of CaMKII/CaMKK/CaMKIV cascasde	4/2093	10/10654	0.114608	0.249801	0.15773	CALM2/CAMK4/CALM1/CALM3	4
R-HSA-450341	Activation of the AP-1 family of transcription factors	4/2093	10/10654	0.114608	0.249801	0.15773	FOS/JUN/MAPK1/MAPK8	4
R-HSA-8853334	Signaling by FGFR3 fusions in cancer	4/2093	10/10654	0.114608	0.249801	0.15773	GRB2/PIK3R1/NRAS/KRAS	4
R-HSA-190828	Gap junction trafficking	13/2093	47/10654	0.116997	0.254596	0.160758	TUBA1B/ACTB/ACTG1/TUBA1C/TUBB4B/TUBA1A/TUBB6/DAB2/GJB2/CLTC/CLTA/TUBB2A/AP2M1	13
R-HSA-4090294	SUMOylation of intracellular receptors	9/2093	30/10654	0.117815	0.255863	0.161558	RORA/SUMO1/RXRA/NR1H3/NR4A2/SUMO3/UBE2I/PPARA/SUMO2	9
R-HSA-422356	Regulation of insulin secretion	20/2093	78/10654	0.117959	0.255863	0.161558	GNG7/GNG5/IQGAP1/GNG2/GNAI2/GNB1/PRKAR1A/VAMP2/CD36/ACSL4/GNB4/GNA15/GNAQ/GNB2/AHCYL1/ITPR2/PRKAR2A/GNAS/PRKACB/SLC2A1	20
R-HSA-418885	DCC mediated attractive signaling	5/2093	14/10654	0.12219	0.263767	0.166548	FYN/RAC1/CDC42/SRC/ABLIM1	5
R-HSA-9005891	Loss of function of MECP2 in Rett syndrome	5/2093	14/10654	0.12219	0.263767	0.166548	CALM2/CAMK4/CALM1/NCOR2/CALM3	5
R-HSA-9005895	Pervasive developmental disorders	5/2093	14/10654	0.12219	0.263767	0.166548	CALM2/CAMK4/CALM1/NCOR2/CALM3	5
R-HSA-389977	Post-chaperonin tubulin folding pathway	7/2093	22/10654	0.123377	0.264704	0.16714	TUBA1B/TUBA1C/TUBB4B/TUBA1A/TUBB6/TUBB2A/TBCB	7
R-HSA-392170	ADP signalling through P2Y purinoceptor 12	7/2093	22/10654	0.123377	0.264704	0.16714	GNG7/GNG5/GNG2/GNAI2/GNB1/GNB4/GNB2	7
R-HSA-111471	Apoptotic factor-mediated response	6/2093	18/10654	0.124197	0.264704	0.16714	CYCS/BAX/XIAP/MAPK1/CASP7/CASP3	6
R-HSA-1368082	RORA activates gene expression	6/2093	18/10654	0.124197	0.264704	0.16714	RORA/CHD9/RXRA/NCOA1/HELZ2/PPARA	6
R-HSA-190840	Microtubule-dependent trafficking of connexons from Golgi to the plasma membrane	6/2093	18/10654	0.124197	0.264704	0.16714	TUBA1B/TUBA1C/TUBB4B/TUBA1A/TUBB6/TUBB2A	6
R-HSA-2022377	Metabolism of Angiotensinogen to Angiotensins	6/2093	18/10654	0.124197	0.264704	0.16714	GZMH/CTSD/CTSZ/ANPEP/CES1/ATP6AP2	6
R-HSA-210993	Tie2 Signaling	6/2093	18/10654	0.124197	0.264704	0.16714	GRB2/PIK3R1/DOK2/PIK3CB/NRAS/KRAS	6
R-HSA-881907	Gastrin-CREB signalling pathway via PKC and MAPK	6/2093	18/10654	0.124197	0.264704	0.16714	GRB2/NRAS/RPS6KA1/RPS6KA3/MAPK1/KRAS	6
R-HSA-2980766	Nuclear Envelope Breakdown	14/2093	52/10654	0.126849	0.26993	0.17044	PRKCB/VRK2/BANF1/LMNA/NUP58/NUP62/NUP214/CTDNEP1/LPIN2/TPR/LPIN1/LMNB1/NUP98/EMD	14
R-HSA-6781827	Transcription-Coupled Nucleotide Excision Repair (TC-NER)	20/2093	79/10654	0.130179	0.27658	0.174639	TCEA1/POLD2/RPA3/POLD4/RBX1/RPS27A/UBA52/UBB/UBC/POLR2K/POLR2L/ELL/POLR2E/HMGN1/RFC1/COPS6/RPA2/POLR2C/POLR2H/MNAT1	20
R-HSA-5696399	Global Genome Nucleotide Excision Repair (GG-NER)	21/2093	84/10654	0.136062	0.288622	0.182243	PARP1/ACTB/UBE2N/POLD2/RPA3/POLD4/RBX1/RAD23A/RPS27A/UBA52/UBB/UBC/SUMO1/RAD23B/SUMO3/RFC1/COPS6/RPA2/MNAT1/UBE2I/SUMO2	21
R-HSA-1852241	Organelle biogenesis and maintenance	66/2093	296/10654	0.138226	0.292518	0.184703	MEF2C/TUBA1B/IFT57/ATP5MC1/ATP6/CCT5/DYNLL1/TUBA1C/ATP5F1B/TUBB4B/CYCS/YWHAE/ATP5MC3/TUBB/CALM2/CCT3/OFD1/CAMK4/MICOS13/ATP5PF/ATP5MF/CALM1/SOD2/PAFAH1B1/RAB8A/CHD9/SEPTIN2/TUBA1A/TUBB6/RXRA/ASAP1/ATP5F1E/YWHAG/ALAS1/ATP5MC2/ARF4/ATP5MG/PRKAG2/EXOC5/SDCCAG8/DYNLRB1/DYNC1I2/ATP8/ATP5F1A/HSPA9/ATP5PO/SSBP1/AKAP9/NCOA1/ATP5PD/HSPB11/CSNK1D/HELZ2/PRKAG1/TUBB2A/GABPB1/TNPO1/CEP135/PPARA/MAPRE1/KIF3B/S…	66
R-HSA-1839124	FGFR1 mutant receptor activation	9/2093	31/10654	0.13855	0.292518	0.184703	GRB2/LRRFIP1/PIK3R1/STAT3/GAB2/CUX1/ZMYM2/STAT5A/STAT1	9
R-HSA-5654733	Negative regulation of FGFR4 signaling	9/2093	31/10654	0.13855	0.292518	0.184703	GRB2/RPS27A/UBA52/UBB/UBC/SRC/PPP2CB/PPP2CA/MAPK1	9
R-HSA-5633008	TP53 Regulates Transcription of Cell Death Genes	12/2093	44/10654	0.139563	0.294195	0.185762	PMAIP1/BID/ATM/BAX/BNIP3L/NDRG1/PRELID1/BCL6/CASP1/TMEM219/BCL2L14/FAS	12
R-HSA-354192	Integrin alphaIIb beta3 signaling	8/2093	27/10654	0.14389	0.302312	0.190887	SYK/GRB2/PTPN1/RASGRP1/TLN1/RAP1B/SRC/APBB1IP	8
R-HSA-9006921	Integrin signaling	8/2093	27/10654	0.14389	0.302312	0.190887	SYK/GRB2/PTPN1/RASGRP1/TLN1/RAP1B/SRC/APBB1IP	8
R-HSA-4086398	Ca2+ pathway	16/2093	62/10654	0.144086	0.302312	0.190887	GNG7/TCF7/LEF1/GNG5/CALM2/CALM1/GNG2/GNB1/GNB4/TCF7L2/GNB2/CTNNB1/ITPR2/TNRC6B/KRAS/CALM3	16
R-HSA-163685	Integration of energy metabolism	26/2093	108/10654	0.148794	0.311704	0.196817	GNG7/GNG5/IQGAP1/GNG2/GNAI2/GNB1/PRKAR1A/TALDO1/VAMP2/CD36/ACSL4/GNB4/GNA15/PPP2CB/GNAQ/GNB2/AHCYL1/ITPR2/PPP2CA/ADIPOR1/PRKAG2/PRKAR2A/GNAS/PRKACB/TKT/SLC2A1	26
R-HSA-6791312	TP53 Regulates Transcription of Cell Cycle Genes	13/2093	49/10654	0.150249	0.313136	0.197721	PRMT1/BTG2/NPM1/CDKN1A/BAX/RBL2/ZNF385A/PLK3/ARID3A/CNOT4/PLAGL1/GADD45A/CNOT7	13
R-HSA-163615	PKA activation	6/2093	19/10654	0.15287	0.313136	0.197721	CALM2/CALM1/PRKAR1A/PRKAR2A/PRKACB/CALM3	6
R-HSA-422085	Synthesis, secretion, and deacylation of Ghrelin	6/2093	19/10654	0.15287	0.313136	0.197721	SEC11C/SPCS2/SPCS3/SEC11A/PLA2G7/KLF4	6
R-HSA-8964038	LDL clearance	6/2093	19/10654	0.15287	0.313136	0.197721	NPC2/AP2S1/LIPA/CLTC/CLTA/AP2M1	6
R-HSA-1234158	Regulation of gene expression by Hypoxia-inducible Factor	4/2093	11/10654	0.153265	0.313136	0.197721	HIF1A/VEGFA/CITED2/HIGD1A	4
R-HSA-174414	Processive synthesis on the C-strand of the telomere	4/2093	11/10654	0.153265	0.313136	0.197721	POLD2/RPA3/POLD4/RPA2	4
R-HSA-400451	Free fatty acids regulate insulin secretion	4/2093	11/10654	0.153265	0.313136	0.197721	CD36/ACSL4/GNA15/GNAQ	4
R-HSA-5655291	Signaling by FGFR4 in disease	4/2093	11/10654	0.153265	0.313136	0.197721	GRB2/PIK3R1/NRAS/KRAS	4
R-HSA-75072	mRNA Editing	4/2093	11/10654	0.153265	0.313136	0.197721	APOBEC3C/APOBEC3A/ADAR/ADARB1	4
R-HSA-8875555	MET activates RAP1 and RAC1	4/2093	11/10654	0.153265	0.313136	0.197721	GRB2/RAC1/RAP1B/RAPGEF1	4
R-HSA-167287	HIV elongation arrest and recovery	10/2093	36/10654	0.153562	0.313136	0.197721	TCEA1/POLR2K/ELOB/POLR2L/ELL/ELOC/POLR2E/POLR2C/POLR2H/ELOA	10
R-HSA-167290	Pausing and recovery of HIV elongation	10/2093	36/10654	0.153562	0.313136	0.197721	TCEA1/POLR2K/ELOB/POLR2L/ELL/ELOC/POLR2E/POLR2C/POLR2H/ELOA	10
R-HSA-6804757	Regulation of TP53 Degradation	10/2093	36/10654	0.153562	0.313136	0.197721	PPP2R5C/ATM/CCNG1/RPS27A/UBA52/UBB/UBC/SGK1/PPP2CB/PPP2CA	10
R-HSA-2980736	Peptide hormone metabolism	22/2093	90/10654	0.154386	0.313136	0.197721	SEC11C/GZMH/CTSD/RAB27A/SPCS2/ERO1A/SPCS3/SEC11A/VAMP2/INHBA/CTSZ/ANPEP/PLA2G7/KLF4/CES1/TCF7L2/ATP6AP2/CTNNB1/KIF5B/SLC30A7/EXOC5/MYO5A	22
R-HSA-1170546	Prolactin receptor signaling	5/2093	15/10654	0.155057	0.313136	0.197721	RBX1/JAK2/CUL1/SKP1/STAT5A	5
R-HSA-354194	GRB2:SOS provides linkage to MAPK signaling for Integrins	5/2093	15/10654	0.155057	0.313136	0.197721	GRB2/TLN1/RAP1B/SRC/APBB1IP	5
R-HSA-4839743	phosphorylation site mutants of CTNNB1 are not targeted to the proteasome by the destruction complex	5/2093	15/10654	0.155057	0.313136	0.197721	PPP2R5C/PPP2CB/CTNNB1/PPP2CA/CSNK1A1	5
R-HSA-5339716	Misspliced GSK3beta mutants stabilize beta-catenin	5/2093	15/10654	0.155057	0.313136	0.197721	PPP2R5C/PPP2CB/CTNNB1/PPP2CA/CSNK1A1	5
R-HSA-5358747	S33 mutants of beta-catenin aren't phosphorylated	5/2093	15/10654	0.155057	0.313136	0.197721	PPP2R5C/PPP2CB/CTNNB1/PPP2CA/CSNK1A1	5
R-HSA-5358749	S37 mutants of beta-catenin aren't phosphorylated	5/2093	15/10654	0.155057	0.313136	0.197721	PPP2R5C/PPP2CB/CTNNB1/PPP2CA/CSNK1A1	5
R-HSA-5358751	S45 mutants of beta-catenin aren't phosphorylated	5/2093	15/10654	0.155057	0.313136	0.197721	PPP2R5C/PPP2CB/CTNNB1/PPP2CA/CSNK1A1	5
R-HSA-5358752	T41 mutants of beta-catenin aren't phosphorylated	5/2093	15/10654	0.155057	0.313136	0.197721	PPP2R5C/PPP2CB/CTNNB1/PPP2CA/CSNK1A1	5
R-HSA-5637810	Constitutive Signaling by EGFRvIII	5/2093	15/10654	0.155057	0.313136	0.197721	GRB2/PIK3R1/NRAS/KRAS/HSP90AA1	5
R-HSA-5637812	Signaling by EGFRvIII in Cancer	5/2093	15/10654	0.155057	0.313136	0.197721	GRB2/PIK3R1/NRAS/KRAS/HSP90AA1	5
R-HSA-3899300	SUMOylation of transcription cofactors	12/2093	45/10654	0.158145	0.318894	0.201357	HIPK2/PARK7/NPM1/SUMO1/DDX5/NCOR2/SUMO3/TRIM28/NCOA1/UBE2I/NRIP1/SUMO2	12
R-HSA-8957322	Metabolism of steroids	35/2093	151/10654	0.159073	0.320286	0.202236	SQLE/RAN/HSD17B12/FDFT1/IDI1/INSIG2/CHD9/SCP2/TSPO/CYP27A1/MTF1/INSIG1/RXRA/HSD17B4/LSS/SEC24A/SEC24D/STARD3NL/HMGCS1/AKR1C3/NCOA1/FDPS/HELZ2/UBE2I/SCD/LGMN/STARD4/DHCR24/MSMO1/ACAT2/MVD/PPARA/OSBPL9/SUMO2/HSD17B11	35
R-HSA-1226099	Signaling by FGFR in disease	16/2093	63/10654	0.159799	0.320885	0.202614	GRB2/LRRFIP1/PIK3R1/POLR2K/POLR2L/STAT3/GAB2/NRAS/CUX1/POLR2E/ZMYM2/POLR2C/POLR2H/STAT5A/KRAS/STAT1	16
R-HSA-6781823	Formation of TC-NER Pre-Incision Complex	14/2093	54/10654	0.159847	0.320885	0.202614	TCEA1/RBX1/RPS27A/UBA52/UBB/UBC/POLR2K/POLR2L/POLR2E/HMGN1/COPS6/POLR2C/POLR2H/MNAT1	14
R-HSA-1251985	Nuclear signaling by ERBB4	9/2093	32/10654	0.161014	0.322268	0.203487	ADAM17/PSENEN/EREG/SRC/PSEN1/NCSTN/TAB2/STMN1/STAT5A	9
R-HSA-451326	Activation of kainate receptors upon glutamate binding	9/2093	32/10654	0.161014	0.322268	0.203487	GNG7/GNG5/CALM2/CALM1/GNG2/GNB1/GNB4/GNB2/CALM3	9
R-HSA-5696400	Dual Incision in GG-NER	11/2093	41/10654	0.166556	0.332865	0.210179	PARP1/POLD2/RPA3/POLD4/RBX1/RPS27A/UBA52/UBB/UBC/RFC1/RPA2	11
R-HSA-70326	Glucose metabolism	22/2093	91/10654	0.167805	0.334864	0.211441	PKM/TPI1/PGAM1/GAPDH/ALDOA/PGK1/BPGM/ENO1/HK2/PFKFB3/FBP1/PPP2CB/NUP58/ADPGK/NUP62/NUP214/PPP2CA/PFKL/TPR/PRKACB/ALDOC/NUP98	22
R-HSA-5654736	Signaling by FGFR1	13/2093	50/10654	0.168562	0.335877	0.21208	GRB2/PIK3R1/RPS27A/UBA52/UBB/UBC/SRC/PPP2CB/NRAS/PPP2CA/MAPK1/SPRED2/KRAS	13
R-HSA-199418	Negative regulation of the PI3K/AKT network	26/2093	110/10654	0.173126	0.344461	0.217501	CD19/CD86/GRB2/LCK/FYN/TRAT1/PPP2R5C/ICOS/RAC2/PIK3R1/IER3/PIK3AP1/RAC1/RHOG/PIP4K2A/EREG/SRC/CD80/PPP2CB/PIK3CB/IRAK1/IRS2/VAV1/PPP2CA/MYD88/MAPK1	26
R-HSA-8979227	Triglyceride metabolism	10/2093	37/10654	0.175524	0.348718	0.220188	FABP5/PPP1CA/GK/GPD2/MGLL/PPP1CB/PLIN3/LPIN2/PRKACB/LPIN1	10
R-HSA-163560	Triglyceride catabolism	7/2093	24/10654	0.176501	0.349113	0.220438	FABP5/PPP1CA/GPD2/MGLL/PPP1CB/PLIN3/PRKACB	7
R-HSA-203927	MicroRNA (miRNA) biogenesis	7/2093	24/10654	0.176501	0.349113	0.220438	RAN/POLR2K/POLR2L/DICER1/POLR2E/POLR2C/POLR2H	7
R-HSA-3371571	HSF1-dependent transactivation	7/2093	24/10654	0.176501	0.349113	0.220438	HSP90AB1/HSBP1/DNAJB1/AKT1S1/HSPA8/HSPA1A/HSP90AA1	7
R-HSA-381771	Synthesis, secretion, and inactivation of Glucagon-like Peptide-1 (GLP-1)	6/2093	20/10654	0.184147	0.362111	0.228645	SEC11C/SPCS2/SPCS3/SEC11A/TCF7L2/CTNNB1	6
R-HSA-418217	G beta:gamma signalling through PLC beta	6/2093	20/10654	0.184147	0.362111	0.228645	GNG7/GNG5/GNG2/GNB1/GNB4/GNB2	6
R-HSA-6803204	TP53 Regulates Transcription of Genes Involved in Cytochrome C Release	6/2093	20/10654	0.184147	0.362111	0.228645	PMAIP1/BID/ATM/BAX/BNIP3L/PRELID1	6
R-HSA-8978934	Metabolism of cofactors	6/2093	20/10654	0.184147	0.362111	0.228645	CALM2/CALM1/GCH1/GCHFR/CALM3/HSP90AA1	6
R-HSA-2559580	Oxidative Stress Induced Senescence	29/2093	125/10654	0.184615	0.362503	0.228893	CDK4/H2BC12/H3-3A/H2AZ1/TXN/RPS27A/UBA52/H3-3B/UBB/UBC/FOS/MAP2K3/JUN/KDM6B/MAPKAPK2/H2AJ/MAPKAPK3/TNRC6B/MAP4K4/H4C3/MAPK1/RBBP4/MAP2K7/EZH2/CDK6/MAPK8/MINK1/CBX6/H2AZ2	29
R-HSA-5654726	Negative regulation of FGFR1 signaling	9/2093	33/10654	0.185091	0.362907	0.229148	GRB2/RPS27A/UBA52/UBB/UBC/SRC/PPP2CB/PPP2CA/MAPK1	9
R-HSA-2173782	Binding and Uptake of Ligands by Scavenger Receptors	11/2093	42/10654	0.187981	0.367505	0.232051	JCHAIN/FTH1/HYOU1/CALR/HSP90B1/FTL/CD36/LRP1/CD163/MARCO/HSP90AA1	11
R-HSA-6814122	Cooperation of PDCL (PhLP1) and TRiC/CCT in G-protein beta folding	11/2093	42/10654	0.187981	0.367505	0.232051	GNG7/CCT5/CCT6A/GNG5/CCT3/GNG2/GNAI2/GNB1/GNB4/GNB2/CCT7	11
R-HSA-2559584	Formation of Senescence-Associated Heterochromatin Foci (SAHF)	5/2093	16/10654	0.191079	0.372195	0.235012	HMGA1/H1-0/RB1/LMNB1/H1-2	5
R-HSA-392517	Rap1 signalling	5/2093	16/10654	0.191079	0.372195	0.235012	YWHAZ/RASGRP1/RAP1B/PRKACB/YWHAB	5
R-HSA-9006936	Signaling by TGF-beta family members	24/2093	102/10654	0.191209	0.372195	0.235012	PARP1/PPP1CA/SKIL/PPP1R15A/FKBP1A/RPS27A/UBA52/UBB/MYC/UBC/RHOA/FURIN/INHBA/ZFYVE16/JUNB/UBE2D1/TGFBR1/NCOR2/PPP1CB/PPM1A/DRAP1/UBE2D3/USP9X/XPO1	24
R-HSA-111932	CaMK IV-mediated phosphorylation of CREB	4/2093	12/10654	0.195984	0.378004	0.23868	CALM2/CAMK4/CALM1/CALM3	4
R-HSA-170968	Frs2-mediated activation	4/2093	12/10654	0.195984	0.378004	0.23868	RAPGEF1/MAP2K1/MAPK1/YWHAB	4
R-HSA-2160916	Hyaluronan uptake and degradation	4/2093	12/10654	0.195984	0.378004	0.23868	CD44/HEXB/CHP1/HEXA	4
R-HSA-2197563	NOTCH2 intracellular domain regulates transcription	4/2093	12/10654	0.195984	0.378004	0.23868	GZMB/RBPJ/NOTCH2/MAML2	4
R-HSA-430116	GP1b-IX-V activation signalling	4/2093	12/10654	0.195984	0.378004	0.23868	YWHAZ/PIK3R1/SRC/FLNA	4
R-HSA-9634600	Regulation of glycolysis by fructose 2,6-bisphosphate metabolism	4/2093	12/10654	0.195984	0.378004	0.23868	PFKFB3/PPP2CB/PPP2CA/PRKACB	4
R-HSA-9006931	Signaling by Nuclear Receptors	65/2093	299/10654	0.196404	0.378004	0.23868	FABP5/GNG7/ZDHHC21/CXXC5/PRMT1/BCL2/HSP90AB1/NCOA3/ARL4C/GTF2A2/GNG5/CALM2/H2BC12/PIK3R1/H3-3A/JUND/H2AZ1/CALM1/H3-3B/GNG2/CTSD/MYC/GNAI2/GNB1/POLR2K/POLR2L/DDX5/APOC1/EREG/ABCA1/MMP9/SRC/FOS/RXRA/GNB4/SPHK1/NR1H3/ABCG1/FOSB/RUNX1/JUN/GNB2/NCOR2/NRAS/FOXO3/H2AJ/USF2/TNRC6B/POLR2E/H4C3/POLR2C/AKR1C3/MAPK1/POLR2H/NCOA1/STAG2/SCD/NRIP1/TLE3/H2AZ2/KRAS/CALM3/RAD21/XPO1/HSP90AA1	65
R-HSA-442755	Activation of NMDA receptors and postsynaptic events	22/2093	93/10654	0.196438	0.378004	0.23868	TUBA1B/TUBA1C/TUBB4B/CALM2/CAMK4/CALM1/RAC1/PRKAR1A/TUBA1A/TUBB6/SRC/NRAS/RPS6KA1/PRKAG2/PRKAR2A/RPS6KA3/PRKACB/MAPK1/PRKAG1/TUBB2A/KRAS/CALM3	22
R-HSA-5578775	Ion homeostasis	14/2093	56/10654	0.196834	0.378224	0.238819	ORAI2/ATP2B1/SRI/CALM2/CALM1/ATP1B3/SLC8A1/ATP2A2/AHCYL1/ITPR2/ATP2B4/CLIC2/FXYD2/CALM3	14
R-HSA-5696394	DNA Damage Recognition in GG-NER	10/2093	38/10654	0.198852	0.381557	0.240924	PARP1/ACTB/RBX1/RAD23A/RPS27A/UBA52/UBB/UBC/RAD23B/COPS6	10
R-HSA-9018519	Estrogen-dependent gene expression	34/2093	150/10654	0.200208	0.383368	0.242067	CXXC5/PRMT1/BCL2/HSP90AB1/NCOA3/GTF2A2/H2BC12/H3-3A/JUND/H2AZ1/H3-3B/CTSD/MYC/POLR2K/POLR2L/DDX5/FOS/FOSB/RUNX1/JUN/H2AJ/USF2/TNRC6B/POLR2E/H4C3/POLR2C/POLR2H/NCOA1/STAG2/NRIP1/TLE3/H2AZ2/RAD21/HSP90AA1	34
R-HSA-380259	Loss of Nlp from mitotic centrosomes	17/2093	70/10654	0.200649	0.383368	0.242067	DYNLL1/TUBB4B/YWHAE/TUBB/OFD1/PAFAH1B1/TUBA1A/YWHAG/SDCCAG8/DYNC1I2/AKAP9/CSNK1D/CEP135/MAPRE1/SSNA1/NDE1/HSP90AA1	17
R-HSA-380284	Loss of proteins required for interphase microtubule organization from the centrosome	17/2093	70/10654	0.200649	0.383368	0.242067	DYNLL1/TUBB4B/YWHAE/TUBB/OFD1/PAFAH1B1/TUBA1A/YWHAG/SDCCAG8/DYNC1I2/AKAP9/CSNK1D/CEP135/MAPRE1/SSNA1/NDE1/HSP90AA1	17
R-HSA-674695	RNA Polymerase II Pre-transcription Events	20/2093	84/10654	0.201696	0.384822	0.242986	EAF2/TCEA1/GTF2A2/TAF7/MLLT3/POLR2K/ELOB/POLR2L/ELL/EAF1/TAF13/AFF4/ELOC/POLR2E/POLR2C/POLR2H/MNAT1/RTF1/ELOA/CDC73	20
R-HSA-8943724	Regulation of PTEN gene transcription	15/2093	61/10654	0.204801	0.390194	0.246377	LAMTOR5/LAMTOR1/EGR1/RHEB/JUN/RRAGC/LAMTOR3/LAMTOR2/LAMTOR4/MAPK1/RBBP4/CHD4/EZH2/CBX6/HDAC2	15
R-HSA-8854691	Interleukin-20 family signaling	7/2093	25/10654	0.206159	0.391673	0.247311	STAT4/JAK1/STAT3/JAK2/IL10RB/STAT5A/STAT1	7
R-HSA-9006115	Signaling by NTRK2 (TRKB)	7/2093	25/10654	0.206159	0.391673	0.247311	GRB2/FYN/PIK3R1/RAC1/SRC/NRAS/KRAS	7
R-HSA-428157	Sphingolipid metabolism	21/2093	89/10654	0.206838	0.392	0.247518	SPTSSA/PSAP/ASAH1/GM2A/SPHK1/HEXB/GLA/CERS6/CTSA/SGPL1/CERT1/SGMS1/UGCG/NEU1/SAMD8/ORMDL2/ORMDL3/ORMDL1/SUMF2/PRKD3/HEXA	21
R-HSA-2219530	Constitutive Signaling by Aberrant PI3K in Cancer	18/2093	75/10654	0.206913	0.392	0.247518	CD19/CD86/GRB2/LCK/FYN/TRAT1/ICOS/RAC2/PIK3R1/PIK3AP1/RAC1/RHOG/EREG/SRC/CD80/PIK3CB/IRS2/VAV1	18
R-HSA-1660661	Sphingolipid de novo biosynthesis	11/2093	43/10654	0.210585	0.397375	0.250912	SPTSSA/SPHK1/CERS6/SGPL1/CERT1/SGMS1/SAMD8/ORMDL2/ORMDL3/ORMDL1/PRKD3	11
R-HSA-432040	Vasopressin regulates renal water homeostasis via Aquaporins	11/2093	43/10654	0.210585	0.397375	0.250912	GNG7/GNG5/GNG2/GNB1/PRKAR1A/GNB4/GNB2/PRKAR2A/GNAS/PRKACB/RAB11A	11
R-HSA-5654727	Negative regulation of FGFR2 signaling	9/2093	34/10654	0.210635	0.397375	0.250912	GRB2/RPS27A/UBA52/UBB/UBC/SRC/PPP2CB/PPP2CA/MAPK1	9
R-HSA-111931	PKA-mediated phosphorylation of CREB	6/2093	21/10654	0.217665	0.408349	0.257841	CALM2/CALM1/PRKAR1A/PRKAR2A/PRKACB/CALM3	6
R-HSA-500657	Presynaptic function of Kainate receptors	6/2093	21/10654	0.217665	0.408349	0.257841	GNG7/GNG5/GNG2/GNB1/GNB4/GNB2	6
R-HSA-5651801	PCNA-Dependent Long Patch Base Excision Repair	6/2093	21/10654	0.217665	0.408349	0.257841	POLD2/RPA3/POLD4/APEX1/RFC1/RPA2	6
R-HSA-6804115	TP53 regulates transcription of additional cell cycle genes whose exact role in the p53 pathway remain uncertain	6/2093	21/10654	0.217665	0.408349	0.257841	BTG2/NPM1/PLK3/CNOT4/PLAGL1/CNOT7	6
R-HSA-418597	G alpha (z) signalling events	12/2093	48/10654	0.220719	0.413503	0.261095	GNG7/RGS19/PRKCB/RGS16/GNG5/PRKCH/GNG2/GNAI2/GNB1/GNB4/GNB2/GNAS	12
R-HSA-8876198	RAB GEFs exchange GTP for GDP on RABs	21/2093	90/10654	0.222802	0.415764	0.262523	RAB31/GDI2/YWHAE/TRAPPC1/RAB13/RAB27A/RAB8B/RAB10/RAB9A/RAB1A/RAB8A/RAB7A/RIN2/DENND5A/RAB21/DENND3/SBF2/RAB5C/RAB5A/CCZ1/RAB5B	21
R-HSA-73933	Resolution of Abasic Sites (AP sites)	10/2093	39/10654	0.223421	0.415764	0.262523	PARP1/POLD2/RPA3/MPG/POLD4/MBD4/APEX1/RFC1/RPA2/TDG	10
R-HSA-3928663	EPHA-mediated growth cone collapse	8/2093	30/10654	0.223469	0.415764	0.262523	LYN/FYN/MYL12A/MYL6/RHOA/MYH9/MYL12B/SRC	8
R-HSA-442742	CREB1 phosphorylation through NMDA receptor-mediated activation of RAS signaling	8/2093	30/10654	0.223469	0.415764	0.262523	CALM2/CALM1/NRAS/RPS6KA1/RPS6KA3/MAPK1/KRAS/CALM3	8
R-HSA-525793	Myogenesis	8/2093	30/10654	0.223469	0.415764	0.262523	MEF2C/TCF4/CDC42/CTNNA1/SPAG9/CTNNB1/MEF2A/BNIP2	8
R-HSA-6790901	rRNA modification in the nucleus and cytosol	15/2093	62/10654	0.224178	0.416508	0.262992	NHP2/IMP4/EMG1/WDR43/NOP10/RPS7/SNU13/TRMT112/RPS2/RPS6/RPS14/RPS9/FBL/NOP58/UTP11	15
R-HSA-5625740	RHO GTPases activate PKNs	22/2093	95/10654	0.227311	0.421501	0.266145	YWHAZ/YWHAE/H2BC12/H3-3A/H2AZ1/MYL12A/H3-3B/RHOC/MYL6/RAC1/RHOA/YWHAQ/MYH9/PPP1R12A/MYL12B/YWHAG/PPP1CB/PAK1/H2AJ/H4C3/H2AZ2/YWHAB	22
R-HSA-191859	snRNP Assembly	13/2093	53/10654	0.229568	0.421501	0.266145	GEMIN7/SNRPB/SNRPD1/SNRPG/SNRPE/SNRPF/NUP58/NUP62/SNRPD2/NUP214/TPR/CLNS1A/NUP98	13
R-HSA-194441	Metabolism of non-coding RNA	13/2093	53/10654	0.229568	0.421501	0.266145	GEMIN7/SNRPB/SNRPD1/SNRPG/SNRPE/SNRPF/NUP58/NUP62/SNRPD2/NUP214/TPR/CLNS1A/NUP98	13
R-HSA-180292	GAB1 signalosome	5/2093	17/10654	0.229682	0.421501	0.266145	GRB2/PIK3R1/EREG/SRC/PAG1	5
R-HSA-196299	Beta-catenin phosphorylation cascade	5/2093	17/10654	0.229682	0.421501	0.266145	PPP2R5C/PPP2CB/CTNNB1/PPP2CA/CSNK1A1	5
R-HSA-2142845	Hyaluronan metabolism	5/2093	17/10654	0.229682	0.421501	0.266145	CD44/CEMIP/HEXB/CHP1/HEXA	5
R-HSA-432142	Platelet sensitization by LDL	5/2093	17/10654	0.229682	0.421501	0.266145	PTPN6/PPP2R5C/FGR/PPP2CB/PPP2CA	5
R-HSA-435354	Zinc transporters	5/2093	17/10654	0.229682	0.421501	0.266145	SLC39A8/SLC30A1/SLC39A1/SLC30A7/SLC39A7	5
R-HSA-70221	Glycogen breakdown (glycogenolysis)	5/2093	17/10654	0.229682	0.421501	0.266145	CALM2/CALM1/GAA/PHKB/CALM3	5
R-HSA-1500931	Cell-Cell communication	29/2093	129/10654	0.237282	0.433063	0.273446	SKAP2/FYB1/GRB2/ACTB/PTPN6/FYN/ACTG1/VASP/TYROBP/PIK3R1/IQGAP1/ACTN4/PTK2B/ILK/LIMS1/SIRPA/NECTIN2/SRC/CTNNA1/CTNND1/PARVB/PIK3CB/FLNA/PLEC/CTNNB1/ACTN1/RSU1/CD47/PVR	29
R-HSA-186797	Signaling by PDGF	14/2093	58/10654	0.237367	0.433063	0.273446	GRB2/STAT6/PIK3R1/RAPGEF1/FURIN/STAT3/SPP1/PTPN12/SRC/PIK3CB/NRAS/STAT5A/KRAS/STAT1	14
R-HSA-110373	Resolution of AP sites via the multiple-nucleotide patch replacement pathway	7/2093	26/10654	0.237525	0.433063	0.273446	PARP1/POLD2/RPA3/POLD4/APEX1/RFC1/RPA2	7
R-HSA-912694	Regulation of IFNA signaling	7/2093	26/10654	0.237525	0.433063	0.273446	PTPN1/PTPN6/JAK1/SOCS3/IFNAR1/USP18/STAT1	7
R-HSA-3108232	SUMO E3 ligases SUMOylate target proteins	40/2093	182/10654	0.23759	0.433063	0.273446	SMC6/PARP1/RORA/HIPK2/PARK7/SATB1/NPM1/NFKBIA/NFKB2/SUMO1/DDX5/MITF/RXRA/NR1H3/NUP58/NR4A2/NUP62/NCOR2/NUP214/SUMO3/TRIM28/SP100/RELA/H4C3/TPR/NOP58/NCOA1/TOP1/UBE2I/STAG2/NUP98/PPARA/NRIP1/ZBED1/HDAC2/TDG/RAD21/PML/SUMO2/HNRNPC	40
R-HSA-1358803	Downregulation of ERBB2:ERBB3 signaling	4/2093	13/10654	0.241763	0.43712	0.276008	RPS27A/UBA52/UBB/UBC	4
R-HSA-179812	GRB2 events in EGFR signaling	4/2093	13/10654	0.241763	0.43712	0.276008	GRB2/EREG/NRAS/KRAS	4
R-HSA-400511	Synthesis, secretion, and inactivation of Glucose-dependent Insulinotropic Polypeptide (GIP)	4/2093	13/10654	0.241763	0.43712	0.276008	SEC11C/SPCS2/SPCS3/SEC11A	4
R-HSA-5140745	WNT5A-dependent internalization of FZD2, FZD5 and ROR2	4/2093	13/10654	0.241763	0.43712	0.276008	AP2S1/CLTC/CLTA/AP2M1	4
R-HSA-5357786	TNFR1-induced proapoptotic signaling	4/2093	13/10654	0.241763	0.43712	0.276008	TNFAIP3/TNF/CASP8/CYLD	4
R-HSA-74217	Purine salvage	4/2093	13/10654	0.241763	0.43712	0.276008	APRT/AMPD3/ADA/DGUOK	4
R-HSA-71387	Metabolism of carbohydrates	63/2093	295/10654	0.247193	0.446339	0.281829	AKR1A1/PKM/TPI1/PGAM1/IDS/CALM2/GAPDH/ALDOA/CD44/UGP2/CALM1/RPS27A/UBA52/UBB/UBC/CHST12/PGK1/BPGM/TALDO1/ENO1/VCAN/GNS/HK2/PFKFB3/DSE/SDC2/SDC4/FBP1/CEMIP/HS3ST3B1/B4GALT5/HEXB/B4GALT1/PPP2CB/PGD/GAA/CSGALNACT2/CHST11/NUP58/ADPGK/NUP62/G6PD/MANBA/PAPSS1/CHSY1/NUP214/PPP2CA/CHP1/PFKL/GBE1/TPR/PRKACB/PGM1/TKT/ST6GALNAC6/ALDOC/HEXA/GYS1/SLC2A1/NUP98/B3GNT2/PHKB/CALM3	63
R-HSA-389357	CD28 dependent PI3K/Akt signaling	6/2093	22/10654	0.253023	0.456254	0.288089	CD86/LCK/FYN/PIK3R1/MAP3K8/CD80	6
R-HSA-8854518	AURKA Activation by TPX2	17/2093	73/10654	0.256076	0.461143	0.291176	DYNLL1/TUBB4B/YWHAE/TUBB/OFD1/PAFAH1B1/TUBA1A/YWHAG/SDCCAG8/DYNC1I2/AKAP9/CSNK1D/CEP135/MAPRE1/SSNA1/NDE1/HSP90AA1	17
R-HSA-193648	NRAGE signals death through JNK	14/2093	59/10654	0.258789	0.465405	0.293867	FGD2/FGD3/RAC1/AKAP13/ARHGEF1/ARHGEF10L/VAV1/ABR/GNA13/PREX1/ARHGEF2/ARHGEF3/BCL2L11/MAPK8	14
R-HSA-176033	Interactions of Vpr with host cellular proteins	9/2093	36/10654	0.26546	0.476765	0.30104	SLC25A6/HMGA1/BANF1/SLC25A5/NUP58/NUP62/NUP214/TPR/NUP98	9
R-HSA-6804114	TP53 Regulates Transcription of Genes Involved in G2 Cell Cycle Arrest	5/2093	18/10654	0.270253	0.480964	0.303692	PRMT1/BAX/RBL2/ZNF385A/GADD45A	5
R-HSA-73780	RNA Polymerase III Chain Elongation	5/2093	18/10654	0.270253	0.480964	0.303692	POLR2K/POLR2L/POLR2E/POLR1D/POLR2H	5
R-HSA-167160	RNA Pol II CTD phosphorylation and interaction with CE during HIV infection	7/2093	27/10654	0.270297	0.480964	0.303692	POLR2K/POLR2L/POLR2E/RNMT/POLR2C/POLR2H/MNAT1	7
R-HSA-264876	Insulin processing	7/2093	27/10654	0.270297	0.480964	0.303692	RAB27A/ERO1A/VAMP2/KIF5B/SLC30A7/EXOC5/MYO5A	7
R-HSA-5621480	Dectin-2 family	7/2093	27/10654	0.270297	0.480964	0.303692	SYK/LYN/FYN/FCER1G/CLEC4E/CLEC4D/CLEC4A	7
R-HSA-76066	RNA Polymerase III Transcription Initiation From Type 2 Promoter	7/2093	27/10654	0.270297	0.480964	0.303692	GTF3C6/POLR2K/POLR2L/POLR2E/POLR1D/POLR2H/BDP1	7
R-HSA-77075	RNA Pol II CTD phosphorylation and interaction with CE	7/2093	27/10654	0.270297	0.480964	0.303692	POLR2K/POLR2L/POLR2E/RNMT/POLR2C/POLR2H/MNAT1	7
R-HSA-73863	RNA Polymerase I Transcription Termination	8/2093	32/10654	0.28367	0.50046	0.316002	POLR2K/POLR2L/POLR2E/TAF1D/TWISTNB/POLR1D/POLR2H/MNAT1	8
R-HSA-167169	HIV Transcription Elongation	11/2093	46/10654	0.284332	0.50046	0.316002	TCEA1/POLR2K/ELOB/POLR2L/ELL/ELOC/POLR2E/POLR2C/POLR2H/MNAT1/ELOA	11
R-HSA-167200	Formation of HIV-1 elongation complex containing HIV-1 Tat	11/2093	46/10654	0.284332	0.50046	0.316002	TCEA1/POLR2K/ELOB/POLR2L/ELL/ELOC/POLR2E/POLR2C/POLR2H/MNAT1/ELOA	11
R-HSA-167246	Tat-mediated elongation of the HIV-1 transcript	11/2093	46/10654	0.284332	0.50046	0.316002	TCEA1/POLR2K/ELOB/POLR2L/ELL/ELOC/POLR2E/POLR2C/POLR2H/MNAT1/ELOA	11
R-HSA-1250347	SHC1 events in ERBB4 signaling	4/2093	14/10654	0.289592	0.50046	0.316002	GRB2/EREG/NRAS/KRAS	4
R-HSA-156581	Methylation	4/2093	14/10654	0.289592	0.50046	0.316002	MAT2A/TRMT112/GSTO1/COMT	4
R-HSA-169893	Prolonged ERK activation events	4/2093	14/10654	0.289592	0.50046	0.316002	RAPGEF1/MAP2K1/MAPK1/YWHAB	4
R-HSA-177504	Retrograde neurotrophin signalling	4/2093	14/10654	0.289592	0.50046	0.316002	AP2S1/CLTC/CLTA/AP2M1	4
R-HSA-180336	SHC1 events in EGFR signaling	4/2093	14/10654	0.289592	0.50046	0.316002	GRB2/EREG/NRAS/KRAS	4
R-HSA-2024101	CS/DS degradation	4/2093	14/10654	0.289592	0.50046	0.316002	IDS/VCAN/HEXB/HEXA	4
R-HSA-4839735	AXIN mutants destabilize the destruction complex, activating WNT signaling	4/2093	14/10654	0.289592	0.50046	0.316002	PPP2R5C/PPP2CB/PPP2CA/CSNK1A1	4
R-HSA-4839744	truncated APC mutants destabilize the destruction complex	4/2093	14/10654	0.289592	0.50046	0.316002	PPP2R5C/PPP2CB/PPP2CA/CSNK1A1	4
R-HSA-4839748	AMER1 mutants destabilize the destruction complex	4/2093	14/10654	0.289592	0.50046	0.316002	PPP2R5C/PPP2CB/PPP2CA/CSNK1A1	4
R-HSA-5358565	Mismatch repair (MMR) directed by MSH2:MSH6 (MutSalpha)	4/2093	14/10654	0.289592	0.50046	0.316002	POLD2/RPA3/POLD4/RPA2	4
R-HSA-5358606	Mismatch repair (MMR) directed by MSH2:MSH3 (MutSbeta)	4/2093	14/10654	0.289592	0.50046	0.316002	POLD2/RPA3/POLD4/RPA2	4
R-HSA-5467337	APC truncation mutants have impaired AXIN binding	4/2093	14/10654	0.289592	0.50046	0.316002	PPP2R5C/PPP2CB/PPP2CA/CSNK1A1	4
R-HSA-5467340	AXIN missense mutants destabilize the destruction complex	4/2093	14/10654	0.289592	0.50046	0.316002	PPP2R5C/PPP2CB/PPP2CA/CSNK1A1	4
R-HSA-5467348	Truncations of AMER1 destabilize the destruction complex	4/2093	14/10654	0.289592	0.50046	0.316002	PPP2R5C/PPP2CB/PPP2CA/CSNK1A1	4
R-HSA-69166	Removal of the Flap Intermediate	4/2093	14/10654	0.289592	0.50046	0.316002	POLD2/RPA3/POLD4/RPA2	4
R-HSA-8849471	PTK6 Regulates RHO GTPases, RAS GTPase and MAP kinases	4/2093	14/10654	0.289592	0.50046	0.316002	RAC1/RHOA/NRAS/KRAS	4
R-HSA-373753	Nephrin family interactions	6/2093	23/10654	0.289798	0.50046	0.316002	FYN/PIK3R1/IQGAP1/ACTN4/PIK3CB/ACTN1	6
R-HSA-400508	Incretin synthesis, secretion, and inactivation	6/2093	23/10654	0.289798	0.50046	0.316002	SEC11C/SPCS2/SPCS3/SEC11A/TCF7L2/CTNNB1	6
R-HSA-8956321	Nucleotide salvage	6/2093	23/10654	0.289798	0.50046	0.316002	TYMP/UPP1/APRT/AMPD3/ADA/DGUOK	6
R-HSA-380320	Recruitment of NuMA to mitotic centrosomes	21/2093	94/10654	0.291638	0.502991	0.3176	TUBA1B/DYNLL1/TUBA1C/TUBB4B/YWHAE/TUBB/OFD1/PAFAH1B1/TUBA1A/TUBB6/YWHAG/SDCCAG8/DYNC1I2/AKAP9/CSNK1D/TUBB2A/CEP135/MAPRE1/SSNA1/NDE1/HSP90AA1	21
R-HSA-8956319	Nucleobase catabolism	9/2093	37/10654	0.294367	0.506402	0.319754	ENTPD1/TYMP/NT5C3A/SAMHD1/UPP1/ADPRM/GPX1/DPYD/UPB1	9
R-HSA-9029569	NR1H3 & NR1H2 regulate gene expression linked to cholesterol transport and efflux	9/2093	37/10654	0.294367	0.506402	0.319754	ARL4C/APOC1/ABCA1/RXRA/NR1H3/ABCG1/NCOR2/TNRC6B/NCOA1	9
R-HSA-168253	Host Interactions with Influenza Factors	10/2093	42/10654	0.303137	0.519272	0.32788	SLC25A6/ISG15/NUP58/NUP62/NUP214/KPNA4/EIF2AK2/TPR/NUP98/PABPN1	10
R-HSA-202040	G-protein activation	7/2093	28/10654	0.304162	0.519272	0.32788	GNG7/GNG5/GNG2/GNAI2/GNB1/GNB4/GNB2	7
R-HSA-400042	Adrenaline,noradrenaline inhibits insulin secretion	7/2093	28/10654	0.304162	0.519272	0.32788	GNG7/GNG5/GNG2/GNAI2/GNB1/GNB4/GNB2	7
R-HSA-75067	Processing of Capped Intronless Pre-mRNA	7/2093	28/10654	0.304162	0.519272	0.32788	SNRPB/LSM10/SNRPG/SNRPE/SNRPF/PAPOLA/PABPN1	7
R-HSA-76061	RNA Polymerase III Transcription Initiation From Type 1 Promoter	7/2093	28/10654	0.304162	0.519272	0.32788	GTF3C6/POLR2K/POLR2L/POLR2E/POLR1D/POLR2H/BDP1	7
R-HSA-76071	RNA Polymerase III Transcription Initiation From Type 3 Promoter	7/2093	28/10654	0.304162	0.519272	0.32788	POLR2K/POLR2L/SNAPC1/POLR2E/POLR1D/POLR2H/BDP1	7
R-HSA-73762	RNA Polymerase I Transcription Initiation	11/2093	47/10654	0.310466	0.524577	0.331229	POLR2K/POLR2L/POLR2E/TAF1D/TWISTNB/POLR1D/POLR2H/MNAT1/RBBP4/CHD4/HDAC2	11
R-HSA-9024446	NR1H2 and NR1H3-mediated signaling	11/2093	47/10654	0.310466	0.524577	0.331229	ARL4C/APOC1/ABCA1/RXRA/NR1H3/ABCG1/NCOR2/TNRC6B/NCOA1/SCD/NRIP1	11
R-HSA-193697	p75NTR regulates axonogenesis	3/2093	10/10654	0.311478	0.524577	0.331229	RTN4/RHOA/ARHGDIA	3
R-HSA-418889	Caspase activation via Dependence Receptors in the absence of ligand	3/2093	10/10654	0.311478	0.524577	0.331229	APPL1/DAPK1/CASP3	3
R-HSA-419812	Calcitonin-like ligand receptors	3/2093	10/10654	0.311478	0.524577	0.331229	ADM/RAMP1/CALCRL	3
R-HSA-442380	Zinc influx into cells by the SLC39 gene family	3/2093	10/10654	0.311478	0.524577	0.331229	SLC39A8/SLC39A1/SLC39A7	3
R-HSA-74749	Signal attenuation	3/2093	10/10654	0.311478	0.524577	0.331229	GRB2/IRS2/MAPK1	3
R-HSA-8868766	rRNA processing in the mitochondrion	3/2093	10/10654	0.311478	0.524577	0.331229	HSD17B10/MTERF4/TRMT10C	3
R-HSA-8875656	MET receptor recycling	3/2093	10/10654	0.311478	0.524577	0.331229	GRB2/ARF6/RAB4B	3
R-HSA-3000480	Scavenging by Class A Receptors	5/2093	19/10654	0.312176	0.524577	0.331229	FTH1/CALR/HSP90B1/FTL/MARCO	5
R-HSA-6804760	Regulation of TP53 Activity through Methylation	5/2093	19/10654	0.312176	0.524577	0.331229	ATM/RPS27A/UBA52/UBB/UBC	5
R-HSA-8851708	Signaling by FGFR2 IIIa TM	5/2093	19/10654	0.312176	0.524577	0.331229	POLR2K/POLR2L/POLR2E/POLR2C/POLR2H	5
R-HSA-2990846	SUMOylation	40/2093	188/10654	0.312331	0.524577	0.331229	SMC6/PARP1/RORA/HIPK2/PARK7/SATB1/NPM1/NFKBIA/NFKB2/SUMO1/DDX5/MITF/RXRA/NR1H3/NUP58/NR4A2/NUP62/NCOR2/NUP214/SUMO3/TRIM28/SP100/RELA/H4C3/TPR/NOP58/NCOA1/TOP1/UBE2I/STAG2/NUP98/PPARA/NRIP1/ZBED1/HDAC2/TDG/RAD21/PML/SUMO2/HNRNPC	40
R-HSA-168274	Export of Viral Ribonucleoproteins from Nucleus	8/2093	33/10654	0.315216	0.527448	0.333043	RAN/NUP58/NUP62/NUP214/TPR/NUP98/HSPA1A/XPO1	8
R-HSA-4085001	Sialic acid metabolism	8/2093	33/10654	0.315216	0.527448	0.333043	ST6GALNAC4/ST6GAL1/NPL/NANS/CTSA/NEU1/ST6GALNAC6/ST8SIA4	8
R-HSA-9022692	Regulation of MECP2 expression and activity	8/2093	33/10654	0.315216	0.527448	0.333043	HIPK2/CALM2/CAMK4/CALM1/NCOR2/TNRC6B/HDAC2/CALM3	8
R-HSA-445717	Aquaporin-mediated transport	12/2093	52/10654	0.316687	0.529252	0.334182	GNG7/GNG5/GNG2/GNB1/PRKAR1A/AQP9/GNB4/GNB2/PRKAR2A/GNAS/PRKACB/RAB11A	12
R-HSA-8864260	Transcriptional regulation by the AP-2 (TFAP2) family of transcription factors	9/2093	38/10654	0.32401	0.54082	0.341486	HSPD1/NPM1/CDKN1A/MYC/SUMO1/VEGFA/CITED2/DEK/UBE2I	9
R-HSA-8986944	Transcriptional Regulation by MECP2	14/2093	62/10654	0.326677	0.544056	0.343529	MEF2C/PTPN1/HIPK2/CALM2/CAMK4/CALM1/SLC2A3/SGK1/PTPN4/IRAK1/NCOR2/TNRC6B/HDAC2/CALM3	14
R-HSA-193368	Synthesis of bile acids and bile salts via 7alpha-hydroxycholesterol	6/2093	24/10654	0.327564	0.544056	0.343529	SCP2/CYP27A1/RXRA/HSD17B4/AKR1C3/NCOA1	6
R-HSA-75876	Synthesis of very long-chain fatty acyl-CoAs	6/2093	24/10654	0.327564	0.544056	0.343529	HSD17B12/TECR/ACSL1/ACSL4/ACSL5/ELOVL1	6
R-HSA-9634638	Estrogen-dependent nuclear events downstream of ESR-membrane signaling	6/2093	24/10654	0.327564	0.544056	0.343529	BCL2/EREG/FOS/FOXO3/MAPK1/XPO1	6
R-HSA-2219528	PI3K/AKT Signaling in Cancer	22/2093	101/10654	0.330814	0.548713	0.34647	CD19/CD86/GRB2/LCK/FYN/TRAT1/ICOS/RAC2/PIK3R1/PIK3AP1/CDKN1A/RAC1/RHOG/EREG/SRC/CD80/PIK3CB/IRS2/VAV1/FOXO3/AKT1S1/RPS6KB2	22
R-HSA-168325	Viral Messenger RNA Synthesis	10/2093	43/10654	0.331183	0.548713	0.34647	POLR2K/POLR2L/NUP58/NUP62/NUP214/POLR2E/TPR/POLR2C/POLR2H/NUP98	10
R-HSA-167152	Formation of HIV elongation complex in the absence of HIV Tat	11/2093	48/10654	0.337148	0.555865	0.350986	TCEA1/POLR2K/ELOB/POLR2L/ELL/ELOC/POLR2E/POLR2C/POLR2H/MNAT1/ELOA	11
R-HSA-193807	Synthesis of bile acids and bile salts via 27-hydroxycholesterol	4/2093	15/10654	0.338514	0.555865	0.350986	CYP27A1/RXRA/AKR1C3/NCOA1	4
R-HSA-372708	p130Cas linkage to MAPK signaling for integrins	4/2093	15/10654	0.338514	0.555865	0.350986	TLN1/RAP1B/SRC/APBB1IP	4
R-HSA-5358508	Mismatch Repair	4/2093	15/10654	0.338514	0.555865	0.350986	POLD2/RPA3/POLD4/RPA2	4
R-HSA-69183	Processive synthesis on the lagging strand	4/2093	15/10654	0.338514	0.555865	0.350986	POLD2/RPA3/POLD4/RPA2	4
R-HSA-71336	Pentose phosphate pathway	4/2093	15/10654	0.338514	0.555865	0.350986	TALDO1/PGD/G6PD/TKT	4
R-HSA-975577	N-Glycan antennae elongation	4/2093	15/10654	0.338514	0.555865	0.350986	ST6GAL1/MGAT4A/B4GALT5/B4GALT1	4
R-HSA-72086	mRNA Capping	7/2093	29/10654	0.338801	0.555865	0.350986	POLR2K/POLR2L/POLR2E/RNMT/POLR2C/POLR2H/MNAT1	7
R-HSA-72187	mRNA 3'-end processing	13/2093	58/10654	0.346492	0.567792	0.358517	THOC6/SRSF3/RNPS1/SRSF9/SRSF5/PAPOLA/SRSF7/SRRM1/MAGOHB/FYTTD1/SRSF4/PABPN1/U2AF1	13
R-HSA-4085377	SUMOylation of SUMOylation proteins	8/2093	34/10654	0.347395	0.567889	0.358578	SUMO1/NUP58/NUP62/NUP214/TPR/UBE2I/NUP98/SUMO2	8
R-HSA-70263	Gluconeogenesis	8/2093	34/10654	0.347395	0.567889	0.358578	TPI1/PGAM1/GAPDH/ALDOA/PGK1/ENO1/FBP1/ALDOC	8
R-HSA-390471	Association of TriC/CCT with target proteins during biosynthesis	9/2093	39/10654	0.354187	0.577278	0.364506	CCT5/CCT6A/CCT3/STAT3/SPHK1/FBXW5/FBXL5/FBXO6/CCT7	9
R-HSA-2022870	Chondroitin sulfate biosynthesis	5/2093	20/10654	0.354852	0.577278	0.364506	CHST12/VCAN/CSGALNACT2/CHST11/CHSY1	5
R-HSA-3232118	SUMOylation of transcription factors	5/2093	20/10654	0.354852	0.577278	0.364506	SUMO1/MITF/SUMO3/UBE2I/SUMO2	5
R-HSA-69186	Lagging Strand Synthesis	5/2093	20/10654	0.354852	0.577278	0.364506	POLD2/RPA3/POLD4/RFC1/RPA2	5
R-HSA-68875	Mitotic Prophase	30/2093	142/10654	0.359666	0.584402	0.369005	PRKCB/ARPP19/VRK2/SET/BANF1/ENSA/H2BC12/H3-3A/H2AZ1/H3-3B/RAB1A/LMNA/PPP2CB/NUP58/NUP62/RB1/H2AJ/NUP214/PPP2CA/RAB2A/CTDNEP1/H4C3/LPIN2/TPR/LPIN1/MAPK1/LMNB1/NUP98/EMD/H2AZ2	30
R-HSA-1296041	Activation of G protein gated Potassium channels	6/2093	25/10654	0.365903	0.592393	0.374051	GNG7/GNG5/GNG2/GNB1/KCNJ2/GNB2	6
R-HSA-1296059	G protein gated Potassium channels	6/2093	25/10654	0.365903	0.592393	0.374051	GNG7/GNG5/GNG2/GNB1/KCNJ2/GNB2	6
R-HSA-997272	Inhibition of voltage gated Ca2+ channels via Gbeta/gamma subunits	6/2093	25/10654	0.365903	0.592393	0.374051	GNG7/GNG5/GNG2/GNB1/KCNJ2/GNB2	6
R-HSA-5620924	Intraflagellar transport	12/2093	54/10654	0.368045	0.593206	0.374563	TUBA1B/IFT57/DYNLL1/TUBA1C/TUBB4B/TUBA1A/TUBB6/DYNLRB1/HSPB11/TUBB2A/TNPO1/KIF3B	12
R-HSA-111458	Formation of apoptosome	3/2093	11/10654	0.370809	0.593206	0.374563	CYCS/XIAP/MAPK1	3
R-HSA-196791	Vitamin D (calciferol) metabolism	3/2093	11/10654	0.370809	0.593206	0.374563	UBE2I/LGMN/SUMO2	3
R-HSA-351906	Apoptotic cleavage of cell adhesion proteins	3/2093	11/10654	0.370809	0.593206	0.374563	TJP2/CTNNB1/CASP3	3
R-HSA-376172	DSCAM interactions	3/2093	11/10654	0.370809	0.593206	0.374563	RAC1/PAK1/MAPK8	3
R-HSA-77286	mitochondrial fatty acid beta-oxidation of saturated fatty acids	3/2093	11/10654	0.370809	0.593206	0.374563	ACADM/ECHS1/ACADVL	3
R-HSA-8851805	MET activates RAS signaling	3/2093	11/10654	0.370809	0.593206	0.374563	GRB2/NRAS/KRAS	3
R-HSA-8934903	Receptor Mediated Mitophagy	3/2093	11/10654	0.370809	0.593206	0.374563	SRC/MAP1LC3B/ATG12	3
R-HSA-9028731	Activated NTRK2 signals through FRS2 and FRS3	3/2093	11/10654	0.370809	0.593206	0.374563	GRB2/NRAS/KRAS	3
R-HSA-9627069	Regulation of the apoptosome activity	3/2093	11/10654	0.370809	0.593206	0.374563	CYCS/XIAP/MAPK1	3
R-HSA-174824	Plasma lipoprotein assembly, remodeling, and clearance	15/2093	69/10654	0.376445	0.601507	0.379805	NPC2/P4HB/FURIN/AP2S1/APOC1/ABCA1/NR1H3/ABCG1/LIPA/CLTC/APOBR/CLTA/HDLBP/PRKACB/AP2M1	15
R-HSA-168276	NS1 Mediated Effects on Host Pathways	9/2093	40/10654	0.384698	0.613967	0.387673	ISG15/NUP58/NUP62/NUP214/KPNA4/EIF2AK2/TPR/NUP98/PABPN1	9
R-HSA-139853	Elevation of cytosolic Ca2+ levels	4/2093	16/10654	0.387659	0.616501	0.389273	ORAI2/P2RX4/P2RX7/ITPR2	4
R-HSA-189445	Metabolism of porphyrins	4/2093	16/10654	0.387659	0.616501	0.389273	HMOX1/BLVRB/BLVRA/ALAS1	4
R-HSA-1963640	GRB2 events in ERBB2 signaling	4/2093	16/10654	0.387659	0.616501	0.389273	GRB2/EREG/NRAS/KRAS	4
R-HSA-4615885	SUMOylation of DNA replication proteins	10/2093	45/10654	0.388492	0.617097	0.389649	SUMO1/NUP58/NUP62/NUP214/SUMO3/TPR/TOP1/UBE2I/NUP98/SUMO2	10
R-HSA-1793185	Chondroitin sulfate/dermatan sulfate metabolism	11/2093	50/10654	0.391586	0.621279	0.39229	IDS/CHST12/VCAN/DSE/SDC2/SDC4/HEXB/CSGALNACT2/CHST11/CHSY1/HEXA	11
R-HSA-5620916	VxPx cargo-targeting to cilium	5/2093	21/10654	0.397723	0.630111	0.397867	RAB8A/ASAP1/ARF4/EXOC5/RAB11A	5
R-HSA-6796648	TP53 Regulates Transcription of DNA Repair Genes	14/2093	65/10654	0.398088	0.630111	0.397867	TCEA1/ATM/POLR2K/ELOB/POLR2L/FOS/JUN/ELL/ELOC/POLR2E/POLR2C/POLR2H/MNAT1/ELOA	14
R-HSA-159236	Transport of Mature mRNA derived from an Intron-Containing Transcript	16/2093	75/10654	0.400929	0.633863	0.400236	THOC6/SRSF3/RNPS1/NUP58/NUP62/SRSF9/NUP214/SRSF5/SRSF7/SRRM1/TPR/MAGOHB/FYTTD1/NUP98/SRSF4/U2AF1	16
R-HSA-9616222	Transcriptional regulation of granulopoiesis	19/2093	90/10654	0.403845	0.637724	0.402673	CDK4/LEF1/H2BC12/H3-3A/H2AZ1/H3-3B/CDKN1A/MYC/STAT3/CEBPB/CSF3R/RXRA/RUNX1/IL6R/H2AJ/DEK/H4C3/H2AZ2/PML	19
R-HSA-168333	NEP/NS2 Interacts with the Cellular Export Machinery	7/2093	31/10654	0.409164	0.644612	0.407023	RAN/NUP58/NUP62/NUP214/TPR/NUP98/XPO1	7
R-HSA-196807	Nicotinate metabolism	7/2093	31/10654	0.409164	0.644612	0.407023	PARP14/NMRK1/CD38/NAMPT/PARP8/PTGS2/NADK	7
R-HSA-1266695	Interleukin-7 signaling	8/2093	36/10654	0.412675	0.647117	0.408604	IL7R/PIK3R1/IL2RG/JAK1/STAT3/IRS2/SOCS2/STAT5A	8
R-HSA-156590	Glutathione conjugation	8/2093	36/10654	0.412675	0.647117	0.408604	AKR1A1/CNDP2/GSTP1/GSTK1/GSTO1/MGST1/MGST3/ESD	8
R-HSA-177243	Interactions of Rev with host cellular proteins	8/2093	36/10654	0.412675	0.647117	0.408604	RAN/NPM1/NUP58/NUP62/NUP214/TPR/NUP98/XPO1	8
R-HSA-76046	RNA Polymerase III Transcription Initiation	8/2093	36/10654	0.412675	0.647117	0.408604	GTF3C6/POLR2K/POLR2L/SNAPC1/POLR2E/POLR1D/POLR2H/BDP1	8
R-HSA-8853659	RET signaling	9/2093	41/10654	0.415348	0.650551	0.410773	GRB2/PIK3R1/DOK2/SRC/GAB2/PIK3CB/PDLIM7/IRS2/PRKACB	9
R-HSA-1660662	Glycosphingolipid metabolism	10/2093	46/10654	0.417425	0.653045	0.412347	PSAP/ASAH1/GM2A/HEXB/GLA/CTSA/UGCG/NEU1/SUMF2/HEXA	10
R-HSA-5250924	B-WICH complex positively regulates rRNA expression	19/2093	91/10654	0.424409	0.662974	0.418617	ACTB/DDX21/H2BC12/H3-3A/H2AZ1/H3-3B/POLR2K/POLR2L/H2AJ/DEK/SMARCA5/POLR2E/TAF1D/H4C3/TWISTNB/POLR1D/POLR2H/MYO1C/H2AZ2	19
R-HSA-5250913	Positive epigenetic regulation of rRNA expression	22/2093	106/10654	0.424756	0.662974	0.418617	ACTB/DDX21/H2BC12/H3-3A/H2AZ1/H3-3B/POLR2K/POLR2L/H2AJ/DEK/SMARCA5/POLR2E/TAF1D/H4C3/TWISTNB/POLR1D/POLR2H/RBBP4/CHD4/MYO1C/H2AZ2/HDAC2	22
R-HSA-196108	Pregnenolone biosynthesis	3/2093	12/10654	0.429083	0.665104	0.419962	TSPO/STARD3NL/STARD4	3
R-HSA-451306	Ionotropic activity of kainate receptors	3/2093	12/10654	0.429083	0.665104	0.419962	CALM2/CALM1/CALM3	3
R-HSA-451308	Activation of Ca-permeable Kainate Receptor	3/2093	12/10654	0.429083	0.665104	0.419962	CALM2/CALM1/CALM3	3
R-HSA-73817	Purine ribonucleoside monophosphate biosynthesis	3/2093	12/10654	0.429083	0.665104	0.419962	IMPDH2/PAICS/IMPDH1	3
R-HSA-8851680	Butyrophilin (BTN) family interactions	3/2093	12/10654	0.429083	0.665104	0.419962	BTN3A2/BTN3A1/BTN2A2	3
R-HSA-933543	NF-kB activation through FADD/RIP-1 pathway mediated by caspase-8 and -10	3/2093	12/10654	0.429083	0.665104	0.419962	TRIM25/CASP8/IFIH1	3
R-HSA-164378	PKA activation in glucagon signalling	4/2093	17/10654	0.436267	0.67314	0.425036	PRKAR1A/PRKAR2A/GNAS/PRKACB	4
R-HSA-196757	Metabolism of folate and pterines	4/2093	17/10654	0.436267	0.67314	0.425036	SHMT2/MTHFD2/FPGS/MTHFS	4
R-HSA-3781860	Diseases associated with N-glycosylation of proteins	4/2093	17/10654	0.436267	0.67314	0.425036	ALG13/B4GALT1/ALG2/MGAT2	4
R-HSA-9022699	MECP2 regulates neuronal receptors and channels	4/2093	17/10654	0.436267	0.67314	0.425036	PTPN1/SLC2A3/PTPN4/HDAC2	4
R-HSA-1250196	SHC1 events in ERBB2 signaling	5/2093	22/10654	0.440282	0.677783	0.427967	GRB2/EREG/PTPN12/NRAS/KRAS	5
R-HSA-442982	Ras activation upon Ca2+ influx through NMDA receptor	5/2093	22/10654	0.440282	0.677783	0.427967	CALM2/CALM1/NRAS/KRAS/CALM3	5
R-HSA-211976	Endogenous sterols	6/2093	27/10654	0.442736	0.680783	0.429862	CYP1B1/CYP27A1/ARNT2/RXRA/AHR/NCOA1	6
R-HSA-75105	Fatty acyl-CoA biosynthesis	8/2093	37/10654	0.445311	0.681645	0.430406	HSD17B12/TECR/ACSL1/ACSL4/ACSL5/PPT1/SCD/ELOVL1	8
R-HSA-380270	Recruitment of mitotic centrosome proteins and complexes	17/2093	82/10654	0.445677	0.681645	0.430406	DYNLL1/TUBB4B/YWHAE/TUBB/OFD1/PAFAH1B1/TUBA1A/YWHAG/SDCCAG8/DYNC1I2/AKAP9/CSNK1D/CEP135/MAPRE1/SSNA1/NDE1/HSP90AA1	17
R-HSA-380287	Centrosome maturation	17/2093	82/10654	0.445677	0.681645	0.430406	DYNLL1/TUBB4B/YWHAE/TUBB/OFD1/PAFAH1B1/TUBA1A/YWHAG/SDCCAG8/DYNC1I2/AKAP9/CSNK1D/CEP135/MAPRE1/SSNA1/NDE1/HSP90AA1	17
R-HSA-1489509	DAG and IP3 signaling	9/2093	42/10654	0.445951	0.681645	0.430406	CALM2/CAMK4/CALM1/PRKAR1A/AHCYL1/ITPR2/PRKAR2A/PRKACB/CALM3	9
R-HSA-3108214	SUMOylation of DNA damage response and repair proteins	16/2093	77/10654	0.445964	0.681645	0.430406	SMC6/PARP1/SUMO1/NUP58/NUP62/NUP214/SUMO3/SP100/TPR/UBE2I/STAG2/NUP98/TDG/RAD21/PML/SUMO2	16
R-HSA-4570464	SUMOylation of RNA binding proteins	10/2093	47/10654	0.446333	0.681645	0.430406	SUMO1/NUP58/NUP62/NUP214/TPR/NOP58/UBE2I/NUP98/SUMO2/HNRNPC	10
R-HSA-8957275	Post-translational protein phosphorylation	22/2093	108/10654	0.462945	0.706214	0.44592	PDIA6/LGALS1/MGAT4A/TIMP1/P4HB/DNAJC3/HSP90B1/IL6/SPP1/SERPINA1/VCAN/CST3/SDC2/APLP2/CKAP4/RCN1/CALU/QSOX1/APP/ADAM10/GAS6/KTN1	22
R-HSA-5620912	Anchoring of the basal body to the plasma membrane	20/2093	98/10654	0.46469	0.708073	0.447094	DYNLL1/TUBB4B/YWHAE/TUBB/OFD1/PAFAH1B1/RAB8A/SEPTIN2/TUBA1A/YWHAG/SDCCAG8/DYNC1I2/AKAP9/CSNK1D/CEP135/MAPRE1/SSNA1/NDE1/RAB11A/HSP90AA1	20
R-HSA-167172	Transcription of the HIV genome	15/2093	73/10654	0.46946	0.714535	0.451173	TCEA1/GTF2A2/TAF7/POLR2K/ELOB/POLR2L/ELL/TAF13/ELOC/POLR2E/RNMT/POLR2C/POLR2H/MNAT1/ELOA	15
R-HSA-5655253	Signaling by FGFR2 in disease	9/2093	43/10654	0.476331	0.723417	0.456782	GRB2/PIK3R1/POLR2K/POLR2L/NRAS/POLR2E/POLR2C/POLR2H/KRAS	9
R-HSA-111996	Ca-dependent events	8/2093	38/10654	0.477658	0.723417	0.456782	CALM2/CAMK4/CALM1/PRKAR1A/PRKAR2A/PRKACB/MAPK1/CALM3	8
R-HSA-3232142	SUMOylation of ubiquitinylation proteins	8/2093	38/10654	0.477658	0.723417	0.456782	SUMO1/NUP58/NUP62/NUP214/TPR/UBE2I/NUP98/PML	8
R-HSA-180746	Nuclear import of Rev protein	7/2093	33/10654	0.479055	0.723417	0.456782	RAN/NPM1/NUP58/NUP62/NUP214/TPR/NUP98	7
R-HSA-180910	Vpr-mediated nuclear import of PICs	7/2093	33/10654	0.479055	0.723417	0.456782	HMGA1/BANF1/NUP58/NUP62/NUP214/TPR/NUP98	7
R-HSA-418990	Adherens junctions interactions	7/2093	33/10654	0.479055	0.723417	0.456782	ACTB/ACTG1/NECTIN2/CTNNA1/CTNND1/CTNNB1/PVR	7
R-HSA-420092	Glucagon-type ligand receptors	7/2093	33/10654	0.479055	0.723417	0.456782	GNG7/GNG5/GNG2/GNB1/GNB4/GNB2/GNAS	7
R-HSA-167242	Abortive elongation of HIV-1 transcript in the absence of Tat	5/2093	23/10654	0.482083	0.725495	0.458094	POLR2K/POLR2L/POLR2E/POLR2C/POLR2H	5
R-HSA-73980	RNA Polymerase III Transcription Termination	5/2093	23/10654	0.482083	0.725495	0.458094	POLR2K/POLR2L/POLR2E/POLR1D/POLR2H	5
R-HSA-1660514	Synthesis of PIPs at the Golgi membrane	4/2093	18/10654	0.483699	0.725495	0.458094	PIKFYVE/ARF1/VAC14/ARF3	4
R-HSA-5609975	Diseases associated with glycosylation precursor biosynthesis	4/2093	18/10654	0.483699	0.725495	0.458094	CTSA/NUS1/NEU1/PGM1	4
R-HSA-8963898	Plasma lipoprotein assembly	4/2093	18/10654	0.483699	0.725495	0.458094	P4HB/APOC1/ABCA1/PRKACB	4
R-HSA-113501	Inhibition of replication initiation of damaged DNA by RB1/E2F1	3/2093	13/10654	0.485279	0.725495	0.458094	PPP2CB/RB1/PPP2CA	3
R-HSA-2022857	Keratan sulfate degradation	3/2093	13/10654	0.485279	0.725495	0.458094	GNS/HEXB/HEXA	3
R-HSA-2168880	Scavenging of heme from plasma	3/2093	13/10654	0.485279	0.725495	0.458094	JCHAIN/LRP1/CD163	3
R-HSA-75109	Triglyceride biosynthesis	3/2093	13/10654	0.485279	0.725495	0.458094	GK/LPIN2/LPIN1	3
R-HSA-72202	Transport of Mature Transcript to Cytoplasm	17/2093	84/10654	0.48917	0.730501	0.461255	THOC6/SRSF3/EIF4E/RNPS1/NUP58/NUP62/SRSF9/NUP214/SRSF5/SRSF7/SRRM1/TPR/MAGOHB/FYTTD1/NUP98/SRSF4/U2AF1	17
R-HSA-6807505	RNA polymerase II transcribes snRNA genes	15/2093	74/10654	0.492579	0.734777	0.463955	POU2F2/GTF2A2/POLR2K/POLR2L/NABP1/ELL2/ELL/TAF13/SNAPC1/POLR2E/ZC3H8/INTS10/POLR2C/POLR2H/RPAP2	15
R-HSA-112043	PLC beta mediated events	11/2093	54/10654	0.500924	0.7464	0.471294	CALM2/CAMK4/CALM1/GNAI2/PRKAR1A/AHCYL1/ITPR2/PRKAR2A/PRKACB/MAPK1/CALM3	11
R-HSA-76009	Platelet Aggregation (Plug Formation)	8/2093	39/10654	0.509522	0.758371	0.478853	SYK/GRB2/PTPN1/RASGRP1/TLN1/RAP1B/SRC/APBB1IP	8
R-HSA-165054	Rev-mediated nuclear export of HIV RNA	7/2093	34/10654	0.51319	0.761307	0.480706	RAN/NUP58/NUP62/NUP214/TPR/NUP98/XPO1	7
R-HSA-192105	Synthesis of bile acids and bile salts	7/2093	34/10654	0.51319	0.761307	0.480706	SCP2/CYP27A1/RXRA/HSD17B4/AKR1C3/NCOA1/OSBPL9	7
R-HSA-4791275	Signaling by WNT in cancer	7/2093	34/10654	0.51319	0.761307	0.480706	PPP2R5C/PPP2CB/TCF7L2/CTNNB1/PPP2CA/TNKS2/CSNK1A1	7
R-HSA-5601884	PIWI-interacting RNA (piRNA) biogenesis	6/2093	29/10654	0.517502	0.766017	0.48368	POLR2K/POLR2L/POLR2E/POLR2C/POLR2H/HSP90AA1	6
R-HSA-933541	TRAF6 mediated IRF7 activation	6/2093	29/10654	0.517502	0.766017	0.48368	TANK/IRF7/IRF3/TBK1/TRIM25/IFIH1	6
R-HSA-174417	Telomere C-strand (Lagging Strand) Synthesis	5/2093	24/10654	0.522746	0.772082	0.48751	POLD2/RPA3/POLD4/RFC1/RPA2	5
R-HSA-210500	Glutamate Neurotransmitter Release Cycle	5/2093	24/10654	0.522746	0.772082	0.48751	VAMP2/SLC1A3/SLC38A2/GLS/ARL6IP5	5
R-HSA-112040	G-protein mediated events	11/2093	55/10654	0.52762	0.776857	0.490525	CALM2/CAMK4/CALM1/GNAI2/PRKAR1A/AHCYL1/ITPR2/PRKAR2A/PRKACB/MAPK1/CALM3	11
R-HSA-176407	Conversion from APC/C:Cdc20 to APC/C:Cdh1 in late anaphase	4/2093	19/10654	0.529439	0.776857	0.490525	ANAPC11/UBE2D1/UBE2E1/ANAPC16	4
R-HSA-176412	Phosphorylation of the APC/C	4/2093	19/10654	0.529439	0.776857	0.490525	ANAPC11/UBE2D1/UBE2E1/ANAPC16	4
R-HSA-197264	Nicotinamide salvaging	4/2093	19/10654	0.529439	0.776857	0.490525	PARP14/NAMPT/PARP8/PTGS2	4
R-HSA-70895	Branched-chain amino acid catabolism	4/2093	19/10654	0.529439	0.776857	0.490525	HSD17B10/PPM1K/BCAT1/BCKDK	4
R-HSA-9018678	Biosynthesis of specialized proresolving mediators (SPMs)	4/2093	19/10654	0.529439	0.776857	0.490525	LTA4H/ALOX5AP/GPX4/PTGS2	4
R-HSA-373752	Netrin-1 signaling	10/2093	50/10654	0.531459	0.778438	0.491523	EZR/FYN/RAC1/CDC42/SRC/PITPNA/SIAH2/PAK1/ABLIM1/MAPK8	10
R-HSA-983231	Factors involved in megakaryocyte development and platelet production	33/2093	168/10654	0.531672	0.778438	0.491523	TUBA1B/ACTB/TUBA1C/TUBB4B/CAPZA1/JMJD1C/H3-3A/KIF2A/H3-3B/RAC1/EHD1/PRKAR1A/CDC42/IRF1/TUBA1A/TUBB6/DOCK4/MAFF/KIF1B/JAK2/KIF5B/CAPZA2/PRKAR2A/RAB5A/PRKACB/DOCK10/TUBB2A/SH2B3/MAFG/KIF3B/AK3/HDAC2/CAPZB	33
R-HSA-162658	Golgi Cisternae Pericentriolar Stack Reorganization	3/2093	14/10654	0.538649	0.781011	0.493148	RAB1A/RAB2A/MAPK1	3
R-HSA-174411	Polymerase switching on the C-strand of the telomere	3/2093	14/10654	0.538649	0.781011	0.493148	POLD2/POLD4/RFC1	3
R-HSA-399955	SEMA3A-Plexin repulsion signaling by inhibiting Integrin adhesion	3/2093	14/10654	0.538649	0.781011	0.493148	FYN/TLN1/RAC1	3
R-HSA-428540	Activation of RAC1	3/2093	14/10654	0.538649	0.781011	0.493148	RAC1/PAK1/PAK2	3
R-HSA-6803205	TP53 regulates transcription of several additional cell death genes whose specific roles in p53-dependent apoptosis remain uncertain	3/2093	14/10654	0.538649	0.781011	0.493148	NDRG1/BCL6/BCL2L14	3
R-HSA-6804116	TP53 Regulates Transcription of Genes Involved in G1 Cell Cycle Arrest	3/2093	14/10654	0.538649	0.781011	0.493148	CDKN1A/ZNF385A/ARID3A	3
R-HSA-69091	Polymerase switching	3/2093	14/10654	0.538649	0.781011	0.493148	POLD2/POLD4/RFC1	3
R-HSA-69109	Leading Strand Synthesis	3/2093	14/10654	0.538649	0.781011	0.493148	POLD2/POLD4/RFC1	3
R-HSA-8941856	RUNX3 regulates NOTCH signaling	3/2093	14/10654	0.538649	0.781011	0.493148	RUNX3/RBPJ/MAML2	3
R-HSA-180786	Extension of Telomeres	6/2093	30/10654	0.553402	0.800679	0.505567	NHP2/POLD2/RPA3/POLD4/RFC1/RPA2	6
R-HSA-6804758	Regulation of TP53 Activity through Acetylation	6/2093	30/10654	0.553402	0.800679	0.505567	PIP4K2A/MEAF6/RBBP4/CHD4/HDAC2/PML	6
R-HSA-1500620	Meiosis	23/2093	118/10654	0.554064	0.800778	0.505629	STAG3/SYNE2/BRCA2/RPA3/CDK4/H2BC12/H3-3A/H2AZ1/ATM/H3-3B/NBN/SYNE1/SUN2/LMNA/H2AJ/H4C3/RPA2/TINF2/UBE2I/STAG2/LMNB1/H2AZ2/RAD21	23
R-HSA-212165	Epigenetic regulation of gene expression	29/2093	149/10654	0.555677	0.802247	0.506557	ACTB/DDX21/H2BC12/H3-3A/H2AZ1/H3-3B/POLR2K/POLR2L/MBD2/TET2/H2AJ/DEK/SMARCA5/JARID2/POLR2E/TAF1D/H4C3/TWISTNB/POLR1D/POLR2H/MNAT1/ARID4B/RBBP4/CHD4/MYO1C/EZH2/H2AZ2/HDAC2/TDG	29
R-HSA-9013508	NOTCH3 Intracellular Domain Regulates Transcription	5/2093	25/10654	0.561957	0.810445	0.511733	IKZF1/RBPJ/PLXND1/MAML2/STAT1	5
R-HSA-5685942	HDR through Homologous Recombination (HRR)	13/2093	67/10654	0.569057	0.819807	0.517645	POLD2/BRCA2/RPA3/POLD4/ATM/RPS27A/UBA52/UBB/NBN/UBC/RFC1/RPA2/RAD9A	13
R-HSA-983712	Ion channel transport	36/2093	186/10654	0.569824	0.820035	0.517788	ATP2B1/ATP6V0E1/ATP6V0D1/SRI/CALM2/CALM1/RPS27A/UBA52/UBB/STOM/ATP6V0B/ATP6V1F/UBC/SGK1/ATP1B3/ATP6AP1/C8orf44-SGK3/ATP6V1B2/ATP6V1A/ANO6/ATP6V0A1/ATP2A2/TCIRG1/CLCN7/ATP6V1C1/ATP2C1/MCOLN2/OSTM1/ATP6V1D/ATP6V1E1/ATP6V1G1/ATP2B4/CLIC2/ATP11C/FXYD2/CALM3	36
R-HSA-74158	RNA Polymerase III Transcription	8/2093	41/10654	0.571123	0.820152	0.517863	GTF3C6/POLR2K/POLR2L/SNAPC1/POLR2E/POLR1D/POLR2H/BDP1	8
R-HSA-749476	RNA Polymerase III Abortive And Retractive Initiation	8/2093	41/10654	0.571123	0.820152	0.517863	GTF3C6/POLR2K/POLR2L/SNAPC1/POLR2E/POLR1D/POLR2H/BDP1	8
R-HSA-141405	Inhibition of the proteolytic activity of APC/C required for the onset of anaphase by mitotic spindle checkpoint components	4/2093	20/10654	0.573086	0.82122	0.518537	ANAPC11/UBE2D1/UBE2E1/ANAPC16	4
R-HSA-141430	Inactivation of APC/C via direct inhibition of the APC/C complex	4/2093	20/10654	0.573086	0.82122	0.518537	ANAPC11/UBE2D1/UBE2E1/ANAPC16	4
R-HSA-111933	Calmodulin induced events	7/2093	36/10654	0.578799	0.826768	0.52204	CALM2/CAMK4/CALM1/PRKAR1A/PRKAR2A/PRKACB/CALM3	7
R-HSA-111997	CaM pathway	7/2093	36/10654	0.578799	0.826768	0.52204	CALM2/CAMK4/CALM1/PRKAR1A/PRKAR2A/PRKACB/CALM3	7
R-HSA-190861	Gap junction assembly	7/2093	36/10654	0.578799	0.826768	0.52204	TUBA1B/TUBA1C/TUBB4B/TUBA1A/TUBB6/GJB2/TUBB2A	7
R-HSA-936837	Ion transport by P-type ATPases	11/2093	57/10654	0.579485	0.826871	0.522105	ATP2B1/SRI/CALM2/CALM1/ATP1B3/ATP2A2/ATP2C1/ATP2B4/ATP11C/FXYD2/CALM3	11
R-HSA-381426	Regulation of Insulin-like Growth Factor (IGF) transport and uptake by Insulin-like Growth Factor Binding Proteins (IGFBPs)	24/2093	125/10654	0.58619	0.833195	0.526098	KLK1/PDIA6/LGALS1/MGAT4A/TIMP1/GZMH/P4HB/DNAJC3/HSP90B1/IL6/SPP1/SERPINA1/VCAN/CST3/SDC2/APLP2/CKAP4/RCN1/CALU/QSOX1/APP/ADAM10/GAS6/KTN1	24
R-HSA-1296065	Inwardly rectifying K+ channels	6/2093	31/10654	0.588019	0.833195	0.526098	GNG7/GNG5/GNG2/GNB1/KCNJ2/GNB2	6
R-HSA-70268	Pyruvate metabolism	6/2093	31/10654	0.588019	0.833195	0.526098	LDHB/VDAC1/SLC16A3/LDHA/BSG/RXRA	6
R-HSA-2032785	YAP1- and WWTR1 (TAZ)-stimulated gene expression	3/2093	15/10654	0.588682	0.833195	0.526098	HIPK2/HIPK1/RUNX2	3
R-HSA-391903	Eicosanoid ligand-binding receptors	3/2093	15/10654	0.588682	0.833195	0.526098	CYSLTR1/PTGER4/PTGIR	3
R-HSA-75892	Platelet Adhesion to exposed collagen	3/2093	15/10654	0.588682	0.833195	0.526098	LYN/FYN/FCER1G	3
R-HSA-8956320	Nucleobase biosynthesis	3/2093	15/10654	0.588682	0.833195	0.526098	IMPDH2/PAICS/IMPDH1	3
R-HSA-167161	HIV Transcription Initiation	9/2093	47/10654	0.592576	0.833195	0.526098	GTF2A2/TAF7/POLR2K/POLR2L/TAF13/POLR2E/POLR2C/POLR2H/MNAT1	9
R-HSA-167162	RNA Polymerase II HIV Promoter Escape	9/2093	47/10654	0.592576	0.833195	0.526098	GTF2A2/TAF7/POLR2K/POLR2L/TAF13/POLR2E/POLR2C/POLR2H/MNAT1	9
R-HSA-73776	RNA Polymerase II Promoter Escape	9/2093	47/10654	0.592576	0.833195	0.526098	GTF2A2/TAF7/POLR2K/POLR2L/TAF13/POLR2E/POLR2C/POLR2H/MNAT1	9
R-HSA-73779	RNA Polymerase II Transcription Pre-Initiation And Promoter Opening	9/2093	47/10654	0.592576	0.833195	0.526098	GTF2A2/TAF7/POLR2K/POLR2L/TAF13/POLR2E/POLR2C/POLR2H/MNAT1	9
R-HSA-75953	RNA Polymerase II Transcription Initiation	9/2093	47/10654	0.592576	0.833195	0.526098	GTF2A2/TAF7/POLR2K/POLR2L/TAF13/POLR2E/POLR2C/POLR2H/MNAT1	9
R-HSA-76042	RNA Polymerase II Transcription Initiation And Promoter Clearance	9/2093	47/10654	0.592576	0.833195	0.526098	GTF2A2/TAF7/POLR2K/POLR2L/TAF13/POLR2E/POLR2C/POLR2H/MNAT1	9
R-HSA-977606	Regulation of Complement cascade	9/2093	47/10654	0.592576	0.833195	0.526098	CD19/CD81/SERPING1/C3AR1/C5AR1/CFB/CFP/CD55/CD59	9
R-HSA-446219	Synthesis of substrates in N-glycan biosythesis	12/2093	63/10654	0.598104	0.839214	0.529899	ST6GALNAC4/ST6GAL1/NPL/NAGK/NANS/CTSA/NUS1/FUOM/NEU1/ST6GALNAC6/ST8SIA4/MVD	12
R-HSA-9033241	Peroxisomal protein import	12/2093	63/10654	0.598104	0.839214	0.529899	ZFAND6/RPS27A/UBA52/UBB/GSTK1/UBC/SCP2/HSD17B4/UBE2D1/PEX2/UBE2D3/USP9X	12
R-HSA-975576	N-glycan antennae elongation in the medial/trans-Golgi	5/2093	26/10654	0.599466	0.840251	0.530553	ST6GAL1/MGAT4A/B4GALT5/B4GALT1/MGAT2	5
R-HSA-379724	tRNA Aminoacylation	8/2093	42/10654	0.600575	0.84093	0.530982	WARS1/EEF1E1/IARS1/QARS1/TARS1/YARS1/PPA1/GARS1	8
R-HSA-2500257	Resolution of Sister Chromatid Cohesion	24/2093	126/10654	0.603218	0.84365	0.532699	TUBA1B/DYNLL1/TUBA1C/TUBB4B/PPP2R5C/KIF2A/RPS27/PAFAH1B1/TUBA1A/TUBB6/PPP2CB/PPP2CA/TAOK1/DYNC1LI1/DYNC1I2/MAD1L1/STAG2/TUBB2A/NUP98/MAPRE1/NDE1/CLIP1/RAD21/XPO1	24
R-HSA-1221632	Meiotic synapsis	15/2093	79/10654	0.60377	0.84365	0.532699	STAG3/SYNE2/H2BC12/H2AZ1/SYNE1/SUN2/LMNA/H2AJ/H4C3/TINF2/UBE2I/STAG2/LMNB1/H2AZ2/RAD21	15
R-HSA-166658	Complement cascade	11/2093	58/10654	0.604479	0.843764	0.532772	CD19/GZMM/CD81/SERPING1/C3AR1/FCN1/C5AR1/CFB/CFP/CD55/CD59	11
R-HSA-77289	Mitochondrial Fatty Acid Beta-Oxidation	7/2093	37/10654	0.609946	0.846141	0.534273	ACADM/ECHS1/DBI/NDUFAB1/ACOT9/ACADVL/ACOT13	7
R-HSA-112311	Neurotransmitter clearance	2/2093	10/10654	0.613492	0.846141	0.534273	ALDH2/COMT	2
R-HSA-1250342	PI3K events in ERBB4 signaling	2/2093	10/10654	0.613492	0.846141	0.534273	PIK3R1/EREG	2
R-HSA-159782	Removal of aminoterminal propeptides from gamma-carboxylated proteins	2/2093	10/10654	0.613492	0.846141	0.534273	FURIN/GAS6	2
R-HSA-2151209	Activation of PPARGC1A (PGC-1alpha) by phosphorylation	2/2093	10/10654	0.613492	0.846141	0.534273	PRKAG2/PRKAG1	2
R-HSA-2470946	Cohesin Loading onto Chromatin	2/2093	10/10654	0.613492	0.846141	0.534273	STAG2/RAD21	2
R-HSA-399997	Acetylcholine regulates insulin secretion	2/2093	10/10654	0.613492	0.846141	0.534273	GNA15/GNAQ	2
R-HSA-5685939	HDR through MMEJ (alt-NHEJ)	2/2093	10/10654	0.613492	0.846141	0.534273	PARP1/NBN	2
R-HSA-5687613	Diseases associated with surfactant metabolism	2/2093	10/10654	0.613492	0.846141	0.534273	CSF2RB/CSF2RA	2
R-HSA-8866904	Negative regulation of activity of TFAP2 (AP-2) family transcription factors	2/2093	10/10654	0.613492	0.846141	0.534273	SUMO1/UBE2I	2
R-HSA-9617629	Regulation of FOXO transcriptional activity by acetylation	2/2093	10/10654	0.613492	0.846141	0.534273	TXN/FOXO3	2
R-HSA-189200	Cellular hexose transport	4/2093	21/10654	0.614348	0.846141	0.534273	SLC50A1/SLC2A3/SLC2A6/SLC2A1	4
R-HSA-4641263	Regulation of FZD by ubiquitination	4/2093	21/10654	0.614348	0.846141	0.534273	RPS27A/UBA52/UBB/UBC	4
R-HSA-112399	IRS-mediated signalling	9/2093	48/10654	0.619694	0.852633	0.538372	GRB2/PIK3R1/FLT3LG/GAB2/PIK3CB/IRS2/NRAS/FLT3/KRAS	9
R-HSA-2173796	SMAD2/SMAD3:SMAD4 heterotrimer regulates transcription	6/2093	32/10654	0.621185	0.852942	0.538567	RPS27A/UBA52/UBB/MYC/UBC/JUNB	6
R-HSA-69190	DNA strand elongation	6/2093	32/10654	0.621185	0.852942	0.538567	MCM5/POLD2/RPA3/POLD4/RFC1/RPA2	6
R-HSA-1963642	PI3K events in ERBB2 signaling	3/2093	16/10654	0.635072	0.870256	0.549499	GRB2/PIK3R1/EREG	3
R-HSA-114508	Effects of PIP2 hydrolysis	5/2093	27/10654	0.635086	0.870256	0.549499	PRKCH/RASGRP1/DGKA/MGLL/ITPR2	5
R-HSA-74751	Insulin receptor signalling cascade	10/2093	54/10654	0.636771	0.871677	0.550397	GRB2/PIK3R1/FLT3LG/GAB2/PIK3CB/IRS2/NRAS/MAPK1/FLT3/KRAS	10
R-HSA-1474165	Reproduction	27/2093	144/10654	0.640416	0.875777	0.552986	HVCN1/IZUMO4/STAG3/SYNE2/BRCA2/RPA3/CDK4/H2BC12/H3-3A/H2AZ1/ATM/H3-3B/NBN/SYNE1/SUN2/CD9/LMNA/B4GALT1/H2AJ/H4C3/RPA2/TINF2/UBE2I/STAG2/LMNB1/H2AZ2/RAD21	27
R-HSA-113418	Formation of the Early Elongation Complex	6/2093	33/10654	0.652769	0.889413	0.561596	POLR2K/POLR2L/POLR2E/POLR2C/POLR2H/MNAT1	6
R-HSA-167158	Formation of the HIV-1 Early Elongation Complex	6/2093	33/10654	0.652769	0.889413	0.561596	POLR2K/POLR2L/POLR2E/POLR2C/POLR2H/MNAT1	6
R-HSA-5655332	Signaling by FGFR3 in disease	4/2093	22/10654	0.653029	0.889413	0.561596	GRB2/PIK3R1/NRAS/KRAS	4
R-HSA-8853338	Signaling by FGFR3 point mutants in cancer	4/2093	22/10654	0.653029	0.889413	0.561596	GRB2/PIK3R1/NRAS/KRAS	4
R-HSA-425393	Transport of inorganic cations/anions and amino acids/oligopeptides	20/2093	108/10654	0.654465	0.890469	0.562262	SRI/CALM2/CALM1/SLC1A3/SLC43A2/SLC7A7/SLC7A11/SLC8A1/SLC15A3/SLC7A5/SLC6A6/SLC36A4/SLC38A2/SLC20A1/SLC3A2/SLC38A1/SLC15A4/SLC6A12/SLC7A1/CALM3	20
R-HSA-6811438	Intra-Golgi traffic	8/2093	44/10654	0.656229	0.891968	0.563209	RAB30/ARF1/CYTH4/CUX1/STX5/CYTH2/CYTH1/NAPA	8
R-HSA-4551638	SUMOylation of chromatin organization proteins	13/2093	71/10654	0.658626	0.894323	0.564696	SATB1/SUMO1/NUP58/NUP62/NUP214/SUMO3/H4C3/TPR/UBE2I/NUP98/ZBED1/HDAC2/SUMO2	13
R-HSA-159854	Gamma-carboxylation, transport, and amino-terminal cleavage of proteins	2/2093	11/10654	0.667422	0.897131	0.566469	FURIN/GAS6	2
R-HSA-1660517	Synthesis of PIPs at the late endosome membrane	2/2093	11/10654	0.667422	0.897131	0.566469	PIKFYVE/VAC14	2
R-HSA-2022923	Dermatan sulfate biosynthesis	2/2093	11/10654	0.667422	0.897131	0.566469	VCAN/DSE	2
R-HSA-2206281	Mucopolysaccharidoses	2/2093	11/10654	0.667422	0.897131	0.566469	IDS/GNS	2
R-HSA-2468052	Establishment of Sister Chromatid Cohesion	2/2093	11/10654	0.667422	0.897131	0.566469	STAG2/RAD21	2
R-HSA-71288	Creatine metabolism	2/2093	11/10654	0.667422	0.897131	0.566469	CKB/SLC6A12	2
R-HSA-73614	Pyrimidine salvage	2/2093	11/10654	0.667422	0.897131	0.566469	TYMP/UPP1	2
R-HSA-163841	Gamma carboxylation, hypusine formation and arylsulfatase activation	7/2093	39/10654	0.66832	0.897131	0.566469	EIF5A/EEF2/FURIN/DPH3/SUMF2/DHPS/GAS6	7
R-HSA-8955332	Carboxyterminal post-translational modifications of tubulin	7/2093	39/10654	0.66832	0.897131	0.566469	TUBA1B/TUBA1C/TUBB4B/TUBA1A/TUBB6/TTL/TUBB2A	7
R-HSA-977444	GABA B receptor activation	7/2093	39/10654	0.66832	0.897131	0.566469	GNG7/GNG5/GNG2/GNAI2/GNB1/KCNJ2/GNB2	7
R-HSA-991365	Activation of GABAB receptors	7/2093	39/10654	0.66832	0.897131	0.566469	GNG7/GNG5/GNG2/GNAI2/GNB1/KCNJ2/GNB2	7
R-HSA-350054	Notch-HLH transcription pathway	5/2093	28/10654	0.668686	0.897131	0.566469	RBPJ/NOTCH2/NCOR2/MAML2/HDAC2	5
R-HSA-1912422	Pre-NOTCH Expression and Processing	20/2093	109/10654	0.67154	0.900064	0.568321	H2BC12/H3-3A/H2AZ1/H3-3B/FURIN/TMED2/RBPJ/B4GALT1/NOTCH2/RUNX1/ATP2A2/JUN/SEL1L/H2AJ/TNRC6B/MAML2/H4C3/MFNG/POGLUT1/H2AZ2	20
R-HSA-416993	Trafficking of GluR2-containing AMPA receptors	3/2093	17/10654	0.677673	0.904684	0.571238	PRKCB/AP2S1/AP2M1	3
R-HSA-450604	KSRP (KHSRP) binds and destabilizes mRNA	3/2093	17/10654	0.677673	0.904684	0.571238	YWHAZ/DCP2/EXOSC8	3
R-HSA-6788467	IL-6-type cytokine receptor ligand interactions	3/2093	17/10654	0.677673	0.904684	0.571238	JAK1/JAK2/IL6ST	3
R-HSA-9018677	Biosynthesis of DHA-derived SPMs	3/2093	17/10654	0.677673	0.904684	0.571238	LTA4H/GPX4/PTGS2	3
R-HSA-159227	Transport of the SLBP independent Mature mRNA	6/2093	34/10654	0.682679	0.909563	0.574319	EIF4E/NUP58/NUP62/NUP214/TPR/NUP98	6
R-HSA-1638074	Keratan sulfate/keratin metabolism	6/2093	34/10654	0.682679	0.909563	0.574319	GNS/B4GALT5/HEXB/B4GALT1/HEXA/B3GNT2	6
R-HSA-166663	Initial triggering of complement	4/2093	23/10654	0.689017	0.916196	0.578507	GZMM/FCN1/CFB/CFP	4
R-HSA-9617324	Negative regulation of NMDA receptor-mediated neuronal transmission	4/2093	23/10654	0.689017	0.916196	0.578507	CALM2/CAMK4/CALM1/CALM3	4
R-HSA-446193	Biosynthesis of the N-glycan precursor (dolichol lipid-linked oligosaccharide, LLO) and transfer to a nascent protein	14/2093	78/10654	0.691418	0.918481	0.57995	ST6GALNAC4/ST6GAL1/ALG13/NPL/NAGK/NANS/CTSA/NUS1/ALG2/FUOM/NEU1/ST6GALNAC6/ST8SIA4/MVD	14
R-HSA-3214858	RMTs methylate histone arginines	14/2093	79/10654	0.710296	0.942442	0.595079	SMARCB1/PRMT1/CDK4/RPS2/H2AZ1/SMARCE1/JAK2/H2AJ/H4C3/SMARCC2/ARID1B/H2AZ2/PBRM1/SMARCC1	14
R-HSA-159230	Transport of the SLBP Dependant Mature mRNA	6/2093	35/10654	0.710854	0.942442	0.595079	EIF4E/NUP58/NUP62/NUP214/TPR/NUP98	6
R-HSA-417957	P2Y receptors	2/2093	12/10654	0.715089	0.943363	0.595661	LPAR6/P2RY10	2
R-HSA-5578768	Physiological factors	2/2093	12/10654	0.715089	0.943363	0.595661	HIPK2/HIPK1	2
R-HSA-6803207	TP53 Regulates Transcription of Caspase Activators and Caspases	2/2093	12/10654	0.715089	0.943363	0.595661	ATM/CASP1	2
R-HSA-6803211	TP53 Regulates Transcription of Death Receptors and Ligands	2/2093	12/10654	0.715089	0.943363	0.595661	TMEM219/FAS	2
R-HSA-83936	Transport of nucleosides and free purine and pyrimidine bases across the plasma membrane	2/2093	12/10654	0.715089	0.943363	0.595661	SLC25A6/SLC25A5	2
R-HSA-5635838	Activation of SMO	3/2093	18/10654	0.716468	0.943363	0.595661	ARRB2/ARRB1/CSNK1A1	3
R-HSA-5654704	SHC-mediated cascade:FGFR3	3/2093	18/10654	0.716468	0.943363	0.595661	GRB2/NRAS/KRAS	3
R-HSA-5633007	Regulation of TP53 Activity	29/2093	160/10654	0.717248	0.943363	0.595661	RPA3/HIPK2/PPP2R5C/TAF7/ATM/CCNG1/RPS27A/UBA52/UBB/NBN/UBC/SGK1/PIP4K2A/MEAF6/ZNF385A/PPP2CB/PLK3/HIPK1/TAF13/PPP2CA/PRKAG2/PRDM1/RPA2/RAD9A/RBBP4/CHD4/PRKAG1/HDAC2/PML	29
R-HSA-2428928	IRS-related events triggered by IGF1R	9/2093	52/10654	0.717852	0.943363	0.595661	GRB2/PIK3R1/FLT3LG/GAB2/PIK3CB/IRS2/NRAS/FLT3/KRAS	9
R-HSA-69618	Mitotic Spindle Checkpoint	20/2093	112/10654	0.719927	0.943774	0.59592	DYNLL1/PPP2R5C/ANAPC11/KIF2A/RPS27/PAFAH1B1/UBE2D1/PPP2CB/PPP2CA/TAOK1/UBE2E1/DYNC1LI1/DYNC1I2/ANAPC16/MAD1L1/NUP98/MAPRE1/NDE1/CLIP1/XPO1	20
R-HSA-216083	Integrin cell surface interactions	15/2093	85/10654	0.72055	0.943774	0.59592	CD44/ICAM1/ITGB2/BSG/ITGAE/ITGAL/ITGA4/SPP1/ITGB8/ITGAX/ITGAV/ITGA5/ICAM3/CD47/ICAM2	15
R-HSA-425366	Transport of bile salts and organic acids, metal ions and amine compounds	15/2093	85/10654	0.72055	0.943774	0.59592	SLC16A3/BSG/SLC39A8/SLC11A1/SLC41A2/SLC11A2/SLC30A1/SLC6A6/RUNX1/SLC31A1/SLC44A1/SLC39A1/SLC30A7/SLC39A7/SLC6A12	15
R-HSA-3560782	Diseases associated with glycosaminoglycan metabolism	7/2093	41/10654	0.720968	0.943774	0.59592	VCAN/SDC2/SDC4/HEXB/B4GALT1/CHSY1/HEXA	7
R-HSA-8940973	RUNX2 regulates osteoblast differentiation	4/2093	24/10654	0.722272	0.944563	0.596419	SRC/RB1/MAPK1/RUNX2	4
R-HSA-427413	NoRC negatively regulates rRNA expression	19/2093	107/10654	0.726013	0.948535	0.598926	H2BC12/H3-3A/H2AZ1/H3-3B/POLR2K/POLR2L/MBD2/H2AJ/SMARCA5/POLR2E/TAF1D/H4C3/TWISTNB/POLR1D/POLR2H/MNAT1/ARID4B/H2AZ2/HDAC2	19
R-HSA-2559586	DNA Damage/Telomere Stress Induced Senescence	14/2093	80/10654	0.728449	0.950796	0.600354	HMGA1/H2BC12/H2AZ1/ATM/CDKN1A/NBN/H1-0/RB1/H2AJ/H4C3/TINF2/LMNB1/H2AZ2/H1-2	14
R-HSA-5683826	Surfactant metabolism	5/2093	30/10654	0.729539	0.951219	0.600621	CTSH/CSF2RB/CSF2RA/CKAP4/ADA2	5
R-HSA-201722	Formation of the beta-catenin:TCF transactivating complex	16/2093	91/10654	0.730186	0.951219	0.600621	TCF7/LEF1/H2BC12/H3-3A/H2AZ1/H3-3B/RUNX3/MYC/TCF7L2/CTNNB1/H2AJ/H4C3/TLE4/TLE3/H2AZ2/CDC73	16
R-HSA-2514859	Inactivation, recovery and regulation of the phototransduction cascade	6/2093	36/10654	0.737265	0.959514	0.605859	CALM2/CALM1/GNB1/NMT2/NMT1/CALM3	6
R-HSA-2428924	IGF1R signaling cascade	9/2093	53/10654	0.739583	0.9616	0.607176	GRB2/PIK3R1/FLT3LG/GAB2/PIK3CB/IRS2/NRAS/FLT3/KRAS	9
R-HSA-6804756	Regulation of TP53 Activity through Phosphorylation	16/2093	92/10654	0.746525	0.965443	0.609603	RPA3/HIPK2/TAF7/ATM/RPS27A/UBA52/UBB/NBN/UBC/PLK3/HIPK1/TAF13/PRKAG2/RPA2/RAD9A/PRKAG1	16
R-HSA-73884	Base Excision Repair	16/2093	92/10654	0.746525	0.965443	0.609603	PARP1/POLD2/RPA3/MPG/POLD4/MBD4/H2BC12/APEX1/H2AZ1/H2AJ/H4C3/RFC1/RPA2/TINF2/H2AZ2/TDG	16
R-HSA-983189	Kinesins	10/2093	59/10654	0.748158	0.965443	0.609603	TUBA1B/TUBA1C/TUBB4B/KIF2A/TUBA1A/TUBB6/KIF1B/KIF5B/TUBB2A/KIF3B	10
R-HSA-1362277	Transcription of E2F targets under negative control by DREAM complex	3/2093	19/10654	0.751536	0.965443	0.609603	MYC/RBL2/RBBP4	3
R-HSA-888590	GABA synthesis, release, reuptake and degradation	3/2093	19/10654	0.751536	0.965443	0.609603	VAMP2/HSPA8/SLC6A12	3
R-HSA-5654708	Downstream signaling of activated FGFR3	4/2093	25/10654	0.752808	0.965443	0.609603	GRB2/PIK3R1/NRAS/KRAS	4
R-HSA-5674400	Constitutive Signaling by AKT1 E17K in Cancer	4/2093	25/10654	0.752808	0.965443	0.609603	CDKN1A/FOXO3/AKT1S1/RPS6KB2	4
R-HSA-69273	Cyclin A/B1/B2 associated events during G2/M transition	4/2093	25/10654	0.752808	0.965443	0.609603	PPP2CB/PPP2CA/MNAT1/XPO1	4
R-HSA-9620244	Long-term potentiation	4/2093	25/10654	0.752808	0.965443	0.609603	CALM2/CALM1/SRC/CALM3	4
R-HSA-5693565	Recruitment and ATM-mediated phosphorylation of repair and signaling proteins at DNA double strand breaks	13/2093	76/10654	0.754596	0.965443	0.609603	UBE2N/H2BC12/ATM/RPS27A/UBA52/UBB/NBN/UBC/SUMO1/SMARCA5/H4C3/UBE2I/MAPK8	13
R-HSA-5693607	Processing of DNA double-strand break ends	17/2093	98/10654	0.754824	0.965443	0.609603	UBE2N/RPA3/H2BC12/ATM/RPS27A/UBA52/UBB/NBN/UBC/PPP4C/SUMO1/PPP4R2/H4C3/RPA2/RAD9A/UBE2I/SUMO2	17
R-HSA-168271	Transport of Ribonucleoproteins into the Host Nucleus	5/2093	31/10654	0.756754	0.965443	0.609603	NUP58/NUP62/NUP214/TPR/NUP98	5
R-HSA-170822	Regulation of Glucokinase by Glucokinase Regulatory Protein	5/2093	31/10654	0.756754	0.965443	0.609603	NUP58/NUP62/NUP214/TPR/NUP98	5
R-HSA-4641262	Disassembly of the destruction complex and recruitment of AXIN to the membrane	5/2093	31/10654	0.756754	0.965443	0.609603	PPP2R5C/PPP2CB/CTNNB1/PPP2CA/CSNK1A1	5
R-HSA-5619107	Defective TPR may confer susceptibility towards thyroid papillary carcinoma (TPC)	5/2093	31/10654	0.756754	0.965443	0.609603	NUP58/NUP62/NUP214/TPR/NUP98	5
R-HSA-1362409	Mitochondrial iron-sulfur cluster biogenesis	2/2093	13/10654	0.756873	0.965443	0.609603	LYRM4/SLC25A37	2
R-HSA-1483213	Synthesis of PE	2/2093	13/10654	0.756873	0.965443	0.609603	LPIN2/LPIN1	2
R-HSA-1502540	Signaling by Activin	2/2093	13/10654	0.756873	0.965443	0.609603	INHBA/DRAP1	2
R-HSA-2564830	Cytosolic iron-sulfur cluster assembly	2/2093	13/10654	0.756873	0.965443	0.609603	NUBP1/CIAO2B	2
R-HSA-68884	Mitotic Telophase/Cytokinesis	2/2093	13/10654	0.756873	0.965443	0.609603	STAG2/RAD21	2
R-HSA-2404192	Signaling by Type 1 Insulin-like Growth Factor 1 Receptor (IGF1R)	9/2093	54/10654	0.760145	0.968699	0.611659	GRB2/PIK3R1/FLT3LG/GAB2/PIK3CB/IRS2/NRAS/FLT3/KRAS	9
R-HSA-2514856	The phototransduction cascade	6/2093	37/10654	0.761908	0.969112	0.61192	CALM2/CALM1/GNB1/NMT2/NMT1/CALM3	6
R-HSA-5689901	Metalloprotease DUBs	6/2093	37/10654	0.761908	0.969112	0.61192	RPS27A/UBA52/UBB/UBC/NLRP3/PSMD14	6
R-HSA-194068	Bile acid and bile salt metabolism	7/2093	43/10654	0.767616	0.975451	0.615922	SCP2/CYP27A1/RXRA/HSD17B4/AKR1C3/NCOA1/OSBPL9	7
R-HSA-5250941	Negative epigenetic regulation of rRNA expression	19/2093	110/10654	0.77018	0.976867	0.616816	H2BC12/H3-3A/H2AZ1/H3-3B/POLR2K/POLR2L/MBD2/H2AJ/SMARCA5/POLR2E/TAF1D/H4C3/TWISTNB/POLR1D/POLR2H/MNAT1/ARID4B/H2AZ2/HDAC2	19
R-HSA-73854	RNA Polymerase I Promoter Clearance	19/2093	110/10654	0.77018	0.976867	0.616816	H2BC12/H3-3A/H2AZ1/H3-3B/POLR2K/POLR2L/MBD2/H2AJ/POLR2E/TAF1D/H4C3/TWISTNB/POLR1D/POLR2H/MNAT1/RBBP4/CHD4/H2AZ2/HDAC2	19
R-HSA-5693606	DNA Double Strand Break Response	13/2093	77/10654	0.771407	0.977502	0.617217	UBE2N/H2BC12/ATM/RPS27A/UBA52/UBB/NBN/UBC/SUMO1/SMARCA5/H4C3/UBE2I/MAPK8	13
R-HSA-6811440	Retrograde transport at the Trans-Golgi-Network	8/2093	49/10654	0.77355	0.979297	0.618351	RAB9A/GOLGA4/IGF2R/VAMP3/M6PR/PLIN3/GCC2/NAPA	8
R-HSA-1187000	Fertilization	4/2093	26/10654	0.780688	0.983897	0.621255	HVCN1/IZUMO4/CD9/B4GALT1	4
R-HSA-1181150	Signaling by NODAL	3/2093	20/10654	0.783027	0.983897	0.621255	FURIN/FOXO3/DRAP1	3
R-HSA-3560783	Defective B4GALT7 causes EDS, progeroid type	3/2093	20/10654	0.783027	0.983897	0.621255	VCAN/SDC2/SDC4	3
R-HSA-3560801	Defective B3GAT3 causes JDSSDHD	3/2093	20/10654	0.783027	0.983897	0.621255	VCAN/SDC2/SDC4	3
R-HSA-4420332	Defective B3GALT6 causes EDSP2 and SEMDJL1	3/2093	20/10654	0.783027	0.983897	0.621255	VCAN/SDC2/SDC4	3
R-HSA-5654706	FRS-mediated FGFR3 signaling	3/2093	20/10654	0.783027	0.983897	0.621255	GRB2/NRAS/KRAS	3
R-HSA-5654719	SHC-mediated cascade:FGFR4	3/2093	20/10654	0.783027	0.983897	0.621255	GRB2/NRAS/KRAS	3
R-HSA-9013695	NOTCH4 Intracellular Domain Regulates Transcription	3/2093	20/10654	0.783027	0.983897	0.621255	RBPJ/NOTCH2/MAML2	3
R-HSA-109704	PI3K Cascade	7/2093	44/10654	0.788689	0.988436	0.624121	GRB2/PIK3R1/FLT3LG/GAB2/PIK3CB/IRS2/FLT3	7
R-HSA-5578749	Transcriptional regulation by small RNAs	18/2093	106/10654	0.79059	0.988436	0.624121	RAN/H2BC12/H3-3A/H2AZ1/H3-3B/POLR2K/POLR2L/NUP58/NUP62/H2AJ/NUP214/POLR2E/H4C3/TPR/POLR2C/POLR2H/NUP98/H2AZ2	18
R-HSA-1614558	Degradation of cysteine and homocysteine	2/2093	14/10654	0.793244	0.988436	0.624121	TSTD1/SQOR	2
R-HSA-193775	Synthesis of bile acids and bile salts via 24-hydroxycholesterol	2/2093	14/10654	0.793244	0.988436	0.624121	CYP27A1/AKR1C3	2
R-HSA-198323	AKT phosphorylates targets in the cytosol	2/2093	14/10654	0.793244	0.988436	0.624121	CDKN1A/AKT1S1	2
R-HSA-200425	Import of palmitoyl-CoA into the mitochondrial matrix	2/2093	14/10654	0.793244	0.988436	0.624121	RXRA/PRKAG2	2
R-HSA-3656237	Defective EXT2 causes exostoses 2	2/2093	14/10654	0.793244	0.988436	0.624121	SDC2/SDC4	2
R-HSA-3656253	Defective EXT1 causes exostoses 1, TRPS2 and CHDS	2/2093	14/10654	0.793244	0.988436	0.624121	SDC2/SDC4	2
R-HSA-8964539	Glutamate and glutamine metabolism	2/2093	14/10654	0.793244	0.988436	0.624121	GLUL/GLS	2
R-HSA-73864	RNA Polymerase I Transcription	19/2093	112/10654	0.796835	0.991993	0.626367	H2BC12/H3-3A/H2AZ1/H3-3B/POLR2K/POLR2L/MBD2/H2AJ/POLR2E/TAF1D/H4C3/TWISTNB/POLR1D/POLR2H/MNAT1/RBBP4/CHD4/H2AZ2/HDAC2	19
R-HSA-1592389	Activation of Matrix Metalloproteinases	5/2093	33/10654	0.804911	0.996966	0.629507	TIMP1/FURIN/MMP14/MMP9/TIMP2	5
R-HSA-1839126	FGFR2 mutant receptor activation	5/2093	33/10654	0.804911	0.996966	0.629507	POLR2K/POLR2L/POLR2E/POLR2C/POLR2H	5
R-HSA-141424	Amplification of signal from the kinetochores	16/2093	96/10654	0.805282	0.996966	0.629507	DYNLL1/PPP2R5C/KIF2A/RPS27/PAFAH1B1/PPP2CB/PPP2CA/TAOK1/DYNC1LI1/DYNC1I2/MAD1L1/NUP98/MAPRE1/NDE1/CLIP1/XPO1	16
R-HSA-141444	Amplification of signal from unattached kinetochores via a MAD2 inhibitory signal	16/2093	96/10654	0.805282	0.996966	0.629507	DYNLL1/PPP2R5C/KIF2A/RPS27/PAFAH1B1/PPP2CB/PPP2CA/TAOK1/DYNC1LI1/DYNC1I2/MAD1L1/NUP98/MAPRE1/NDE1/CLIP1/XPO1	16
R-HSA-5693616	Presynaptic phase of homologous DNA pairing and strand exchange	6/2093	39/10654	0.805978	0.996966	0.629507	BRCA2/RPA3/ATM/NBN/RPA2/RAD9A	6
R-HSA-3000170	Syndecan interactions	4/2093	27/10654	0.80601	0.996966	0.629507	SDC2/SDC4/ITGAV/ACTN1	4
R-HSA-5654716	Downstream signaling of activated FGFR4	4/2093	27/10654	0.80601	0.996966	0.629507	GRB2/PIK3R1/NRAS/KRAS	4
R-HSA-416476	G alpha (q) signalling events	38/2093	217/10654	0.811136	1	0.631423	GNG7/BTK/ANXA1/RGS19/GRB2/RGS16/GNG5/LPAR6/PRKCH/PIK3R1/RASGRP1/RGS1/DGKA/XCL2/GNG2/CYSLTR1/GNB1/RGS2/GPR65/PTAFR/FFAR2/EDN1/FPR2/GNB4/GNA15/MGLL/GNAQ/APP/GNB2/GPR132/NRAS/ITPR2/RPS6KA1/RPS6KA3/P2RY10/XCL1/MAPK1/KRAS	38
R-HSA-2142691	Synthesis of Leukotrienes (LT) and Eoxins (EX)	3/2093	21/10654	0.811141	1	0.631423	LTA4H/ALOX5AP/MAPKAPK2	3
R-HSA-5654688	SHC-mediated cascade:FGFR1	3/2093	21/10654	0.811141	1	0.631423	GRB2/NRAS/KRAS	3
R-HSA-446728	Cell junction organization	15/2093	91/10654	0.813239	1	0.631423	ACTB/ACTG1/VASP/ILK/LIMS1/NECTIN2/CTNNA1/CTNND1/PARVB/FLNA/PLEC/CTNNB1/ACTN1/RSU1/PVR	15
R-HSA-73772	RNA Polymerase I Promoter Escape	15/2093	91/10654	0.813239	1	0.631423	H2BC12/H3-3A/H2AZ1/H3-3B/POLR2K/POLR2L/H2AJ/POLR2E/TAF1D/H4C3/TWISTNB/POLR1D/POLR2H/MNAT1/H2AZ2	15
R-HSA-6784531	tRNA processing in the nucleus	9/2093	57/10654	0.814857	1	0.631423	RTCB/RAN/NUP58/NUP62/NUP214/RTRAF/TPR/ZBTB8OS/NUP98	9
R-HSA-2162123	Synthesis of Prostaglandins (PG) and Thromboxanes (TX)	2/2093	15/10654	0.824715	1	0.631423	PTGS2/AKR1C3	2
R-HSA-6785631	ERBB2 Regulates Cell Motility	2/2093	15/10654	0.824715	1	0.631423	RHOA/EREG	2
R-HSA-6783310	Fanconi Anemia Pathway	6/2093	40/10654	0.825495	1	0.631423	RPA3/RPS27A/UBA52/UBB/UBC/RPA2	6
R-HSA-383280	Nuclear Receptor transcription pathway	8/2093	52/10654	0.828349	1	0.631423	RORA/RXRA/NR1H3/NR4A3/NR4A2/NCOR2/NRBF2/PPARA	8
R-HSA-1482788	Acyl chain remodelling of PC	4/2093	28/10654	0.828898	1	0.631423	LPCAT2/PNPLA8/LPCAT1/PLAAT3	4
R-HSA-1483191	Synthesis of PC	4/2093	28/10654	0.828898	1	0.631423	SLC44A1/LPCAT1/LPIN2/LPIN1	4
R-HSA-1442490	Collagen degradation	10/2093	64/10654	0.833683	1	0.631423	CTSD/ADAM17/CTSB/FURIN/CTSL/MMP14/MMP9/MMP19/ADAM9/ADAM10	10
R-HSA-113510	E2F mediated regulation of DNA replication	3/2093	22/10654	0.836106	1	0.631423	PPP2CB/RB1/PPP2CA	3
R-HSA-2024096	HS-GAG degradation	3/2093	22/10654	0.836106	1	0.631423	IDS/SDC2/SDC4	3
R-HSA-5654712	FRS-mediated FGFR4 signaling	3/2093	22/10654	0.836106	1	0.631423	GRB2/NRAS/KRAS	3
R-HSA-8978868	Fatty acid metabolism	30/2093	177/10654	0.84291	1	0.631423	ACADM/HSD17B12/ECHS1/DBI/NDUFAB1/LTA4H/ALOX5AP/TECR/GPX1/SCP2/GPX4/PTGS2/ACSL1/CYP1B1/ACSL4/RXRA/HSD17B4/ACSL5/PPT1/MAPKAPK2/ACOT9/PRKAG2/AKR1C3/ALOX15B/SCD/FADS2/FADS1/ACADVL/ELOVL1/ACOT13	30
R-HSA-159231	Transport of Mature mRNA Derived from an Intronless Transcript	6/2093	41/10654	0.843414	1	0.631423	EIF4E/NUP58/NUP62/NUP214/TPR/NUP98	6
R-HSA-8875878	MET promotes cell motility	6/2093	41/10654	0.843414	1	0.631423	GRB2/RAC1/RAP1B/RAPGEF1/SRC/TNS3	6
R-HSA-9609736	Assembly and cell surface presentation of NMDA receptors	6/2093	41/10654	0.843414	1	0.631423	TUBA1B/TUBA1C/TUBB4B/TUBA1A/TUBB6/TUBB2A	6
R-HSA-1660499	Synthesis of PIPs at the plasma membrane	8/2093	53/10654	0.84413	1	0.631423	PIK3R1/ARF1/PIP4K2A/PIK3CB/PIK3R5/SBF2/MTMR6/RAB5A	8
R-HSA-196071	Metabolism of steroid hormones	5/2093	35/10654	0.845174	1	0.631423	HSD17B12/TSPO/STARD3NL/STARD4/HSD17B11	5
R-HSA-3301854	Nuclear Pore Complex (NPC) Disassembly	5/2093	35/10654	0.845174	1	0.631423	NUP58/NUP62/NUP214/TPR/NUP98	5
R-HSA-8953750	Transcriptional Regulation by E2F6	5/2093	35/10654	0.845174	1	0.631423	RYBP/UXT/RBBP4/EPC1/EZH2	5
R-HSA-2142753	Arachidonic acid metabolism	9/2093	59/10654	0.845705	1	0.631423	LTA4H/ALOX5AP/GPX1/GPX4/PTGS2/CYP1B1/MAPKAPK2/AKR1C3/ALOX15B	9
R-HSA-68877	Mitotic Prometaphase	34/2093	200/10654	0.851375	1	0.631423	TUBA1B/DYNLL1/TUBA1C/TUBB4B/YWHAE/TUBB/PPP2R5C/OFD1/KIF2A/RPS27/PAFAH1B1/TUBA1A/TUBB6/PPP2CB/YWHAG/PPP2CA/TAOK1/DYNC1LI1/SDCCAG8/DYNC1I2/AKAP9/MAD1L1/CSNK1D/STAG2/TUBB2A/CEP135/NUP98/MAPRE1/SSNA1/NDE1/CLIP1/RAD21/XPO1/HSP90AA1	34
R-HSA-1362300	Transcription of E2F targets under negative control by p107 (RBL1) and p130 (RBL2) in complex with HDAC1	2/2093	16/10654	0.851806	1	0.631423	RBL2/RBBP4	2
R-HSA-159418	Recycling of bile acids and salts	2/2093	16/10654	0.851806	1	0.631423	RXRA/NCOA1	2
R-HSA-1660516	Synthesis of PIPs at the early endosome membrane	2/2093	16/10654	0.851806	1	0.631423	PIKFYVE/VAC14	2
R-HSA-210744	Regulation of gene expression in late stage (branching morphogenesis) pancreatic bud precursor cells	2/2093	16/10654	0.851806	1	0.631423	RBPJ/MAML2	2
R-HSA-399956	CRMPs in Sema3A signaling	2/2093	16/10654	0.851806	1	0.631423	FYN/DPYSL2	2
R-HSA-418038	Nucleotide-like (purinergic) receptors	2/2093	16/10654	0.851806	1	0.631423	LPAR6/P2RY10	2
R-HSA-196849	Metabolism of water-soluble vitamins and cofactors	20/2093	123/10654	0.857379	1	0.631423	SLC25A19/SHMT2/PARP14/ACP5/NMRK1/CD38/NAMPT/SLC2A3/MTHFD2/GSTO1/PARP8/PTGS2/CYB5R3/NADK/FPGS/MTHFS/SLC2A1/PANK3/MMAB/CYB5A	20
R-HSA-438066	Unblocking of NMDA receptors, glutamate binding and activation	3/2093	23/10654	0.858169	1	0.631423	CALM2/CALM1/CALM3	3
R-HSA-5654693	FRS-mediated FGFR1 signaling	3/2093	23/10654	0.858169	1	0.631423	GRB2/NRAS/KRAS	3
R-HSA-5654699	SHC-mediated cascade:FGFR2	3/2093	23/10654	0.858169	1	0.631423	GRB2/NRAS/KRAS	3
R-HSA-5617833	Cilium Assembly	34/2093	201/10654	0.859111	1	0.631423	TUBA1B/IFT57/CCT5/DYNLL1/TUBA1C/TUBB4B/YWHAE/TUBB/CCT3/OFD1/PAFAH1B1/RAB8A/SEPTIN2/TUBA1A/TUBB6/ASAP1/YWHAG/ARF4/EXOC5/SDCCAG8/DYNLRB1/DYNC1I2/AKAP9/HSPB11/CSNK1D/TUBB2A/TNPO1/CEP135/MAPRE1/KIF3B/SSNA1/NDE1/RAB11A/HSP90AA1	34
R-HSA-159234	Transport of Mature mRNAs Derived from Intronless Transcripts	6/2093	42/10654	0.859808	1	0.631423	EIF4E/NUP58/NUP62/NUP214/TPR/NUP98	6
R-HSA-5693579	Homologous DNA Pairing and Strand Exchange	6/2093	42/10654	0.859808	1	0.631423	BRCA2/RPA3/ATM/NBN/RPA2/RAD9A	6
R-HSA-1483206	Glycerophospholipid biosynthesis	21/2093	129/10654	0.860903	1	0.631423	PLAAT4/CPNE3/LPCAT2/PLD3/PLD1/GPD2/MGLL/MBOAT7/GPAT4/PNPLA8/SLC44A1/LPCAT1/OSBPL8/GPCPD1/CDS2/LPIN2/LPIN1/CPNE1/PLAAT3/AGPAT3/LPGAT1	21
R-HSA-1630316	Glycosaminoglycan metabolism	20/2093	124/10654	0.866768	1	0.631423	IDS/CD44/CHST12/VCAN/GNS/DSE/SDC2/SDC4/CEMIP/HS3ST3B1/B4GALT5/HEXB/B4GALT1/CSGALNACT2/CHST11/PAPSS1/CHSY1/CHP1/HEXA/B3GNT2	20
R-HSA-1483255	PI Metabolism	13/2093	84/10654	0.866785	1	0.631423	PIKFYVE/PIK3R1/ARF1/TNFAIP8/PIP4K2A/PIK3CB/VAC14/PIK3R5/SBF2/ARF3/MTMR6/PNPLA6/RAB5A	13
R-HSA-5654696	Downstream signaling of activated FGFR2	4/2093	30/10654	0.867947	1	0.631423	GRB2/PIK3R1/NRAS/KRAS	4
R-HSA-1482922	Acyl chain remodelling of PI	2/2093	17/10654	0.875024	1	0.631423	MBOAT7/PLAAT3	2
R-HSA-4655427	SUMOylation of DNA methylation proteins	2/2093	17/10654	0.875024	1	0.631423	SUMO1/UBE2I	2
R-HSA-156584	Cytosolic sulfonation of small molecules	3/2093	24/10654	0.877583	1	0.631423	IMPAD1/PAPSS1/ABHD14B	3
R-HSA-452723	Transcriptional regulation of pluripotent stem cells	3/2093	24/10654	0.877583	1	0.631423	FOXP1/STAT3/KLF4	3
R-HSA-5685938	HDR through Single Strand Annealing (SSA)	5/2093	37/10654	0.878308	1	0.631423	RPA3/ATM/NBN/RPA2/RAD9A	5
R-HSA-5654687	Downstream signaling of activated FGFR1	4/2093	31/10654	0.88442	1	0.631423	GRB2/PIK3R1/NRAS/KRAS	4
R-HSA-977443	GABA receptor activation	8/2093	56/10654	0.884625	1	0.631423	GNG7/GNG5/GNG2/GNAI2/GNB1/KCNJ2/NPTN/GNB2	8
R-HSA-5693567	HDR through Homologous Recombination (HRR) or Single Strand Annealing (SSA)	21/2093	132/10654	0.88661	1	0.631423	UBE2N/POLD2/BRCA2/RPA3/POLD4/H2BC12/ATM/RPS27A/UBA52/UBB/NBN/UBC/PPP4C/SUMO1/PPP4R2/H4C3/RFC1/RPA2/RAD9A/UBE2I/SUMO2	21
R-HSA-912446	Meiotic recombination	13/2093	86/10654	0.887327	1	0.631423	BRCA2/RPA3/CDK4/H2BC12/H3-3A/H2AZ1/ATM/H3-3B/NBN/H2AJ/H4C3/RPA2/H2AZ2	13
R-HSA-1483115	Hydrolysis of LPC	1/2093	10/10654	0.887884	1	0.631423	GPCPD1	1
R-HSA-159740	Gamma-carboxylation of protein precursors	1/2093	10/10654	0.887884	1	0.631423	GAS6	1
R-HSA-168799	Neurotoxicity of clostridium toxins	1/2093	10/10654	0.887884	1	0.631423	VAMP2	1
R-HSA-1855167	Synthesis of pyrophosphates in the cytosol	1/2093	10/10654	0.887884	1	0.631423	NUDT3	1
R-HSA-190377	FGFR2b ligand binding and activation	1/2093	10/10654	0.887884	1	0.631423	FGFBP2	1
R-HSA-2161522	Abacavir transport and metabolism	1/2093	10/10654	0.887884	1	0.631423	GUK1	1
R-HSA-418890	Role of second messengers in netrin-1 signaling	1/2093	10/10654	0.887884	1	0.631423	PITPNA	1
R-HSA-419771	Opsins	1/2093	10/10654	0.887884	1	0.631423	OPN3	1
R-HSA-428542	Regulation of commissural axon pathfinding by SLIT and ROBO	1/2093	10/10654	0.887884	1	0.631423	SRC	1
R-HSA-549127	Organic cation transport	1/2093	10/10654	0.887884	1	0.631423	RUNX1	1
R-HSA-8964058	HDL remodeling	1/2093	10/10654	0.887884	1	0.631423	ABCG1	1
R-HSA-975578	Reactions specific to the complex N-glycan synthesis pathway	1/2093	10/10654	0.887884	1	0.631423	MGAT2	1
R-HSA-5693538	Homology Directed Repair	22/2093	138/10654	0.889086	1	0.631423	PARP1/UBE2N/POLD2/BRCA2/RPA3/POLD4/H2BC12/ATM/RPS27A/UBA52/UBB/NBN/UBC/PPP4C/SUMO1/PPP4R2/H4C3/RFC1/RPA2/RAD9A/UBE2I/SUMO2	22
R-HSA-196854	Metabolism of vitamins and cofactors	31/2093	189/10654	0.891598	1	0.631423	SLC25A19/SHMT2/PARP14/ACP5/CALM2/CALM1/NMRK1/CD38/NAMPT/SLC2A3/MTHFD2/VKORC1/GSTO1/PARP8/PTGS2/GCH1/SDC2/SDC4/LRP1/CYB5R3/NADK/FPGS/MTHFS/GCHFR/AKR1C3/SLC2A1/PANK3/MMAB/CYB5A/CALM3/HSP90AA1	31
R-HSA-112314	Neurotransmitter receptors and postsynaptic signal transmission	34/2093	206/10654	0.893339	1	0.631423	GNG7/TUBA1B/PRKCB/TUBA1C/TUBB4B/GNG5/CALM2/CAMK4/CALM1/GNG2/RAC1/GNAI2/GNB1/PRKAR1A/AP2S1/TUBA1A/KCNJ2/TUBB6/SRC/GNB4/NPTN/GNB2/NRAS/RPS6KA1/PRKAG2/PRKAR2A/RPS6KA3/PRKACB/MAPK1/PRKAG1/TUBB2A/KRAS/AP2M1/CALM3	34
R-HSA-5654700	FRS-mediated FGFR2 signaling	3/2093	25/10654	0.894598	1	0.631423	GRB2/NRAS/KRAS	3
R-HSA-5654710	PI-3K cascade:FGFR3	2/2093	18/10654	0.894844	1	0.631423	GRB2/PIK3R1	2
R-HSA-375165	NCAM signaling for neurite out-growth	9/2093	63/10654	0.895128	1	0.631423	GRB2/FYN/SRC/NRAS/NCAM1/MAPK1/PRNP/ST8SIA4/KRAS	9
R-HSA-73929	Base-Excision Repair, AP Site Formation	9/2093	63/10654	0.895128	1	0.631423	MPG/MBD4/H2BC12/H2AZ1/H2AJ/H4C3/TINF2/H2AZ2/TDG	9
R-HSA-375276	Peptide ligand-binding receptors	33/2093	201/10654	0.896824	1	0.631423	CXCR5/ANXA1/CXCL10/CCL22/CCR7/XCL2/CXCL2/PSAP/CXCL8/CXCL3/CXCR3/CXCL1/CXCL5/CCL2/CXCL9/CXCL16/CCRL2/C3AR1/FPR3/CCR1/CCR5/EDN1/C5AR1/FPR1/FPR2/CCL20/CXCL11/APP/CXCR4/XCL1/CCL19/CXCL13/ECE1	33
R-HSA-5617472	Activation of anterior HOX genes in hindbrain development during early embryogenesis	19/2093	122/10654	0.897689	1	0.631423	NCOA3/H2BC12/H3-3A/H2AZ1/H3-3B/POLR2K/POLR2L/MAFB/RXRA/EGR2/JUN/H2AJ/POLR2E/H4C3/POLR2C/POLR2H/RBBP4/EZH2/H2AZ2	19
R-HSA-5619507	Activation of HOX genes during differentiation	19/2093	122/10654	0.897689	1	0.631423	NCOA3/H2BC12/H3-3A/H2AZ1/H3-3B/POLR2K/POLR2L/MAFB/RXRA/EGR2/JUN/H2AJ/POLR2E/H4C3/POLR2C/POLR2H/RBBP4/EZH2/H2AZ2	19
R-HSA-112310	Neurotransmitter release cycle	7/2093	51/10654	0.897757	1	0.631423	VAMP2/SLC1A3/SLC38A2/HSPA8/GLS/ARL6IP5/SLC6A12	7
R-HSA-5620920	Cargo trafficking to the periciliary membrane	7/2093	51/10654	0.897757	1	0.631423	CCT5/CCT3/RAB8A/ASAP1/ARF4/EXOC5/RAB11A	7
R-HSA-8941326	RUNX2 regulates bone development	4/2093	32/10654	0.899071	1	0.631423	SRC/RB1/MAPK1/RUNX2	4
R-HSA-1474228	Degradation of the extracellular matrix	22/2093	140/10654	0.903499	1	0.631423	CD44/TIMP1/CTSD/CTSS/BSG/ADAM17/CTSB/FURIN/SPP1/CTSL/MMP14/MMP9/TIMP2/MMP19/ADAM9/ADAM8/PSEN1/ADAM10/CAPNS1/CAPN2/NCSTN/CASP3	22
R-HSA-157579	Telomere Maintenance	12/2093	82/10654	0.904678	1	0.631423	NHP2/POLD2/RPA3/POLD4/H2BC12/H2AZ1/H2AJ/H4C3/RFC1/RPA2/TINF2/H2AZ2	12
R-HSA-1971475	A tetrasaccharide linker sequence is required for GAG synthesis	3/2093	26/10654	0.909455	1	0.631423	VCAN/SDC2/SDC4	3
R-HSA-3238698	WNT ligand biogenesis and trafficking	3/2093	26/10654	0.909455	1	0.631423	SNX3/TMED5/VPS29	3
R-HSA-5223345	Miscellaneous transport and binding events	3/2093	26/10654	0.909455	1	0.631423	MAGT1/ADD3/ADD1	3
R-HSA-5693554	Resolution of D-loop Structures through Synthesis-Dependent Strand Annealing (SDSA)	3/2093	26/10654	0.909455	1	0.631423	BRCA2/ATM/NBN	3
R-HSA-189451	Heme biosynthesis	1/2093	11/10654	0.90993	1	0.631423	ALAS1	1
R-HSA-193048	Androgen biosynthesis	1/2093	11/10654	0.90993	1	0.631423	HSD17B12	1
R-HSA-2485179	Activation of the phototransduction cascade	1/2093	11/10654	0.90993	1	0.631423	GNB1	1
R-HSA-2534343	Interaction With Cumulus Cells And The Zona Pellucida	1/2093	11/10654	0.90993	1	0.631423	B4GALT1	1
R-HSA-390247	Beta-oxidation of very long chain fatty acids	1/2093	11/10654	0.90993	1	0.631423	HSD17B4	1
R-HSA-446107	Type I hemidesmosome assembly	1/2093	11/10654	0.90993	1	0.631423	PLEC	1
R-HSA-8963691	Phenylalanine and tyrosine metabolism	1/2093	11/10654	0.90993	1	0.631423	IL4I1	1
R-HSA-1482925	Acyl chain remodelling of PG	2/2093	19/10654	0.911703	1	0.631423	LPCAT1/LPGAT1	2
R-HSA-442660	Na+/Cl- dependent neurotransmitter transporters	2/2093	19/10654	0.911703	1	0.631423	SLC6A6/SLC6A12	2
R-HSA-5423646	Aflatoxin activation and detoxification	2/2093	19/10654	0.911703	1	0.631423	MGST1/MGST3	2
R-HSA-74259	Purine catabolism	2/2093	19/10654	0.911703	1	0.631423	ADPRM/GPX1	2
R-HSA-77595	Processing of Intronless Pre-mRNAs	2/2093	19/10654	0.911703	1	0.631423	PAPOLA/PABPN1	2
R-HSA-69473	G2/M DNA damage checkpoint	14/2093	95/10654	0.913754	1	0.631423	UBE2N/RPA3/YWHAZ/YWHAE/H2BC12/ATM/NBN/YWHAQ/SUMO1/YWHAG/H4C3/RPA2/RAD9A/YWHAB	14
R-HSA-211000	Gene Silencing by RNA	21/2093	136/10654	0.914872	1	0.631423	RAN/H2BC12/H3-3A/H2AZ1/H3-3B/POLR2K/POLR2L/DICER1/NUP58/NUP62/H2AJ/NUP214/TNRC6B/POLR2E/H4C3/TPR/POLR2C/POLR2H/NUP98/H2AZ2/HSP90AA1	21
R-HSA-1483166	Synthesis of PA	5/2093	40/10654	0.916583	1	0.631423	PLD1/GPD2/GPAT4/LPCAT1/AGPAT3	5
R-HSA-112315	Transmission across Chemical Synapses	45/2093	272/10654	0.91871	1	0.631423	GNG7/TUBA1B/PRKCB/TUBA1C/TUBB4B/GNG5/CALM2/CAMK4/CALM1/GNG2/GLUL/RAC1/GNAI2/GNB1/PRKAR1A/AP2S1/TUBA1A/VAMP2/SLC1A3/KCNJ2/TUBB6/SRC/GNB4/ALDH2/NPTN/GNB2/NRAS/SLC38A2/HSPA8/RPS6KA1/GLS/COMT/PRKAG2/PRKAR2A/SLC38A1/RPS6KA3/ARL6IP5/PRKACB/MAPK1/PRKAG1/TUBB2A/SLC6A12/KRAS/AP2M1/CALM3	45
R-HSA-1538133	G0 and Early G1	3/2093	27/10654	0.922386	1	0.631423	MYC/RBL2/RBBP4	3
R-HSA-1483257	Phospholipid metabolism	34/2093	212/10654	0.925421	1	0.631423	PIKFYVE/PLAAT4/CPNE3/PIK3R1/ARF1/TNFAIP8/PIP4K2A/LPCAT2/PLD3/PLD1/GPD2/MGLL/PIK3CB/MBOAT7/VAC14/GPAT4/PNPLA8/PIK3R5/SBF2/SLC44A1/LPCAT1/OSBPL8/GPCPD1/ARF3/MTMR6/PNPLA6/CDS2/RAB5A/LPIN2/LPIN1/CPNE1/PLAAT3/AGPAT3/LPGAT1	34
R-HSA-5654720	PI-3K cascade:FGFR4	2/2093	20/10654	0.926001	1	0.631423	GRB2/PIK3R1	2
R-HSA-174403	Glutathione synthesis and recycling	1/2093	12/10654	0.927643	1	0.631423	CNDP2	1
R-HSA-176974	Unwinding of DNA	1/2093	12/10654	0.927643	1	0.631423	MCM5	1
R-HSA-209822	Glycoprotein hormones	1/2093	12/10654	0.927643	1	0.631423	INHBA	1
R-HSA-71384	Ethanol oxidation	1/2093	12/10654	0.927643	1	0.631423	ALDH2	1
R-HSA-879518	Transport of organic anions	1/2093	12/10654	0.927643	1	0.631423	SLCO3A1	1
R-HSA-8866907	Activation of the TFAP2 (AP-2) family of transcription factors	1/2093	12/10654	0.927643	1	0.631423	CITED2	1
R-HSA-2672351	Stimuli-sensing channels	16/2093	109/10654	0.928329	1	0.631423	SRI/CALM2/CALM1/RPS27A/UBA52/UBB/STOM/UBC/SGK1/C8orf44-SGK3/ANO6/CLCN7/MCOLN2/OSTM1/CLIC2/CALM3	16
R-HSA-212300	PRC2 methylates histones and DNA	10/2093	73/10654	0.929224	1	0.631423	H2BC12/H3-3A/H2AZ1/H3-3B/H2AJ/JARID2/H4C3/RBBP4/EZH2/H2AZ2	10
R-HSA-110328	Recognition and association of DNA glycosylase with site containing an affected pyrimidine	8/2093	61/10654	0.932552	1	0.631423	MBD4/H2BC12/H2AZ1/H2AJ/H4C3/TINF2/H2AZ2/TDG	8
R-HSA-110329	Cleavage of the damaged pyrimidine	8/2093	61/10654	0.932552	1	0.631423	MBD4/H2BC12/H2AZ1/H2AJ/H4C3/TINF2/H2AZ2/TDG	8
R-HSA-73928	Depyrimidination	8/2093	61/10654	0.932552	1	0.631423	MBD4/H2BC12/H2AZ1/H2AJ/H4C3/TINF2/H2AZ2/TDG	8
R-HSA-1855204	Synthesis of IP3 and IP4 in the cytosol	3/2093	28/10654	0.933605	1	0.631423	CALM2/CALM1/CALM3	3
R-HSA-201451	Signaling by BMP	3/2093	28/10654	0.933605	1	0.631423	ZFYVE16/UBE2D1/UBE2D3	3
R-HSA-2022854	Keratan sulfate biosynthesis	3/2093	28/10654	0.933605	1	0.631423	B4GALT5/B4GALT1/B3GNT2	3
R-HSA-5668914	Diseases of metabolism	15/2093	104/10654	0.933941	1	0.631423	IDS/RPS27A/UBA52/UBB/UBC/TALDO1/GNS/CYP1B1/CSF2RB/CSF2RA/CYP27A1/GAA/GBE1/GYS1/MMAB	15
R-HSA-73886	Chromosome Maintenance	16/2093	110/10654	0.934184	1	0.631423	NHP2/MIS18BP1/POLD2/RPA3/POLD4/H2BC12/H2AZ1/NPM1/H2AJ/SMARCA5/H4C3/RFC1/RPA2/TINF2/RBBP4/H2AZ2	16
R-HSA-71406	Pyruvate metabolism and Citric Acid (TCA) cycle	7/2093	55/10654	0.935262	1	0.631423	ACO2/LDHB/VDAC1/SLC16A3/LDHA/BSG/RXRA	7
R-HSA-379726	Mitochondrial tRNA aminoacylation	2/2093	21/10654	0.938091	1	0.631423	QARS1/GARS1	2
R-HSA-5654689	PI-3K cascade:FGFR1	2/2093	21/10654	0.938091	1	0.631423	GRB2/PIK3R1	2
R-HSA-8849932	Synaptic adhesion-like molecules	2/2093	21/10654	0.938091	1	0.631423	FLOT1/RTN3	2
R-HSA-1912408	Pre-NOTCH Transcription and Translation	13/2093	93/10654	0.939901	1	0.631423	H2BC12/H3-3A/H2AZ1/H3-3B/RBPJ/NOTCH2/RUNX1/JUN/H2AJ/TNRC6B/MAML2/H4C3/H2AZ2	13
R-HSA-1237044	Erythrocytes take up carbon dioxide and release oxygen	1/2093	13/10654	0.941873	1	0.631423	CYB5R4	1
R-HSA-1480926	O2/CO2 exchange in erythrocytes	1/2093	13/10654	0.941873	1	0.631423	CYB5R4	1
R-HSA-1663150	The activation of arylsulfatases	1/2093	13/10654	0.941873	1	0.631423	SUMF2	1
R-HSA-2892247	POU5F1 (OCT4), SOX2, NANOG activate genes related to proliferation	1/2093	13/10654	0.941873	1	0.631423	STAT3	1
R-HSA-432047	Passive transport by Aquaporins	1/2093	13/10654	0.941873	1	0.631423	AQP9	1
R-HSA-5658623	FGFRL1 modulation of FGFR1 signaling	1/2093	13/10654	0.941873	1	0.631423	SPRED2	1
R-HSA-8847993	ERBB2 Activates PTK6 Signaling	1/2093	13/10654	0.941873	1	0.631423	EREG	1
R-HSA-110330	Recognition and association of DNA glycosylase with site containing an affected purine	7/2093	56/10654	0.942496	1	0.631423	MPG/H2BC12/H2AZ1/H2AJ/H4C3/TINF2/H2AZ2	7
R-HSA-110331	Cleavage of the damaged purine	7/2093	56/10654	0.942496	1	0.631423	MPG/H2BC12/H2AZ1/H2AJ/H4C3/TINF2/H2AZ2	7
R-HSA-73927	Depurination	7/2093	56/10654	0.942496	1	0.631423	MPG/H2BC12/H2AZ1/H2AJ/H4C3/TINF2/H2AZ2	7
R-HSA-9615017	FOXO-mediated transcription of oxidative stress, metabolic and neuronal genes	3/2093	29/10654	0.94331	1	0.631423	SOD2/FOXO3/HDAC2	3
R-HSA-425407	SLC-mediated transmembrane transport	40/2093	251/10654	0.945555	1	0.631423	SLC25A6/SLC50A1/SRI/SLC25A5/CALM2/CALM1/SLC16A3/BSG/SLC2A3/SLC39A8/SLC2A6/SLC1A3/SLC43A2/SLC11A1/SLC7A7/SLC7A11/SLC8A1/SLC15A3/SLC41A2/SLC7A5/SLC11A2/SLC30A1/SLC6A6/SLC36A4/SLCO3A1/RUNX1/SLC31A1/SLC44A1/SLC38A2/SLC39A1/SLC20A1/SLC30A7/SLC3A2/SLC38A1/SLC15A4/SLC39A7/SLC6A12/SLC2A1/SLC7A1/CALM3	40
R-HSA-3214842	HDMs demethylate histones	6/2093	50/10654	0.946157	1	0.631423	ARID5B/KDM7A/KDM6B/H4C3/JMJD6/KDM2B	6
R-HSA-73728	RNA Polymerase I Promoter Opening	8/2093	63/10654	0.946201	1	0.631423	H2BC12/H3-3A/H2AZ1/H3-3B/MBD2/H2AJ/H4C3/H2AZ2	8
R-HSA-427389	ERCC6 (CSB) and EHMT2 (G9a) positively regulate rRNA expression	10/2093	76/10654	0.948195	1	0.631423	H2BC12/H3-3A/H2AZ1/H3-3B/H2AJ/H4C3/RBBP4/CHD4/H2AZ2/HDAC2	10
R-HSA-140837	Intrinsic Pathway of Fibrin Clot Formation	2/2093	22/10654	0.94829	1	0.631423	SERPING1/PRCP	2
R-HSA-5693532	DNA Double-Strand Break Repair	25/2093	166/10654	0.948661	1	0.631423	PARP1/UBE2N/POLD2/BRCA2/RPA3/POLD4/H2BC12/ATM/RPS27A/UBA52/UBB/NBN/UBC/PPP4C/SUMO1/PPP4R2/SMARCA5/H4C3/RFC1/RPA2/RAD9A/UBE2I/MAPK8/XRCC6/SUMO2	25
R-HSA-176187	Activation of ATR in response to replication stress	4/2093	37/10654	0.950315	1	0.631423	MCM5/RPA3/RPA2/RAD9A	4
R-HSA-373080	Class B/2 (Secretin family receptors)	13/2093	95/10654	0.950349	1	0.631423	GNG7/GNG5/GNG2/ADGRE5/GNB1/ADM/ADGRE2/GNB4/GNB2/CD55/GNAS/RAMP1/CALCRL	13
R-HSA-1482839	Acyl chain remodelling of PE	3/2093	30/10654	0.951684	1	0.631423	PLAAT4/PNPLA8/PLAAT3	3
R-HSA-166786	Creation of C4 and C2 activators	1/2093	14/10654	0.953306	1	0.631423	FCN1	1
R-HSA-170670	Adenylate cyclase inhibitory pathway	1/2093	14/10654	0.953306	1	0.631423	GNAI2	1
R-HSA-209952	Peptide hormone biosynthesis	1/2093	14/10654	0.953306	1	0.631423	INHBA	1
R-HSA-3296469	Defects in cobalamin (B12) metabolism	1/2093	14/10654	0.953306	1	0.631423	MMAB	1
R-HSA-6804759	Regulation of TP53 Activity through Association with Co-factors	1/2093	14/10654	0.953306	1	0.631423	ZNF385A	1
R-HSA-418594	G alpha (i) signalling events	67/2093	406/10654	0.956655	1	0.631423	GNG7/CXCR5/ANXA1/RGS19/CXCL10/PPP1CA/RGS16/GNG5/CALM2/CAMK4/RGS1/PDE4D/RGS10/CALM1/CCR7/GNG2/CXCL2/PSAP/CXCL8/GNAI2/CXCL3/GNB1/PRKAR1A/CXCR3/GPR183/CXCL1/CXCL5/CXCL9/CXCL16/C3AR1/FPR3/CCR1/CCR5/SUCNR1/HCAR3/SDC2/C5AR1/SDC4/FPR1/HCAR2/SRC/LRP1/FPR2/GNB4/CCL20/CXCL11/PPP2CB/APP/PDE4B/PDE4A/GNB2/AHCYL1/ITPR2/PPP2CA/PRKAR2A/GNAS/CXCR4/PRKACB/NMT2/AKR1C3/MAPK1/CCL19/CXCL13/OPN3/NMT1/CALM3/GPSM3	67
R-HSA-1482801	Acyl chain remodelling of PS	2/2093	23/10654	0.956873	1	0.631423	OSBPL8/PLAAT3	2
R-HSA-5620922	BBSome-mediated cargo-targeting to cilium	2/2093	23/10654	0.956873	1	0.631423	CCT5/CCT3	2
R-HSA-5654695	PI-3K cascade:FGFR2	2/2093	23/10654	0.956873	1	0.631423	GRB2/PIK3R1	2
R-HSA-397014	Muscle contraction	32/2093	209/10654	0.95698	1	0.631423	ORAI2/ANXA1/MYL6B/ATP2B1/ANXA2/HIPK2/SRI/CALM2/TPM3/CALM1/MYL12A/MYL6/TLN1/TPM4/VIM/ANXA6/MYL12B/ATP1B3/KCNJ2/SLC8A1/KCNE1/ATP2A2/AHCYL1/PAK1/HIPK1/PAK2/ITPR2/AKAP9/ATP2B4/CLIC2/FXYD2/CALM3	32
R-HSA-1566948	Elastic fibre formation	5/2093	45/10654	0.957216	1	0.631423	FURIN/ITGB8/EMILIN2/ITGAV/ITGA5	5
R-HSA-73894	DNA Repair	54/2093	334/10654	0.95756	1	0.631423	PARP1/TCEA1/ACTB/UBE2N/POLD2/BRCA2/RPA3/MPG/POLD4/UBE2L6/RBX1/MBD4/RAD23A/H2BC12/APEX1/H2AZ1/ATM/RPS27A/UBA52/UBB/NBN/UBC/POLR2K/PPP4C/POLR2L/SUMO1/ISG15/ELL/H2AJ/RAD23B/VCP/PPP4R2/SUMO3/SMARCA5/TRIM25/POLR2E/HMGN1/H4C3/RFC1/COPS6/RPA2/POLR2C/POLR2H/MNAT1/RAD9A/TINF2/UBE2I/MAPK8/H2AZ2/MAD2L2/TDG/XRCC6/SUMO2/UBE2B	54
R-HSA-156580	Phase II - Conjugation of compounds	15/2093	109/10654	0.958043	1	0.631423	AKR1A1/CNDP2/MAT2A/GSTP1/TRMT112/UGP2/GSTK1/GSTO1/MGST1/IMPAD1/PAPSS1/COMT/MGST3/ABHD14B/ESD	15
R-HSA-171306	Packaging Of Telomere Ends	6/2093	52/10654	0.958357	1	0.631423	H2BC12/H2AZ1/H2AJ/H4C3/TINF2/H2AZ2	6
R-HSA-2022928	HS-GAG biosynthesis	3/2093	31/10654	0.95889	1	0.631423	SDC2/SDC4/HS3ST3B1	3
R-HSA-399719	Trafficking of AMPA receptors	3/2093	31/10654	0.95889	1	0.631423	PRKCB/AP2S1/AP2M1	3
R-HSA-399721	Glutamate binding, activation of AMPA receptors and synaptic plasticity	3/2093	31/10654	0.95889	1	0.631423	PRKCB/AP2S1/AP2M1	3
R-HSA-445095	Interaction between L1 and Ankyrins	3/2093	31/10654	0.95889	1	0.631423	ACTB/ACTG1/ANK3	3
R-HSA-549132	Organic cation/anion/zwitterion transport	1/2093	15/10654	0.962492	1	0.631423	RUNX1	1
R-HSA-8866910	TFAP2 (AP-2) family regulates transcription of growth factors and their receptors	1/2093	15/10654	0.962492	1	0.631423	VEGFA	1
R-HSA-140877	Formation of Fibrin Clot (Clotting Cascade)	4/2093	39/10654	0.963053	1	0.631423	SERPING1/F3/PRCP/TFPI	4
R-HSA-977068	Termination of O-glycan biosynthesis	2/2093	24/10654	0.964081	1	0.631423	ST6GALNAC4/ST6GAL1	2
R-HSA-6806667	Metabolism of fat-soluble vitamins	5/2093	47/10654	0.967628	1	0.631423	VKORC1/SDC2/SDC4/LRP1/AKR1C3	5
R-HSA-2299718	Condensation of Prophase Chromosomes	9/2093	74/10654	0.968161	1	0.631423	SET/H2BC12/H3-3A/H2AZ1/H3-3B/RB1/H2AJ/H4C3/H2AZ2	9
R-HSA-606279	Deposition of new CENPA-containing nucleosomes at the centromere	9/2093	74/10654	0.968161	1	0.631423	MIS18BP1/H2BC12/H2AZ1/NPM1/H2AJ/SMARCA5/H4C3/RBBP4/H2AZ2	9
R-HSA-774815	Nucleosome assembly	9/2093	74/10654	0.968161	1	0.631423	MIS18BP1/H2BC12/H2AZ1/NPM1/H2AJ/SMARCA5/H4C3/RBBP4/H2AZ2	9
R-HSA-156711	Polo-like kinase mediated events	1/2093	16/10654	0.969871	1	0.631423	RBBP4	1
R-HSA-204174	Regulation of pyruvate dehydrogenase (PDH) complex	1/2093	16/10654	0.969871	1	0.631423	RXRA	1
R-HSA-429958	mRNA decay by 3' to 5' exoribonuclease	1/2093	16/10654	0.969871	1	0.631423	EXOSC8	1
R-HSA-211981	Xenobiotics	2/2093	25/10654	0.970123	1	0.631423	ARNT2/AHR	2
R-HSA-427359	SIRT1 negatively regulates rRNA expression	8/2093	68/10654	0.970205	1	0.631423	H2BC12/H3-3A/H2AZ1/H3-3B/H2AJ/TAF1D/H4C3/H2AZ2	8
R-HSA-5693568	Resolution of D-loop Structures through Holliday Junction Intermediates	3/2093	33/10654	0.97038	1	0.631423	BRCA2/ATM/NBN	3
R-HSA-68962	Activation of the pre-replicative complex	3/2093	33/10654	0.97038	1	0.631423	MCM5/RPA3/RPA2	3
R-HSA-5693537	Resolution of D-Loop Structures	3/2093	34/10654	0.974914	1	0.631423	BRCA2/ATM/NBN	3
R-HSA-6794361	Neurexins and neuroligins	6/2093	56/10654	0.97554	1	0.631423	SIPA1L1/DBNL/EPB41L3/PDLIM5/EPB41/DLGAP4	6
R-HSA-199220	Vitamin B5 (pantothenate) metabolism	1/2093	17/10654	0.975798	1	0.631423	PANK3	1
R-HSA-264642	Acetylcholine Neurotransmitter Release Cycle	1/2093	17/10654	0.975798	1	0.631423	VAMP2	1
R-HSA-8936459	RUNX1 regulates genes involved in megakaryocyte differentiation and platelet function	12/2093	97/10654	0.97881	1	0.631423	PRMT1/H2BC12/H3-3A/H2AZ1/H3-3B/KMT2E/RUNX1/NR4A3/H2AJ/TNRC6B/H4C3/H2AZ2	12
R-HSA-421270	Cell-cell junction organization	7/2093	64/10654	0.978887	1	0.631423	ACTB/ACTG1/NECTIN2/CTNNA1/CTNND1/CTNNB1/PVR	7
R-HSA-5576891	Cardiac conduction	19/2093	141/10654	0.979138	1	0.631423	ORAI2/ATP2B1/HIPK2/SRI/CALM2/CALM1/ATP1B3/KCNJ2/SLC8A1/KCNE1/ATP2A2/AHCYL1/HIPK1/ITPR2/AKAP9/ATP2B4/CLIC2/FXYD2/CALM3	19
R-HSA-5576893	Phase 2 - plateau phase	2/2093	27/10654	0.979402	1	0.631423	KCNE1/AKAP9	2
R-HSA-975634	Retinoid metabolism and transport	4/2093	43/10654	0.979946	1	0.631423	SDC2/SDC4/LRP1/AKR1C3	4
R-HSA-1474244	Extracellular matrix organization	46/2093	301/10654	0.980047	1	0.631423	CD44/TIMP1/ICAM1/CTSD/P4HB/ITGB2/CTSS/BSG/ADAM17/ITGAE/CTSB/FURIN/ITGAL/PPIB/ITGA4/P4HA1/SPP1/CTSL/VCAN/MMP14/ITGB8/MMP9/TIMP2/SDC2/ITGAX/SDC4/EMILIN2/MMP19/ADAM9/ITGAV/ADAM8/APP/PSEN1/PLEC/ADAM10/ACTN1/CAPNS1/ITGA5/CAPN2/NCSTN/ICAM3/CD47/ICAM2/NCAM1/ADAM19/CASP3	46
R-HSA-1369062	ABC transporters in lipid homeostasis	1/2093	18/10654	0.98056	1	0.631423	ABCG1	1
R-HSA-162710	Synthesis of glycosylphosphatidylinositol (GPI)	1/2093	18/10654	0.98056	1	0.631423	PIGA	1
R-HSA-181429	Serotonin Neurotransmitter Release Cycle	1/2093	18/10654	0.98056	1	0.631423	VAMP2	1
R-HSA-181430	Norepinephrine Neurotransmitter Release Cycle	1/2093	18/10654	0.98056	1	0.631423	VAMP2	1
R-HSA-8963889	Assembly of active LPL and LIPC lipase complexes	1/2093	18/10654	0.98056	1	0.631423	FURIN	1
R-HSA-9037629	Lewis blood group biosynthesis	1/2093	18/10654	0.98056	1	0.631423	ST6GALNAC6	1
R-HSA-5334118	DNA methylation	7/2093	65/10654	0.981486	1	0.631423	H2BC12/H3-3A/H2AZ1/H3-3B/H2AJ/H4C3/H2AZ2	7
R-HSA-390522	Striated Muscle Contraction	3/2093	36/10654	0.982078	1	0.631423	TPM3/TPM4/VIM	3
R-HSA-1614635	Sulfur amino acid metabolism	2/2093	28/10654	0.982925	1	0.631423	TSTD1/SQOR	2
R-HSA-69205	G1/S-Specific Transcription	2/2093	28/10654	0.982925	1	0.631423	RBL2/RBBP4	2
R-HSA-5576886	Phase 4 - resting membrane potential	1/2093	19/10654	0.984386	1	0.631423	KCNJ2	1
R-HSA-5625886	Activated PKN1 stimulates transcription of AR (androgen receptor) regulated genes KLK2 and KLK3	7/2093	67/10654	0.985818	1	0.631423	H2BC12/H3-3A/H2AZ1/H3-3B/H2AJ/H4C3/H2AZ2	7
R-HSA-390918	Peroxisomal lipid metabolism	2/2093	29/10654	0.985859	1	0.631423	SCP2/HSD17B4	2
R-HSA-2129379	Molecules associated with elastic fibres	3/2093	38/10654	0.987261	1	0.631423	ITGB8/EMILIN2/ITGAV	3
R-HSA-190241	FGFR2 ligand binding and activation	1/2093	20/10654	0.987459	1	0.631423	FGFBP2	1
R-HSA-9603798	Class I peroxisomal membrane protein import	1/2093	20/10654	0.987459	1	0.631423	PEX2	1
R-HSA-8963899	Plasma lipoprotein remodeling	2/2093	30/10654	0.9883	1	0.631423	FURIN/ABCG1	2
R-HSA-3247509	Chromatin modifying enzymes	40/2093	274/10654	0.988511	1	0.631423	SMARCB1/PRMT1/ACTB/CDK4/H2BC12/ENY2/RPS2/H2AZ1/NFKB1/MSL3/ARID5B/TADA3/NFKB2/SMARCE1/KMT2E/MEAF6/KDM7A/KDM6B/JAK2/NCOR2/H2AJ/RELA/MORF4L2/H4C3/SMARCC2/NCOA1/JMJD6/ARID4B/RBBP4/CHD4/ING3/EPC1/KDM2B/EZH2/ARID1B/H2AZ2/PBRM1/SMARCC1/HDAC2/MORF4L1	40
R-HSA-4839726	Chromatin organization	40/2093	274/10654	0.988511	1	0.631423	SMARCB1/PRMT1/ACTB/CDK4/H2BC12/ENY2/RPS2/H2AZ1/NFKB1/MSL3/ARID5B/TADA3/NFKB2/SMARCE1/KMT2E/MEAF6/KDM7A/KDM6B/JAK2/NCOR2/H2AJ/RELA/MORF4L2/H4C3/SMARCC2/NCOA1/JMJD6/ARID4B/RBBP4/CHD4/ING3/EPC1/KDM2B/EZH2/ARID1B/H2AZ2/PBRM1/SMARCC1/HDAC2/MORF4L1	40
R-HSA-5693571	Nonhomologous End-Joining (NHEJ)	7/2093	69/10654	0.989188	1	0.631423	UBE2N/H2BC12/ATM/NBN/SUMO1/H4C3/XRCC6	7
R-HSA-196741	Cobalamin (Cbl, vitamin B12) transport and metabolism	1/2093	21/10654	0.989927	1	0.631423	MMAB	1
R-HSA-1638091	Heparan sulfate/heparin (HS-GAG) metabolism	5/2093	55/10654	0.989971	1	0.631423	IDS/VCAN/SDC2/SDC4/HS3ST3B1	5
R-HSA-3214841	PKMTs methylate histone lysines	7/2093	71/10654	0.991794	1	0.631423	NFKB1/NFKB2/KMT2E/RELA/H4C3/RBBP4/EZH2	7
R-HSA-3296482	Defects in vitamin and cofactor metabolism	1/2093	22/10654	0.99191	1	0.631423	MMAB	1
R-HSA-5365859	RA biosynthesis pathway	1/2093	22/10654	0.99191	1	0.631423	AKR1C3	1
R-HSA-71403	Citric acid cycle (TCA cycle)	1/2093	22/10654	0.99191	1	0.631423	ACO2	1
R-HSA-9033658	Blood group systems biosynthesis	1/2093	22/10654	0.99191	1	0.631423	ST6GALNAC6	1
R-HSA-5619102	SLC transporter disorders	11/2093	99/10654	0.992108	1	0.631423	BSG/SLC1A3/SLC7A7/SLC11A2/NUP58/NUP62/NUP214/SLC3A2/TPR/SLC2A1/NUP98	11
R-HSA-211945	Phase I - Functionalization of compounds	12/2093	106/10654	0.992383	1	0.631423	HSP90AB1/CYP1B1/CYP27A1/ARNT2/CES1/RXRA/ALDH2/CYB5R3/AHR/NCOA1/CYB5B/NQO2	12
R-HSA-72306	tRNA processing	12/2093	107/10654	0.993234	1	0.631423	RTCB/RAN/HSD17B10/TRMT112/NUP58/NUP62/NUP214/RTRAF/TRMT10C/TPR/ZBTB8OS/NUP98	12
R-HSA-1483249	Inositol phosphate metabolism	4/2093	50/10654	0.993453	1	0.631423	CALM2/CALM1/NUDT3/CALM3	4
R-HSA-212676	Dopamine Neurotransmitter Release Cycle	1/2093	23/10654	0.993503	1	0.631423	VAMP2	1
R-HSA-419037	NCAM1 interactions	3/2093	42/10654	0.993648	1	0.631423	NCAM1/PRNP/ST8SIA4	3
R-HSA-211897	Cytochrome P450 - arranged by substrate type	6/2093	66/10654	0.994093	1	0.631423	CYP1B1/CYP27A1/ARNT2/RXRA/AHR/NCOA1	6
R-HSA-5362517	Signaling by Retinoic Acid	3/2093	43/10654	0.994675	1	0.631423	FABP5/RXRA/AKR1C3	3
R-HSA-425397	Transport of vitamins, nucleosides, and related molecules	3/2093	44/10654	0.995541	1	0.631423	SLC25A6/SLC25A5/SLCO3A1	3
R-HSA-156588	Glucuronidation	1/2093	25/10654	0.995809	1	0.631423	UGP2	1
R-HSA-2022090	Assembly of collagen fibrils and other multimeric structures	5/2093	61/10654	0.996037	1	0.631423	CTSS/CTSB/CTSL/MMP9/PLEC	5
R-HSA-5579029	Metabolic disorders of biological oxidation enzymes	2/2093	36/10654	0.99631	1	0.631423	CYP1B1/CYP27A1	2
R-HSA-5576892	Phase 0 - rapid depolarisation	3/2093	46/10654	0.996881	1	0.631423	CALM2/CALM1/CALM3	3
R-HSA-373076	Class A/1 (Rhodopsin-like receptors)	47/2093	335/10654	0.997416	1	0.631423	CXCR5/ANXA1/CXCL10/CCL22/LPAR6/CCR7/XCL2/CXCL2/PSAP/CXCL8/CYSLTR1/CXCL3/PTGER4/GPR65/CXCR3/GPR183/CXCL1/CXCL5/CCL2/CXCL9/PTAFR/CXCL16/CCRL2/C3AR1/FPR3/CCR1/CCR5/SUCNR1/HCAR3/FFAR2/PTGIR/EDN1/C5AR1/FPR1/HCAR2/FPR2/CCL20/CXCL11/APP/GPR132/P2RY10/CXCR4/XCL1/CCL19/CXCL13/OPN3/ECE1	47
R-HSA-913709	O-linked glycosylation of mucins	5/2093	64/10654	0.997542	1	0.631423	ST6GALNAC4/ST6GAL1/GALNT2/B4GALT5/B3GNT2	5
R-HSA-6794362	Protein-protein interactions at synapses	8/2093	87/10654	0.997599	1	0.631423	SIPA1L1/DBNL/FLOT1/EPB41L3/PDLIM5/RTN3/EPB41/DLGAP4	8
R-HSA-3781865	Diseases of glycosylation	16/2093	143/10654	0.997711	1	0.631423	ALG13/VCAN/SDC2/SDC4/HEXB/B4GALT1/NOTCH2/CFP/CTSA/NUS1/ALG2/MGAT2/CHSY1/NEU1/PGM1/HEXA	16
R-HSA-3295583	TRP channels	1/2093	28/10654	0.99783	1	0.631423	MCOLN2	1
R-HSA-2187338	Visual phototransduction	10/2093	103/10654	0.998054	1	0.631423	CALM2/CALM1/GNB1/SDC2/SDC4/LRP1/NMT2/AKR1C3/NMT1/CALM3	10
R-HSA-6803157	Antimicrobial peptides	9/2093	97/10654	0.998353	1	0.631423	GNLY/LYZ/ATOX1/S100A9/S100A8/SLC11A1/TLR2/RNASE6/TLR1	9
R-HSA-1474290	Collagen formation	8/2093	90/10654	0.998438	1	0.631423	P4HB/CTSS/CTSB/PPIB/P4HA1/CTSL/MMP9/PLEC	8
R-HSA-3000171	Non-integrin membrane-ECM interactions	4/2093	59/10654	0.998558	1	0.631423	SDC2/SDC4/ITGAV/ACTN1	4
R-HSA-3000157	Laminin interactions	1/2093	30/10654	0.9986	1	0.631423	ITGAV	1
R-HSA-8874081	MET activates PTK2 signaling	1/2093	30/10654	0.9986	1	0.631423	SRC	1
R-HSA-1461957	Beta defensins	2/2093	42/10654	0.998863	1	0.631423	TLR2/TLR1	2
R-HSA-186712	Regulation of beta-cell development	2/2093	42/10654	0.998863	1	0.631423	RBPJ/MAML2	2
R-HSA-389661	Glyoxylate metabolism and glycine degradation	1/2093	31/10654	0.998876	1	0.631423	NDUFAB1	1
R-HSA-211859	Biological oxidations	27/2093	222/10654	0.998957	1	0.631423	HSP90AB1/AKR1A1/CNDP2/MAT2A/GSTP1/TRMT112/UGP2/GSTK1/GSTO1/CYP1B1/CYP27A1/ARNT2/CES1/MGST1/RXRA/ALDH2/CYB5R3/AHR/IMPAD1/PAPSS1/COMT/MGST3/ABHD14B/ESD/NCOA1/CYB5B/NQO2	27
R-HSA-3000178	ECM proteoglycans	5/2093	76/10654	0.999662	1	0.631423	VCAN/ITGAX/ITGAV/APP/NCAM1	5
R-HSA-163125	Post-translational modification: synthesis of GPI-anchored proteins	7/2093	93/10654	0.999691	1	0.631423	CD52/PLAUR/LY6E/PGAP1/CPM/OTOA/PIGA	7
R-HSA-5083635	Defective B3GALTL causes Peters-plus syndrome (PpS)	1/2093	37/10654	0.999699	1	0.631423	CFP	1
R-HSA-3214815	HDACs deacetylate histones	7/2093	94/10654	0.999736	1	0.631423	H2BC12/NCOR2/H4C3/ARID4B/RBBP4/CHD4/HDAC2	7
R-HSA-5173214	O-glycosylation of TSR domain-containing proteins	1/2093	38/10654	0.999758	1	0.631423	CFP	1
R-HSA-1461973	Defensins	2/2093	52/10654	0.999846	1	0.631423	TLR2/TLR1	2
R-HSA-112316	Neuronal System	54/2093	413/10654	0.999869	1	0.631423	GNG7/TUBA1B/PRKCB/SIPA1L1/TUBA1C/DBNL/TUBB4B/GNG5/CALM2/CAMK4/CALM1/GNG2/GLUL/RAC1/GNAI2/FLOT1/GNB1/PRKAR1A/AP2S1/TUBA1A/VAMP2/SLC1A3/EPB41L3/KCNJ2/TUBB6/SRC/GNB4/ALDH2/NPTN/KCNN4/PDLIM5/GNB2/NRAS/SLC38A2/HSPA8/RTN3/RPS6KA1/GLS/COMT/PRKAG2/PRKAR2A/SLC38A1/RPS6KA3/ARL6IP5/PRKACB/EPB41/MAPK1/PRKAG1/TUBB2A/SLC6A12/DLGAP4/KRAS/AP2M1/CALM3	54
R-HSA-1296071	Potassium Channels	7/2093	99/10654	0.999881	1	0.631423	GNG7/GNG5/GNG2/GNB1/KCNJ2/KCNN4/GNB2	7
R-HSA-6782315	tRNA modification in the nucleus and cytosol	1/2093	43/10654	0.999919	1	0.631423	TRMT112	1
R-HSA-3214847	HATs acetylate histones	12/2093	142/10654	0.999934	1	0.631423	ACTB/H2BC12/ENY2/MSL3/TADA3/MEAF6/MORF4L2/H4C3/NCOA1/ING3/EPC1/MORF4L1	12
R-HSA-1650814	Collagen biosynthesis and modifying enzymes	3/2093	67/10654	0.999938	1	0.631423	P4HB/PPIB/P4HA1	3
R-HSA-500792	GPCR ligand binding	60/2093	468/10654	0.999974	1	0.631423	GNG7/CXCR5/ANXA1/CXCL10/CCL22/GNG5/LPAR6/CCR7/XCL2/GNG2/CXCL2/PSAP/CXCL8/CYSLTR1/CXCL3/ADGRE5/GNB1/PTGER4/GPR65/CXCR3/GPR183/CXCL1/CXCL5/CCL2/CXCL9/ADM/PTAFR/CXCL16/CCRL2/C3AR1/FPR3/CCR1/CCR5/ADGRE2/SUCNR1/HCAR3/FFAR2/PTGIR/EDN1/C5AR1/FPR1/HCAR2/FPR2/GNB4/CCL20/CXCL11/APP/GNB2/GPR132/CD55/P2RY10/GNAS/CXCR4/XCL1/RAMP1/CCL19/CALCRL/CXCL13/OPN3/ECE1	60
R-HSA-3906995	Diseases associated with O-glycosylation of proteins	2/2093	68/10654	0.999994	1	0.631423	NOTCH2/CFP	2
R-HSA-5173105	O-linked glycosylation	6/2093	112/10654	0.999997	1	0.631423	ST6GALNAC4/ST6GAL1/GALNT2/B4GALT5/CFP/B3GNT2	6
R-HSA-6809371	Formation of the cornified envelope	3/2093	129/10654	1	1	0.631423	FURIN/CSTA/CAPNS1	3
R-HSA-381753	Olfactory Signaling Pathway	2/2093	393/10654	1	1	0.631423	GNB1/RTP4	2
R-HSA-6805567	Keratinization	3/2093	214/10654	1	1	0.631423	FURIN/CSTA/CAPNS1	3

## Sheet: Table S3
Supplementary Table S3. References associating DEGS of the Interferon and toll-like receptor signaling cascades from the scRNAseq data (REF).
Interferon Signaling	Reference or Enrichment analysis		Toll-like Receptor Cascades	Reference
IRF8	doi.org/10.1074/jbc.M507788200		CD14	10.1046/j.1432-1327.2000.00956.x
OAS1	10.5483/BMBRep.2019.52.2.129		TLR1	doi.org/10.1038/sj.gene.6363791
IFNG	doi.org/10.1038/jid.2015.125		MAP3K8	10.1074/jbc.M113.519934
ISG15	10.1016/j.celrep.2020.107772		IRAK2	doi.org/10.1002/hep.28105
IFIT3	doi.org/10.1159/000511915		NFKB1	10.1089/jir.2011.0028
MX1	10.1089/jir.2011.0091		NFKBIA	10.1089/jir.2011.0028
IFIT1	10.1089/jir.2011.0091		FOS	10.1089/jir.1988.8.105
OAS3	10.5483/BMBRep.2019.52.2.129		BTK	10.1016/j.celrep.2015.01.039
GBP5	doi.org/10.1159/000460294		CTSS	10.1371/journal.pone.0184781
OAS2	10.1089/vim.2020.0238		HMGB1	10.4049/jimmunol.170.7.3890
PTPN1	10.1016/j.molimm.2008.05.006		NFKB2	10.1089/jir.2011.0028
BST2	doi.org/10.1016/j.cellsig.2013.08.042		S100A8	doi.org/10.4049/jimmunol.164.9.4916
IFITM2	doi.org/10.1016/j.celrep.2015.09.048		TLR2	10.4049/jimmunol.1401605
CD44	10.4049/jimmunol.180.6.4235		TLR8	doi.org/10.1038/cmi.2012.38
IFI35	10.1016/j.brainres.2017.01.018		TLR4	10.1016/j.celrep.2020.03.008
SAMHD1	10.1016/j.celrep.2020.03.008		PELI1	doi.org/10.1186/s13578-015-0024-z
EIF4A1	doi.org/10.1177/0394632017716048		IRAK1	10.4049/jimmunol.1102181
JAK1	https://doi.org/10.1038/cmi.2014.107		JUN	10.1074/jbc.M607674200
IRF9	10.1089/jir.2011.0091		TBK1	10.3389/fimmu.2018.00084
SOCS3	10.1371/journal.pone.0039592		MAPKAPK2	10.1016/s0163-7258(03)00016-0
EGR1	doi.org/10.3389/fimmu.2019.01180		MAPKAPK3	10.1016/s0163-7258(03)00016-0
FLNA	dx.doi.org/10.20517/2347-8659.2017.50		MAP3K1	10.1177/1947601913513950
JAK2	0.1128/IAI.00403-13		MYD88	10.1371/journal.pone.0023135
ADAR	10.1128/JVI.01571-13		RELA	10.4049/jimmunol.1000114
IRF4	10.1073/pnas.0508327102		CASP8	10.1128/MCB.01430-12
STAT1	10.1038/icb.2014.51		MAPK1	10.1186/1743-422X-8-157
UBE2N	Enrichment analysis		UBE2D3	doi.org/10.1038/ncomms15138
IRF7	Enrichment analysis		MAPK8	10.1186/1743-422X-8-157
RPS27A	Enrichment analysis		TRAF3	10.4161/cc.5.8.2637
UBA52	Enrichment analysis		UBE2N	Enrichment analysis
UBB	Enrichment analysis		IRF7	Enrichment analysis
UBC	Enrichment analysis		RPS27A	Enrichment analysis
IRF3	Enrichment analysis		UBA52	Enrichment analysis
			UBB	Enrichment analysis
			UBC	Enrichment analysis
			IRF3	Enrichment analysis

## Sheet: Table S4
Supplementary Table S4. Signaling pathways enriched by DEGs from GSE42606 (PBMCs) .
ID	Description	GeneRatio	BgRatio	pvalue	p.adjust	qvalue	geneID	Count
R-HSA-913531	Interferon Signaling	47/229	199/10654	2.50078e-36	1.50797e-33	1.3083e-33	ADAR/TRIM22/IRF9/IFITM3/IFI30/IFITM2/USP18/GBP4/GBP5/DDX58/IFI6/GBP1/IRF8/IFI35/IFIT2/IFIT1/IFIT3/IFNB1/IFNG/IRF1/IRF7/ISG20/MT2A/MX1/MX2/OAS1/OAS2/OAS3/HERC5/PML/XAF1/EIF2AK2/PSMB8/TRIM21/STAT1/STAT2/BST2/TRIM25/TRIM8/IFITM1/TRIM5/OASL/SOCS1/SOCS3/RSAD2/UBE2L6/ISG15	47
R-HSA-909733	Interferon alpha/beta signaling	31/229	69/10654	4.96333e-34	1.49644e-31	1.2983e-31	ADAR/IRF9/IFITM3/IFITM2/USP18/IFI6/IRF8/IFI35/IFIT2/IFIT1/IFIT3/IFNB1/IRF1/IRF7/ISG20/MX1/MX2/OAS1/OAS2/OAS3/XAF1/PSMB8/STAT1/STAT2/BST2/IFITM1/OASL/SOCS1/SOCS3/RSAD2/ISG15	31
R-HSA-6783783	Interleukin-10 signaling	21/229	47/10654	2.89981e-23	5.82862e-21	5.05687e-21	CSF2/FPR1/CXCL1/CXCL2/IL1A/IL1B/IL1RN/IL6/CXCL8/IL12B/CXCL10/CCL4L1/CCL3L3/PTGS2/CCL2/CCL3/CCL3L1/CCL20/TNF/CCR2/CD86	21
R-HSA-449147	Signaling by Interleukins	47/229	461/10654	1.21406e-19	1.83019e-17	1.58786e-17	CEBPD/BATF/MAP3K8/CSF1R/CSF2/CLCF1/FOS/FPR1/CXCL1/CXCL2/IL19/IFNG/IL1A/IL1B/IL1RN/IL2RA/IL6/CXCL8/IL12B/CXCL10/IRAK2/CCL4L1/CCL3L3/MYC/NFKB1/NFKBIA/SERPINB2/PIM1/IL36G/PSMB8/PTGS2/RPS6KA1/CCL2/CCL3/CCL3L1/CCL20/STAT1/STAT2/TNF/CCR2/MAPKAPK3/SOCS1/RIPK2/IL18RAP/SOCS2/SOCS3/CD86	47
R-HSA-877300	Interferon gamma signaling	23/229	92/10654	1.10554e-18	1.33329e-16	1.15675e-16	TRIM22/IRF9/IFI30/GBP4/GBP5/GBP1/IRF8/IFNG/IRF1/IRF7/MT2A/OAS1/OAS2/OAS3/PML/TRIM21/STAT1/TRIM25/TRIM8/TRIM5/OASL/SOCS1/SOCS3	23
R-HSA-380108	Chemokine receptors bind chemokines	16/229	59/10654	5.94285e-14	5.97256e-12	5.18174e-12	CXCL1/CXCL2/CXCL8/CXCL10/CCL4L1/CCL3L3/CXCL9/CCL2/CCL3/CCL3L1/CCL7/CCL20/CXCL11/CXCL5/CCR2/CCRL2	16
R-HSA-1169410	Antiviral mechanism by IFN-stimulated genes	15/229	80/10654	1.17483e-10	1.01204e-08	8.78034e-09	USP18/DDX58/IFIT1/MX1/MX2/OAS1/OAS2/OAS3/HERC5/EIF2AK2/STAT1/TRIM25/OASL/UBE2L6/ISG15	15
R-HSA-6785807	Interleukin-4 and Interleukin-13 signaling	16/229	108/10654	1.08429e-09	8.17282e-08	7.09067e-08	CEBPD/BATF/FOS/IL1A/IL1B/IL6/CXCL8/IL12B/MYC/PIM1/PTGS2/CCL2/STAT1/TNF/SOCS1/SOCS3	16
R-HSA-375276	Peptide ligand-binding receptors	20/229	201/10654	1.11075e-08	7.44201e-07	6.45663e-07	EDN1/FPR1/FPR3/CXCL1/CXCL2/CXCL8/CXCL10/CCL4L1/CCL3L3/CXCL9/CCL2/CCL3/CCL3L1/CCL7/CCL20/CXCL11/CXCL5/C5AR1/CCR2/CCRL2	20
R-HSA-1169408	ISG15 antiviral mechanism	11/229	72/10654	3.39536e-07	2.0474e-05	1.77631e-05	USP18/DDX58/IFIT1/MX1/MX2/HERC5/EIF2AK2/STAT1/TRIM25/UBE2L6/ISG15	11
R-HSA-168928	DDX58/IFIH1-mediated induction of interferon-alpha/beta	11/229	78/10654	7.8029e-07	4.22871e-05	3.66879e-05	DDX58/IFNB1/IRF7/NFKB1/NFKBIA/HERC5/IFIH1/TRIM25/DHX58/UBE2L6/ISG15	11
R-HSA-373076	Class A/1 (Rhodopsin-like receptors)	23/229	335/10654	8.41534e-07	4.22871e-05	3.66879e-05	ADORA2A/EDN1/FPR1/FPR3/FFAR2/CXCL1/CXCL2/CXCL8/CXCL10/CCL4L1/CCL3L3/CXCL9/PTGER2/CCL2/CCL3/CCL3L1/CCL7/CCL20/CXCL11/CXCL5/C5AR1/CCR2/CCRL2	23
R-HSA-168181	Toll Like Receptor 7/8 (TLR7/8) Cascade	11/229	93/10654	4.60802e-06	0.000198474	0.000172194	MAP3K8/TICAM1/FOS/IRAK2/IRF7/NFKB1/NFKBIA/TLR7/RPS6KA1/MAPKAPK3/RIPK2	11
R-HSA-975155	MyD88 dependent cascade initiated on endosome	11/229	93/10654	4.60802e-06	0.000198474	0.000172194	MAP3K8/TICAM1/FOS/IRAK2/IRF7/NFKB1/NFKBIA/TLR7/RPS6KA1/MAPKAPK3/RIPK2	11
R-HSA-168164	Toll Like Receptor 3 (TLR3) Cascade	11/229	94/10654	5.12125e-06	0.000205874	0.000178615	MAP3K8/TICAM1/FOS/BIRC3/IRAK2/IRF7/NFKB1/NFKBIA/RPS6KA1/MAPKAPK3/RIPK2	11
R-HSA-168898	Toll-like Receptor Cascades	14/229	155/10654	5.97691e-06	0.000225255	0.000195429	MAP3K8/TICAM1/CTSL/FOS/BIRC3/IRAK2/IRF7/NFKB1/NFKBIA/TLR7/RPS6KA1/MAPKAPK3/SOCS1/RIPK2	14
[truncated: 587 more rows]

## Sheet: Table S5
Supplementary Table S5. Meta-significant genes among WBCs and PBMCs datasets (GSE65088, GSE114180, GSE42606, and GSE154911).
[truncated: 8,263 more rows]

[truncated: 13 more sheets: Table S6, Table S7, Table S8, Table S9, Table S10, Table S11, Table S12, Table S13, Table S14, Table S15, Table S16, Table S17, Table S18]
